# Supplementary material for: Nurturing the blossoming hydrogen economy using HBAT: modelling every link in the H2 supply chain
Source: Royal Society of Chemistry journal article supplement (doi:10.1039/d3ee02789a), 2024-01-01
Supplement: d3ee02789a1.zip [file d3ee02789a1.zip]

## Sheet: Full Table
Scenario#	Production	Storage	Transportation	End Use	Supply Chain #	Electrolyzer Lifetime	Feedstock Price	Production Scale	Reinvestment Rate	Discount Rate	Cost of Water	BreakEven H2 Price	Total Overnight Investment	25 year NPV	Payback Period	Initial Profit Margin	Max Profit Margin	Optimum Production	Carbon Footprint	NOx Emissions	SOx Emissions	CH4 Emissions	Monthly EBITDA @year25	Renewable Energy Capacity Increase	Final Production	Sum Prod	Total Prod (MT)	Total RE (GWh)	Total CF	Net CF	Total H2 Power (GWh)	US CF Margin	Final RE Installed	Month	A	B	IP	Even	Cars Removed	Homes Powered	Profitable Cars	Profitable Homes	Emissions Class	Eq. FCEV Efficiency
1	Biomass Gasification	Gas H2	Pipeline	Fertilizer	1	10	100	50000	0.2	0.08	1.6	3.46	334150594	896966678	7.17	0.287	0.484	115000	622705	20.975	9.54937	63.4985	18977682	0	164384	44306268	1.29227e+06	0	4.6007e+07	3.51159e+07	43071.2	2.9303e+07	0					FALSE	0	0	0	0	Grey	0
2	Biomass Gasification	Gas H2	Pipeline	FCEV filling	2	10	100	50000	0.2	0.08	1.6	4	933502866	-231054621	>25 years	0.056	0.401	459000	623523	21.5821	10.067	65.2992	79517602	0	861691	72186109	2.10543e+06	0	7.50554e+07	5.72127e+07	70173.9	4.78405e+07	0	233.64	3969.53	0.0192325	7.05187e+07	TRUE	0	0	-1	-1	Grey	0
3	Biomass Gasification	Gas H2	Railcar	Fertilizer	3	10	100	50000	0.2	0.08	1.6	3.79	299373042	838112363	7	0.2579	0.436	115000	623546	20.2447	18.1117	45.8055	17381488	0	164384	44417837	1.29552e+06	0	4.61851e+07	3.52044e+07	43179.7	2.94391e+07	0					FALSE	0	0	0	0	Grey	0
4	Biomass Gasification	Gas H2	Railcar	FCEV filling	4	10	100	50000	0.2	0.08	1.6	8.54	370624982	-576993326	>25 years	0	0	N/A	623548	20.2537	18.1118	45.8077	-1246621	0	50000	14775000	430938	0	1.53629e+07	1.17103e+07	14363.1	9.79258e+06	0					TRUE	0	0	-1	-1	Grey	0
5	Biomass Gasification	Formic Acid	Pipeline	Fertilizer	5	10	100	50000	0.2	0.08	1.6	4.06	558290625	315934619	13.75	0.1906	0.398	134000	612130	21.0335	13.1094	97.7956	17620779	0	164384	41570975	1.21249e+06	0	4.24336e+07	3.2948e+07	40412.2	2.67609e+07	0					FALSE	0	0	0	0	Grey	0
6	Biomass Gasification	Formic Acid	Pipeline	FCEV filling	6	10	100	50000	0.2	0.08	1.6	5.16	1273070458	-1128824034	>25 years	0	0.281	246000	612649	21.4184	13.4375	98.9374	17079105	0	250055	26827643	782473	0	2.74075e+07	2.12629e+07	26079.8	1.72932e+07	0	321.421	4238.13	0.0137763	3.2623e+07	TRUE	0	0	-1	-1	Grey	0
7	Biomass Gasification	Formic Acid	Railcar	Fertilizer	7	10	100	50000	0.2	0.08	1.6	4	509113015	422141253	12.33	0.204	0.406	132000	612114	21.1805	13.0769	97.725	17758852	0	164384	42171896	1.23001e+06	0	4.30459e+07	3.34243e+07	40996.4	2.71467e+07	0					FALSE	0	0	0	0	Grey	0
8	Biomass Gasification	Formic Acid	Railcar	FCEV filling	8	10	100	50000	0.2	0.08	1.6	3.84	511855483	1445615167	15	0.1592	0.4	276000	612486	22.9539	13.0985	98.1997	111527101	0	1.12808e+06	136296657	3.97532e+06	0	1.39206e+08	1.08025e+08	132497	8.78205e+07	0	155.036	3496.7	0.0298014	1.29772e+08	TRUE	0	0	0	0	Grey	0
9	Biomass Gasification	Liquid H2	Truck	Fertilizer	9	10	100	50000	0.2	0.08	1.6	5.15	698474660	-287453070	>25 years	0.0507	0.248	143000	687159	67.7389	58.1375	185.542	12789199	0	164383	36936293	1.07731e+06	0	4.2324e+07	2.92747e+07	35906.7	2.83986e+07	0					FALSE	0	0	-1	-1	Grey	0
10	Biomass Gasification	Liquid H2	Truck	FCEV filling	10	10	100	50000	0.2	0.08	1.6	4.64	705183326	-46756546	>25 years	0.0253	0.306	440000	691526	73.9912	58.3152	191.176	72695466	0	941702	84492760	2.46437e+06	0	9.74326e+07	6.69666e+07	82137.5	6.55779e+07	0	220.693	3913.1	0.0204256	8.02346e+07	TRUE	0	0	-1	-1	Grey	0
11	Biomass Gasification	Liquid H2	Railcar	Fertilizer	11	10	100	50000	0.2	0.08	1.6	5.12	697111034	-276771819	>25 years	0.0547	0.253	143000	686701	67.0959	58.119	184.95	12895974	0	164383	37053093	1.08072e+06	0	4.24295e+07	2.93673e+07	36020.2	2.84601e+07	0					FALSE	0	0	-1	-1	Grey	0
12	Biomass Gasification	Liquid H2	Railcar	FCEV filling	12	10	100	50000	0.2	0.08	1.6	4.6	703874244	-12481969	24.75	0.0328	0.313	440000	686738	67.2754	58.1211	184.998	74169255	0	950348	86038909	2.50947e+06	0	9.85286e+07	6.81921e+07	83640.6	6.6091e+07	0	219.136	3905.9	0.0205791	8.16327e+07	TRUE	0	0	-1	-1	Grey	0
13	CO2 Electrolysis PV Coupled	Methyl Formate	Pipeline	Fertilizer	13	10	0	50000	0.2	0.08	1.6	2.96	503732802	894964785	8.92	0.3074	0.551	122000	102307	14.4514	6.64772	92.5141	22963214	68.5	164384	43711004	1.2749e+06	17466.2	7.45717e+06	-2.51674e+06	42492.6	-9.02235e+06	225.205					FALSE	1.96138e+06	3.99667e+06	1.96138e+06	3.99667e+06	Grey	0
14	CO2 Electrolysis PV Coupled	Methyl Formate	Pipeline	FCEV filling	14	10	0	50000	0.2	0.08	1.6	3.29	1105949769	-49852394	24.75	0.0725	0.486	440000	102724	14.7605	6.91136	93.4312	110857633	68.5	941288	84567717	2.46656e+06	33791.9	1.44861e+07	-4.88352e+06	82210.4	-1.73968e+07	1289.56	220.766	3913.44	0.0204184	8.01521e+07	TRUE	3.78191e+06	7.73235e+06	-1	-1	Grey	0.454353
15	CO2 Electrolysis PV Coupled	Methyl Formate	Railcar	Fertilizer	15	10	0	50000	0.2	0.08	1.6	2.87	454501336	1018859603	7.92	0.3225	0.561	119000	102303	14.6067	6.62211	92.4673	23182596	68.5	164384	44148117	1.28765e+06	17640.9	7.53139e+06	-2.54111e+06	42917.5	-9.11292e+06	225.205					FALSE	1.98107e+06	4.03663e+06	1.98107e+06	4.03663e+06	Grey	0
16	CO2 Electrolysis PV Coupled	Methyl Formate	Railcar	FCEV filling	16	10	0	50000	0.2	0.08	1.6	2.58	462370337	3085708130	9.25	0.2904	0.543	166000	102674	16.3822	6.64386	92.9425	152885639	68.5	1.14331e+06	148915640	4.34337e+06	59504.2	2.54964e+07	-8.57128e+06	144765	-3.06464e+07	1566.33	140.738	3360.55	0.0331112	1.39848e+08	TRUE	6.66227e+06	1.36159e+07	6.66227e+06	1.36159e+07	Grey	0.454133
17	CO2 Electrolysis PV Coupled	Formic Acid	Pipeline	Fertilizer	17	10	0	50000	0.2	0.08	1.6	3.21	1023173141	177782011	17.17	0.1755	0.507	137000	6999.5	14.4594	6.65455	92.5379	25356589	273.9	164384	41236865	1.20274e+06	65886.2	481314	-8.92805e+06	40087.4	-1.50654e+07	900.493					FALSE	3.27509e+06	3.77045e+06	3.27509e+06	3.77045e+06	Green	0
18	CO2 Electrolysis PV Coupled	Formic Acid	Pipeline	FCEV filling	18	10	0	50000	0.2	0.08	1.6	3.22	1737959447	-1226004328	>25 years	0	0.525	519000	7518.03	14.8444	6.98271	93.6797	83197542	273.9	662683	50207721	1.46439e+06	80219.4	629435	-1.08703e+07	48808.2	-1.82994e+07	3630.18	262.472	4076.4	0.0170186	5.22206e+07	TRUE	3.97813e+06	4.59069e+06	-1	-1	Green	0.0332526
19	CO2 Electrolysis PV Coupled	Formic Acid	Railcar	Fertilizer	19	10	0	50000	0.2	0.08	1.6	3.15	973995531	284232782	15.75	0.1889	0.516	135000	6983.9	14.6064	6.62209	92.4673	25494663	273.9	164384	41662965	1.21517e+06	66567	485204	-9.0203e+06	40501.6	-1.52222e+07	900.493					FALSE	3.30917e+06	3.80941e+06	3.30917e+06	3.80941e+06	Green	0
20	CO2 Electrolysis PV Coupled	Formic Acid	Railcar	FCEV filling	20	10	0	50000	0.2	0.08	1.6	2.42	976744472	1831244472	16.67	0.1441	0.553	286000	7355.12	16.3799	6.6437	92.942	167896758	273.9	1.12499e+06	134477077	3.92225e+06	214861	1.64936e+06	-2.91152e+07	130729	-4.90499e+07	6162.72	157.532	3518.21	0.0292904	1.27783e+08	TRUE	1.0663e+07	1.22958e+07	1.0663e+07	1.22958e+07	Green	0.0325321
21	CO2 Electrolysis PV Coupled	Methanol	Pipeline	Fertilizer	21	10	0	50000	0.2	0.08	1.6	4.28	1427252364	-776516709	>25 years	0	0.36	147000	3015.23	0.026458	0.022571	0.07848	22363440	273.9	164382	36565551	1.0665e+06	58422.6	183852	-8.15962e+06	35546.3	-1.36017e+07	900.487					FALSE	2.9569e+06	3.34333e+06	-1	-1	Green	0
22	CO2 Electrolysis PV Coupled	Methanol	Pipeline	FCEV filling	22	10	0	50000	0.2	0.08	1.6	4.95	2030264310	-1906146273	>25 years	0	0.327	220000	3351.86	0.276356	0.235755	0.819711	21507400	273.9	223685	25148828	733507	40181.5	140566	-5.6196e+06	24447.8	-9.34081e+06	1225.35	325.188	4246.57	0.0136106	3.22792e+07	TRUE	2.03061e+06	2.29945e+06	-1	-1	Green	0.0148254
23	CO2 Electrolysis PV Coupled	Methanol	Railcar	Fertilizer	23	10	0	50000	0.2	0.08	1.6	4.2	1377892517	-676827544	>25 years	0.0039	0.368	147000	3018.95	0.187993	0.002288	0.050325	22652672	273.9	164383	37182516	1.08449e+06	59408.4	187185	-8.29609e+06	36146.1	-1.3831e+07	900.489					FALSE	3.00674e+06	3.39974e+06	-1	-1	Green	0
24	CO2 Electrolysis PV Coupled	Methanol	Railcar	FCEV filling	24	10	0	50000	0.2	0.08	1.6	2.85	1385967446	-66897617	>25 years	0	0.524	438000	3390.78	1.96356	0.023893	0.525644	141042314	273.9	986794	92924226	2.71029e+06	148470	525417	-2.0733e+07	90334	-3.4508e+07	5405.66	211.966	3871.47	0.0213171	8.68912e+07	TRUE	7.50174e+06	8.49642e+06	-1	-1	Green	0.0149976
25	N2 Electrolysis PV Coupled	Ammonia	Pipeline	Fertilizer	25	10	0	50000	0.2	0.08	1.6	2.03	667447561	1137001507	8.5	0.3607	0.667	118000	29.2259	0.021691	0.018492	0.064338	28061163	249.5	164384	44201403	1.28921e+06	64331.5	2154.17	-1.00837e+07	42969.3	-1.66622e+07	820.274					FALSE	3.62223e+06	4.04151e+06	3.62223e+06	4.04151e+06	Green	0
26	N2 Electrolysis PV Coupled	Ammonia	Pipeline	FCEV filling	26	10	0	50000	0.2	0.08	1.6	2.8	1568183444	-668245637	>25 years	0	0.556	474000	305.261	0.226565	0.193148	0.672009	114588312	249.5	840126	69044396	2.01379e+06	100488	35146	-1.5779e+07	67119.8	-2.59953e+07	4192.23	236.871	3982.72	0.0189561	6.81175e+07	TRUE	5.65116e+06	6.313e+06	-1	-1	Green	0.00135018
27	N2 Electrolysis PV Coupled	Ammonia	Railcar	Fertilizer	27	10	0	50000	0.2	0.08	1.6	1.92	618842251	1268516746	7.67	0.3772	0.679	111000	8.94212	0.042679	0.000528	0.011422	28358036	249.5	164384	44549559	1.29936e+06	64838.2	664.294	-1.01634e+07	43307.7	-1.6795e+07	820.274					FALSE	3.65109e+06	4.07334e+06	3.65109e+06	4.07334e+06	Green	0
28	N2 Electrolysis PV Coupled	Ammonia	Railcar	FCEV filling	28	10	0	50000	0.2	0.08	1.6	1.92	927593397	2459041889	14.58	0.2202	0.619	258000	93.3996	0.445778	0.005514	0.119297	181848528	249.5	1.13373e+06	139771709	4.07667e+06	203426	21769.1	-3.1954e+07	135876	-5.26737e+07	5657.3	150.153	3452.78	0.0308548	1.33266e+08	TRUE	1.14508e+07	1.27799e+07	1.14508e+07	1.27799e+07	Green	0.000413111
29	H2O electrolysis PV Coupled	Gas H2	Pipeline	Fertilizer	29	10	0	50000	0.2	0.08	1.6	2.46	739822010	888620629	10.33	0.3003	0.609	123000	17574.2	14.401	3.09453	58.2408	27156228	249.5	164384	43582209	1.27115e+06	63430.3	1.2772e+06	-9.43583e+06	42367.4	-1.51538e+07	820.274					FALSE	3.29429e+06	3.98489e+06	3.29429e+06	3.98489e+06	Green	0
30	H2O electrolysis PV Coupled	Gas H2	Pipeline	FCEV filling	30	10	0	50000	0.2	0.08	1.6	2.5	1339190478	247023001	23.17	0.0678	0.573	411000	18392	15.0081	3.61215	60.0415	147616464	249.5	1.01186e+06	98321955	2.86772e+06	143099	3.01547e+06	-2.12873e+07	95581.2	-3.4053e+07	5049.18	206.223	3842.29	0.0219473	9.15939e+07	TRUE	7.40282e+06	8.98996e+06	7.40282e+06	8.98996e+06	Green	0.0813485
31	H2O electrolysis PV Coupled	Gas H2	Railcar	Fertilizer	31	10	0	50000	0.2	0.08	1.6	2.78	705044458	829381359	10.5	0.2712	0.564	124000	18415.5	13.6706	11.6568	40.5477	25491593	249.5	164384	43614532	1.27209e+06	63477.3	1.33934e+06	-9.44283e+06	42398.8	-1.51038e+07	820.274	-11874.6	-7423.08			FALSE	3.28343e+06	3.98785e+06	3.28343e+06	3.98785e+06	Green	0
32	H2O electrolysis PV Coupled	Gas H2	Railcar	FCEV filling	32	10	0	50000	0.2	0.08	1.6	5.8	776312593	-710067887	>25 years	0	0.181	510000	18417.4	13.6797	11.657	40.55	22830753	249.5	518113	37508976	1.09401e+06	54591.2	1.15197e+06	-8.12094e+06	36463.4	-1.29893e+07	2585.39	283.127	4140.32	0.0157221	4.27024e+07	TRUE	2.82376e+06	3.42959e+06	-1	-1	Green	0.0814611
33	H2O electrolysis PV Coupled	Formic Acid	Pipeline	Fertilizer	33	10	0	50000	0.2	0.08	1.6	3.88	922162968	47442176	18.17	0.125	0.417	138000	146211	14.4594	6.65455	92.5379	21374705	249.5	164384	40824488	1.19071e+06	59416.6	9.95354e+06	638271	39686.5	-5.43773e+06	820.274					FALSE	1.18212e+06	3.73274e+06	1.18212e+06	3.73274e+06	Grey	0
34	H2O electrolysis PV Coupled	Formic Acid	Pipeline	FCEV filling	34	10	0	50000	0.2	0.08	1.6	4.37	1636918310	-1424995220	>25 years	0	0.397	383000	146730	14.8444	6.98271	93.6797	35862853	249.5	389698	33386275	973766	48590.9	8.16887e+06	521978	32455.6	-4.41811e+06	1944.59	301.472	4190.12	0.0147257	3.65202e+07	TRUE	960459	3.05264e+06	-1	-1	Grey	0.648992
35	H2O electrolysis PV Coupled	Formic Acid	Railcar	Fertilizer	35	10	0	50000	0.2	0.08	1.6	3.82	872985358	152745822	17.25	0.1384	0.421	137000	146196	14.6064	6.62209	92.4673	21512780	249.5	164384	41338495	1.20571e+06	60164.7	1.00778e+07	646307	40186.2	-5.50727e+06	820.274					FALSE	1.19723e+06	3.77974e+06	1.19723e+06	3.77974e+06	Grey	0
36	H2O electrolysis PV Coupled	Formic Acid	Railcar	FCEV filling	36	10	0	50000	0.2	0.08	1.6	3.2	875703335	1320755292	17.17	0.0937	0.454	310000	146567	16.3799	6.6437	92.942	139672919	249.5	1.11782e+06	130834442	3.816e+06	190419	3.19767e+07	2.04553e+06	127187	-1.73493e+07	5577.9	162.897	3562.45	0.028249	1.2375e+08	TRUE	3.77158e+06	1.19627e+07	3.77158e+06	1.19627e+07	Grey	0.648272
37	H2O electrolysis PV Coupled	Liquid H2	Truck	Fertilizer	37	10	0	50000	0.2	0.08	1.6	4.16	1104146076	-323813216	24.67	0.0632	0.378	142000	82028.8	61.1648	51.6827	180.284	20899400	249.5	164383	38853026	1.13321e+06	56547.3	5.31456e+06	-8.41193e+06	37770	-9.33345e+06	820.273					FALSE	2.02901e+06	3.55248e+06	-1	-1	Grey	0
38	H2O electrolysis PV Coupled	Liquid H2	Truck	FCEV filling	38	10	0	50000	0.2	0.08	1.6	3.13	1110854742	501708607	22	0.0379	0.48	396000	86395.7	67.4171	51.8604	185.918	137421225	249.5	1.05727e+06	109580306	3.19609e+06	159485	1.5787e+07	-2.37248e+07	106526	-2.55259e+07	5275.76	192.932	3768.68	0.0235595	1.01489e+08	TRUE	5.54911e+06	1.00194e+07	5.54911e+06	1.00194e+07	Grey	0.382132
39	H2O electrolysis PV Coupled	Liquid H2	Railcar	Fertilizer	39	10	0	50000	0.2	0.08	1.6	4.13	1102782450	-312475212	24.33	0.0673	0.382	142000	81570.4	60.5219	51.6641	179.692	21006166	249.5	164383	38913740	1.13498e+06	56635.7	5.29312e+06	-8.42508e+06	37829	-9.37778e+06	820.273					FALSE	2.03865e+06	3.55803e+06	-1	-1	Grey	0
40	H2O electrolysis PV Coupled	Liquid H2	Railcar	FCEV filling	40	10	0	50000	0.2	0.08	1.6	3.09	1109545660	541185291	21.75	0.0453	0.486	396000	81607.8	60.7013	51.6662	179.74	138618724	249.5	1.06004e+06	110357593	3.21876e+06	160616	1.50179e+07	-2.38931e+07	107281	-2.65881e+07	5289.59	191.947	3762.85	0.0236885	1.02228e+08	TRUE	5.78001e+06	1.00904e+07	5.78001e+06	1.00904e+07	Grey	0.360955
41	SMR	Gas H2	Pipeline	Fertilizer	41	10	6.5	50000	0.2	0.08	1.6	1.81	1.76292e+08	1818337112	2.83	0.477	0.702	71000	147410	68.5876	3.09453	177.237	25698144	0	164384	45991535	1.34142e+06	0	1.13053e+07		44709.5	-6.03402e+06	0					FALSE	1.31174e+06	4.20518e+06	1.31174e+06	4.20518e+06	Grey	0
42	SMR	Gas H2	Pipeline	FCEV filling	42	10	6.5	50000	0.2	0.08	1.6	2.56	775644559	1635187173	16.25	0.2462	0.577	297000	148228	69.1946	3.61215	179.038	147557326	0	1.11165e+06	128257520	3.74084e+06	0	3.17022e+07		124682	-1.66523e+07	0	167.082	3595.2	0.0274865	1.20981e+08	TRUE	3.62006e+06	1.17271e+07	3.62006e+06	1.17271e+07	Grey	0.655619
43	SMR	Gas H2	Railcar	Fertilizer	43	10	6.5	50000	0.2	0.08	1.6	2.13	141514735	1759206617	2.42	0.448	0.652	65000	148251	67.8572	11.6568	159.544	24101950	0	164384	46105786	1.34475e+06	0	1.1398e+07		44820.6	-5.98433e+06	0	-4451.48				FALSE	1.30094e+06	4.21563e+06	1.30094e+06	4.21563e+06	Grey	0
44	SMR	Gas H2	Railcar	FCEV filling	44	10	6.5	50000	0.2	0.08	1.6	5.79	212766675	542543643	15.08	0.0344	0.143	259000	148253	67.8662	11.657	159.547	43406202	0	1.12918e+06	136662019	3.98598e+06	0	3.37853e+07		132853	-1.77377e+07	0	154.122	3488.67	0.0299931	1.30403e+08	TRUE	3.85602e+06	1.24955e+07	3.85602e+06	1.24955e+07	Grey	0.655731
45	SMR	Formic Acid	Pipeline	Fertilizer	45	10	6.5	50000	0.2	0.08	1.6	2.3	357190563	1324423707	5.92	0.402	0.645	109000	136835	68.646	0.034745	211.535	24728138	0	164384	44790327	1.30638e+06	0	1.02202e+07	-789820	43541.8	-6.66624e+06	0					FALSE	1.44918e+06	4.09535e+06	1.44918e+06	4.09535e+06	Grey	0
46	SMR	Formic Acid	Pipeline	FCEV filling	46	10	6.5	50000	0.2	0.08	1.6	3	1071945905	200228495	23.33	0.1213	0.527	415000	137354	69.031	0.362905	212.676	121764604	0	976653	91216798	2.66049e+06	0	2.08926e+07	-1.65402e+06	88674.1	-1.34971e+07	0	214.078	3881.83	0.0210943	8.55695e+07	TRUE	2.93416e+06	8.34031e+06	2.93416e+06	8.34031e+06	Grey	0.607523
47	SMR	Formic Acid	Railcar	Fertilizer	47	10	6.5	50000	0.2	0.08	1.6	2.23	308012953	1446002084	5.08	0.4154	0.652	102000	136820	68.793	0.002288	211.464	24866208	0	164384	45155282	1.31703e+06	0	1.03023e+07	-860779	43896.6	-6.72174e+06	0					FALSE	1.46125e+06	4.12872e+06	1.46125e+06	4.12872e+06	Grey	0
48	SMR	Formic Acid	Railcar	FCEV filling	48	10	6.5	50000	0.2	0.08	1.6	2.27	310730930	3744611144	6	0.3706	0.595	119000	137191	70.5665	0.023893	211.939	157279637	0	1.14427e+06	151132628	4.40803e+06	0	3.45748e+07	-2.78792e+06	146920	-2.24038e+07	0	139.705	3349.76	0.0333792	1.40603e+08	TRUE	4.87039e+06	1.38186e+07	4.87039e+06	1.38186e+07	Grey	0.606802
49	SMR	Liquid H2	Truck	Fertilizer	49	10	6.5	50000	0.2	0.08	1.6	3.6	540616353	506794680	11.67	0.2408	0.464	129000	211865	115.351	51.6827	299.28	19509817	0	164384	42317776	1.23427e+06	0	1.49506e+07	4.54834e+06	41138.2	-1.00369e+06	0					FALSE	218194	3.86928e+06	218194	3.86928e+06	Grey	0
50	SMR	Liquid H2	Truck	FCEV filling	50	10	6.5	50000	0.2	0.08	1.6	3.22	547325018	1949767246	13.58	0.2154	0.478	250000	216232	121.604	51.8604	304.915	131607346	0	1.13404e+06	140054499	4.08492e+06	0	5.05001e+07	1.5882e+07	136150	-2.30193e+06	0	149.874	3450.19	0.0309173	1.33212e+08	TRUE	500420	1.28057e+07	500420	1.28057e+07	Grey	0.956403
51	SMR	Liquid H2	Railcar	Fertilizer	51	10	6.5	50000	0.2	0.08	1.6	3.56	539252727	519043458	11.58	0.2449	0.468	131000	211406	114.709	51.6641	298.689	19616581	0	164384	42359404	1.23548e+06	0	1.49329e+07	4.46101e+06	41178.6	-1.03706e+06	0					FALSE	225447	3.87308e+06	225447	3.87308e+06	Grey	0
52	SMR	Liquid H2	Railcar	FCEV filling	52	10	6.5	50000	0.2	0.08	1.6	3.17	546015937	1992607778	13.42	0.2229	0.482	232000	211444	114.888	51.6662	298.737	132518063	0	1.13452e+06	140392196	4.09477e+06	0	4.9501e+07	1.47935e+07	136479	-3.42837e+06	0	149.432	3446.08	0.0310167	1.33687e+08	TRUE	745299	1.28366e+07	745299	1.28366e+07	Grey	0.935225
53	CO Purchase	Methyl Formate	Pipeline	Fertilizer	53	10	0.3	50000	0.2	0.08	1.6	6.23	258677705	-90392039	22.75	0.0146	0.102	140000	486138	21.0254	13.1026	97.7719	4884614	0	164383	37579062	1.09606e+06	0	3.04636e+07	2.18889e+07	36531.5	1.62959e+07	0					FALSE	0	0	-1	-1	Grey	0
54	CO Purchase	Methyl Formate	Pipeline	FCEV filling	54	10	0.3	50000	0.2	0.08	1.6	9.17	860863708	-1073254956	>25 years	0	0	N/A	486554	21.3346	13.3662	98.6889	-1830123	0	50000	14775000	430938	0	1.19877e+07	8.60356e+06	14363.1	6.41734e+06	0					TRUE	0	0	-1	-1	Grey	0
55	CO Purchase	Methyl Formate	Railcar	Fertilizer	55	10	0.3	50000	0.2	0.08	1.6	6.16	209446239	16747379	16.67	0.0297	0.111	131000	486133	21.1807	13.077	97.7251	5104027	0	164383	40364089	1.17729e+06	0	3.2721e+07	2.35118e+07	39238.9	1.75033e+07	0					FALSE	0	0	0	0	Grey	0
56	CO Purchase	Methyl Formate	Railcar	FCEV filling	56	10	0.3	50000	0.2	0.08	1.6	6.18	217284276	54483879	21.92	0	0.102	372000	486505	22.9563	13.0987	98.2002	26241758	0	1.01199e+06	97018494	2.82971e+06	0	7.87078e+07	5.65127e+07	94314.1	4.21308e+07	0	206.19	3842.12	0.021951	9.16308e+07	TRUE	0	0	0	0	Grey	0
57	CO Purchase	Formic Acid	Pipeline	Fertilizer	57	10	0.3	50000	0.2	0.08	1.6	4.95	255123898	418408795	8.92	0.1476	0.275	123000	390830	21.0335	13.1094	97.7956	11164529	0	164384	43567683	1.27072e+06	0	2.83941e+07	1.84529e+07	42353.2	1.19686e+07	0					FALSE	0	0	0	0	Grey	0
58	CO Purchase	Formic Acid	Pipeline	FCEV filling	58	10	0.3	50000	0.2	0.08	1.6	8.31	969872618	-986781447	>25 years	0	0	N/A	391348	21.4184	13.4375	98.9374	-302291	0	50000	14775000	430938	0	9.642e+06	6.25789e+06	14363.1	4.07167e+06	0					TRUE	0	0	-1	-1	Grey	0
59	CO Purchase	Formic Acid	Railcar	Fertilizer	59	10	0.3	50000	0.2	0.08	1.6	4.88	205946288	537552784	7	0.161	0.283	114000	390814	21.1805	13.0769	97.725	11302600	0	164384	44472840	1.29712e+06	0	2.89829e+07	1.88363e+07	43233.2	1.22161e+07	0					FALSE	0	0	0	0	Grey	0
60	CO Purchase	Formic Acid	Railcar	FCEV filling	60	10	0.3	50000	0.2	0.08	1.6	5.04	208657643	1318968472	9.17	0.1163	0.238	162000	391185	22.9539	13.0985	98.1997	66266614	0	1.14314e+06	148618426	4.3347e+06	0	9.69463e+07	6.29467e+07	144476	4.09156e+07	0	140.914	3362.36	0.0330662	1.3966e+08	TRUE	0	0	0	0	Grey	0
61	CO Purchase	Methanol	Pipeline	Fertilizer	61	10	0.3	50000	0.2	0.08	1.6	6.01	659981575	-520543656	>25 years	0	0.129	148000	386846	2.7198	3.83784	0.07848	8164254	0	164341	30952803	902790	0	1.9967e+07	1.29043e+07	30090	8.2975e+06	0					FALSE	0	0	-1	-1	Grey	0
62	CO Purchase	Methanol	Pipeline	FCEV filling	62	10	0.3	50000	0.2	0.08	1.6	9.71	1262941738	-1444751814	>25 years	0	0	N/A	387182	2.9697	4.05102	0.819711	-1542721	0	50000	14775000	430938	0	9.53935e+06	6.15524e+06	14363.1	3.96902e+06	0					TRUE	0	0	-1	-1	Grey	0
63	CO Purchase	Methanol	Railcar	Fertilizer	63	10	0.3	50000	0.2	0.08	1.6	5.95	610621727	-433446793	>25 years	0	0.138	149000	386849	2.88134	3.81755	0.050325	8457227	0	164372	33032352	963444	0	2.13087e+07	1.37723e+07	32111.6	8.85517e+06	0					FALSE	0	0	-1	-1	Grey	0
64	CO Purchase	Methanol	Railcar	FCEV filling	64	10	0.3	50000	0.2	0.08	1.6	5.55	618665692	-444634309	>25 years	0	0.203	514000	387221	4.65691	3.83916	0.525644	30757242	0	636834	47718528	1.39179e+06	0	3.08122e+07	1.98955e+07	46388.4	1.28218e+07	0	266.166	4088.52	0.0167713	5.03863e+07	TRUE	0	0	-1	-1	Grey	0
65	CO2 Electrolysis PV Coupled	Methyl Formate	Pipeline	Fertilizer	13	20	0	50000	0.2	0.08	1.6	2.81	503711984	909082684	8.67	0.3245	0.571	119000	102307	14.4514	6.64772	92.5141	23031655	68.5	164384	43722011	1.27523e+06	17470.6	7.45905e+06	-2.51737e+06	42503.3	-9.02462e+06	225.205					FALSE	1.96187e+06	3.99767e+06	1.96187e+06	3.99767e+06	Grey	0
66	CO2 Electrolysis PV Coupled	Methyl Formate	Pipeline	FCEV filling	14	20	0	50000	0.2	0.08	1.6	3.2	1105928952	-11535563	24.33	0.0901	0.498	436000	102724	14.7605	6.91136	93.4312	111603843	68.5	50000	15000000	437500	5993.75	2.56944e+06	-866203	14581.9	-3.08572e+06	68.5	300	5000	7.70988e-19	50000	TRUE	670808	1.37151e+06	-1	-1	Grey	0.454353
67	CO2 Electrolysis PV Coupled	Methyl Formate	Railcar	Fertilizer	15	20	0	50000	0.2	0.08	1.6	2.73	454480518	1032379476	7.67	0.3397	0.575	119000	102303	14.6067	6.62211	92.4673	23251037	68.5	164384	44157111	1.28792e+06	17644.4	7.53292e+06	-2.54163e+06	42926.2	-9.11478e+06	225.205					FALSE	1.98147e+06	4.03746e+06	1.98147e+06	4.03746e+06	Grey	0
68	CO2 Electrolysis PV Coupled	Methyl Formate	Railcar	FCEV filling	16	20	0	50000	0.2	0.08	1.6	2.49	462349519	3125547165	9	0.3075	0.563	162000	102674	16.3822	6.64386	92.9425	153338719	68.5	50000	15000000	437500	5993.75	2.5682e+06	-863369	14581.9	-3.08696e+06	68.5	300	5000	7.70988e-19	50000	TRUE	671078	1.37151e+06	671078	1.37151e+06	Grey	0.454133
69	CO2 Electrolysis PV Coupled	Formic Acid	Pipeline	Fertilizer	17	20	0	50000	0.2	0.08	1.6	2.81	1023152324	218259132	15.67	0.2313	0.566	133000	6999.5	14.4594	6.65455	92.5379	25425031	273.9	164384	41254420	1.20325e+06	65914.2	481519	-8.93185e+06	40104.5	-1.50718e+07	900.493					FALSE	3.27649e+06	3.77205e+06	3.27649e+06	3.77205e+06	Green	0
70	CO2 Electrolysis PV Coupled	Formic Acid	Pipeline	FCEV filling	18	20	0	50000	0.2	0.08	1.6	2.99	1737938630	-1150875162	>25 years	0	0.556	501000	7518.03	14.8444	6.98271	93.6797	84181017	273.9	50000	15000000	437500	23966.2	188049	-3.2476e+06	14581.9	-5.46711e+06	273.9	300	5000	7.70988e-19	50000	TRUE	1.1885e+06	1.37151e+06	-1	-1	Green	0.0332526
71	CO2 Electrolysis PV Coupled	Formic Acid	Railcar	Fertilizer	19	20	0	50000	0.2	0.08	1.6	2.75	973974713	323513404	14.67	0.2447	0.573	131000	6983.9	14.6064	6.62209	92.4673	25563104	273.9	164384	41678765	1.21563e+06	66592.2	485388	-9.02372e+06	40517	-1.52279e+07	900.493					FALSE	3.31042e+06	3.81085e+06	3.31042e+06	3.81085e+06	Green	0
72	CO2 Electrolysis PV Coupled	Formic Acid	Railcar	FCEV filling	20	20	0	50000	0.2	0.08	1.6	2.18	976723655	1938129668	15.83	0.1999	0.599	278000	7355.12	16.3799	6.6437	92.942	168381726	273.9	50000	15000000	437500	23966.2	183974	-3.2476e+06	14581.9	-5.47119e+06	273.9	300	5000	7.70988e-19	50000	TRUE	1.18939e+06	1.37151e+06	1.18939e+06	1.37151e+06	Green	0.0325321
73	CO2 Electrolysis PV Coupled	Methanol	Pipeline	Fertilizer	21	20	0	50000	0.2	0.08	1.6	3.89	1427231547	-727906562	>25 years	0.0437	0.412	145000	3015.23	0.026458	0.022571	0.07848	22431890	273.9	164382	36602428	1.06757e+06	58481.5	184037	-8.16785e+06	35582.1	-1.36155e+07	900.487					FALSE	2.95988e+06	3.3467e+06	-1	-1	Green	0
74	CO2 Electrolysis PV Coupled	Methanol	Pipeline	FCEV filling	22	20	0	50000	0.2	0.08	1.6	4.91	2030243492	-1856380610	>25 years	0	0.371	224000	3351.86	0.276356	0.235755	0.819711	22015265	273.9	50000	15000000	437500	23966.2	83840.4	-3.3518e+06	14581.9	-5.57132e+06	273.9	300	5000	7.70988e-19	50000	TRUE	1.21116e+06	1.37151e+06	-1	-1	Green	0.0148254
75	CO2 Electrolysis PV Coupled	Methanol	Railcar	Fertilizer	23	20	0	50000	0.2	0.08	1.6	3.81	1377871699	-628730910	>25 years	0.0603	0.426	143000	3018.95	0.187993	0.002288	0.050325	22721118	273.9	164383	37216644	1.08549e+06	59462.9	187357	-8.30371e+06	36179.2	-1.38437e+07	900.489					FALSE	3.0095e+06	3.40286e+06	-1	-1	Green	0
76	CO2 Electrolysis PV Coupled	Methanol	Railcar	FCEV filling	24	20	0	50000	0.2	0.08	1.6	2.62	1385946628	33667699	24	0.041	0.561	428000	3390.78	1.96356	0.023893	0.525644	141709692	273.9	50000	15000000	437500	23966.2	84813.9	-3.34676e+06	14581.9	-5.57035e+06	273.9	300	5000	7.70988e-19	50000	TRUE	1.21094e+06	1.37151e+06	1.21094e+06	1.37151e+06	Green	0.0149976
77	N2 Electrolysis PV Coupled	Ammonia	Pipeline	Fertilizer	25	20	0	50000	0.2	0.08	1.6	1.76	667426743	1157955317	8.17	0.3976	0.708	115000	29.2259	0.021691	0.018492	0.064338	28129604	249.5	164384	44208582	1.28942e+06	64341.9	2154.52	-1.00853e+07	42976.3	-1.6665e+07	820.274					FALSE	3.62282e+06	4.04216e+06	3.62282e+06	4.04216e+06	Green	0
78	N2 Electrolysis PV Coupled	Ammonia	Pipeline	FCEV filling	26	20	0	50000	0.2	0.08	1.6	2.64	1568162626	-606871702	>25 years	0.0241	0.58	463000	305.261	0.226565	0.193148	0.672009	115523327	249.5	50000	15000000	437500	21831.2	7635.53	-3.42801e+06	14581.9	-5.64752e+06	249.5	300	5000	7.70988e-19	50000	TRUE	1.22772e+06	1.37151e+06	-1	-1	Green	0.00135018
79	N2 Electrolysis PV Coupled	Ammonia	Railcar	Fertilizer	27	20	0	50000	0.2	0.08	1.6	1.66	618821433	1288230089	7.33	0.4141	0.721	111000	8.94212	0.042679	0.000528	0.011422	28426477	249.5	164384	44555633	1.29954e+06	64847	664.384	-1.01648e+07	43313.6	-1.67973e+07	820.274					FALSE	3.65158e+06	4.07389e+06	3.65158e+06	4.07389e+06	Green	0
80	N2 Electrolysis PV Coupled	Ammonia	Railcar	FCEV filling	28	20	0	50000	0.2	0.08	1.6	1.76	927572580	2533967223	14.08	0.2576	0.654	249000	93.3996	0.445778	0.005514	0.119297	182320397	249.5	50000	15000000	437500	21831.2	2336.21	-3.42923e+06	14581.9	-5.65282e+06	249.5	300	5000	7.70988e-19	50000	TRUE	1.22887e+06	1.37151e+06	1.22887e+06	1.37151e+06	Green	0.000413111
81	H2O electrolysis PV Coupled	Gas H2	Pipeline	Fertilizer	29	20	0	50000	0.2	0.08	1.6	2.09	739801192	918752917	9.67	0.3519	0.665	121000	17574.2	14.401	3.09453	58.2408	27156228	249.5	164384	43591718	1.27143e+06	63444.1	1.27748e+06	-9.43789e+06	42376.6	-1.51571e+07	820.274					FALSE	3.29501e+06	3.98576e+06	3.29501e+06	3.98576e+06	Green	0
82	H2O electrolysis PV Coupled	Gas H2	Pipeline	FCEV filling	30	20	0	50000	0.2	0.08	1.6	2.28	1339169660	343772595	22.33	0.1206	0.608	401000	18392	15.0081	3.61215	60.0415	148250180	249.5	50000	15000000	437500	21831.2	460039	-3.2476e+06	14581.9	-5.19512e+06	249.5	300	5000	7.70988e-19	50000	TRUE	1.12937e+06	1.37151e+06	1.12937e+06	1.37151e+06	Green	0.0813485
83	H2O electrolysis PV Coupled	Gas H2	Railcar	Fertilizer	31	20	0	50000	0.2	0.08	1.6	2.41	705023641	859162540	9.75	0.3228	0.617	122000	18415.5	13.6706	11.6568	40.5477	25560034	249.5	164384	43624438	1.27238e+06	63491.7	1.33965e+06	-9.44497e+06	42408.4	-1.51072e+07	820.274					FALSE	3.28418e+06	3.98875e+06	3.28418e+06	3.98875e+06	Green	0
84	H2O electrolysis PV Coupled	Gas H2	Railcar	FCEV filling	32	20	0	50000	0.2	0.08	1.6	5.59	776291776	-653798045	>25 years	0	0.202	475000	18417.4	13.6797	11.657	40.55	24269293	249.5	50000	15000000	437500	21831.2	460676	-3.2476e+06	14581.9	-5.19448e+06	249.5	300	5000	7.70988e-19	50000	TRUE	1.12924e+06	1.37151e+06	-1	-1	Green	0.0814611
85	H2O electrolysis PV Coupled	Formic Acid	Pipeline	Fertilizer	33	20	0	50000	0.2	0.08	1.6	3.51	922142151	85932986	16.75	0.1766	0.47	135000	146211	14.4594	6.65455	92.5379	21443146	249.5	164384	40846980	1.19137e+06	59449.4	9.95902e+06	638623	39708.4	-5.44072e+06	820.274					FALSE	1.18277e+06	3.7348e+06	1.18277e+06	3.7348e+06	Grey	0
86	H2O electrolysis PV Coupled	Formic Acid	Pipeline	FCEV filling	34	20	0	50000	0.2	0.08	1.6	4.11	1636897493	-1369802914	>25 years	0	0.439	390000	146730	14.8444	6.98271	93.6797	36706597	249.5	50000	15000000	437500	21831.2	3.67016e+06	234518	14581.9	-1.985e+06	249.5	300	5000	7.70988e-19	50000	TRUE	431521	1.37151e+06	-1	-1	Grey	0.648992
87	H2O electrolysis PV Coupled	Formic Acid	Railcar	Fertilizer	35	20	0	50000	0.2	0.08	1.6	3.45	872964541	189997473	15.58	0.19	0.477	134000	146196	14.6064	6.62209	92.4673	21581221	249.5	164384	41358563	1.20629e+06	60193.9	1.00827e+07	646621	40205.7	-5.50994e+06	820.274					FALSE	1.19781e+06	3.78157e+06	1.19781e+06	3.78157e+06	Grey	0
88	H2O electrolysis PV Coupled	Formic Acid	Railcar	FCEV filling	36	20	0	50000	0.2	0.08	1.6	2.98	875682518	1420437875	16.75	0.1452	0.501	296000	146567	16.3799	6.6437	92.942	140171914	249.5	50000	15000000	437500	21831.2	3.66609e+06	234518	14581.9	-1.98907e+06	249.5	300	5000	7.70988e-19	50000	TRUE	432407	1.37151e+06	432407	1.37151e+06	Grey	0.648272
89	H2O electrolysis PV Coupled	Liquid H2	Truck	Fertilizer	37	20	0	50000	0.2	0.08	1.6	3.79	1104125258	-281194196	22	0.1157	0.431	140000	82028.8	61.1648	51.6827	180.284	20967842	249.5	164383	38883384	1.1341e+06	56591.5	5.31871e+06	-8.41851e+06	37799.5	-9.34074e+06	820.273					FALSE	2.0306e+06	3.55526e+06	-1	-1	Grey	0
90	H2O electrolysis PV Coupled	Liquid H2	Truck	FCEV filling	38	20	0	50000	0.2	0.08	1.6	2.91	1110833924	601373138	21.08	0.0903	0.515	386000	86395.7	67.4171	51.8604	185.918	138010647	249.5	50000	15000000	437500	21831.2	2.16102e+06	-3.2476e+06	14581.9	-3.49414e+06	249.5	300	5000	7.70988e-19	50000	TRUE	759595	1.37151e+06	759595	1.37151e+06	Grey	0.382132
91	H2O electrolysis PV Coupled	Liquid H2	Railcar	Fertilizer	39	20	0	50000	0.2	0.08	1.6	3.75	1102761633	-269938270	21.75	0.1197	0.434	141000	81570.4	60.5219	51.6641	179.692	21074608	249.5	164383	38943445	1.13585e+06	56678.9	5.29716e+06	-8.43151e+06	37857.9	-9.38494e+06	820.273					FALSE	2.0402e+06	3.56075e+06	-1	-1	Grey	0
92	H2O electrolysis PV Coupled	Liquid H2	Railcar	FCEV filling	40	20	0	50000	0.2	0.08	1.6	2.87	1109524843	640807633	20.83	0.0978	0.524	363000	81607.8	60.7013	51.6662	179.74	139204905	249.5	50000	15000000	437500	21831.2	2.04126e+06	-3.2476e+06	14581.9	-3.6139e+06	249.5	300	5000	7.70988e-19	50000	TRUE	785630	1.37151e+06	785630	1.37151e+06	Grey	0.360955
93	CO2 Electrolysis PV Coupled	Methyl Formate	Pipeline	Fertilizer	13	40	0	50000	0.2	0.08	1.6	2.75	503711984	913264776	8.58	0.3324	0.581	119000	102307	14.4514	6.64772	92.5141	23031655	68.5	164384	43722011	1.27523e+06	17470.6	7.45905e+06	-2.51737e+06	42503.3	-9.02462e+06	225.205					FALSE	1.96187e+06	3.99767e+06	1.96187e+06	3.99767e+06	Grey	0
94	CO2 Electrolysis PV Coupled	Methyl Formate	Pipeline	FCEV filling	14	40	0	50000	0.2	0.08	1.6	3.17	1105928952	1666672	24.17	0.0982	0.505	416000	102724	14.7605	6.91136	93.4312	111561584	68.5	50000	15000000	437500	5993.75	2.56944e+06	-866203	14581.9	-3.08572e+06	68.5	300	5000	7.70988e-19	50000	TRUE	670808	1.37151e+06	670808	1.37151e+06	Grey	0.454353
95	CO2 Electrolysis PV Coupled	Methyl Formate	Railcar	Fertilizer	15	40	0	50000	0.2	0.08	1.6	2.67	454480518	1036239430	7.58	0.3475	0.592	116000	102303	14.6067	6.62211	92.4673	23251037	68.5	164384	44148117	1.28765e+06	17640.9	7.53139e+06	-2.54111e+06	42917.5	-9.11292e+06	225.205					FALSE	1.98107e+06	4.03663e+06	1.98107e+06	4.03663e+06	Grey	0
96	CO2 Electrolysis PV Coupled	Methyl Formate	Railcar	FCEV filling	16	40	0	50000	0.2	0.08	1.6	2.45	462349519	3138238412	8.83	0.3154	0.572	162000	102674	16.3822	6.64386	92.9425	153338719	68.5	50000	15000000	437500	5993.75	2.5682e+06	-863369	14581.9	-3.08696e+06	68.5	300	5000	7.70988e-19	50000	TRUE	671078	1.37151e+06	671078	1.37151e+06	Grey	0.454133
97	CO2 Electrolysis PV Coupled	Formic Acid	Pipeline	Fertilizer	17	40	0	50000	0.2	0.08	1.6	2.61	1023152324	235581969	15	0.2584	0.58	134000	6999.5	14.4594	6.65455	92.5379	25425031	273.9	164384	41236865	1.20274e+06	65886.2	481314	-8.92805e+06	40087.4	-1.50654e+07	900.493					FALSE	3.27509e+06	3.77045e+06	3.27509e+06	3.77045e+06	Green	0
98	CO2 Electrolysis PV Coupled	Formic Acid	Pipeline	FCEV filling	18	40	0	50000	0.2	0.08	1.6	2.88	1737938630	-1117480748	>25 years	0	0.572	485000	7518.03	14.8444	6.98271	93.6797	84181017	273.9	50000	15000000	437500	23966.2	188049	-3.2476e+06	14581.9	-5.46711e+06	273.9	300	5000	7.70988e-19	50000	TRUE	1.1885e+06	1.37151e+06	-1	-1	Green	0.0332526
99	CO2 Electrolysis PV Coupled	Formic Acid	Railcar	Fertilizer	19	40	0	50000	0.2	0.08	1.6	2.55	973974713	340177968	14.08	0.2718	0.603	131000	6983.9	14.6064	6.62209	92.4673	25563104	273.9	164383	41678765	1.21563e+06	66592.2	485388	-9.02372e+06	40517	-1.52279e+07	900.493					FALSE	3.31042e+06	3.81085e+06	3.31042e+06	3.81085e+06	Green	0
100	CO2 Electrolysis PV Coupled	Formic Acid	Railcar	FCEV filling	20	40	0	50000	0.2	0.08	1.6	2.07	976723655	1983711048	15.42	0.2271	0.62	262000	7355.12	16.3799	6.6437	92.942	168381726	273.9	50000	15000000	437500	23966.2	183974	-3.2476e+06	14581.9	-5.47119e+06	273.9	300	5000	7.70988e-19	50000	TRUE	1.18939e+06	1.37151e+06	1.18939e+06	1.37151e+06	Green	0.0325321
101	CO2 Electrolysis PV Coupled	Methanol	Pipeline	Fertilizer	21	40	0	50000	0.2	0.08	1.6	3.7	1427231547	-706125129	>25 years	0.0712	0.433	145000	3015.23	0.026458	0.022571	0.07848	22431890	273.9	164382	36602428	1.06757e+06	58481.5	184037	-8.16785e+06	35582.1	-1.36155e+07	900.487					FALSE	2.95988e+06	3.3467e+06	-1	-1	Green	0
102	CO2 Electrolysis PV Coupled	Methanol	Pipeline	FCEV filling	22	40	0	50000	0.2	0.08	1.6	4.48	2030243492	-1833074942	>25 years	0	0.39	224000	3351.86	0.276356	0.235755	0.819711	22015265	273.9	50000	15000000	437500	23966.2	83840.4	-3.3518e+06	14581.9	-5.57132e+06	273.9	300	5000	7.70988e-19	50000	TRUE	1.21116e+06	1.37151e+06	-1	-1	Green	0.0148254
103	CO2 Electrolysis PV Coupled	Methanol	Railcar	Fertilizer	23	40	0	50000	0.2	0.08	1.6	3.62	1377871699	-607289700	>25 years	0.0878	0.45	143000	3018.95	0.187993	0.002288	0.050325	22721118	273.9	164383	37216644	1.08549e+06	59462.9	187357	-8.30371e+06	36179.2	-1.38437e+07	900.489					FALSE	3.0095e+06	3.40286e+06	-1	-1	Green	0
104	CO2 Electrolysis PV Coupled	Methanol	Railcar	FCEV filling	24	40	0	50000	0.2	0.08	1.6	2.51	1385946628	77378207	23.6	0.0685	0.578	422000	3390.78	1.96356	0.023893	0.525644	141709692	273.9	50000	15000000	437500	23966.2	84813.9	-3.34676e+06	14581.9	-5.57035e+06	273.9	300	5000	7.70988e-19	50000	TRUE	1.21094e+06	1.37151e+06	1.21094e+06	1.37151e+06	Green	0.0149976
105	N2 Electrolysis PV Coupled	Ammonia	Pipeline	Fertilizer	25	40	0	50000	0.2	0.08	1.6	1.64	667426743	1165461510	8	0.4154	0.726	115000	29.2259	0.021691	0.018492	0.064338	28129604	249.5	164384	44208582	1.28942e+06	64341.9	2154.52	-1.00853e+07	42976.3	-1.6665e+07	820.274					FALSE	3.62282e+06	4.04216e+06	3.62282e+06	4.04216e+06	Green	0
106	N2 Electrolysis PV Coupled	Ammonia	Pipeline	FCEV filling	26	40	0	50000	0.2	0.08	1.6	2.57	1568162626	-581475413	>25 years	0.0424	0.5917	456000	305.261	0.226565	0.193148	0.672009	115403308	249.5	50000	15000000	437500	21831.2	7635.53	-3.42801e+06	14581.9	-5.64752e+06	249.5	300	5000	7.70988e-19	50000	TRUE	1.22772e+06	1.37151e+06	-1	-1	Green	0.00135018
107	N2 Electrolysis PV Coupled	Ammonia	Railcar	Fertilizer	27	40	0	50000	0.2	0.08	1.6	1.54	618821433	1295088639	7.16	0.4318	0.737	108000	8.94212	0.042679	0.000528	0.011422	28426477	249.5	164384	44555633	1.29954e+06	64847	664.384	-1.01648e+07	43313.6	-1.67973e+07	820.274					FALSE	3.65158e+06	4.07389e+06	3.65158e+06	4.07389e+06	Green	0
108	N2 Electrolysis PV Coupled	Ammonia	Railcar	FCEV filling	28	40	0	50000	0.2	0.08	1.6	1.68	927572580	2563587332	13.83	0.2755	0.662	236000	93.3996	0.445778	0.005514	0.119297	182320397	249.5	50000	15000000	437500	21831.2	2336.21	-3.42923e+06	14581.9	-5.65282e+06	249.5	300	5000	7.70988e-19	50000	TRUE	1.22887e+06	1.37151e+06	1.22887e+06	1.37151e+06	Green	0.000413111
109	H2O electrolysis PV Coupled	Gas H2	Pipeline	Fertilizer	29	40	0	50000	0.2	0.08	1.6	1.91	739801192	930791991	9.33	0.377	0.688	121000	17574.2	14.401	3.09453	58.2408	27156228	249.5	164384	43591718	1.27143e+06	63444.1	1.27748e+06	-9.43789e+06	42376.6	-1.51571e+07	820.274					FALSE	3.29501e+06	3.98576e+06	3.29501e+06	3.98576e+06	Green	0
110	H2O electrolysis PV Coupled	Gas H2	Pipeline	FCEV filling	30	40	0	50000	0.2	0.08	1.6	2.18	1339169660	385323200	22	0.1462	0.631	388000	18392	15.0081	3.61215	60.0415	148250180	249.5	50000	15000000	437500	21831.2	460039	-3.2476e+06	14581.9	-5.19512e+06	249.5	300	5000	7.70988e-19	50000	TRUE	1.12937e+06	1.37151e+06	1.12937e+06	1.37151e+06	Green	0.0813485
111	H2O electrolysis PV Coupled	Gas H2	Railcar	Fertilizer	31	40	0	50000	0.2	0.08	1.6	2.23	705023641	871010920	9.41	0.3479	0.646	119000	18415.5	13.6706	11.6568	40.5477	25560034	249.5	164384	43624438	1.27238e+06	63491.7	1.33965e+06	-9.44497e+06	42408.4	-1.51072e+07	820.274					FALSE	3.28418e+06	3.98875e+06	3.28418e+06	3.98875e+06	Green	0
112	H2O electrolysis PV Coupled	Gas H2	Railcar	FCEV filling	32	40	0	50000	0.2	0.08	1.6	5.5	776291776	-629797342	>25 years	0	0.21	491000	18417.4	13.6797	11.657	40.55	24269293	249.5	50000	15000000	437500	21831.2	460676	-3.2476e+06	14581.9	-5.19448e+06	249.5	300	5000	7.70988e-19	50000	TRUE	1.12924e+06	1.37151e+06	-1	-1	Green	0.0814611
113	H2O electrolysis PV Coupled	Formic Acid	Pipeline	Fertilizer	33	40	0	50000	0.2	0.08	1.6	3.33	922142151	102316099	16	0.2017	0.495	135000	146211	14.4594	6.65455	92.5379	21443146	249.5	164383	40846980	1.19137e+06	59449.4	9.95902e+06	638623	39708.4	-5.44072e+06	820.273					FALSE	1.18277e+06	3.7348e+06	1.18277e+06	3.7348e+06	Grey	0
114	H2O electrolysis PV Coupled	Formic Acid	Pipeline	FCEV filling	34	40	0	50000	0.2	0.08	1.6	4	1636897493	-1344618870	>25 years	0	0.447	390000	146730	14.8444	6.98271	93.6797	36706597	249.5	50000	15000000	437500	21831.2	3.67016e+06	234518	14581.9	-1.985e+06	249.5	300	5000	7.70988e-19	50000	TRUE	431521	1.37151e+06	-1	-1	Grey	0.648992
115	H2O electrolysis PV Coupled	Formic Acid	Railcar	Fertilizer	35	40	0	50000	0.2	0.08	1.6	3.27	872964541	205682600	14.83	0.215	0.505	132000	146196	14.6064	6.62209	92.4673	21581221	249.5	164383	41358563	1.20629e+06	60193.9	1.00827e+07	646621	40205.7	-5.50994e+06	820.274					FALSE	1.19781e+06	3.78157e+06	1.19781e+06	3.78157e+06	Grey	0
116	H2O electrolysis PV Coupled	Formic Acid	Railcar	FCEV filling	36	40	0	50000	0.2	0.08	1.6	2.88	875682518	1462193037	16.33	0.1703	0.516	296000	146567	16.3799	6.6437	92.942	140171914	249.5	50000	15000000	437500	21831.2	3.66609e+06	234518	14581.9	-1.98907e+06	249.5	300	5000	7.70988e-19	50000	TRUE	432407	1.37151e+06	432407	1.37151e+06	Grey	0.648272
117	H2O electrolysis PV Coupled	Liquid H2	Truck	Fertilizer	37	40	0	50000	0.2	0.08	1.6	3.61	1104125258	-262609437	20.91	0.1411	0.456	138000	82028.8	61.1648	51.6827	180.284	20967842	249.5	164383	38883384	1.1341e+06	56591.5	5.31871e+06	-8.41851e+06	37799.5	-9.34074e+06	820.273					FALSE	2.0306e+06	3.55526e+06	-1	-1	Grey	0
118	H2O electrolysis PV Coupled	Liquid H2	Truck	FCEV filling	38	40	0	50000	0.2	0.08	1.6	2.81	1110833924	643634935	20.66	0.1158	0.5353	356000	86395.7	67.4171	51.8604	185.918	138010647	249.5	50000	15000000	437500	21831.2	2.16102e+06	-3.2476e+06	14581.9	-3.49414e+06	249.5	300	5000	7.70988e-19	50000	TRUE	759595	1.37151e+06	759595	1.37151e+06	Grey	0.382132
119	H2O electrolysis PV Coupled	Liquid H2	Railcar	Fertilizer	39	40	0	50000	0.2	0.08	1.6	3.57	1102761633	-251385488	20.67	0.1452	0.4617	139000	81570.4	60.5219	51.6641	179.692	21074608	249.5	164383	38943445	1.13585e+06	56678.9	5.29716e+06	-8.43151e+06	37857.9	-9.38494e+06	820.273					FALSE	2.0402e+06	3.56075e+06	-1	-1	Grey	0
120	H2O electrolysis PV Coupled	Liquid H2	Railcar	FCEV filling	40	40	0	50000	0.2	0.08	1.6	2.77	1109524843	683173500	20.42	0.1232	0.5426	357000	81607.8	60.7013	51.6662	179.74	139204905	249.5	50000	15000000	437500	21831.2	2.04126e+06	-3.2476e+06	14581.9	-3.6139e+06	249.5	300	5000	7.70988e-19	50000	TRUE	785630	1.37151e+06	785630	1.37151e+06	Grey	0.360955
121	Biomass Gasification	Gas H2	Pipeline	Fertilizer	1	10	150	50000	0.2	0.08	1.6	4.4	335528061	518044149	9.42	0.1914	0.3549	124000	622705	20.975	9.54937	63.4985	14449023	0	164384	43345415	1.26424e+06	0	4.50092e+07	3.43544e+07	42137.2	2.86675e+07	0					FALSE	0	0	0	0	Grey	0
122	Biomass Gasification	Gas H2	Pipeline	FCEV filling	2	10	150	50000	0.2	0.08	1.6	5.23	934880333	-772018327	>25 years	0	0.2646	337000	623523	21.5821	10.067	65.2992	19112408	0	50000	15000000	437500	0	1.55962e+07	1.18886e+07	14581.9	9.94107e+06	0	300	5000	7.70988e-19	50000	TRUE	0	0	-1	-1	Grey	0
123	Biomass Gasification	Gas H2	Railcar	Fertilizer	3	10	150	50000	0.2	0.08	1.6	4.72	300750509	457705079	9.58	0.1622	0.307	125000	623546	20.2447	18.1117	45.8055	12852829	0	164384	43376085	1.26514e+06	0	4.51019e+07	3.43787e+07	42167	2.87487e+07	0					FALSE	0	0	0	0	Grey	0
124	Biomass Gasification	Gas H2	Railcar	FCEV filling	4	10	150	50000	0.2	0.08	1.6	9.49	372002449	-722335722	>25 years	0	0	N/A	623548	20.2537	18.1118	45.8077	-2624088	0		#DIV/0!	#DIV/0!	#DIV/0!	#DIV/0!	#DIV/0!	#DIV/0!	#DIV/0!	0	#DIV/0!	#NUM!	#NUM!	0	TRUE	#DIV/0!	#DIV/0!	-1	-1	Grey	#DIV/0!
125	Biomass Gasification	Formic Acid	Pipeline	Fertilizer	5	10	150	50000	0.2	0.08	1.6	4.96	559647276	-26887105	19.25	0.0964	0.2751	139000	612130	21.0335	13.1094	97.7956	13160535	0	164383	39466551	1.15111e+06	0	4.02855e+07	3.12801e+07	38366.4	2.54062e+07	0					FALSE	0	0	-1	-1	Grey	0
126	Biomass Gasification	Formic Acid	Pipeline	FCEV filling	6	10	150	50000	0.2	0.08	1.6	8.82	1274427110	-1289221598	>25 years	0	0	N/A	612649	21.4184	13.4375	98.9374	-247367	0	50000	15000000	437500	0	1.53242e+07	1.18886e+07	14581.9	9.66908e+06	0	300	5000	7.70988e-19	50000	TRUE	0	0	-1	-1	Grey	0
127	Biomass Gasification	Formic Acid	Railcar	Fertilizer	7	10	150	50000	0.2	0.08	1.6	4.91	510469666	71263371	17.17	0.1097	0.2834	138000	612114	21.1805	13.0769	97.725	13298617	0	164383	40317169	1.17592e+06	0	4.11527e+07	3.19543e+07	39193.3	2.59527e+07	0					FALSE	0	0	0	0	Grey	0
128	Biomass Gasification	Formic Acid	Railcar	FCEV filling	8	10	150	50000	0.2	0.08	1.6	4.75	513212135	478159503	20.17	0.065	0.2843	360000	612486	22.9539	13.0985	98.1997	78015938	0	50000	15000000	437500	0	1.53202e+07	1.18886e+07	14581.9	9.665e+06	0	300	5000	7.70988e-19	50000	TRUE	0	0	0	0	Grey	0
129	Biomass Gasification	Liquid H2	Truck	Fertilizer	9	10	150	50000	0.2	0.08	1.6	5.99	699852127	-567573932	>25 years	0	0.132	148000	687159	67.7389	58.1375	185.542	8250779	0	164306	29983279	874512	0	3.43568e+07	2.37639e+07	29147.5	2.30528e+07	0					FALSE	0	0	-1	-1	Grey	0
130	Biomass Gasification	Liquid H2	Truck	FCEV filling	10	10	150	50000	0.2	0.08	1.6	5.85	706560793	-626897967	>25 years	0	0.1753	320000	691526	73.9912	58.3152	191.176	13582694	0	50000	15000000	437500	0	1.72972e+07	1.18886e+07	14581.9	1.1642e+07	0	300	5000	7.70988e-19	50000	TRUE	0	0	-1	-1	Grey	0
131	Biomass Gasification	Liquid H2	Railcar	Fertilizer	11	10	150	50000	0.2	0.08	1.6	5.96	698488501	-558591306	>25 years	0	0.1363	138000	686701	67.0959	58.119	184.95	8359239	0	164320	30304794	883890	0	3.4702e+07	2.40187e+07	29460	2.32768e+07	0					FALSE	0	0	-1	-1	Grey	0
132	Biomass Gasification	Liquid H2	Railcar	FCEV filling	12	10	150	50000	0.2	0.08	1.6	5.76	705251711	-612091657	>25 years	0	0.1866	350000	686738	67.2754	58.1211	184.998	15190915	0	50000	15000000	437500	0	1.71775e+07	1.18886e+07	14581.9	1.15223e+07	0	300	5000	7.70988e-19	50000	TRUE	0	0	-1	-1	Grey	0
133	CO2 Electrolysis PV Coupled	Methyl Formate	Pipeline	Fertilizer	13	10	10	50000	0.2	0.08	1.6	2.69	397022516	1128136340	7	0.3546	0.589	114000	102307	14.4514	6.64772	92.5141	23389814	29.8	164384	44384097	1.29454e+06	7715.44	7.572e+06	-2.55549e+06	43146.9	-9.16128e+06	97.9726					FALSE	1.99158e+06	4.05821e+06	1.99158e+06	4.05821e+06	Grey	0
134	CO2 Electrolysis PV Coupled	Methyl Formate	Pipeline	FCEV filling	14	10	10	50000	0.2	0.08	1.6	3.11	999166124	355647532	22.5	0.1251	0.509	400000	102724	14.7605	6.91136	93.4312	122194894	29.8	50000	15000000	437500	2607.5	2.56944e+06	-866203	14581.9	-3.08572e+06	29.8	300	5000	7.70988e-19	50000	TRUE	670808	1.37151e+06	670808	1.37151e+06	Grey	0.454353
135	CO2 Electrolysis PV Coupled	Methyl Formate	Railcar	Fertilizer	15	10	10	50000	0.2	0.08	1.6	2.61	347789153	1255352076	6.08	0.3698	0.601	109000	102303	14.6067	6.62211	92.4673	23615436	29.8	164384	44791322	1.30641e+06	7786.22	7.64111e+06	-2.57813e+06	43542.8	-9.24569e+06	97.9726					FALSE	2.00993e+06	4.09544e+06	2.00993e+06	4.09544e+06	Grey	0
136	CO2 Electrolysis PV Coupled	Methyl Formate	Railcar	FCEV filling	16	10	10	50000	0.2	0.08	1.6	2.44	355658179	3482998075	7.08	0.3377	0.565	123000	102674	16.3822	6.64386	92.9425	154297241	29.8	50000	15000000	437500	2607.5	2.5682e+06	-863369	14581.9	-3.08696e+06	29.8	300	5000	7.70988e-19	50000	TRUE	671078	1.37151e+06	671078	1.37151e+06	Grey	0.454133
137	CO2 Electrolysis PV Coupled	Formic Acid	Pipeline	Fertilizer	17	10	10	50000	0.2	0.08	1.6	2.4	635487087	964686994	9.58	0.3393	0.625	122000	6999.5	14.4594	6.65455	92.5379	26717409	119.1	164384	43552265	1.27027e+06	30257.9	508339	-9.42935e+06	42338.2	-1.59113e+07	391.562					FALSE	3.45898e+06	3.98215e+06	3.45898e+06	3.98215e+06	Green	0
138	CO2 Electrolysis PV Coupled	Formic Acid	Pipeline	FCEV filling	18	10	10	50000	0.2	0.08	1.6	2.72	1350262854	-183091451	>25 years	0.0584	0.559	447000	7518.03	14.8444	6.98271	93.6797	128484529	119.1	50000	15000000	437500	10421.2	188049	-3.2476e+06	14581.9	-5.46711e+06	119.1	300	5000	7.70988e-19	50000	TRUE	1.1885e+06	1.37151e+06	-1	-1	Green	0.0332526
139	CO2 Electrolysis PV Coupled	Formic Acid	Railcar	Fertilizer	19	10	10	50000	0.2	0.08	1.6	2.33	586305936	1081915987	8.75	0.353	0.634	120000	6983.9	14.6064	6.62209	92.4673	26867120	119.1	164384	43922655	1.28108e+06	30515.3	511520	-9.50954e+06	42698.3	-1.60478e+07	391.562					FALSE	3.48865e+06	4.01602e+06	3.48865e+06	4.01602e+06	Green	0
140	CO2 Electrolysis PV Coupled	Formic Acid	Railcar	FCEV filling	20	10	10	50000	0.2	0.08	1.6	2.01	589044252	3349883767	10.08	0.309	0.606	170000	7355.12	16.3799	6.6437	92.942	174515920	119.1	50000	15000000	437500	10421.2	183974	-3.2476e+06	14581.9	-5.47119e+06	119.1	300	5000	7.70988e-19	50000	TRUE	1.18939e+06	1.37151e+06	1.18939e+06	1.37151e+06	Green	0.0325321
141	CO2 Electrolysis PV Coupled	Methanol	Pipeline	Fertilizer	21	10	10	50000	0.2	0.08	1.6	3.55	1039568924	-75442588	20.42	0.151	0.464	140000	3015.23	0.026458	0.022571	0.07848	23715971	119.1	164383	39669788	1.15704e+06	27560.6	199460	-8.85233e+06	38564	-1.47565e+07	391.561					FALSE	3.20793e+06	3.62716e+06	-1	-1	Green	0
142	CO2 Electrolysis PV Coupled	Methanol	Pipeline	FCEV filling	22	10	10	50000	0.2	0.08	1.6	3.43	1642507488	-1208453838	>25 years	0	0.511	534000	3351.86	0.276356	0.235755	0.819711	68533874	119.1	50000	15000000	437500	10421.2	83840.4	-3.3518e+06	14581.9	-5.57132e+06	119.1	300	5000	7.70988e-19	50000	TRUE	1.21116e+06	1.37151e+06	-1	-1	Green	0.0148254
143	CO2 Electrolysis PV Coupled	Methanol	Railcar	Fertilizer	23	10	10	50000	0.2	0.08	1.6	3.47	990208149	34573969	19	0.1677	0.475	138000	3018.95	0.187993	0.002288	0.050325	24008142	119.1	164383	40183990	1.17203e+06	27917.8	202295	-8.96578e+06	39063.9	-1.49475e+07	391.561					FALSE	3.24946e+06	3.67418e+06	3.24946e+06	3.67418e+06	Green	0
144	CO2 Electrolysis PV Coupled	Methanol	Railcar	FCEV filling	24	10	10	50000	0.2	0.08	1.6	2.5	998283062	1306575960	19.08	0.1484	0.56	352000	3390.78	1.96356	0.023893	0.525644	162813282	119.1	50000	15000000	437500	10421.2	84813.9	-3.34676e+06	14581.9	-5.57035e+06	119.1	300	5000	7.70988e-19	50000	TRUE	1.21094e+06	1.37151e+06	1.21094e+06	1.37151e+06	Green	0.0149976
145	N2 Electrolysis PV Coupled	Ammonia	Pipeline	Fertilizer	25	10	10	50000	0.2	0.08	1.6	1.54	374324864	1715609324	4.92	0.4654	0.736	96000	29.2259	0.021691	0.018492	0.064338	28847578	109.5	164384	45391049	1.32391e+06	28993.5	2212.15	-1.0355e+07	44125.8	-1.71107e+07	360					FALSE	3.71972e+06	4.15028e+06	3.71972e+06	4.15028e+06	Green	0
146	N2 Electrolysis PV Coupled	Ammonia	Pipeline	FCEV filling	26	10	10	50000	0.2	0.08	1.6	2.56	1274987375	159063900	23.75	0.0961	0.577	425000	305.261	0.226565	0.193148	0.672009	140020619	109.5	50000	15000000	437500	9581.25	7635.53	-3.42801e+06	14581.9	-5.64752e+06	109.5	300	5000	7.70988e-19	50000	TRUE	1.22772e+06	1.37151e+06	1.22772e+06	1.37151e+06	Green	0.00135018
147	N2 Electrolysis PV Coupled	Ammonia	Railcar	Fertilizer	27	10	10	50000	0.2	0.08	1.6	1.43	325718871	1847969409	4.17	0.482	0.74	90000	8.94212	0.042679	0.000528	0.011422	29146697	109.5	164384	45654991	1.3316e+06	29162.1	680.777	-1.04156e+07	44382.4	-1.72117e+07	360					FALSE	3.74168e+06	4.17441e+06	3.74168e+06	4.17441e+06	Green	0
148	N2 Electrolysis PV Coupled	Ammonia	Railcar	FCEV filling	28	10	10	50000	0.2	0.08	1.6	1.74	634470020	3448812606	10.5	0.325	0.645	186000	93.3996	0.445778	0.005514	0.119297	184322894	109.5	50000	15000000	437500	9581.25	2336.21	-3.42923e+06	14581.9	-5.65282e+06	109.5	300	5000	7.70988e-19	50000	TRUE	1.22887e+06	1.37151e+06	1.22887e+06	1.37151e+06	Green	0.000413111
149	H2O electrolysis PV Coupled	Gas H2	Pipeline	Fertilizer	29	10	10	50000	0.2	0.08	1.6	1.59	383491116	1679807251	5.08	0.4584	0.729	92000	17574.2	14.401	3.09453	58.2408	28674090	109.5	164384	45331214	1.32216e+06	28955.3	1.32846e+06	-9.8145e+06	44067.6	-1.57619e+07	360					FALSE	3.4265e+06	4.14481e+06	3.4265e+06	4.14481e+06	Green	0
150	H2O electrolysis PV Coupled	Gas H2	Pipeline	FCEV filling	30	10	10	50000	0.2	0.08	1.6	2.04	982802216	1665332970	17.33	0.2302	0.636	314000	18392	15.0081	3.61215	60.0415	169980847	109.5	50000	15000000	437500	9581.25	460039	-3.2476e+06	14581.9	-5.19512e+06	109.5	300	5000	7.70988e-19	50000	TRUE	1.12937e+06	1.37151e+06	1.12937e+06	1.37151e+06	Green	0.0813485
151	H2O electrolysis PV Coupled	Gas H2	Railcar	Fertilizer	31	10	10	50000	0.2	0.08	1.6	1.91	348713564	1622589487	4.83	0.4294	0.682	94000	18415.5	13.6706	11.6568	40.5477	27077896	109.5	164384	45446798	1.32553e+06	29029.1	1.39561e+06	-9.83952e+06	44180	-1.57383e+07	360					FALSE	3.42137e+06	4.15538e+06	3.42137e+06	4.15538e+06	Green	0
152	H2O electrolysis PV Coupled	Gas H2	Railcar	FCEV filling	32	10	10	50000	0.2	0.08	1.6	5.23	419924332	578947659	18.08	0.0196	0.208	310000	18417.4	13.6797	11.657	40.55	66000279	109.5	50000	15000000	437500	9581.25	460676	-3.2476e+06	14581.9	-5.19448e+06	109.5	300	5000	7.70988e-19	50000	TRUE	1.12924e+06	1.37151e+06	1.12924e+06	1.37151e+06	Green	0.0814611
153	H2O electrolysis PV Coupled	Formic Acid	Pipeline	Fertilizer	33	10	10	50000	0.2	0.08	1.6	3.13	565929872	769010862	10.08	0.2762	0.523	125000	146211	14.4594	6.65455	92.5379	22639493	109.5	164384	43399493	1.26582e+06	27721.4	1.05814e+07	678530	42189.7	-5.78071e+06	360					FALSE	1.25668e+06	3.96818e+06	1.25668e+06	3.96818e+06	Grey	0
154	H2O electrolysis PV Coupled	Formic Acid	Pipeline	FCEV filling	34	10	10	50000	0.2	0.08	1.6	3.56	1280674674	-630377413	>25 years	0	0.463	489000	146730	14.8444	6.98271	93.6797	87579407	109.5	50000	15000000	437500	9581.25	3.67016e+06	234518	14581.9	-1.985e+06	109.5	300	5000	7.70988e-19	50000	TRUE	431521	1.37151e+06	-1	-1	Grey	0.648992
155	H2O electrolysis PV Coupled	Formic Acid	Railcar	Fertilizer	35	10	10	50000	0.2	0.08	1.6	3.06	516748721	885988827	9	0.2899	0.528	123000	146196	14.6064	6.62209	92.4673	22789204	109.5	164384	43841104	1.2787e+06	28003.5	1.06879e+07	685434	42619	-5.84068e+06	360					FALSE	1.26971e+06	4.00856e+06	1.26971e+06	4.00856e+06	Grey	0
156	H2O electrolysis PV Coupled	Formic Acid	Railcar	FCEV filling	36	10	10	50000	0.2	0.08	1.6	2.82	519456072	2736182648	10.5	0.2459	0.506	189000	146567	16.3799	6.6437	92.942	146597309	109.5	50000	15000000	437500	9581.25	3.66609e+06	234518	14581.9	-1.98907e+06	109.5	300	5000	7.70988e-19	50000	TRUE	432407	1.37151e+06	432407	1.37151e+06	Grey	0.648272
157	H2O electrolysis PV Coupled	Liquid H2	Truck	Fertilizer	37	10	10	50000	0.2	0.08	1.6	2.8	746954594	613809707	12.33	0.2812	0.571	130000	82028.8	61.1648	51.6827	180.284	25315093	109.5	164384	42419467	1.23723e+06	27095.4	5.8024e+06	-9.18409e+06	41237	-1.01902e+07	360					FALSE	2.21526e+06	3.87858e+06	2.21526e+06	3.87858e+06	Grey	0
158	H2O electrolysis PV Coupled	Liquid H2	Truck	FCEV filling	38	10	10	50000	0.2	0.08	1.6	2.14	753663260	2566399876	13.67	0.2558	0.6	238000	86395.7	67.4171	51.8604	185.918	172805425	109.5	50000	15000000	437500	9581.25	2.16102e+06	-3.2476e+06	14581.9	-3.49414e+06	109.5	300	5000	7.70988e-19	50000	TRUE	759595	1.37151e+06	759595	1.37151e+06	Grey	0.382132
159	H2O electrolysis PV Coupled	Liquid H2	Railcar	Fertilizer	39	10	10	50000	0.2	0.08	1.6	2.76	745590968	626096052	12.25	0.2852	0.576	130000	81570.4	60.5219	51.6641	179.692	25421857	109.5	164384	42451226	1.23816e+06	27115.7	5.77429e+06	-9.19097e+06	41267.9	-1.02303e+07	360					FALSE	2.22397e+06	3.88148e+06	2.22397e+06	3.88148e+06	Grey	0
160	H2O electrolysis PV Coupled	Liquid H2	Railcar	FCEV filling	40	10	10	50000	0.2	0.08	1.6	2.1	752354178	2608730471	13.5	0.2633	0.602	240000	81607.8	60.7013	51.6662	179.74	173708801	109.5	50000	15000000	437500	9581.25	2.04126e+06	-3.2476e+06	14581.9	-3.6139e+06	109.5	300	5000	7.70988e-19	50000	TRUE	785630	1.37151e+06	785630	1.37151e+06	Grey	0.360955
161	SMR	Gas H2	Pipeline	Fertilizer	41	10	9	50000	0.2	0.08	1.6	2.07	176672213	1713100424	2.92	0.4506	0.668	75000	147410	68.5876	3.09453	177.238	24449071	0	164384	45960925	1.34053e+06	0	1.12978e+07		44679.8	-6.03001e+06	0					FALSE	1.31087e+06	4.20239e+06	1.31087e+06	4.20239e+06	Grey	0
162	SMR	Gas H2	Pipeline	FCEV filling	42	10	9	50000	0.2	0.08	1.6	2.81	776024485	1366215135	17.17	0.2198	0.545	305000	148228	69.1946	3.61215	179.038	138181653	0	50000	15000000	437500	0	3.70764e+06		14581.9	-1.94752e+06	0	300	5000	7.70988e-19	50000	TRUE	423374	1.37151e+06	423374	1.37151e+06	Grey	0.655619
163	SMR	Gas H2	Railcar	Fertilizer	43	10	9	50000	0.2	0.08	1.6	2.39	141894661	1654407077	2.5	0.4216	0.615	65000	148251	67.8572	11.6568	159.544	22852877	0	164384	46086252	1.34418e+06	0	1.13932e+07		44801.6	-5.98179e+06	0					FALSE	1.30039e+06	4.21384e+06	1.30039e+06	4.21384e+06	Grey	0
164	SMR	Gas H2	Railcar	FCEV filling	44	10	9	50000	0.2	0.08	1.6	6.04	213146601	253103796	18.67	0.008	0.114	325000	148253	67.8662	11.657	159.547	34111749	0	50000	15000000	437500	0	3.70827e+06		14581.9	-1.94689e+06	0	300	5000	7.70988e-19	50000	TRUE	423236	1.37151e+06	423236	1.37151e+06	Grey	0.655731
165	SMR	Formic Acid	Pipeline	Fertilizer	45	10	9	50000	0.2	0.08	1.6	2.56	357570490	1218850113	6.25	0.3756	0.607	108000	136835	68.646	0.034745	211.535	23479065	0	164384	44664026	1.3027e+06	0	1.01914e+07	-787593	43419	-6.64745e+06	0					FALSE	1.4451e+06	4.08381e+06	1.4451e+06	4.08381e+06	Grey	0
166	SMR	Formic Acid	Pipeline	FCEV filling	46	10	9	50000	0.2	0.08	1.6	3.25	1072325832	-18803652	24.58	0.0949	0.495	436000	137354	69.031	0.362905	212.676	109140554	0	50000	15000000	437500	0	3.43565e+06	-271992	14581.9	-2.21951e+06	0	300	5000	7.70988e-19	50000	TRUE	482503	1.37151e+06	-1	-1	Grey	0.607523
167	SMR	Formic Acid	Railcar	Fertilizer	47	10	9	50000	0.2	0.08	1.6	2.49	308392880	1340060330	5.33	0.389	0.618	105000	136820	68.793	0.002288	211.464	23617135	0	164384	45054766	1.3141e+06	0	1.02794e+07	-858863	43798.9	-6.70677e+06	0					FALSE	1.45799e+06	4.11953e+06	1.45799e+06	4.11953e+06	Grey	0
168	SMR	Formic Acid	Railcar	FCEV filling	48	10	9	50000	0.2	0.08	1.6	2.53	311110857	3488081251	6.33	0.3443	0.562	118000	137191	70.5665	0.023893	211.939	149040289	0	50000	15000000	437500	0	3.43157e+06	-276702	14581.9	-2.22359e+06	0	300	5000	7.70988e-19	50000	TRUE	483389	1.37151e+06	483389	1.37151e+06	Grey	0.606802
169	SMR	Liquid H2	Truck	Fertilizer	49	10	9	50000	0.2	0.08	1.6	3.86	540996279	406737629	12.58	0.2144	0.427	129000	211865	115.351	51.6827	299.28	18260742	0	164384	41959352	1.22381e+06	0	1.48239e+07	4.50982e+06	40789.7	-995189	0					FALSE	216346	3.83651e+06	216346	3.83651e+06	Grey	0
170	SMR	Liquid H2	Truck	FCEV filling	50	10	9	50000	0.2	0.08	1.6	3.48	547704945	1675165090	14.5	0.189	0.441	249000	216232	121.604	51.8604	304.915	122951173	0	50000	15000000	437500	0	5.40862e+06	1.70098e+06	14581.9	-246539	0	300	5000	7.70988e-19	50000	TRUE	53595.5	1.37151e+06	53595.5	1.37151e+06	Grey	0.956403
171	SMR	Liquid H2	Railcar	Fertilizer	51	10	9	50000	0.2	0.08	1.6	3.82	539632653	418871723	12.42	0.2185	0.434	130000	211406	114.709	51.6641	298.689	18367506	0	164384	42006526	1.22519e+06	0	1.48085e+07	4.42384e+06	40835.6	-1.02842e+06	0					FALSE	223569	3.84082e+06	223569	3.84082e+06	Grey	0
172	SMR	Liquid H2	Railcar	FCEV filling	52	10	9	50000	0.2	0.08	1.6	3.43	546395863	1718350097	14.33	0.1965	0.45	258000	211444	114.888	51.6662	298.737	123884458	0	50000	15000000	437500	0	5.28886e+06	1.58059e+06	14581.9	-366300	0	300	5000	7.70988e-19	50000	TRUE	79630.3	1.37151e+06	79630.3	1.37151e+06	Grey	0.935225
173	CO Purchase	Methyl Formate	Pipeline	Fertilizer	53	10	0.6	50000	0.2	0.08	1.6	11.01	264723410	-954699485	>25 years	0	0	N/A	486138	21.0254	13.1026	97.7719	-5338925	0	50000	14775000	430938	0	1.19774e+07	8.60607e+06	14363.1	6.40708e+06	0					FALSE	0	0	-1	-1	Grey	0
174	CO Purchase	Methyl Formate	Pipeline	FCEV filling	54	10	0.6	50000	0.2	0.08	1.6	13.32	866909413	-1860156641	>25 years	0	0	N/A	486554	21.3346	13.3662	98.6889	-7875828	0		#DIV/0!	#DIV/0!	#DIV/0!	#DIV/0!	#DIV/0!	#DIV/0!	#DIV/0!	0	#DIV/0!	#NUM!	#NUM!	0	TRUE	#DIV/0!	#DIV/0!	-1	-1	Grey	#DIV/0!
175	CO Purchase	Methyl Formate	Railcar	Fertilizer	55	10	0.6	50000	0.2	0.08	1.6	10.86	215491944	-887340958	>25 years	0	0	N/A	486133	21.1807	13.077	97.7251	-5182961	0	50000	14775000	430938	0	1.19773e+07	8.60634e+06	14363.1	6.40696e+06	0					FALSE	0	0	-1	-1	Grey	0
176	CO Purchase	Methyl Formate	Railcar	FCEV filling	56	10	0.6	50000	0.2	0.08	1.6	11.18	223329981	-951634055	>25 years	0	0	N/A	486505	22.9563	13.0987	98.2002	-5614541	0	50000	15000000	437500	0	1.2169e+07	8.73741e+06	14581.9	6.51382e+06	0	300	5000	7.70988e-19	50000	TRUE	0	0	-1	-1	Grey	0
177	CO Purchase	Formic Acid	Pipeline	Fertilizer	57	10	0.6	50000	0.2	0.08	1.6	9.69	261169603	-704474669	>25 years	0	0	N/A	390830	21.0335	13.1094	97.7956	-3425812	0	50000	14775000	430938	0	9.62922e+06	6.25789e+06	14363.1	4.05889e+06	0					FALSE	0	0	-1	-1	Grey	0
178	CO Purchase	Formic Acid	Pipeline	FCEV filling	58	10	0.6	50000	0.2	0.08	1.6	12.47	975918323	-1773683132	>25 years	0	0	N/A	391348	21.4184	13.4375	98.9374	-6347996	0		#DIV/0!	#DIV/0!	#DIV/0!	#DIV/0!	#DIV/0!	#DIV/0!	#DIV/0!	0	#DIV/0!	#NUM!	#NUM!	0	TRUE	#DIV/0!	#DIV/0!	-1	-1	Grey	#DIV/0!
179	CO Purchase	Formic Acid	Railcar	Fertilizer	59	10	0.6	50000	0.2	0.08	1.6	9.56	211991993	-640344310	>25 years	0	0	N/A	390814	21.1805	13.0769	97.725	-3294633	0	50000	14775000	430938	0	9.62884e+06	6.25789e+06	14363.1	4.05851e+06	0					FALSE	0	0	-1	-1	Grey	0
180	CO Purchase	Formic Acid	Railcar	FCEV filling	60	10	0.6	50000	0.2	0.08	1.6	10	214703348	-725370840	>25 years	0	0	N/A	391185	22.9539	13.0985	98.1997	-3930639	0	50000	15000000	437500	0	9.78476e+06	6.35318e+06	14581.9	4.1296e+06	0	300	5000	7.70988e-19	50000	TRUE	0	0	-1	-1	Grey	0
181	CO Purchase	Methanol	Pipeline	Fertilizer	61	10	0.6	50000	0.2	0.08	1.6	11.55	666027279	-1327549167	>25 years	0	0	N/A	386846	2.7198	3.83784	0.07848	-5069080	0	50000	14775000	430938	0	9.53106e+06	6.15972e+06	14363.1	3.96073e+06	0					FALSE	0	0	-1	-1	Grey	0
182	CO Purchase	Methanol	Pipeline	FCEV filling	62	10	0.6	50000	0.2	0.08	1.6	13.87	1269008261	-2234363077	>25 years	0	0	N/A	387182	2.9697	4.05102	0.819711	-7609244	0		#DIV/0!	#DIV/0!	#DIV/0!	#DIV/0!	#DIV/0!	#DIV/0!	#DIV/0!	0	#DIV/0!	#NUM!	#NUM!	0	TRUE	#DIV/0!	#DIV/0!	-1	-1	Grey	#DIV/0!
183	CO Purchase	Methanol	Railcar	Fertilizer	63	10	0.6	50000	0.2	0.08	1.6	11.38	616667432	-1257350763	>25 years	0	0	N/A	386849	2.88134	3.81755	0.050325	-4891712	0	50000	14775000	430938	0	9.53115e+06	6.1602e+06	14363.1	3.96082e+06	0					FALSE	0	0	-1	-1	Grey	0
184	CO Purchase	Methanol	Railcar	FCEV filling	64	10	0.6	50000	0.2	0.08	1.6	11.58	624711397	-1297888028	>25 years	0	0	N/A	387221	4.65691	3.83916	0.525644	-5137837	0	50000	15000000	437500	0	9.6856e+06	6.25403e+06	14581.9	4.03044e+06	0	300	5000	7.70988e-19	50000	TRUE	0	0	-1	-1	Grey	0
185	Biomass Gasification	Gas H2	Pipeline	Fertilizer	1	10	200	50000	0.2	0.08	1.6	5.34	336926345	143214091	14.25	0.0942	0.2243	133000	622705	20.975	9.54937	63.4985	9851920	0	164384	41331425	1.2055e+06	0	4.29179e+07	3.27582e+07	40179.3	2.73355e+07	0					FALSE	0	0	0	0	Grey	0
186	Biomass Gasification	Gas H2	Pipeline	FCEV filling	2	10	200	50000	0.2	0.08	1.6	8.35	936278618	-969495098	>25 years	0	0	N/A	623523	21.5821	10.067	65.2992	-432815	0	50000	15000000	437500	0	1.55962e+07	1.18886e+07	14581.9	9.94107e+06	0	300	5000	7.70988e-19	50000	TRUE	0	0	-1	-1	Grey	0
187	Biomass Gasification	Gas H2	Railcar	Fertilizer	3	10	200	50000	0.2	0.08	1.6	5.66	302148793	81947659	15.67	0.0651	0.1762	137000	623546	20.2447	18.1117	45.8055	8255726	0	164384	40943523	1.19419e+06	0	4.25726e+07	3.24507e+07	39802.2	2.71364e+07	0					FALSE	0	0	0	0	Grey	0
188	Biomass Gasification	Gas H2	Railcar	FCEV filling	4	10	200	50000	0.2	0.08	1.6	10.45	373400733	-904334731	>25 years	0	0	N/A	623548	20.2537	18.1118	45.8077	-4022373	0		#DIV/0!	#DIV/0!	#DIV/0!	#DIV/0!	#DIV/0!	#DIV/0!	#DIV/0!	0	#DIV/0!	#NUM!	#NUM!	0	TRUE	#DIV/0!	#DIV/0!	-1	-1	Grey	#DIV/0!
189	Biomass Gasification	Formic Acid	Pipeline	Fertilizer	5	10	200	50000	0.2	0.08	1.6	5.85	561045561	-347086542	>25 years	0	0.1526	146000	612130	21.0335	13.1094	97.7956	8562943	0	164379	34588493	1.00883e+06	0	3.53062e+07	2.74139e+07	33624.3	2.2266e+07	0					FALSE	0	0	-1	-1	Grey	0
190	Biomass Gasification	Formic Acid	Pipeline	FCEV filling	6	10	200	50000	0.2	0.08	1.6	9.78	1275825394	-1471220607	>25 years	0	0	N/A	612649	21.4184	13.4375	98.9374	-1645651	0	50000	15000000	437500	0	1.53242e+07	1.18886e+07	14581.9	9.66908e+06	0	300	5000	7.70988e-19	50000	TRUE	0	0	-1	-1	Grey	0
191	Biomass Gasification	Formic Acid	Railcar	Fertilizer	7	10	200	50000	0.2	0.08	1.6	5.81	511867951	-262033989	>25 years	0.0126	0.1587	145000	612114	21.1805	13.0769	97.725	8701342	0	164382	36093073	1.05271e+06	0	3.68411e+07	2.86064e+07	35087	2.32336e+07	0					FALSE	0	0	-1	-1	Grey	0
192	Biomass Gasification	Formic Acid	Railcar	FCEV filling	8	10	200	50000	0.2	0.08	1.6	5.71	514610419	-342552595	>25 years	0	0.1764	491000	612486	22.9539	13.0985	98.1997	29512987	0	50000	15000000	437500	0	1.53202e+07	1.18886e+07	14581.9	9.665e+06	0	300	5000	7.70988e-19	50000	TRUE	0	0	-1	-1	Grey	0
193	Biomass Gasification	Liquid H2	Truck	Fertilizer	9	10	200	50000	0.2	0.08	1.6	8.41	701250411	-764809856	>25 years	0	0	N/A	687159	67.7389	58.1375	185.542	-466161	0	50000	14775000	430938	0	1.69302e+07	1.17103e+07	14363.1	1.13598e+07	0					FALSE	0	0	-1	-1	Grey	0
194	Biomass Gasification	Liquid H2	Truck	FCEV filling	10	10	200	50000	0.2	0.08	1.6	8.66	707959077	-812265093	>25 years	0	0	N/A	691526	73.9912	58.3152	191.176	-762603	0	50000	15000000	437500	0	1.72972e+07	1.18886e+07	14581.9	1.1642e+07	0	300	5000	7.70988e-19	50000	TRUE	0	0	-1	-1	Grey	0
195	Biomass Gasification	Liquid H2	Railcar	Fertilizer	11	10	200	50000	0.2	0.08	1.6	8.37	699886785	-758017775	>25 years	0	0	N/A	686701	67.0959	58.119	184.95	-431271	0	50000	14775000	430938	0	1.69189e+07	1.17103e+07	14363.1	1.13485e+07	0					FALSE	0	0	-1	-1	Grey	0
196	Biomass Gasification	Liquid H2	Railcar	FCEV filling	12	10	200	50000	0.2	0.08	1.6	8.58	706649995	-802675944	>25 years	0	0	N/A	686738	67.2754	58.1211	184.998	-719946	0	50000	15000000	437500	0	1.71775e+07	1.18886e+07	14581.9	1.15223e+07	0	300	5000	7.70988e-19	50000	TRUE	0	0	-1	-1	Grey	0
197	CO2 Electrolysis PV Coupled	Methyl Formate	Pipeline	Fertilizer	13	10	40	50000	0.2	0.08	1.6	2.93	397378947	1029643975	7.42	0.3298	0.555	115000	102307	14.4514	6.64772	92.5141	22217988	29.8	164384	44234499	1.29017e+06	7689.43	7.54648e+06	-2.54688e+06	43001.5	-9.1304e+06	97.9726					FALSE	1.98487e+06	4.04453e+06	1.98487e+06	4.04453e+06	Grey	0
198	CO2 Electrolysis PV Coupled	Methyl Formate	Pipeline	FCEV filling	14	10	40	50000	0.2	0.08	1.6	3.37	999559234	118590485	23.75	0.0978	0.477	419000	102724	14.7605	6.91136	93.4312	109705706	29.8	50000	15000000	437500	2607.5	2.56944e+06	-866203	14581.9	-3.08572e+06	29.8	300	5000	7.70988e-19	50000	TRUE	670808	1.37151e+06	670808	1.37151e+06	Grey	0.454353
199	CO2 Electrolysis PV Coupled	Methyl Formate	Railcar	Fertilizer	15	10	40	50000	0.2	0.08	1.6	2.85	348146532	1156070892	6.42	0.345	0.565	108000	102303	14.6067	6.62211	92.4673	22440490	29.8	164384	44668522	1.30283e+06	7764.88	7.62016e+06	-2.57107e+06	43423.4	-9.22034e+06	97.9726					FALSE	2.00442e+06	4.08422e+06	2.00442e+06	4.08422e+06	Grey	0
200	CO2 Electrolysis PV Coupled	Methyl Formate	Railcar	FCEV filling	16	10	40	50000	0.2	0.08	1.6	2.68	356015546	3239699358	7.5	0.3129	0.537	141000	102674	16.3822	6.64386	92.9425	146540585	29.8	50000	15000000	437500	2607.5	2.5682e+06	-863369	14581.9	-3.08696e+06	29.8	300	5000	7.70988e-19	50000	TRUE	671078	1.37151e+06	671078	1.37151e+06	Grey	0.454133
201	CO2 Electrolysis PV Coupled	Formic Acid	Pipeline	Fertilizer	17	10	40	50000	0.2	0.08	1.6	3.35	636904484	580065529	11.83	0.2409	0.494	129000	6999.5	14.4594	6.65455	92.5379	22057475	119.1	164384	42738179	1.24653e+06	29692.3	498838	-9.25309e+06	41546.9	-1.56139e+07	391.562					FALSE	3.39433e+06	3.90772e+06	3.39433e+06	3.90772e+06	Green	0
202	CO2 Electrolysis PV Coupled	Formic Acid	Pipeline	FCEV filling	18	10	40	50000	0.2	0.08	1.6	3.75	1351685520	-868228641	>25 years	0	0.449	514000	7518.03	14.8444	6.98271	93.6797	72213035	119.1	50000	15000000	437500	10421.2	188049	-3.2476e+06	14581.9	-5.46711e+06	119.1	300	5000	7.70988e-19	50000	TRUE	1.1885e+06	1.37151e+06	-1	-1	Green	0.0332526
203	CO2 Electrolysis PV Coupled	Formic Acid	Railcar	Fertilizer	19	10	40	50000	0.2	0.08	1.6	3.28	587725103	693387781	10.75	0.2544	0.502	125000	6983.9	14.6064	6.62209	92.4673	22201366	119.1	164384	43203814	1.26011e+06	30015.8	503149	-9.3539e+06	41999.5	-1.57851e+07	391.562					FALSE	3.43155e+06	3.95029e+06	3.43155e+06	3.95029e+06	Green	0
204	CO2 Electrolysis PV Coupled	Formic Acid	Railcar	FCEV filling	20	10	40	50000	0.2	0.08	1.6	2.98	590468731	2340227736	12.42	0.21	0.487	213000	7355.12	16.3799	6.6437	92.942	143268542	119.1	50000	15000000	437500	10421.2	183974	-3.2476e+06	14581.9	-5.47119e+06	119.1	300	5000	7.70988e-19	50000	TRUE	1.18939e+06	1.37151e+06	1.18939e+06	1.37151e+06	Green	0.0325321
205	CO2 Electrolysis PV Coupled	Methanol	Pipeline	Fertilizer	21	10	40	50000	0.2	0.08	1.6	4.46	1040985014	-412384833	>25 years	0.0527	0.338	144000	3015.23	0.026458	0.022571	0.07848	19060232	119.1	164383	37642568	1.09791e+06	26152.2	189267	-8.39995e+06	36593.3	-1.40024e+07	391.56					FALSE	3.044e+06	3.44181e+06	-1	-1	Green	0
206	CO2 Electrolysis PV Coupled	Methanol	Pipeline	FCEV filling	22	10	40	50000	0.2	0.08	1.6	5.37	1643960268	-1536610239	>25 years	0	0.26	197000	3351.86	0.276356	0.235755	0.819711	15423769	119.1	50000	15000000	437500	10421.2	83840.4	-3.3518e+06	14581.9	-5.57132e+06	119.1	300	5000	7.70988e-19	50000	TRUE	1.21116e+06	1.37151e+06	-1	-1	Green	0.0148254
207	CO2 Electrolysis PV Coupled	Methanol	Railcar	Fertilizer	23	10	40	50000	0.2	0.08	1.6	4.38	991624702	-309795343	>25 years	0.0693	0.35	143000	3018.95	0.187993	0.002288	0.050325	19350920	119.1	164383	38330417	1.11797e+06	26630.1	192964	-8.55221e+06	37262	-1.4258e+07	391.561					FALSE	3.09957e+06	3.5047e+06	-1	-1	Green	0
208	CO2 Electrolysis PV Coupled	Methanol	Railcar	FCEV filling	24	10	40	50000	0.2	0.08	1.6	3.43	999699623	349687388	22.83	0.05	0.451	415000	3390.78	1.96356	0.023893	0.525644	124466466	119.1	50000	15000000	437500	10421.2	84813.9	-3.34676e+06	14581.9	-5.57035e+06	119.1	300	5000	7.70988e-19	50000	TRUE	1.21094e+06	1.37151e+06	1.21094e+06	1.37151e+06	Green	0.0149976
209	N2 Electrolysis PV Coupled	Ammonia	Pipeline	Fertilizer	25	10	40	50000	0.2	0.08	1.6	2.42	375614895	1357380783	5.67	0.3759	0.612	105000	29.2259	0.021691	0.018492	0.064338	24606378	109.5	164384	45127462	1.31622e+06	28825.2	2199.3	-1.02949e+07	43869.5	-1.70113e+07	360					FALSE	3.69812e+06	4.12618e+06	3.69812e+06	4.12618e+06	Green	0
210	N2 Electrolysis PV Coupled	Ammonia	Pipeline	FCEV filling	26	10	40	50000	0.2	0.08	1.6	3.47	1276314093	-560079952	>25 years	0.0039	0.473	477000	305.261	0.226565	0.193148	0.672009	92745895	109.5	50000	15000000	437500	9581.25	7635.53	-3.42801e+06	14581.9	-5.64752e+06	109.5	300	5000	7.70988e-19	50000	TRUE	1.22772e+06	1.37151e+06	-1	-1	Green	0.00135018
211	N2 Electrolysis PV Coupled	Ammonia	Railcar	Fertilizer	27	10	40	50000	0.2	0.08	1.6	2.31	327009244	1490852601	4.83	0.3925	0.628	95000	8.94212	0.042679	0.000528	0.011422	24904375	109.5	164384	45465793	1.32609e+06	29041.3	677.956	-1.03725e+07	44198.4	-1.71404e+07	360					FALSE	3.72618e+06	4.15711e+06	3.72618e+06	4.15711e+06	Green	0
212	N2 Electrolysis PV Coupled	Ammonia	Railcar	FCEV filling	28	10	40	50000	0.2	0.08	1.6	2.62	635760392	2531605629	12.58	0.2354	0.533	216000	93.3996	0.445778	0.005514	0.119297	155956330	109.5	50000	15000000	437500	9581.25	2336.21	-3.42923e+06	14581.9	-5.65282e+06	109.5	300	5000	7.70988e-19	50000	TRUE	1.22887e+06	1.37151e+06	1.22887e+06	1.37151e+06	Green	0.000413111
213	H2O electrolysis PV Coupled	Gas H2	Pipeline	Fertilizer	29	10	40	50000	0.2	0.08	1.6	2.51	384831475	1307458148	5.92	0.3653	0.606	105000	17574.2	14.401	3.09453	58.2408	24267430	109.5	164384	45037412	1.31359e+06	28767.6	1.31985e+06	-9.75089e+06	43782	-1.56597e+07	360					FALSE	3.40429e+06	4.11795e+06	3.40429e+06	4.11795e+06	Green	0
214	H2O electrolysis PV Coupled	Gas H2	Pipeline	FCEV filling	30	10	40	50000	0.2	0.08	1.6	2.95	984171259	715997905	20.58	0.1351	0.52	380000	18392	15.0081	3.61215	60.0415	134250080	109.5	50000	15000000	437500	9581.25	460039	-3.2476e+06	14581.9	-5.19512e+06	109.5	300	5000	7.70988e-19	50000	TRUE	1.12937e+06	1.37151e+06	1.12937e+06	1.37151e+06	Green	0.0813485
215	H2O electrolysis PV Coupled	Gas H2	Railcar	Fertilizer	31	10	40	50000	0.2	0.08	1.6	2.83	350053923	1250349222	5.75	0.3363	0.559	103000	18415.5	13.6706	11.6568	40.5477	22671237	109.5	164384	45165190	1.31732e+06	28849.3	1.38696e+06	-9.77855e+06	43906.2	-1.56408e+07	360					FALSE	3.40017e+06	4.12963e+06	3.40017e+06	4.12963e+06	Green	0
216	H2O electrolysis PV Coupled	Gas H2	Railcar	FCEV filling	32	10	40	50000	0.2	0.08	1.6	6.16	421293375	-348061500	>25 years	0	0.113	472000	18417.4	13.6797	11.657	40.55	19513964	109.5	50000	15000000	437500	9581.25	460676	-3.2476e+06	14581.9	-5.19448e+06	109.5	300	5000	7.70988e-19	50000	TRUE	1.12924e+06	1.37151e+06	-1	-1	Green	0.0814611
217	H2O electrolysis PV Coupled	Formic Acid	Pipeline	Fertilizer	33	10	40	50000	0.2	0.08	1.6	4	567221332	419461435	12.67	0.1865	0.405	131000	146211	14.4594	6.65455	92.5379	18393595	109.5	164384	42461481	1.23846e+06	27122.3	1.03527e+07	663865	41277.9	-5.65577e+06	360					FALSE	1.22952e+06	3.88242e+06	1.22952e+06	3.88242e+06	Grey	0
218	H2O electrolysis PV Coupled	Formic Acid	Pipeline	FCEV filling	34	10	40	50000	0.2	0.08	1.6	4.78	1281971404	-1092860415	>25 years	0	0.333	368000	146730	14.8444	6.98271	93.6797	28018543	109.5	50000	15000000	437500	9581.25	3.67016e+06	234518	14581.9	-1.985e+06	109.5	300	5000	7.70988e-19	50000	TRUE	431521	1.37151e+06	-1	-1	Grey	0.648992
219	H2O electrolysis PV Coupled	Formic Acid	Railcar	Fertilizer	35	10	40	50000	0.2	0.08	1.6	3.93	518041951	532143266	11.33	0.2001	0.414	128000	146196	14.6064	6.62209	92.4673	18537487	109.5	164384	43028054	1.25498e+06	27484.2	1.04897e+07	672723	41828.6	-5.73236e+06	360					FALSE	1.24616e+06	3.93422e+06	1.24616e+06	3.93422e+06	Grey	0
220	H2O electrolysis PV Coupled	Formic Acid	Railcar	FCEV filling	36	10	40	50000	0.2	0.08	1.6	3.7	520754615	1809315425	13.17	0.1558	0.4	234000	146567	16.3799	6.6437	92.942	118004431	109.5	50000	15000000	437500	9581.25	3.66609e+06	234518	14581.9	-1.98907e+06	109.5	300	5000	7.70988e-19	50000	TRUE	432407	1.37151e+06	432407	1.37151e+06	Grey	0.648272
221	H2O electrolysis PV Coupled	Liquid H2	Truck	Fertilizer	37	10	40	50000	0.2	0.08	1.6	3.98	748725247	150623813	16.75	0.1582	0.402	138000	82028.8	61.1648	51.6827	180.284	19493759	109.5	164384	40873656	1.19215e+06	26108	5.59095e+06	-8.84941e+06	39734.3	-9.81885e+06	360					FALSE	2.13453e+06	3.73724e+06	2.13453e+06	3.73724e+06	Grey	0
222	H2O electrolysis PV Coupled	Liquid H2	Truck	FCEV filling	38	10	40	50000	0.2	0.08	1.6	3.33	755433913	1286799294	17.58	0.1329	0.453	308000	86395.7	67.4171	51.8604	185.918	131742375	109.5	50000	15000000	437500	9581.25	2.16102e+06	-3.2476e+06	14581.9	-3.49414e+06	109.5	300	5000	7.70988e-19	50000	TRUE	759595	1.37151e+06	759595	1.37151e+06	Grey	0.382132
223	H2O electrolysis PV Coupled	Liquid H2	Railcar	Fertilizer	39	10	40	50000	0.2	0.08	1.6	3.94	747361621	162493108	16.5	0.1622	0.412	136000	81570.4	60.5219	51.6641	179.692	19600523	109.5	164384	40924737	1.19364e+06	26140.7	5.56666e+06	-8.86047e+06	39784	-9.86241e+06	360					FALSE	2.144e+06	3.74191e+06	2.144e+06	3.74191e+06	Grey	0
224	H2O electrolysis PV Coupled	Liquid H2	Railcar	FCEV filling	40	10	40	50000	0.2	0.08	1.6	3.29	754124831	1329005282	17.33	0.1403	0.46	303000	81607.8	60.7013	51.6662	179.74	132741482	109.5	50000	15000000	437500	9581.25	2.04126e+06	-3.2476e+06	14581.9	-3.6139e+06	109.5	300	5000	7.70988e-19	50000	TRUE	785630	1.37151e+06	785630	1.37151e+06	Grey	0.360955
225	SMR	Gas H2	Pipeline	Fertilizer	41	10	11.5	50000	0.2	0.08	1.6	2.33	177052139	1607648786	3.08	0.4242	0.633	78000	147410	68.5876	3.09453	177.238	23199998	0	164384	45922445	1.3394e+06	0	1.12883e+07		44642.4	-6.02496e+06	0					FALSE	1.30977e+06	4.19887e+06	1.30977e+06	4.19887e+06	Grey	0
226	SMR	Gas H2	Pipeline	FCEV filling	42	10	11.5	50000	0.2	0.08	1.6	3.07	776404412	1100118586	18.17	0.1934	0.513	325000	148228	69.1946	3.61215	179.038	128476779	0	50000	15000000	437500	0	3.70764e+06		14581.9	-1.94752e+06	0	300	5000	7.70988e-19	50000	TRUE	423374	1.37151e+06	423374	1.37151e+06	Grey	0.655619
227	SMR	Gas H2	Railcar	Fertilizer	43	10	11.5	50000	0.2	0.08	1.6	2.65	142274588	1549516569	2.67	0.3952	0.582	69000	148251	67.8572	11.6568	159.544	21603804	0	164384	46062072	1.34348e+06	0	1.13872e+07		44778.1	-5.97865e+06	0					FALSE	1.29971e+06	4.21163e+06	1.29971e+06	4.21163e+06	Grey	0
228	SMR	Gas H2	Railcar	FCEV filling	44	10	11.5	50000	0.2	0.08	1.6	6.29	213526527	-30722717	24.33	0	0.087	406000	148253	67.8662	11.657	159.547	22257342	0	50000	15000000	437500	0	3.70827e+06		14581.9	-1.94689e+06	0	300	5000	7.70988e-19	50000	TRUE	423236	1.37151e+06	-1	-1	Grey	0.655731
229	SMR	Formic Acid	Pipeline	Fertilizer	45	10	11.5	50000	0.2	0.08	1.6	2.82	357950416	1113393075	6.33	0.3492	0.573	113000	136835	68.646	0.034745	211.535	22229992	0	164384	44521714	1.29855e+06	0	1.01589e+07	-785083	43280.7	-6.62627e+06	0					FALSE	1.44049e+06	4.07079e+06	1.44049e+06	4.07079e+06	Grey	0
230	SMR	Formic Acid	Pipeline	FCEV filling	46	10	11.5	50000	0.2	0.08	1.6	3.52	1072705758	-224277637	>25 years	0.0685	0.464	448000	137354	69.031	0.362905	212.676	95634153	0	50000	15000000	437500	0	3.43565e+06	-271992	14581.9	-2.21951e+06	0	300	5000	7.70988e-19	50000	TRUE	482503	1.37151e+06	-1	-1	Grey	0.607523
231	SMR	Formic Acid	Railcar	Fertilizer	47	10	11.5	50000	0.2	0.08	1.6	2.75	308772806	1234112983	5.67	0.3626	0.579	104000	136820	68.793	0.002288	211.464	22368062	0	164384	44940392	1.31076e+06	0	1.02533e+07	-856683	43687.7	-6.68975e+06	0					FALSE	1.45429e+06	4.10907e+06	1.45429e+06	4.10907e+06	Grey	0
232	SMR	Formic Acid	Railcar	FCEV filling	48	10	11.5	50000	0.2	0.08	1.6	2.79	311490783	3229926984	6.67	0.3179	0.526	120000	137191	70.5665	0.023893	211.939	140797723	0	50000	15000000	437500	0	3.43157e+06	-276702	14581.9	-2.22359e+06	0	300	5000	7.70988e-19	50000	TRUE	483389	1.37151e+06	483389	1.37151e+06	Grey	0.606802
233	SMR	Liquid H2	Truck	Fertilizer	49	10	11.5	50000	0.2	0.08	1.6	4.11	541376205	307646574	13.58	0.188	0.394	134000	211865	115.351	51.6827	299.28	17011668	0	164384	41544430	1.21171e+06	0	1.46773e+07	4.46522e+06	40386.4	-985348	0					FALSE	214206	3.79857e+06	214206	3.79857e+06	Grey	0
234	SMR	Liquid H2	Truck	FCEV filling	50	10	11.5	50000	0.2	0.08	1.6	3.74	548084871	1400567572	15.58	0.1626	0.411	275000	216232	121.604	51.8604	304.915	114133410	0	50000	15000000	437500	0	5.40862e+06	1.70098e+06	14581.9	-246539	0	300	5000	7.70988e-19	50000	TRUE	53595.5	1.37151e+06	53595.5	1.37151e+06	Grey	0.956403
235	SMR	Liquid H2	Railcar	Fertilizer	51	10	11.5	50000	0.2	0.08	1.6	4.08	540012579	319708490	13.42	0.1921	0.399	133000	211406	114.709	51.6641	298.689	17118432	0	164384	41597830	1.21327e+06	0	1.46644e+07	4.3808e+06	40438.3	-1.01841e+06	0					FALSE	221394	3.80345e+06	221394	3.80345e+06	Grey	0
236	SMR	Liquid H2	Railcar	FCEV filling	52	10	11.5	50000	0.2	0.08	1.6	3.69	546775790	1443659694	15.33	0.1701	0.42	275000	211444	114.888	51.6662	298.737	115088196	0	50000	15000000	437500	0	5.28886e+06	1.58059e+06	14581.9	-366300	0	300	5000	7.70988e-19	50000	TRUE	79630.3	1.37151e+06	79630.3	1.37151e+06	Grey	0.935225
237	CO Purchase	Methyl Formate	Pipeline	Fertilizer	53	10	0.9	50000	0.2	0.08	1.6	15.17	270789932	-1744310748	>25 years	0	0	N/A	486138	21.0254	13.1026	97.7719	-11405448	0	50000	14775000	430938	0	1.19774e+07	8.60607e+06	14363.1	6.40708e+06	0					FALSE	0	0	-1	-1	Grey	0
238	CO Purchase	Methyl Formate	Pipeline	FCEV filling	54	10	0.9	50000	0.2	0.08	1.6	17.49	872975935	-2649767904	>25 years	0	0	N/A	486554	21.3346	13.3662	98.6889	-13942350	0		#DIV/0!	#DIV/0!	#DIV/0!	#DIV/0!	#DIV/0!	#DIV/0!	#DIV/0!	0	#DIV/0!	#NUM!	#NUM!	0	TRUE	#DIV/0!	#DIV/0!	-1	-1	Grey	#DIV/0!
239	CO Purchase	Methyl Formate	Railcar	Fertilizer	55	10	0.9	50000	0.2	0.08	1.6	15.02	221558466	-1676952220	>25 years	0	0	N/A	486133	21.1807	13.077	97.7251	-11249483	0	50000	14775000	430938	0	1.19773e+07	8.60634e+06	14363.1	6.40696e+06	0					FALSE	0	0	-1	-1	Grey	0
240	CO Purchase	Methyl Formate	Railcar	FCEV filling	56	10	0.9	50000	0.2	0.08	1.6	15.34	229396503	-1741245318	>25 years	0	0	N/A	486505	22.9563	13.0987	98.2002	-11681063	0	50000	15000000	437500	0	1.2169e+07	8.73741e+06	14581.9	6.51382e+06	0	300	5000	7.70988e-19	50000	TRUE	0	0	-1	-1	Grey	0
241	CO Purchase	Formic Acid	Pipeline	Fertilizer	57	10	0.9	50000	0.2	0.08	1.6	13.86	267236125	-1494085932	>25 years	0	0	N/A	390830	21.0335	13.1094	97.7956	-9492334	0	50000	14775000	430938	0	9.62922e+06	6.25789e+06	14363.1	4.05889e+06	0					FALSE	0	0	-1	-1	Grey	0
242	CO Purchase	Formic Acid	Pipeline	FCEV filling	58	10	0.9	50000	0.2	0.08	1.6	16.63	981984845	-2563294395	>25 years	0	0	N/A	391348	21.4184	13.4375	98.9374	-12414518	0		#DIV/0!	#DIV/0!	#DIV/0!	#DIV/0!	#DIV/0!	#DIV/0!	#DIV/0!	0	#DIV/0!	#NUM!	#NUM!	0	TRUE	#DIV/0!	#DIV/0!	-1	-1	Grey	#DIV/0!
243	CO Purchase	Formic Acid	Railcar	Fertilizer	59	10	0.9	50000	0.2	0.08	1.6	13.73	218058515	-1429955573	>25 years	0	0	N/A	390814	21.1805	13.0769	97.725	-9361155	0	50000	14775000	430938	0	9.62884e+06	6.25789e+06	14363.1	4.05851e+06	0					FALSE	0	0	-1	-1	Grey	0
244	CO Purchase	Formic Acid	Railcar	FCEV filling	60	10	0.9	50000	0.2	0.08	1.6	14.17	220769870	-1514982103	>25 years	0	0	N/A	391185	22.9539	13.0985	98.1997	-9997161	0	50000	15000000	437500	0	9.78476e+06	6.35318e+06	14581.9	4.1296e+06	0	300	5000	7.70988e-19	50000	TRUE	0	0	-1	-1	Grey	0
245	CO Purchase	Methanol	Pipeline	Fertilizer	61	10	0.9	50000	0.2	0.08	1.6	15.71	672093802	-2117160430	>25 years	0	0	N/A	386846	2.7198	3.83784	0.07848	-11135602	0	50000	14775000	430938	0	9.53106e+06	6.15972e+06	14363.1	3.96073e+06	0					FALSE	0	0	-1	-1	Grey	0
246	CO Purchase	Methanol	Pipeline	FCEV filling	62	10	0.9	50000	0.2	0.08	1.6	18.03	1275074783	-3023974340	>25 years	0	0	N/A	387182	2.9697	4.05102	0.819711	-13675766	0		#DIV/0!	#DIV/0!	#DIV/0!	#DIV/0!	#DIV/0!	#DIV/0!	#DIV/0!	0	#DIV/0!	#NUM!	#NUM!	0	TRUE	#DIV/0!	#DIV/0!	-1	-1	Grey	#DIV/0!
247	CO Purchase	Methanol	Railcar	Fertilizer	63	10	0.9	50000	0.2	0.08	1.6	15.55	622733954	-2046962026	>25 years	0	0	N/A	386849	2.88134	3.81755	0.050325	-10958234	0	50000	14775000	430938	0	9.53115e+06	6.1602e+06	14363.1	3.96082e+06	0					FALSE	0	0	-1	-1	Grey	0
248	CO Purchase	Methanol	Railcar	FCEV filling	64	10	0.9	50000	0.2	0.08	1.6	15.74	630777919	-2087499291	>25 years	0	0	N/A	387221	4.65691	3.83916	0.525644	-11204359	0	50000	15000000	437500	0	9.6856e+06	6.25403e+06	14581.9	4.03044e+06	0	300	5000	7.70988e-19	50000	TRUE	0	0	-1	-1	Grey	0
249	Biomass Gasification	Gas H2	Pipeline	Fertilizer	1	10	100	25000	0.2	0.08	1.6	3.55	227165395	575577751	10.83	0.2251	0.4646	97000	311352	10.4875	4.77468	31.7493	18875898	0	164301	37352333	1.08944e+06	0	3.87861e+07	2.96044e+07	36311.1	2.47039e+07	0					FALSE	0	0	0	0	Grey	0
250	Biomass Gasification	Gas H2	Pipeline	FCEV filling	2	10	100	25000	0.2	0.08	1.6	8.63	737963380	-719262259	>25 years	0	0	N/A	311761	10.7911	5.0335	32.6496	-9139	0	25000	7500000	218750	0	7.79811e+06	5.94429e+06	7290.94	4.97053e+06	0	300	2500	7.70988e-19	25000	TRUE	0	0	-1	-1	Grey	0
251	Biomass Gasification	Gas H2	Railcar	Fertilizer	3	10	100	25000	0.2	0.08	1.6	3.82	190820958	601363453	9.83	0.2098	0.4265	92000	311773	10.1223	9.05584	22.9027	17469824	0	164318	38231202	1.11508e+06	0	3.97523e+07	3.0301e+07	37165.5	2.53388e+07	0					FALSE	0	0	0	0	Grey	0
252	Biomass Gasification	Gas H2	Railcar	FCEV filling	4	10	100	25000	0.2	0.08	1.6	9.02	226717958	-345663747	>25 years	0	0	N/A	311774	10.1269	9.05591	22.9039	-868313	0		#DIV/0!	#DIV/0!	#DIV/0!	#DIV/0!	#DIV/0!	#DIV/0!	#DIV/0!	0	#DIV/0!	#NUM!	#NUM!	0	TRUE	#DIV/0!	#DIV/0!	-1	-1	Grey	#DIV/0!
253	Biomass Gasification	Formic Acid	Pipeline	Fertilizer	5	10	100	25000	0.2	0.08	1.6	4.41	445459628	-163822541	>25 years	0.0321	0.3382	120000	306065	10.5167	6.55469	48.8978	16376443	0	162988	26375556	769287	0	2.69229e+07	2.09045e+07	25640.3	1.6979e+07	0					FALSE	0	0	-1	-1	Grey	0
254	Biomass Gasification	Formic Acid	Pipeline	FCEV filling	6	10	100	25000	0.2	0.08	1.6	11.53	1068712782	-1218557642	>25 years	0	0	N/A	306324	10.7092	6.71877	49.4687	-1270300	0	25000	7500000	218750	0	7.66212e+06	5.94429e+06	7290.94	4.83454e+06	0	300	2500	7.70988e-19	25000	TRUE	0	0	-1	-1	Grey	0
255	Biomass Gasification	Formic Acid	Railcar	Fertilizer	7	10	100	25000	0.2	0.08	1.6	4.33	401493765	-54367131	22.42	0.0598	0.3496	117000	306057	10.5902	6.53847	48.8625	16781429	0	163606	28684421	836629	0	2.92789e+07	2.27345e+07	27884.8	1.84646e+07	0	3923.08	97.725	4.90817e+07	4.90724e+07	FALSE	0	0	-1	-1	Grey	0
256	Biomass Gasification	Formic Acid	Railcar	FCEV filling	8	10	100	25000	0.2	0.08	1.6	4.32	402814519	-35983575	>25 years	0.0151	0.3518	260000	306243	11.477	6.54927	49.0999	46517860	0	25000	7500000	218750	0	7.66008e+06	5.9443e+06	7290.94	4.8325e+06	0	300	2500	7.70988e-19	25000	TRUE	0	0	-1	-1	Grey	0
257	Biomass Gasification	Liquid H2	Truck	Fertilizer	9	10	100	25000	0.2	0.08	1.6	5.07	423526861	-285452910	>25 years	0	0.2506	122000	343580	33.8695	29.0688	92.7707	12146727	0	159512	21314044	621660	0	2.4423e+07	1.68929e+07	20719.9	1.63874e+07	0					FALSE	0	0	-1	-1	Grey	0
258	Biomass Gasification	Liquid H2	Truck	FCEV filling	10	10	100	25000	0.2	0.08	1.6	5.05	427600432	-324195200	>25 years	0	0.2839	281000	345763	36.9956	29.1576	95.5878	18320506	0	25000	7500000	218750	0	8.64861e+06	5.9443e+06	7290.94	5.82103e+06	0	300	2500	7.70988e-19	25000	TRUE	0	0	-1	-1	Grey	0
259	Biomass Gasification	Liquid H2	Railcar	Fertilizer	11	10	100	25000	0.2	0.08	1.6	5.05	423512132	-280801704	>25 years	0	0.2546	122000	343350	33.548	29.0595	92.475	12268749	0	159752	21519166	627642	0	2.46416e+07	1.70555e+07	20919.3	1.65287e+07	0	17435.7	184.95	4.79256e+07	4.78835e+07	FALSE	0	0	-1	-1	Grey	0
260	Biomass Gasification	Liquid H2	Railcar	FCEV filling	12	10	100	25000	0.2	0.08	1.6	4.98	426286750	-310542044	>25 years	0	0.2902	280000	343369	33.6377	29.0605	92.499	19813005	0	25000	7500000	218750	0	8.58872e+06	5.94429e+06	7290.94	5.76114e+06	0	300	2500	7.70988e-19	25000	TRUE	0	0	-1	-1	Grey	0
261	CO2 Electrolysis PV Coupled	Methyl Formate	Pipeline	Fertilizer	13	10	0	25000	0.2	0.08	1.6	3.27	382854067	333723336	15.67	0.1797	0.4962	109000	51153.7	7.22569	3.32386	46.2571	22190447	34.25	164189	34071728	993759	13614.5	5.81269e+06	-1.96174e+06	33122	-7.03271e+06	224.939					FALSE	1.52885e+06	3.11531e+06	1.52885e+06	3.11531e+06	Grey	0
262	CO2 Electrolysis PV Coupled	Methyl Formate	Pipeline	FCEV filling	14	10	0	25000	0.2	0.08	1.6	7.64	895312118	-871656049	>25 years	0	0	N/A	51362	7.38025	3.45568	46.7156	1310888	34.25	6.88949e+06	8.71035e+12	2.54052e+11	3.48051e+09	1.49205e+12	-5.02995e+11	8.46755e+09	-1.79185e+12	9438.6	300	2093.17	0.014801	200000	TRUE	3.89532e+11	7.96422e+11	-1	-1	Grey	0.454353
263	CO2 Electrolysis PV Coupled	Methyl Formate	Railcar	Fertilizer	15	10	0	25000	0.2	0.08	1.6	3.15	338757291	491425392	13.58	0.2093	0.5119	105000	51151.3	7.30332	3.31105	46.2337	22597694	34.25	164257	35716017	1.04172e+06	14271.5	6.09293e+06	-2.05577e+06	34720.4	-7.37239e+06	225.032	1986.63	92.4673	4.92771e+07	4.92725e+07	FALSE	1.60269e+06	3.26565e+06	1.60269e+06	3.26565e+06	Grey	0
264	CO2 Electrolysis PV Coupled	Methyl Formate	Railcar	FCEV filling	16	10	0	25000	0.2	0.08	1.6	2.97	343149064	1166560749	15.75	0.1767	0.5095	182000	51337.2	8.19111	3.32193	46.4713	94499438	34.25	25000	7500000	218750	2996.88	1.2841e+06	-431684	7290.94	-1.54348e+06	34.25	300	2500	7.70988e-19	25000	TRUE	335539	685754	335539	685754	Grey	0.454133
265	CO2 Electrolysis PV Coupled	Formic Acid	Pipeline	Fertilizer	17	10	0	25000	0.2	0.08	1.6	3.23	657536877	-117947558	23	0.0297	0.4875	118000	3499.75	7.22971	3.32727	46.269	24974733	136.95	163768	29566624	862360	47240.1	345100	-6.40137e+06	28742.5	-1.08018e+07	897.123					FALSE	2.34822e+06	2.70339e+06	-1	-1	Green	0
266	CO2 Electrolysis PV Coupled	Formic Acid	Pipeline	FCEV filling	18	10	0	25000	0.2	0.08	1.6	11.57	1280794215	-1341839838	>25 years	0	0	N/A	3759.01	7.42219	3.49135	46.8398	-446929	136.95	25000	7500000	218750	11983.1	94024.6	-1.6238e+06	7290.94	-2.73356e+06	136.95	300	2500	7.70988e-19	25000	TRUE	594251	685754	-1	-1	Green	0.0332526
267	CO2 Electrolysis PV Coupled	Formic Acid	Railcar	Fertilizer	19	10	0	25000	0.2	0.08	1.6	3.15	613571014	7065300	21.08	0.0575	0.4976	117000	3491.95	7.30321	3.31105	46.2336	25330767	136.95	163966	31078487	906456	49655.7	361938	-6.72869e+06	30212.2	-1.1355e+07	898.204					FALSE	2.46847e+06	2.84163e+06	2.46847e+06	2.84163e+06	Green	0
268	CO2 Electrolysis PV Coupled	Formic Acid	Railcar	FCEV filling	20	10	0	25000	0.2	0.08	1.6	2.82	614895953	280878726	22.67	0.0128	0.5276	240000	3677.56	8.18994	3.32185	46.471	88765303	136.95	25000	7500000	218750	11983.1	91987.2	-1.6238e+06	7290.94	-2.73559e+06	136.95	300	2500	7.70988e-19	25000	TRUE	594694	685754	594694	685754	Green	0.0325321
269	CO2 Electrolysis PV Coupled	Methanol	Pipeline	Fertilizer	21	10	0	25000	0.2	0.08	1.6	4.11	898313266	-746602112	>25 years	0	0.3729	127000	1507.61	0.013229	0.011286	0.03924	20252325	136.95	155318	18821184	548951	30071.5	94633.1	-4.19995e+06	18296.5	-7.00115e+06	850.832					FALSE	1.52199e+06	1.72089e+06	-1	-1	Green	0
270	CO2 Electrolysis PV Coupled	Methanol	Pipeline	FCEV filling	22	10	0	25000	0.2	0.08	1.6	12.83	1411168006	-1547227967	>25 years	0	0	N/A	1675.93	0.138178	0.117877	0.409855	-1012611	136.95	25000	7500000	218750	11983.1	41920.2	-1.6759e+06	7290.94	-2.78566e+06	136.95	300	2500	7.70988e-19	25000	TRUE	605578	685754	-1	-1	Green	0.0148254
271	CO2 Electrolysis PV Coupled	Methanol	Railcar	Fertilizer	23	10	0	25000	0.2	0.08	1.6	3.99	854268345	-654483559	>25 years	0	0.3849	126000	1509.48	0.093996	0.001144	0.025163	21495456	136.95	159072	20960977	611362	33490.4	105522	-4.67677e+06	20376.7	-7.79699e+06	871.398					FALSE	1.695e+06	1.91654e+06	-1	-1	Green	0
272	CO2 Electrolysis PV Coupled	Methanol	Railcar	FCEV filling	24	10	0	25000	0.2	0.08	1.6	3.58	858749109	-673553535	>25 years	0	0.4917	294000	1695.39	0.981781	0.011946	0.262822	39140551	136.95	25000	7500000	218750	11983.1	42406.9	-1.67338e+06	7290.94	-2.78517e+06	136.95	300	2500	7.70988e-19	25000	TRUE	605472	685754	-1	-1	Green	0.0149976
273	N2 Electrolysis PV Coupled	Ammonia	Pipeline	Fertilizer	25	10	0	25000	0.2	0.08	1.6	1.77	361684276	1041680971	9.33	0.3295	0.694	90000	14.6129	0.010846	0.009246	0.032169	28792899	124.75	164331	39098431	1.14037e+06	56904.5	1905.47	-8.91951e+06	38008.6	-1.47386e+07	820.014					FALSE	3.20405e+06	3.57492e+06	3.20405e+06	3.57492e+06	Green	0
274	N2 Electrolysis PV Coupled	Ammonia	Pipeline	FCEV filling	26	10	0	25000	0.2	0.08	1.6	6.11	1072633713	-1028967967	>25 years	0	0.1669	61000	152.631	0.113282	0.096574	0.336005	4603354	124.75	61000	1.04423e+07	304566	15197.8	5315.48	-2.38641e+06	10151.2	-3.93153e+06	304.39	300	2230.8	0.00949433	61000	TRUE	854680	954777	-1	-1	Green	0.00135018
275	N2 Electrolysis PV Coupled	Ammonia	Railcar	Fertilizer	27	10	0	25000	0.2	0.08	1.6	1.61	318339253	1246831358	7.83	0.3601	0.7132	82000	4.47106	0.02134	0.000264	0.005711	29263276	124.75	164345	40255555	1.17412e+06	58588.6	600.264	-9.1838e+06	39133.4	-1.51762e+07	820.081					FALSE	3.29917e+06	3.68072e+06	3.29917e+06	3.68072e+06	Green	0
276	N2 Electrolysis PV Coupled	Ammonia	Railcar	FCEV filling	28	10	0	25000	0.2	0.08	1.6	2.07	522235132	1162793629	17.25	0.1576	0.62	192000	46.6998	0.222889	0.002757	0.059649	114007077	124.75	25000	7500000	218750	10915.6	1168.11	-1.71462e+06	7290.94	-2.82641e+06	124.75	300	2500	7.70988e-19	25000	TRUE	614437	685754	614437	685754	Green	0.000413111
277	H2O electrolysis PV Coupled	Gas H2	Pipeline	Fertilizer	29	10	0	25000	0.2	0.08	1.6	2.22	407769863	786147474	11.58	0.2552	0.6308	99000	8787.09	7.20049	1.54726	29.1204	27786673	124.75	164308	37651933	1.09818e+06	54799.3	1.10341e+06	-8.15189e+06	36602.4	-1.30918e+07	819.895					FALSE	2.84604e+06	3.44266e+06	2.84604e+06	3.44266e+06	Green	0
278	H2O electrolysis PV Coupled	Gas H2	Pipeline	FCEV filling	30	10	0	25000	0.2	0.08	1.6	3.7	918576947	-768849647	>25 years	0	0.4932	207000	9195.97	7.50403	1.80607	30.0207	22644307	124.75	25000	7500000	218750	10915.6	230020	-1.6238e+06	7290.94	-2.59756e+06	124.75	300	2500	7.70988e-19	25000	TRUE	564687	685754	-1	-1	Green	0.0813484
279	H2O electrolysis PV Coupled	Gas H2	Railcar	Fertilizer	31	10	0	25000	0.2	0.08	1.6	2.47	371425426	815093307	10.92	0.2401	0.5939	97000	9207.77	6.83529	5.82842	20.2739	26380465	124.75	164319	38250118	1.11563e+06	55669.9	1.17461e+06	-8.2814e+06	37183.9	-1.32461e+07	819.95					FALSE	2.87959e+06	3.49736e+06	2.87959e+06	3.49736e+06	Green	0
280	H2O electrolysis PV Coupled	Gas H2	Railcar	FCEV filling	32	10	0	25000	0.2	0.08	1.6	6.53	407331525	-414970174	>25 years	0	0.0009	93000	9208.7	6.83982	5.82849	20.275	3238596	124.75	93000	1.25312e+07	365494	18238.2	384856	-2.71309e+06	12181.9	-4.33955e+06	464.07	300	2175.27	0.0115949	93000	TRUE	943381	1.14578e+06	-1	-1	Green	0.0814611
281	H2O electrolysis PV Coupled	Formic Acid	Pipeline	Fertilizer	33	10	0	25000	0.2	0.08	1.6	3.79	572931605	-123588815	23.33	0.0116	0.4117	117000	73105.6	7.22971	3.32727	46.269	21290936	124.75	163732	29317914	855106	42669.8	7.14809e+06	458370	28500.7	-3.90508e+06	817.021					FALSE	848931	2.68065e+06	-1	-1	Grey	0
282	H2O electrolysis PV Coupled	Formic Acid	Pipeline	FCEV filling	34	10	0	25000	0.2	0.08	1.6	11.75	1196169714	-1303143951	>25 years	0	0	N/A	73364.9	7.42219	3.49135	46.8398	-820821	124.75	25000	7500000	218750	10915.6	1.83508e+06	117259	7290.94	-992498	124.75	300	2500	7.70988e-19	25000	TRUE	215760	685754	-1	-1	Grey	0.648992
283	H2O electrolysis PV Coupled	Formic Acid	Railcar	Fertilizer	35	10	0	25000	0.2	0.08	1.6	3.71	528965742	2050857	21.08	0.0393	0.4254	116000	73097.8	7.30321	3.31105	46.2336	21648788	124.75	163972	31114424	907504	45284.5	7.58529e+06	486459	30247.1	-4.14518e+06	818.218					FALSE	901126	2.84491e+06	901126	2.84491e+06	Grey	0
284	H2O electrolysis PV Coupled	Formic Acid	Railcar	FCEV filling	36	10	0	25000	0.2	0.08	1.6	3.48	530271452	204184771	22.83	0	0.4427	242000	73283.4	8.18994	3.32185	46.471	74305047	124.75	25000	7500000	218750	10915.6	1.83304e+06	117259	7290.94	-994535	124.75	300	2500	7.70988e-19	25000	TRUE	216203	685754	216203	685754	Grey	0.648272
285	H2O electrolysis PV Coupled	Liquid H2	Truck	Fertilizer	37	10	0	25000	0.2	0.08	1.6	3.77	604131328	-181247542	24.5	0	0.496	119000	41014.4	30.5824	25.8414	90.1419	21485902	124.75	163560	28400897	828359	41335.1	3.88485e+06	-6.14898e+06	27609.2	-6.82259e+06	816.164					FALSE	1.48317e+06	2.5968e+06	-1	-1	Grey	0
286	H2O electrolysis PV Coupled	Liquid H2	Truck	FCEV filling	38	10	0	25000	0.2	0.08	1.6	3.32	608204899	-5764260	24.83	0	0.4709	258000	43197.8	33.7086	25.9302	92.959	70864606	124.75	25000	7500000	218750	10915.6	1.08051e+06	-1.6238e+06	7290.94	-1.74707e+06	124.75	300	2500	7.70988e-19	25000	TRUE	379797	685754	-1	-1	Grey	0.382132
287	H2O electrolysis PV Coupled	Liquid H2	Railcar	Fertilizer	39	10	0	25000	0.2	0.08	1.6	3.75	604116599	-175390064	24.33	0.0014	0.4191	118000	40785.2	30.2609	25.8321	89.8462	21585505	124.75	163577	28483917	830781	41456	3.87443e+06	-6.16695e+06	27689.9	-6.86431e+06	816.249					FALSE	1.49224e+06	2.6044e+06	-1	-1	Grey	0
288	H2O electrolysis PV Coupled	Liquid H2	Railcar	FCEV filling	40	10	0	25000	0.2	0.08	1.6	3.27	606891218	18811562	24.58	0	0.4782	252000	40803.9	30.3507	25.8331	89.8702	72012574	124.75	25000	7500000	218750	10915.6	1.02063e+06	-1.6238e+06	7290.94	-1.80695e+06	124.75	300	2500	7.70988e-19	25000	TRUE	392815	685754	392815	685754	Grey	0.360955
289	SMR	Gas H2	Pipeline	Fertilizer	41	10	6.5	25000	0.2	0.08	1.6	1.84	116630225	1528578116	3.92	0.4427	0.696	57000	73705.1	34.2938	1.54726	88.6187	25721933	0	164361	42368943	1.23576e+06	0	1.04148e+07		41187.9	-5.55874e+06	0					FALSE	1.20842e+06	3.87396e+06	1.20842e+06	3.87396e+06	Grey	0
290	SMR	Gas H2	Pipeline	FCEV filling	42	10	6.5	25000	0.2	0.08	1.6	3.29	627428209	-287927674	>25 years	0.0532	0.509	264000	74113.9	34.5973	1.80607	89.5191	43220096	0	25000	7500000	218750	0	1.85382e+06		7290.94	-973762	0	300	2500	7.70988e-19	25000	TRUE	211687	685754	-1	-1	Grey	0.655619
291	SMR	Gas H2	Railcar	Fertilizer	43	10	6.5	25000	0.2	0.08	1.6	2.09	80285787	1574190192	2.75	0.4277	0.65	43000	74125.7	33.9286	5.82842	79.7722	24313155	0	164364	43035589	1.2552e+06	0	1.0639e+07		41836	-5.58583e+06	0					FALSE	1.21431e+06	3.93491e+06	1.21431e+06	3.93491e+06	Grey	0
292	SMR	Gas H2	Railcar	FCEV filling	44	10	6.5	25000	0.2	0.08	1.6	5.81	116182788	255051144	17.33	0.0141	0.146	181000	74126.7	33.9331	5.82849	79.7733	26926052	0	25000	7500000	218750	0	1.85414e+06		7290.94	-973443	0	300	2500	7.70988e-19	25000	TRUE	211618	685754	211618	685754	Grey	0.655731
293	SMR	Formic Acid	Pipeline	Fertilizer	45	10	6.5	25000	0.2	0.08	1.6	2.62	281070626	747402636	10.75	0.2995	0.591	97000	68417.7	34.323	0.017372	105.767	24067607	0	164303	37463740	1.09269e+06	0	8.54842e+06	-660624	36419.4	-5.57581e+06	0					FALSE	1.21213e+06	3.42546e+06	1.21213e+06	3.42546e+06	Grey	0
294	SMR	Formic Acid	Pipeline	FCEV filling	46	10	6.5	25000	0.2	0.08	1.6	6.89	904308735	-868319000	>25 years	0	0.045	45000	68677	34.5155	0.181452	106.338	2208747	0	45000	9.264e+06	270200	0	2.12186e+06	-167982	9005.77	-1.37077e+06	0	300	2281.29	0.00762925	45000	TRUE	297994	847044	-1	-1	Grey	0.607523
295	SMR	Formic Acid	Railcar	Fertilizer	47	10	6.5	25000	0.2	0.08	1.6	2.51	237104763	925846006	8.92	0.3273	0.604	92000	68409.9	34.3965	0.001144	105.732	24383771	0	164328	38877437	1.13393e+06	0	8.86998e+06	-741105	37793.7	-5.78723e+06	0					FALSE	1.25809e+06	3.55471e+06	1.25809e+06	3.55471e+06	Grey	0
296	SMR	Formic Acid	Railcar	FCEV filling	48	10	6.5	25000	0.2	0.08	1.6	2.6	238410473	1955071612	10.67	0.2826	0.566	132000	68595.5	35.2832	0.011946	105.969	104084386	0	25000	7500000	218750	0	1.71579e+06	-138351	7290.94	-1.11179e+06	0	300	2500	7.70988e-19	25000	TRUE	241694	685754	241694	685754	Grey	0.606802
297	SMR	Liquid H2	Truck	Fertilizer	49	10	6.5	25000	0.2	0.08	1.6	3.56	312991690	346329858	14.58	0.1867	0.46	106000	105932	57.6757	25.8414	149.64	19541247	0	164204	34378579	1.00271e+06	0	1.21457e+07	3.69502e+06	33420.3	-815395	0					FALSE	177260	3.14337e+06	177260	3.14337e+06	Grey	0
298	SMR	Liquid H2	Truck	FCEV filling	50	10	6.5	25000	0.2	0.08	1.6	3.4	317065261	864499417	16.92	0.1599	0.461	185000	108116	60.8019	25.9302	152.457	80359587	0	25000	7500000	218750	0	2.70431e+06	850491	7290.94	-123270	0	300	2500	7.70988e-19	25000	TRUE	26797.8	685754	26797.8	685754	Grey	0.956403
299	SMR	Liquid H2	Railcar	Fertilizer	51	10	6.5	25000	0.2	0.08	1.6	3.53	312976961	353336566	14.5	0.19	0.462	107000	105703	57.3542	25.8321	149.345	19638420	0	164207	34435694	1.00437e+06	0	1.21396e+07	3.62653e+06	33475.8	-843072	0					FALSE	183277	3.14859e+06	183277	3.14859e+06	Grey	0
300	SMR	Liquid H2	Railcar	FCEV filling	52	10	6.5	25000	0.2	0.08	1.6	3.35	315751579	899025879	16.58	0.1688	0.472	190000	105722	57.444	25.8331	149.369	81243682	0	25000	7500000	218750	0	2.64443e+06	790295	7290.94	-183149	0	300	2500	7.70988e-19	25000	TRUE	39814.9	685754	39814.9	685754	Grey	0.935226
301	CO Purchase	Methyl Formate	Pipeline	Fertilizer	53	10	0.3	25000	0.2	0.08	1.6	7.75	219813200	-232538768	>25 years	0	0	N/A	243069	10.5127	6.55128	48.8859	-91408	0	25000	7387500	215469	0	5.9887e+06	4.30304e+06	7181.57	3.20354e+06	0					FALSE	0	0	-1	-1	Grey	0
302	CO Purchase	Methyl Formate	Pipeline	FCEV filling	54	10	0.3	25000	0.2	0.08	1.6	11.63	732252023	-998987562	>25 years	0	0	N/A	243277	10.6673	6.6831	49.3445	-2220308	0		#DIV/0!	#DIV/0!	#DIV/0!	#DIV/0!	#DIV/0!	#DIV/0!	#DIV/0!	0	#DIV/0!	#NUM!	#NUM!	0	TRUE	#DIV/0!	#DIV/0!	-1	-1	Grey	#DIV/0!
303	CO Purchase	Methyl Formate	Railcar	Fertilizer	55	10	0.3	25000	0.2	0.08	1.6	6.35	175716425	-161661219	>25 years	0	0.091	112000	243066	10.5904	6.53847	48.8625	3126763	0	130487	12955746	377876	0	1.05025e+07	7.54664e+06	12594.6	5.61807e+06	0					FALSE	0	0	-1	-1	Grey	0
304	CO Purchase	Methyl Formate	Railcar	FCEV filling	56	10	0.3	25000	0.2	0.08	1.6	7.78	180088969	-202796786	>25 years	0	0	N/A	243252	11.4781	6.54935	49.1001	-151783	0	25000	7500000	218750	0	6.08449e+06	4.36871e+06	7290.94	3.25691e+06	0	300	2500	7.70988e-19	25000	TRUE	0	0	-1	-1	Grey	0
305	CO Purchase	Formic Acid	Pipeline	Fertilizer	57	10	0.3	25000	0.2	0.08	1.6	5.19	218593455	54134520	18.5	0.0568	0.23	113000	195415	10.5167	6.55469	48.8978	10550974	0	163971	31091634	906839	0	2.02632e+07	1.31687e+07	30225	8.54129e+06	0					FALSE	0	0	0	0	Grey	0
306	CO Purchase	Formic Acid	Pipeline	FCEV filling	58	10	0.3	25000	0.2	0.08	1.6	11.28	841827287	-1040926879	>25 years	0	0	N/A	195674	10.7092	6.71877	49.4687	-1680675	0		#DIV/0!	#DIV/0!	#DIV/0!	#DIV/0!	#DIV/0!	#DIV/0!	#DIV/0!	0	#DIV/0!	#NUM!	#NUM!	0	TRUE	#DIV/0!	#DIV/0!	-1	-1	Grey	#DIV/0!
307	CO Purchase	Formic Acid	Railcar	Fertilizer	59	10	0.3	25000	0.2	0.08	1.6	5.1	174627592	197438049	14.3	0.0846	0.25	106000	195407	10.5902	6.53847	48.8625	10886083	0	164221	34705405	1.01224e+06	0	2.26174e+07	1.46993e+07	33738	9.53314e+06	0					FALSE	0	0	0	0	Grey	0
308	CO Purchase	Formic Acid	Railcar	FCEV filling	60	10	0.3	25000	0.2	0.08	1.6	5.29	175929025	288840732	18.75	0.04	0.23	195000	195593	11.477	6.54927	49.0999	36821000	0	25000	7500000	218750	0	4.89238e+06	3.17659e+06	7290.94	2.0648e+06	0	300	2500	7.70988e-19	25000	TRUE	0	0	0	0	Grey	0
309	CO Purchase	Methanol	Pipeline	Fertilizer	61	10	0.3	25000	0.2	0.08	1.6	7.52	415807952	-417995927	>25 years	0	0	N/A	193425	1.44067	1.90878	0.025163	660407	0	37743.6	8189179	238851	0	5.28273e+06	3.41413e+06	7960.91	2.19532e+06	0					FALSE	0	0	-1	-1	Grey	0
310	CO Purchase	Methanol	Pipeline	FCEV filling	62	10	0.3	25000	0.2	0.08	1.6	12.54	972688385	-1246839618	>25 years	0	0	N/A	193591	1.48485	2.02551	0.409855	-2247026	0		#DIV/0!	#DIV/0!	#DIV/0!	#DIV/0!	#DIV/0!	#DIV/0!	#DIV/0!	0	#DIV/0!	#NUM!	#NUM!	0	TRUE	#DIV/0!	#DIV/0!	-1	-1	Grey	#DIV/0!
311	CO Purchase	Methanol	Railcar	Fertilizer	63	10	0.3	25000	0.2	0.08	1.6	7.52	415807952	-417995927	>25 years	0	0	N/A	193425	1.44067	1.90878	0.025163	660407	0	37743.6	8189179	238851	0	5.28273e+06	3.41435e+06	7960.91	2.19532e+06	0					FALSE	0	0	-1	-1	Grey	0
312	CO Purchase	Methanol	Railcar	FCEV filling	64	10	0.3	25000	0.2	0.08	1.6	8.53	420269488	-436785709	>25 years	0	0	N/A	193610	2.32845	1.91958	0.262822	-73839	0	25000	7500000	218750	0	4.8428e+06	3.12701e+06	7290.94	2.01522e+06	0	300	2500	7.70988e-19	25000	TRUE	0	0	-1	-1	Grey	0
313	Biomass Gasification	Gas H2	Pipeline	Fertilizer	1	10	100	100000	0.2	0.08	1.6	3.45	504905904	1054121828	5	0.327	0.48	131000	1245410	41.9501	19.0987	126.997	18625964	0	164384	47593354	1.38814e+06	0	4.94202e+07	3.77212e+07	46266.7	3.1477e+07	0					FALSE	0	0	0	0	Grey	0
314	Biomass Gasification	Gas H2	Pipeline	FCEV filling	2	10	100	100000	0.2	0.08	1.6	3.53	1224784747	1688047370	16	0.1861	0.42	341000	1247045	43.1642	20.134	130.598	158329817	0	100000	30000000	875000	0	3.11924e+07	2.37772e+07	29163.8	1.98821e+07	0	300	10000	7.70988e-19	100000	TRUE	0	0	0	0	Grey	0
315	Biomass Gasification	Gas H2	Railcar	Fertilizer	3	10	100	100000	0.2	0.08	1.6	3.82	476729299	935184889	6	0.2903	0.43	130000	1247092	40.4893	36.2234	91.6109	16914161	0	164384	47583069	1.38784e+06	0	4.94763e+07	3.7713e+07	46256.7	3.1537e+07	0					FALSE	0	0	0	0	Grey	0
316	Biomass Gasification	Gas H2	Railcar	FCEV filling	4	10	100	100000	0.2	0.08	1.6	8.22	617034786	-877429704	>25 years	0	0	N/A	1247096	40.5074	36.2236	91.6154	-1859268	0	100000	30000000	875000	0	3.11937e+07	2.37772e+07	29163.8	1.98834e+07	0	300	10000	7.70988e-19	100000	TRUE	0	0	-1	-1	Grey	0
317	Biomass Gasification	Formic Acid	Pipeline	Fertilizer	5	10	100	100000	0.2	0.08	1.6	3.82	740796330	682968713	8.58	0.2809	0.44	142000	1224260	42.067	26.2188	195.591	17818938	0	164384	47314836	1.38002e+06	0	4.82967e+07	3.75004e+07	45995.9	3.04585e+07	0					FALSE	0	0	0	0	Grey	0
318	Biomass Gasification	Formic Acid	Pipeline	FCEV filling	6	10	100	100000	0.2	0.08	1.6	3.77	1581972626	542060083	21.16	0.1159	0.41	546000	1225297	42.8369	26.8751	197.875	152758204	0	100000	30000000	875000	0	3.06485e+07	2.37772e+07	29163.8	1.93381e+07	0	300	10000	7.70988e-19	100000	TRUE	0	0	0	0	Grey	0
319	Biomass Gasification	Formic Acid	Railcar	Fertilizer	7	10	100	100000	0.2	0.08	1.6	3.78	684853469	757667732	7.88	0.2865	0.44	140000	1224229	42.361	26.1539	195.45	17872945	0	164384	47382002	1.38198e+06	0	4.8364e+07	3.75537e+07	46061.2	3.05005e+07	0					FALSE	0	0	0	0	Grey	0
320	Biomass Gasification	Formic Acid	Railcar	FCEV filling	8	10	100	100000	0.2	0.08	1.6	4.23	690344115	2913099010	9.3	0.2417	0.38	196000	1224972	45.9079	26.1971	196.399	15788748	0	100000	30000000	875000	0	3.06403e+07	2.37772e+07	29163.8	1.933e+07	0	300	10000	7.70988e-19	100000	TRUE	0	0	0	0	Grey	0
321	Biomass Gasification	Liquid H2	Truck	Fertilizer	9	10	100	100000	0.2	0.08	1.6	5.31	1162387415	-352357396	>25 years	0.1123	0.22	158000	1374319	135.478	116.275	371.083	12095594	0	164384	46132456	1.34553e+06	0	5.28616e+07	3.65633e+07	44846.5	3.54692e+07	0					FALSE	0	0	-1	-1	Grey	0
322	Biomass Gasification	Liquid H2	Truck	FCEV filling	10	10	100	100000	0.2	0.08	1.6	4.43	1174310057	714433946	19.9	0.0876	0.3	549000	1383053	147.982	116.63	382.351	125238360	0	100000	30000000	875000	0	3.45944e+07	2.37772e+07	29163.8	2.32841e+07	0	300	10000	7.70988e-19	100000	TRUE	0	0	0	0	Grey	0
323	Biomass Gasification	Liquid H2	Railcar	Fertilizer	11	10	100	100000	0.2	0.08	1.6	5.27	1159724209	-338217849	24.3	0.1164	0.23	156000	1373402	134.192	134.192	369.9	12205509	0	164384	46156799	1.34624e+06	0	5.28542e+07	3.65826e+07	44870.2	3.54526e+07	0					FALSE	0	0	-1	-1	Grey	0
324	Biomass Gasification	Liquid H2	Railcar	FCEV filling	12	10	100	100000	0.2	0.08	1.6	4.38	1171731303	770301483	19.58	0.0948	0.31	480000	1373477	134.551	116.242	369.996	126424436	0	100000	30000000	875000	0	3.43549e+07	2.37772e+07	29163.8	2.30446e+07	0	300	10000	7.70988e-19	100000	TRUE	0	0	0	0	Grey	0
325	CO2 Electrolysis PV Coupled	Methyl Formate	Pipeline	Fertilizer	13	10	0	100000	0.2	0.08	1.6	2.87	733135568	1144130402	6.58	0.3735	0.56	133000	204615	28.9028	13.2954	185.028	22721151	137	164384	47522331	1.38607e+06	18989.1	8.10739e+06	-2.73618e+06	46197.6	-9.80904e+06	225.205					FALSE	2.1324e+06	4.34515e+06	2.1324e+06	4.34515e+06	Grey	0
326	CO2 Electrolysis PV Coupled	Methyl Formate	Pipeline	FCEV filling	14	10	0	100000	0.2	0.08	1.6	2.74	1457947790	2347626404	15.08	0.2292	0.48	376000	205448	29.521	13.8227	186.863	197742840	137	100000	30000000	875000	11987.5	5.13889e+06	-1.7324e+06	29163.8	-6.17143e+06	137	300	10000	7.70988e-19	100000	TRUE	1.34162e+06	2.74302e+06	1.34162e+06	2.74302e+06	Grey	0.454353
327	CO2 Electrolysis PV Coupled	Methyl Formate	Railcar	Fertilizer	15	10	0	100000	0.2	0.08	1.6	2.83	677060166	1225183908	6	0.3808	0.57	133000	204605	29.2133	13.2442	184.935	22856293	137	164384	47567492	1.38739e+06	19007.2	8.11471e+06	-2.73792e+06	46241.5	-9.81874e+06	225.205					FALSE	2.13451e+06	4.34928e+06	2.13451e+06	4.34928e+06	Grey	0
328	CO2 Electrolysis PV Coupled	Methyl Formate	Railcar	FCEV filling	16	10	0	100000	0.2	0.08	1.6	2.35	691422071	4388277831	6.9	0.349	0.52	159000	205349	32.7644	13.2877	185.885	2.04953e+08	137	100000	30000000	875000	11987.5	5.1364e+06	-1.72674e+06	29163.8	-6.17392e+06	137	300	10000	7.70988e-19	100000	TRUE	1.34216e+06	2.74302e+06	1.34216e+06	2.74302e+06	Grey	0.454133
329	CO2 Electrolysis PV Coupled	Formic Acid	Pipeline	Fertilizer	17	10	0	100000	0.2	0.08	1.6	3.45	1699610742	140451038	16.41	0.2653	0.47	150000	13999	28.9188	13.3091	185.076	24121338	548	164384	46991745	1.37059e+06	75108.5	548485	-1.0174e+07	45681.9	-1.71679e+07	900.822					FALSE	3.73215e+06	4.29664e+06	3.73215e+06	4.29664e+06	Green	0
330	CO2 Electrolysis PV Coupled	Formic Acid	Pipeline	FCEV filling	18	10	0	100000	0.2	0.08	1.6	2.42	2540796927	709861470	21.33	0.0996	0.53	525000	15036.1	29.6888	13.9654	187.359	226750062	548	100000	30000000	875000	47950	376098	-6.49519e+06	29163.8	-1.09342e+07	548	300	10000	7.70988e-19	100000	TRUE	2.377e+06	2.74302e+06	2.377e+06	2.74302e+06	Green	0.0332526
331	CO2 Electrolysis PV Coupled	Formic Acid	Railcar	Fertilizer	19	10	0	100000	0.2	0.08	1.6	3.4	1643667881	215002615	15.75	0.2709	0.48	150000	13967.8	29.2128	13.2442	184.935	24175345	548	164384	47046871	1.3722e+06	75196.6	547905	-1.0186e+07	45735.4	-1.71893e+07	900.822					FALSE	3.7368e+06	4.30168e+06	3.7368e+06	4.30168e+06	Green	0
332	CO2 Electrolysis PV Coupled	Formic Acid	Railcar	FCEV filling	20	10	0	100000	0.2	0.08	1.6	2.13	1649168416	3215032928	13.58	0.2261	0.51	296000	14710.2	32.7598	13.2874	185.884	230018667	548	100000	30000000	875000	47950	367949	-6.49519e+06	29163.8	-1.09424e+07	548	300	10000	7.70988e-19	100000	TRUE	2.37878e+06	2.74302e+06	2.37878e+06	2.74302e+06	Green	0.0325321
333	CO2 Electrolysis PV Coupled	Methanol	Pipeline	Fertilizer	21	10	0	100000	0.2	0.08	1.6	4.73	2378071376	-1022848760	>25 years	0.1069	0.3	158000	6030.46	0.052917	0.045143	0.156959	20727074	548	164384	46059427	1.3434e+06	73618.3	231587	-1.02782e+07	44775.5	-1.71333e+07	900.822					FALSE	3.72463e+06	4.21139e+06	-1	-1	Green	0
334	CO2 Electrolysis PV Coupled	Methanol	Pipeline	FCEV filling	22	10	0	100000	0.2	0.08	1.6	2.98	3104475192	-1375595408	>25 years	0	0.51	754000	6703.72	0.552712	0.471509	1.63942	193164729	548	100000	30000000	875000	47950	167681	-6.70361e+06	29163.8	-1.11426e+07	548	300	10000	7.70988e-19	100000	TRUE	2.42231e+06	2.74302e+06	-1	-1	Green	0.0148254
335	CO2 Electrolysis PV Coupled	Methanol	Railcar	Fertilizer	23	10	0	100000	0.2	0.08	1.6	4.66	2321951932	-935536886	>25 years	0.1156	0.3	157000	6037.91	0.375985	0.004575	0.100651	20931040	548	164384	46143723	1.34586e+06	73753.1	232298	-1.02955e+07	44857.5	-1.71644e+07	900.822					FALSE	3.73139e+06	4.2191e+06	-1	-1	Green	0
336	CO2 Electrolysis PV Coupled	Methanol	Railcar	FCEV filling	24	10	0	100000	0.2	0.08	1.6	2.53	2336326786	1171422966	20.25	0.0967	0.52	493000	6781.56	3.92713	0.047786	1.05129	226330895	548	100000	30000000	875000	47950	169628	-6.69351e+06	29163.8	-1.11407e+07	548	300	10000	7.70988e-19	100000	TRUE	2.42189e+06	2.74302e+06	2.42189e+06	2.74302e+06	Green	0.0149976
337	N2 Electrolysis PV Coupled	Ammonia	Pipeline	Fertilizer	25	10	0	100000	0.2	0.08	1.6	2.54	1267404661	878969471	9.75	0.3775	0.59	142000	58.4517	0.043383	0.036984	0.128677	26350213	499	164384	47393399	1.38231e+06	68977.1	2309.73	-1.08118e+07	46072.3	-1.78655e+07	820.274					FALSE	3.88381e+06	4.33336e+06	3.88381e+06	4.33336e+06	Green	0
338	N2 Electrolysis PV Coupled	Ammonia	Pipeline	FCEV filling	26	10	0	100000	0.2	0.08	1.6	2.34	2441395548	983596555	20.5	0.1279	0.55	533000	610.522	0.45313	0.386297	1.34402	2.27586e+08	499	100000	30000000	875000	43662.5	15271.1	-6.85602e+06	29163.8	-1.1295e+07	499	300	10000	7.70988e-19	100000	TRUE	2.45545e+06	2.74302e+06	2.45545e+06	2.74302e+06	Green	0.00135018
339	N2 Electrolysis PV Coupled	Ammonia	Railcar	Fertilizer	27	10	0	100000	0.2	0.08	1.6	2.49	1.21278e+09	3.28622e+08	9.17	0.3847	0.61	138000	17.8842	0.0853581	0.00105578	0.0228432	2.64918e+07	499	164384	47435099	1.38352e+06	69037.8	707.321	-1.08217e+07	46112.8	-1.78828e+07	820.274					FALSE	3.88757e+06	4.33718e+06	3.88757e+06	4.33718e+06	Green	0
340	N2 Electrolysis PV Coupled	Ammonia	Railcar	FCEV filling	28	10	0	100000	0.2	0.08	1.6	1.8	1679256353	3509709556	13.16	0.264	0.56	328000	186.799	0.891556	0.011027	0.238595	243597463	499	100000	30000000	875000	43662.5	4672.42	-6.85847e+06	29163.8	-1.13056e+07	499	300	10000	7.70988e-19	100000	TRUE	2.45775e+06	2.74302e+06	2.45775e+06	2.74302e+06	Green	0.000413111
341	H2O electrolysis PV Coupled	Gas H2	Pipeline	Fertilizer	29	10	0	100000	0.2	0.08	1.6	2.88	1354332876	688210256	11.33	0.3379	0.55	149000	35148.4	28.802	6.18905	116.482	25478846	499	164384	47302916	1.37967e+06	68845.5	1.38624e+06	-1.02414e+07	45984.3	-1.64475e+07	820.274					FALSE	3.57553e+06	4.32509e+06	3.57553e+06	4.32509e+06	Green	0
342	H2O electrolysis PV Coupled	Gas H2	Pipeline	FCEV filling	30	10	0	100000	0.2	0.08	1.6	2.1	2074240639	2213034674	16.9	0.1962	0.57	363000	36783.9	30.0161	7.2243	120.083	234558155	499	100000	30000000	875000	43662.5	920079	-6.4952e+06	29163.8	-1.03902e+07	499	300	10000	7.70988e-19	100000	TRUE	2.25875e+06	2.74302e+06	2.25875e+06	2.74302e+06	Green	0.0813484
343	H2O electrolysis PV Coupled	Gas H2	Railcar	Fertilizer	31	10	0	100000	0.2	0.08	1.6	3.25	1326156271	569109300	12.08	0.3012	0.51	146000	36831.1	27.3412	23.3137	81.0955	23767043	499	164384	47275920	1378881	68806.2	1.45178e+06	-1.02355e+07	45958.1	-1.63717e+07	820.274					FALSE	3.55908e+06	4.32262e+06	3.55908e+06	4.32262e+06	Green	0
344	H2O electrolysis PV Coupled	Gas H2	Railcar	FCEV filling	32	10	0	100000	0.2	0.08	1.6	5.61	1466490678	-1107590957	>25 years	0	0.17	114000	36834.8	27.3593	23.314	81.1	64725024	499	100000	30000000	875000	43662.5	921353	-6.49519e+06	29163.8	-1.0389e+07	499	300	10000	7.70988e-19	100000	TRUE	2.25847e+06	2.74302e+06	-1	-1	Green	0.0814611
345	H2O electrolysis PV Coupled	Formic Acid	Pipeline	Fertilizer	33	10	0	100000	0.2	0.08	1.6	4.18	1565607594	-65382727	19	0.198	0.37	152000	292422	28.9188	13.3091	185.076	20064852	499	164384	46869428	1.36702e+06	68214.5	1.14274e+07	732781	45562.9	-6.2429e+06	820.274					FALSE	1.35715e+06	4.28545e+06	-1	-1	Grey	0
346	H2O electrolysis PV Coupled	Formic Acid	Pipeline	FCEV filling	34	10	0	100000	0.2	0.08	1.6	3.26	2406744761	-185889413	23.9	0.0324	0.45	650000	293459	29.6888	13.9654	187.359	185803530	499	100000	30000000	875000	43662.5	7.34033e+06	469035	29163.8	-3.96999e+06	499	300	10000	7.70988e-19	100000	TRUE	863042	2.74302e+06	-1	-1	Grey	0.648992
347	H2O electrolysis PV Coupled	Formic Acid	Railcar	Fertilizer	35	10	0	100000	0.2	0.08	1.6	4.14	1509664733	9339656	18.08	0.2035	0.39	151000	292391	29.2128	13.2442	184.935	20118860	499	164384	46934190	1.36891e+06	68308.8	1.14419e+07	733793	45625.9	-6.25275e+06	820.274					FALSE	1.35929e+06	4.29138e+06	1.35929e+06	4.29138e+06	Grey	0
348	H2O electrolysis PV Coupled	Formic Acid	Railcar	FCEV filling	36	10	0	100000	0.2	0.08	1.6	2.99	1515116250	2373906405	14.83	0.1588	0.41	297000	293134	32.7598	13.2874	185.884	192259197	499	100000	30000000	875000	43662.5	7.33218e+06	469035	29163.8	-3.97814e+06	499	300	10000	7.70988e-19	100000	TRUE	864814	2.74302e+06	864814	2.74302e+06	Grey	0.648272
349	H2O electrolysis PV Coupled	Liquid H2	Truck	Fertilizer	37	10	0	100000	0.2	0.08	1.6	4.74	2011814387	-725183456	>25 years	0.1227	0.29	157000	164058	122.33	103.365	360.567	18948476	499	164384	46262132	1.34931e+06	67330.7	6.32802e+06	-1.00161e+07	44972.6	-1.11133e+07	820.274					FALSE	2.41593e+06	4.22993e+06	-1	-1	Grey	0
350	H2O electrolysis PV Coupled	Liquid H2	Truck	FCEV filling	38	10	0	100000	0.2	0.08	1.6	3.01	2.02387e+09	1.18693e+09	19.67	0.0936	0.457	444000	172791	134.834	103.721	371.836	1.99862e+08	499	100000	30000000	875000	43662.5	4.32205e+06	-6.49519e+06	29163.8	-6.98827e+06	499	300	10000	7.70988e-19	100000	TRUE	1.51919e+06	2.74302e+06	1.51919e+06	2.74302e+06	Grey	0.382132
351	H2O electrolysis PV Coupled	Liquid H2	Railcar	Fertilizer	39	10	0	100000	0.2	0.08	1.6	4.7	2009151181	-710958192	>25 years	0.1267	0.3	156000	163141	121.044	103.328	359.385	19058390	499	164384	46276559	1.34973e+06	67351.7	6.29462e+06	-1.00192e+07	44986.6	-1.11521e+07	820.274					FALSE	2.42438e+06	4.23125e+06	-1	-1	Grey	0
352	H2O electrolysis PV Coupled	Liquid H2	Railcar	FCEV filling	40	10	0	100000	0.2	0.08	1.6	2.93	2.0212e+09	1.28236e+09	19.33	0.1038	0.47	438000	163216	121.403	103.332	359.481	2.02306e+08	499	100000	30000000	875000	43662.5	4.08253e+06	-6.49519e+06	29163.8	-7.22779e+06	499	300	10000	7.70988e-19	100000	TRUE	1.57126e+06	2.74302e+06	1.57126e+06	2.74302e+06	Grey	0.360955
353	SMR	Gas H2	Pipeline	Fertilizer	41	10	6.5	100000	0.2	0.08	1.6	1.88	281803195	1912884106	2.33	0.4941	0.635	108000	294820	137.175	6.18905	354.475	25218437	0	164384	47756436	1.3929e+06	0	1.17391e+07		46425.2	-6.26557e+06	0					FALSE	1.36208e+06	4.36656e+06	1.36208e+06	4.36656e+06	Grey	0
354	SMR	Gas H2	Pipeline	FCEV filling	42	10	6.5	100000	0.2	0.08	1.6	2.16	1001682038	3825648758	9.67	0.3533	0.59	214000	296456	138.389	7.2243	358.076	211025581	0	100000	30000000	875000	0	7.41527e+06		29163.8	-3.89505e+06	0	300	10000	7.70988e-19	100000	TRUE	846749	2.74302e+06	846749	2.74302e+06	Grey	0.655619
355	SMR	Gas H2	Railcar	Fertilizer	43	10	6.5	100000	0.2	0.08	1.6	2.25	253626590	1793624532	2.25	0.4574	0.578	108000	296503	135.714	23.3137	319.089	23506634	0	164384	47756436	1.3929e+06	0	1.18061e+07		46425.2	-6.19857e+06	0					FALSE	1.34752e+06	4.36656e+06	1.34752e+06	4.36656e+06	Grey	0
356	SMR	Gas H2	Railcar	FCEV filling	44	10	6.5	100000	0.2	0.08	1.6	5.78	393932077	754263873	14	0.0442	0.131	282000	296507	135.732	23.314	319.093	57870849	0	100000	30000000	875000	0	7.41655e+06		29163.8	-3.89377e+06	0	300	10000	7.70988e-19	100000	TRUE	846472	2.74302e+06	846472	2.74302e+06	Grey	0.655732
357	SMR	Formic Acid	Pipeline	Fertilizer	45	10	6.5	100000	0.2	0.08	1.6	2.2	490192550	1599458659	4	0.4544	0.659	120000	273671	137.292	0.069489	423.069	24547506	0	164384	47688349	1.39091e+06	0	1.08815e+07	-840923	46359	-7.09756e+06	0					FALSE	1.54295e+06	4.36033e+06	1.54295e+06	4.36033e+06	Grey	0
358	SMR	Formic Acid	Pipeline	FCEV filling	46	10	6.5	100000	0.2	0.08	1.6	2.39	1331329717	2915205319	13.25	0.2893	0.559	283000	274708	138.062	0.72581	425.353	208072023	0	100000	30000000	875000	0	6.87129e+06	-543982	29163.8	-4.43903e+06	0	300	10000	7.70988e-19	100000	TRUE	965006	2.74302e+06	965006	2.74302e+06	Grey	0.607523
359	SMR	Formic Acid	Railcar	Fertilizer	47	10	6.5	100000	0.2	0.08	1.6	2.16	434249689	1673300389	3.5	0.4599	0.659	117000	273640	137.586	0.004575	422.928	24601513	0	164384	47712296	1.39161e+06	0	1.08857e+07	-909522	46382.3	-7.10237e+06	0					FALSE	1.54399e+06	4.36252e+06	1.54399e+06	4.36252e+06	Grey	0
360	SMR	Formic Acid	Railcar	FCEV filling	48	10	6.5	100000	0.2	0.08	1.6	2.09	439701206	4995069870	4.42	0.4152	0.572	100000	274382	141.133	0.047786	423.877	209595248	0	100000	30000000	875000	0	6.86314e+06	-553402	29163.8	-4.44718e+06	0	300	10000	7.70988e-19	100000	TRUE	966777	2.74302e+06	966777	2.74302e+06	Grey	0.606803
361	SMR	Liquid H2	Truck	Fertilizer	49	10	6.5	100000	0.2	0.08	1.6	3.76	939284706	515255810	10.58	0.2795	0.447	144000	423729	230.703	103.365	598.561	18688067	0	164384	47123079	1.37442e+06	0	1.66482e+07	5.06481e+06	45809.5	-1.11767e+06	0					FALSE	242971	4.30865e+06	242971	4.30865e+06	Grey	0
362	SMR	Liquid H2	Truck	FCEV filling	50	10	6.5	100000	0.2	0.08	1.6	3.07	951207348	2947212765	11.33	0.2549	0.453	254000	432463	243.207	103.721	609.829	178492573	0	100000	30000000	875000	0	1.08172e+07	3.40197e+06	29163.8	-493079	0	300	10000	7.70988e-19	100000	TRUE	107191	2.74302e+06	107191	2.74302e+06	Grey	0.956403
363	SMR	Liquid H2	Railcar	Fertilizer	51	10	6.5	100000	0.2	0.08	1.6	3.72	936621500	529125482	10.5	0.2836	0.453	145000	422812	229.417	103.328	597.378	18797982	0	164384	47132065	1.37469e+06	0	1.66154e+07	4.96363e+06	45818.3	-1.15391e+06	0					FALSE	250849	4.30947e+06	250849	4.30947e+06	Grey	0
364	SMR	Liquid H2	Railcar	FCEV filling	52	10	6.5	100000	0.2	0.08	1.6	3.02	948628594	2995029417	11.17	0.262	0.469	250000	422888	229.776	103.332	597.474	179615618	0	100000	30000000	875000	0	1.05777e+07	3.16118e+06	29163.8	-732597	0	300	10000	7.70988e-19	100000	TRUE	159260	2.74302e+06	159260	2.74302e+06	Grey	0.935226
365	CO Purchase	Methyl Formate	Pipeline	Fertilizer	53	10	0.3	100000	0.2	0.08	1.6	6.16	331010027	38837753	13.75	0.0598	0.112	148000	972275	42.0509	26.2051	195.544	4854726	0	164384	46996307	1.37073e+06	0	3.80977e+07	2.73742e+07	45686.3	2.03796e+07	0					FALSE	0	0	0	0	Grey	0
366	CO Purchase	Methyl Formate	Pipeline	FCEV filling	54	10	0.3	100000	0.2	0.08	1.6	7.83	1055773229	-1132752042	>25 years	0	0	N/A	973108	42.6691	26.7324	197.378	-820605	0	100000	30000000	875000	0	2.43404e+07	1.74692e+07	29163.8	1.30301e+07	0	300	10000	7.70988e-19	100000	TRUE	0	0	-1	-1	Grey	0
367	CO Purchase	Methyl Formate	Railcar	Fertilizer	55	10	0.3	100000	0.2	0.08	1.6	6.11	274934625	121991637	10.58	0.0671	0.11	137000	972266	42.3614	26.1539	195.45	4989868	0	164384	47287407	1.37922e+06	0	3.83333e+07	2.75446e+07	45969.3	2.05055e+07	0					FALSE	0	0	0	0	Grey	0
368	CO Purchase	Methyl Formate	Railcar	FCEV filling	56	10	0.3	100000	0.2	0.08	1.6	6.04	289247511	604289102	12.58	0.0353	0.1	300000	973009	45.9126	26.1974	196.4	42996570	0	100000	30000000	875000	0	2.4338e+07	1.74748e+07	29163.8	1.30276e+07	0	300	10000	7.70988e-19	100000	TRUE	0	0	0	0	Grey	0
369	CO Purchase	Formic Acid	Pipeline	Fertilizer	57	10	0.3	100000	0.2	0.08	1.6	4.85	322834499	613771888	5.41	0.1931	0.29	132000	781660	42.067	26.2188	195.591	11144629	0	164384	47617855	1.38885e+06	0	3.10337e+07	2.01683e+07	46290.5	1.30813e+07	0					FALSE	0	0	0	0	Grey	0
370	CO Purchase	Formic Acid	Pipeline	FCEV filling	58	10	0.3	100000	0.2	0.08	1.6	5.15	1163961538	-363966670	>25 years	0.0283	0.24	685000	782697	42.8369	26.8751	197.875	80120721	0		#DIV/0!	#DIV/0!	#DIV/0!	#DIV/0!	#DIV/0!	#DIV/0!	#DIV/0!	0	#DIV/0!	#NUM!	#NUM!	0	TRUE	#DIV/0!	#DIV/0!	-1	-1	Grey	#DIV/0!
371	CO Purchase	Formic Acid	Railcar	Fertilizer	59	10	0.3	100000	0.2	0.08	1.6	4.81	266891638	688361757	4.41	0.1987	0.3	121000	781628	42.361	26.1539	195.45	11198636	0	164384	47698189	1.3912e+06	0	3.10848e+07	2.02024e+07	46368.6	1.31021e+07	0					FALSE	0	0	0	0	Grey	0
372	CO Purchase	Formic Acid	Railcar	FCEV filling	60	10	0.3	100000	0.2	0.08	1.6	4.89	272333027	1999332751	5.91	0.154	0.22	155000	782371	45.9079	26.1971	196.399	90333946	0	100000	30000000	875000	0	1.95695e+07	1.27064e+07	29163.8	8.25919e+06	0	300	10000	7.70988e-19	100000	TRUE	0	0	0	0	Grey	0
373	CO Purchase	Methanol	Pipeline	Fertilizer	61	10	0.3	100000	0.2	0.08	1.6	6.14	1.00261e+09	-5.51092e+08	>25 years	0.0337	0.115	159000	773691	5.43961	7.67567	0.156959	7.67924e+06	0	164384	45361572	1.32305e+06	0	2.92618e+07	1.89113e+07	44097.1	1.21601e+07	0					FALSE	0	0	-1	-1	Grey	0
374	CO Purchase	Methanol	Pipeline	FCEV filling	62	10	0.3	100000	0.2	0.08	1.6	7.35	1728919335	-1689754800	>25 years	0	0	N/A	774364	5.9394	8.10204	1.63942	2516141	0	3.76032e+06	#REF!	#REF!	#REF!	#REF!	#REF!	#REF!	#REF!	0	-639.591	10652.8	-0.00527016	400000	TRUE	#REF!	#REF!	-1	-1	Grey	#REF!
375	CO Purchase	Methanol	Railcar	Fertilizer	63	10	0.3	100000	0.2	0.08	1.6	6.06	946445094	-459344757	>25 years	0.0438	0.12	158000	773698	5.76267	7.6351	0.100651	7951643	0	164384	45640936	1.33119e+06	0	2.94423e+07	1.90293e+07	44368.7	1.22352e+07	0					FALSE	0	0	-1	-1	Grey	0
376	CO Purchase	Methanol	Railcar	FCEV filling	64	10	0.3	100000	0.2	0.08	1.6	5.29	9.60813e+08	4.23411e+07	23.33	0.0235	0.209	597000	774442	9.31381	7.67831	1.05129	8.4493e+07	0	100000	30000000	875000	0	1.93712e+07	1.25081e+07	29163.8	8.06087e+06	0	300	10000	7.70988e-19	100000	TRUE	0	0	0	0	Grey	0
377	Biomass Gasification	Gas H2	Pipeline	Fertilizer	1	10	100	50000	0	0.08	1.6	4.15	334129776	138237076	9.91	0.2885	0.29	50000	622705	20.975	9.54937	63.4985	4870537	0	50000	14775000	430938	0	1.53421e+07	1.17103e+07	14363.1	9.7718e+06	0					FALSE	0	0	0	0	Grey	0
378	Biomass Gasification	Gas H2	Pipeline	FCEV filling	2	10	100	50000	0	0.08	1.6	6.43	933482049	-635745930	>25 years	0.0575	0.06	50000	623523	21.5821	10.067	65.2992	2363754	0	50000	15000000	437500	0	1.55962e+07	1.18886e+07	14581.9	9.94107e+06	0	300	5000	7.70988e-19	50000	TRUE	0	0	-1	-1	Grey	0
379	Biomass Gasification	Gas H2	Railcar	Fertilizer	3	10	100	50000	0	0.08	1.6	4.44	299352225	-86382725	9.91	0.2593	0.2593	50000	623546	20.2447	18.1117	45.8055	4449032	0	50000	14775000	430938	0	1.53629e+07	1.17103e+07	14363.1	9.79253e+06	0					FALSE	0	0	-1	-1	Grey	0
380	Biomass Gasification	Gas H2	Railcar	FCEV filling	4	10	100	50000	0	0.08	1.6	8.53	370604165	-540336713	>25 years	0	0	N/A	623548	20.2537	18.1118	45.8077	-1225804	0	50000	15000000	437500	0	1.55969e+07	1.18886e+07	14581.9	9.9417e+06	0	300	5000	7.70988e-19	50000	TRUE	0	0	-1	-1	Grey	0
381	Biomass Gasification	Formic Acid	Pipeline	Fertilizer	5	10	100	50000	0	0.08	1.6	5.09	558248992	-177949458	24.33	0.1935	0.1935	50000	612130	21.0335	13.1094	97.7956	4073227	0	50000	14775000	430938	0	1.50816e+07	1.17103e+07	14363.1	9.51126e+06	0					FALSE	0	0	-1	-1	Grey	0
382	Biomass Gasification	Formic Acid	Pipeline	FCEV filling	6	10	100	50000	0	0.08	1.6	7.86	1273028826	-1107222589	>25 years	0	0	N/A	612649	21.4184	13.4375	98.9374	1150918	0	1.46745e+06	3.76213e+07	1.09729e+06	0	3.84345e+07	2.98176e+07	36572.6	2.42509e+07	0	300	4186.34	0.014801	400000	TRUE	0	0	-1	-1	Grey	0
383	Biomass Gasification	Formic Acid	Railcar	Fertilizer	7	10	100	50000	0	0.08	1.6	4.95	509071382	-83917686	20.83	0.2069	0.2069	50000	612114	21.1805	13.0769	97.725	4204407	0	50000	14775000	430938	0	1.50812e+07	1.17103e+07	14363.1	9.51088e+06	0					FALSE	0	0	-1	-1	Grey	0
384	Biomass Gasification	Formic Acid	Railcar	FCEV filling	8	10	100	50000	0	0.08	1.6	5.4	511813851	-144968198	>25 years	0.1621	0.1621	50000	612486	22.9539	13.0985	98.1997	3568275	0	50000	15000000	437500	0	1.53202e+07	1.18886e+07	14581.9	9.665e+06	0	300	5000	7.70988e-19	50000	TRUE	0	0	-1	-1	Grey	0
385	Biomass Gasification	Liquid H2	Truck	Fertilizer	9	10	100	50000	0	0.08	1.6	6.48	698453842	-225946892	>25 years	0.0521	0.0521	50000	687159	67.7389	58.1375	185.542	2330408	0	50000	14775000	430938	0	1.69302e+07	1.17103e+07	14363.1	1.13598e+07	0					FALSE	0	0	-1	-1	Grey	0
386	Biomass Gasification	Liquid H2	Truck	FCEV filling	10	10	100	50000	0	0.08	1.6	6.74	705162508	-462279164	>25 years	0.0267	0.0267	50000	691526	73.9912	58.3152	191.176	2033966	0	50000	15000000	437500	0	1.72972e+07	1.18886e+07	14581.9	1.1642e+07	0	300	5000	7.70988e-19	50000	TRUE	0	0	-1	-1	Grey	0
387	Biomass Gasification	Liquid H2	Railcar	Fertilizer	11	10	100	50000	0	0.08	1.6	6.44	697090217	-224969998	>25 years	0.0562	0.0562	50000	686701	67.0959	58.119	184.95	2365298	0	50000	14775000	430938	0	1.69189e+07	1.17103e+07	14363.1	1.13485e+07	0					FALSE	0	0	-1	-1	Grey	0
388	Biomass Gasification	Liquid H2	Railcar	FCEV filling	12	10	100	50000	0	0.08	1.6	6.66	703853427	-456649670	>25 years	0.0342	0.0342	50000	686738	67.2754	58.1211	184.998	2076622	0	50000	15000000	437500	0	1.71775e+07	1.18886e+07	14581.9	1.15223e+07	0	300	5000	7.70988e-19	50000	TRUE	0	0	-1	-1	Grey	0
389	CO2 Electrolysis PV Coupled	Methyl Formate	Pipeline	Fertilizer	13	10	0	50000	0	0.08	1.6	3.95	503711984	63741543	14	0.3088	0.3088	50000	102307	14.4514	6.64772	92.5141	5771722	68.5	50000	14775000	430938	5903.84	2.52064e+06	-850697	14363.1	-3.04969e+06	68.5					FALSE	662977	1.35094e+06	662977	1.35094e+06	Grey	0
390	CO2 Electrolysis PV Coupled	Methyl Formate	Pipeline	FCEV filling	14	10	0	50000	0	0.08	1.6	6.27	1105928952	-716163799	>25 years	0.0739	0.0739	50000	102724	14.7605	6.91136	93.4312	3234694	68.5	50000	15000000	437500	5993.75	2.56944e+06	-866203	14581.9	-3.08572e+06	68.5	300	5000	7.70988e-19	50000	TRUE	670808	1.37151e+06	-1	-1	Grey	0.454353
391	CO2 Electrolysis PV Coupled	Methyl Formate	Railcar	Fertilizer	15	10	0	50000	0	0.08	1.6	3.8	454480518	122829765	12.08	0.324	0.324	50000	102303	14.6067	6.62211	92.4673	5927687	68.5	50000	14775000	430938	5903.84	2.52052e+06	-850431	14363.1	-3.04981e+06	68.5					FALSE	663003	1.35094e+06	663003	1.35094e+06	Grey	0
392	CO2 Electrolysis PV Coupled	Methyl Formate	Railcar	FCEV filling	16	10	0	50000	0	0.08	1.6	4.11	462349519	75868091	13.58	0.2918	0.2918	50000	102674	16.3822	6.64386	92.9425	5495980	68.5	50000	15000000	437500	5993.75	2.5682e+06	-863369	14581.9	-3.08696e+06	68.5	300	5000	7.70988e-19	50000	TRUE	671078	1.37151e+06	671078	1.37151e+06	Grey	0.454133
393	CO2 Electrolysis PV Coupled	Formic Acid	Pipeline	Fertilizer	17	10	0	50000	0	0.08	1.6	5.25	1023152324	-435739589	>25 years	0.177	0.177	50000	6999.5	14.4594	6.65455	92.5379	5555584	273.9	50000	14775000	430938	23606.8	172453	-3.19888e+06	14363.1	-5.39788e+06	273.9					FALSE	1.17345e+06	1.35094e+06	-1	-1	Green	0
394	CO2 Electrolysis PV Coupled	Formic Acid	Pipeline	FCEV filling	18	10	0	50000	0	0.08	1.6	8.04	1737938630	-1412368003	>25 years	0	0	N/A	7518.03	14.8444	6.98271	93.6797	2633247	273.9	1.17567e+08	9.56713e+07	2.79041e+06	152859	1.19939e+06	-2.07134e+07	93004.4	-3.48697e+07	644035	300	4186.34	0.014801	400000	TRUE	7.58037e+06	8.7476e+06	-1	-1	Green	0.0332526
395	CO2 Electrolysis PV Coupled	Formic Acid	Railcar	Fertilizer	19	10	0	50000	0	0.08	1.6	5.12	973974713	-378820411	>25 years	0.1903	0.1903	50000	6983.9	14.6064	6.62209	92.4673	5686763	273.9	50000	14775000	430938	23606.8	172069	-3.19888e+06	14363.1	-5.39826e+06	273.9					FALSE	1.17354e+06	1.35094e+06	-1	-1	Green	0
396	CO2 Electrolysis PV Coupled	Formic Acid	Railcar	FCEV filling	20	10	0	50000	0	0.08	1.6	5.56	976723655	-324810471	>25 years	0.1456	0.1456	50000	7355.12	16.3799	6.6437	92.942	5050604	273.9	50000	15000000	437500	23966.2	183974	-3.2476e+06	14581.9	-5.47119e+06	273.9	300	5000	7.70988e-19	50000	TRUE	1.18939e+06	1.37151e+06	-1	-1	Green	0.0325321
397	CO2 Electrolysis PV Coupled	Methanol	Pipeline	Fertilizer	21	10	0	50000	0	0.08	1.6	7.11	1427231547	-479279980	>25 years	0	0	N/A	3015.23	0.026458	0.022571	0.07848	3913503	273.9	50000	14775000	430938	23606.8	74288.9	-3.29705e+06	14363.1	-5.49604e+06	273.9					FALSE	1.19479e+06	1.35094e+06	-1	-1	Green	0
398	CO2 Electrolysis PV Coupled	Methanol	Pipeline	FCEV filling	22	10	0	50000	0	0.08	1.6	9.44	2030243492	-1872223556	>25 years	0	0	N/A	3351.86	0.276356	0.235755	0.819711	1373214	273.9	1.97894e+06	3.7877e+07	1.10475e+06	60518	211708	-8.46375e+06	36821.2	-1.40683e+07	10840.6	300	4186.34	0.014801	400000	TRUE	3.05833e+06	3.46324e+06	-1	-1	Green	0.0148254
399	CO2 Electrolysis PV Coupled	Methanol	Railcar	Fertilizer	23	10	0	50000	0	0.08	1.6	6.95	1377871699	-897352111	>25 years	0.0053	0.0053	50000	3018.95	0.187993	0.002288	0.050325	4090871	273.9	50000	14775000	430938	23606.8	74380.7	-3.29657e+06	14363.1	-5.49595e+06	273.9					FALSE	1.19477e+06	1.35094e+06	-1	-1	Green	0
400	CO2 Electrolysis PV Coupled	Methanol	Railcar	FCEV filling	24	10	0	50000	0	0.08	1.6	7.14	1385946628	-935129596	>25 years	0	0	50000	3390.78	1.96356	0.023893	0.525644	3844620	273.9	50000	15000000	437500	23966.2	84813.9	-3.34676e+06	14581.9	-5.57035e+06	273.9	300	5000	7.70988e-19	50000	TRUE	1.21094e+06	1.37151e+06	-1	-1	Green	0.0149976
401	N2 Electrolysis PV Coupled	Ammonia	Pipeline	Fertilizer	25	10	0	50000	0	0.08	1.6	3.42	667426743	27917899	15.667	0.3622	0.3622	50000	29.2259	0.021691	0.018492	0.064338	7022412	249.5	50000	14775000	430938	21503.8	720.064	-3.37062e+06	14363.1	-5.56961e+06	249.5					FALSE	1.21079e+06	1.35094e+06	1.21079e+06	1.35094e+06	Green	0
402	N2 Electrolysis PV Coupled	Ammonia	Pipeline	FCEV filling	26	10	0	50000	0	0.08	1.6	7.12	1568162626	-1146836479	>25 years	0	0	N/A	305.261	0.226565	0.193148	0.672009	3254705	249.5	8.57943e+08	4.65859e+08	1.35875e+07	678019	237138	-1.06465e+08	452873	-1.75397e+08	4.28113e+06	300	4186.34	0.014801	400000	TRUE	3.81297e+07	4.25953e+07	-1	-1	Green	0.00135018
403	N2 Electrolysis PV Coupled	Ammonia	Railcar	Fertilizer	27	10	0	50000	0	0.08	1.6	3.26	618821433	88504782	13.91	0.3787	0.3787	50000	8.94212	0.042679	0.000528	0.011422	7200767	249.5	50000	14775000	430938	21503.8	220.315	-3.37073e+06	14363.1	-5.57011e+06	249.5					FALSE	1.21089e+06	1.35094e+06	1.21089e+06	1.35094e+06	Green	0
404	N2 Electrolysis PV Coupled	Ammonia	Railcar	FCEV filling	28	10	0	50000	0	0.08	1.6	4.81	927572580	-327315020	>25 years	0.2217	0.2217	50000	93.3996	0.445778	0.005514	0.119297	5756984	249.5	50000	15000000	437500	21831.2	2336.21	-3.42923e+06	14581.9	-5.65282e+06	249.5	300	5000	7.70988e-19	50000	TRUE	1.22887e+06	1.37151e+06	-1	-1	Green	0.000413111
405	H2O electrolysis PV Coupled	Gas H2	Pipeline	Fertilizer	29	10	0	50000	0	0.08	1.6	4.02	739801192	-79187071	20.75	0.3017	0.3017	50000	17574.2	14.401	3.09453	58.2408	6595490	249.5	50000	14775000	430938	21503.8	432991	-3.19888e+06	14363.1	-5.13734e+06	249.5					FALSE	1.11681e+06	1.35094e+06	-1	-1	Green	0
406	H2O electrolysis PV Coupled	Gas H2	Pipeline	FCEV filling	30	10	0	50000	0	0.08	1.6	6.32	1339169660	-854315660	>25 years	0.0692	0.0692	50000	18392	15.0081	3.61215	60.0415	4088707	249.5	50000	15000000	437500	21831.2	460039	-3.2476e+06	14581.9	-5.19512e+06	249.5	300	5000	7.70988e-19	50000	TRUE	1.12937e+06	1.37151e+06	-1	-1	Green	0.0813485
407	H2O electrolysis PV Coupled	Gas H2	Railcar	Fertilizer	31	10	0	50000	0	0.08	1.6	4.3	705023641	-86590496	22	0.2726	0.2726	50000	18415.5	13.6706	11.6568	40.5477	6173985	249.5	50000	14775000	430938	21503.8	453720	-3.19888e+06	14363.1	-5.11661e+06	249.5					FALSE	1.11231e+06	1.35094e+06	-1	-1	Green	0
408	H2O electrolysis PV Coupled	Gas H2	Railcar	FCEV filling	32	10	0	50000	0	0.08	1.6	8.4	776291776	-751776328	>25 years	0	0	N/A	18417.4	13.6797	11.657	40.55	499150	249.5	1.12816e+07	4.25283e+07	1.24041e+06	61896.4	1.30612e+06	-9.20766e+06	41342.8	-1.47275e+07	56295.1	300	4186.34	0.014801	400000	TRUE	3.20163e+06	3.88853e+06	-1	-1	Green	0.0814611
409	H2O electrolysis PV Coupled	Formic Acid	Pipeline	Fertilizer	33	10	0	50000	0	0.08	1.6	5.75	922142151	-437311460	>25 years	0	0	N/A	146211	14.4594	6.65455	92.5379	4529969	249.5	50000	14775000	430938	21503.8	3.60234e+06	231000	14363.1	-1.968e+06	249.5					FALSE	427825	1.35094e+06	-1	-1	Grey	0
410	H2O electrolysis PV Coupled	Formic Acid	Pipeline	FCEV filling	34	10	0	50000	0	0.08	1.6	8.54	1636897493	-1440707377	>25 years	0	0	N/A	146730	14.8444	6.98271	93.6797	1607758	249.5	2.48379e+06	3.81294e+07	1.11211e+06	55494.2	9.32941e+06	596135	37066.6	-5.04579e+06	12394.1	300	4186.34	0.014801	400000	TRUE	1.09691e+06	3.48632e+06	-1	-1	Grey	0.648992
411	H2O electrolysis PV Coupled	Formic Acid	Railcar	Fertilizer	35	10	0	50000	0	0.08	1.6	5.62	872964541	-380353293	>25 years	0.1398	0.1398	50000	146196	14.6064	6.62209	92.4673	4661149	249.5	50000	14775000	430938	21503.8	3.60195e+06	231000	14363.1	-1.96838e+06	249.5					FALSE	427909	1.35094e+06	-1	-1	Grey	0
412	H2O electrolysis PV Coupled	Formic Acid	Railcar	FCEV filling	36	10	0	50000	0	0.08	1.6	6.06	875682518	-441610293	>25 years	0.0951	0.0951	50000	146567	16.3799	6.6437	92.942	4025115	249.5	50000	15000000	437500	21831.2	3.66609e+06	234518	14581.9	-1.98907e+06	249.5	300	5000	7.70988e-19	50000	TRUE	432407	1.37151e+06	-1	-1	Grey	0.648272
413	H2O electrolysis PV Coupled	Liquid H2	Truck	Fertilizer	37	10	0	50000	0	0.08	1.6	6.36	1104125258	-646700108	>25 years	0.0647	0.0647	50000	82028.8	61.1648	51.6827	180.284	4055362	249.5	50000	14775000	430938	21503.8	2.02102e+06	-3.19888e+06	14363.1	-3.54932e+06	249.5					FALSE	771591	1.35094e+06	-1	-1	Grey	0
414	H2O electrolysis PV Coupled	Liquid H2	Truck	FCEV filling	38	10	0	50000	0	0.08	1.6	6.61	1110833924	-680765183	>25 years	0.0393	0.0393	50000	86395.7	67.4171	51.8604	185.918	3758920	249.5	50000	15000000	437500	21831.2	2.16102e+06	-3.2476e+06	14581.9	-3.49414e+06	249.5	300	5000	7.70988e-19	50000	TRUE	759595	1.37151e+06	-1	-1	Grey	0.382132
415	H2O electrolysis PV Coupled	Liquid H2	Railcar	Fertilizer	39	10	0	50000	0	0.08	1.6	6.32	1102761633	-642058028	>25 years	0.0687	0.0687	50000	81570.4	60.5219	51.6641	179.692	4090252	249.5	50000	14775000	430938	21503.8	2.00972e+06	-3.19888e+06	14363.1	-3.56061e+06	249.5					FALSE	774046	1.35094e+06	-1	-1	Grey	0
416	H2O electrolysis PV Coupled	Liquid H2	Railcar	FCEV filling	40	10	0	50000	0	0.08	1.6	6.54	1109524843	-675126131	>25 years	0.0468	0.0687	50000	81607.8	60.7013	51.6662	179.74	3801576	249.5	50000	15000000	437500	21831.2	2.04126e+06	-3.2476e+06	14581.9	-3.6139e+06	249.5	300	5000	7.70988e-19	50000	TRUE	785630	1.37151e+06	-1	-1	Grey	0.360955
417	SMR	Gas H2	Pipeline	Fertilizer	41	10	6.5	50000	0	0.08	1.6	2.28	1.76292e+08	4.93355e+08	3.33	0.477	0.4593	50000	147410	68.5876	3.09453	177.237	7.17559e+06	0	50000	14775000	430938	0	3.63187e+06		14363.1	-1.93846e+06	0					FALSE	421404	1.35094e+06	421404	1.35094e+06	Grey	0
418	SMR	Gas H2	Pipeline	FCEV filling	42	10	6.5	50000	0	0.08	1.6	4.57	7.75645e+08	-2.78568e+08	>25 years	0.2462	0.2462	50000	148228	69.1947	3.61215	179.038	4.6688e+06	0	50000	15000000	437500	0	3.70764e+06		14581.9	-1.94752e+06	0	300	5000	7.70988e-19	50000	TRUE	423375	1.37151e+06	-1	-1	Grey	0.655619
419	SMR	Gas H2	Railcar	Fertilizer	43	10	6.5	50000	0	0.08	1.6	2.57	1.41515e+08	4.86056e+08	2.92	0.448	0.448	50000	148251	67.8572	11.6568	159.544	6.75408e+06	0	50000	14775000	430938	0	3.6526e+06		14363.1	-1.91773e+06	0					FALSE	416898	1.35094e+06	416898	1.35094e+06	Grey	0
420	SMR	Gas H2	Railcar	FCEV filling	44	10	6.5	50000	0	0.08	1.6	6.66	2.12767e+08	-1.00308e+08	>25 years	0.0344	0.0344	50000	148253	67.8662	11.657	159.547	1.07925e+06	0	50000	15000000	437500	0	3.70827e+06		14581.9	-1.94689e+06	0	300	5000	7.70988e-19	50000	TRUE	423236	1.37151e+06	-1	-1	Grey	0.655731
421	SMR	Formic Acid	Pipeline	Fertilizer	45	10	6.5	50000	0	0.08	1.6	3.03	3.57191e+08	2.7062e+08	7.67	0.402	0.402	50000	136835	68.646	0.0347447	211.535	6.55275e+06	0	50000	14775000	430938	0	3.37134e+06	-260538	14363.1	-2.199e+06	0					FALSE	478043	1.35094e+06	478043	1.35094e+06	Grey	0
422	SMR	Formic Acid	Pipeline	FCEV filling	46	10	6.5	50000	0	0.08	1.6	5.8	1.07195e+09	-6.46738e+08	>25 years	0.1213	0.1213	50000	137354	69.031	0.362905	212.676	3.63054e+06	0	50000	15000000	437500	0	3.43565e+06	-271991	14581.9	-2.21951e+06	0	300	5000	7.70988e-19	50000	TRUE	482503	1.37151e+06	-1	-1	Grey	0.607523
423	SMR	Formic Acid	Railcar	Fertilizer	47	10	6.5	50000	0	0.08	1.6	2.89	3.08013e+08	3.27309e+08	6.42	0.4154	0.4154	50000	136820	68.793	0.00228752	211.464	6.68393e+06	0	50000	14775000	430938	0	3.37095e+06	-281650	14363.1	-2.19938e+06	0					FALSE	478126	1.35094e+06	478126	1.35094e+06	Grey	0
424	SMR	Formic Acid	Railcar	FCEV filling	48	10	6.5	50000	0	0.08	1.6	3.34	3.10731e+08	2.66518e+08	7.25	0.3706	0.3706	50000	137191	70.5665	0.0238929	211.939	6.04789e+06	0	50000	15000000	437500	0	3.43157e+06	-276701	14581.9	-2.22359e+06	0	300	5000	7.70988e-19	50000	TRUE	483389	1.37151e+06	483389	1.37151e+06	Grey	0.606802
425	SMR	Liquid H2	Truck	Fertilizer	49	10	6.5	50000	0	0.08	1.6	4.62	5.40616e+08	-7.12155e+07	19	0.2408	0.2408	50000	211865	115.351	51.6827	299.28	4.63546e+06	0	50000	14775000	430938	0	5.2199e+06	1.58802e+06	14363.1	-350433	0					FALSE	76181.2	1.35094e+06	-1	-1	Grey	0
426	SMR	Liquid H2	Truck	FCEV filling	50	10	6.5	50000	0	0.08	1.6	4.87	5.47325e+08	-1.04946e+08	21.5	0.2154	0.2154	50000	216232	121.604	51.8604	304.915	4.33902e+06	0	50000	15000000	437500	0	5.40862e+06	1.70098e+06	14581.9	-246540	0	300	5000	7.70988e-19	50000	TRUE	53595.6	1.37151e+06	-1	-1	Grey	0.956403
427	SMR	Liquid H2	Railcar	Fertilizer	51	10	6.5	50000	0	0.08	1.6	4.58	5.39253e+08	-6.66249e+07	18.67	0.2449	0.2449	50000	211406	114.708	51.6641	298.689	4.67035e+06	0	50000	14775000	430938	0	5.20861e+06	1.556e+06	14363.1	-361727	0					FALSE	78636.4	1.35094e+06	-1	-1	Grey	0
428	SMR	Liquid H2	Railcar	FCEV filling	52	10	6.5	50000	0	0.08	1.6	4.8	5.46016e+08	-9.94353e+07	20.67	0.2229	0.2229	50000	211444	114.888	51.6662	298.737	4.38167e+06	0	50000	15000000	437500	0	5.28886e+06	1.58059e+06	14581.9	-366299	0	300	5000	7.70988e-19	50000	TRUE	79630.1	1.37151e+06	-1	-1	Grey	0.935226
429	CO Purchase	Methyl Formate	Pipeline	Fertilizer	53	10	0.3	50000	0	0.08	1.6	6.84	258656887	-173510800	>25 years	0.016	0.016	50000	486138	21.0254	13.1026	97.7719	727597	0	50000	14775000	430938	0	1.19774e+07	8.60607e+06	14363.1	6.40708e+06	0					FALSE	0	0	-1	-1	Grey	0
430	CO Purchase	Methyl Formate	Pipeline	FCEV filling	54	10	0.3	50000	0	0.08	1.6	9.15	860842891	-1070545378	>25 years	0	0	N/A	486554	21.3346	13.3662	98.6889	-1809306	0	50000	15000000	437500	0	1.21702e+07	8.73458e+06	14581.9	6.51506e+06	0	300	5000	7.70988e-19	50000	TRUE	0	0	-1	-1	Grey	0
431	CO Purchase	Methyl Formate	Railcar	Fertilizer	55	10	0.3	50000	0	0.08	1.6	6.69	209425422	-114174930	>25 years	0.0312	0.0312	50000	486133	21.1807	13.077	97.7251	883562	0	50000	14775000	430938	0	1.19773e+07	8.60634e+06	14363.1	6.40696e+06	0					FALSE	0	0	-1	-1	Grey	0
432	CO Purchase	Methyl Formate	Railcar	FCEV filling	56	10	0.3	50000	0	0.08	1.6	7.01	217263458	-162022792	>25 years	0	0	N/A	486505	22.9563	13.0987	98.2002	451981	0	6.08374e+07	6.73062e+07	1.9631e+06	0	5.46032e+07	3.92055e+07	65430.1	2.92281e+07	0	300	4186.34	0.014801	400000	TRUE	0	0	-1	-1	Grey	0
433	CO Purchase	Formic Acid	Pipeline	Fertilizer	57	10	0.3	50000	0	0.08	1.6	5.53	255103081	5517775	14.58	0.149	0.149	50000	390830	21.0335	13.1094	97.7956	2640710	0	50000	14775000	430938	0	9.62922e+06	6.25789e+06	14363.1	4.05889e+06	0					FALSE	0	0	0	0	Grey	0
434	CO Purchase	Formic Acid	Pipeline	FCEV filling	58	10	0.3	50000	0	0.08	1.6	8.3	969851800	-984071870	>25 years	0	0	N/A	391348	21.4184	13.4375	98.9374	-281473	0	50000	15000000	437500	0	9.78883e+06	6.35318e+06	14581.9	4.13367e+06	0	300	5000	7.70988e-19	50000	TRUE	0	0	-1	-1	Grey	0
435	CO Purchase	Formic Acid	Railcar	Fertilizer	59	10	0.3	50000	0	0.08	1.6	5.39	205925471	62294358	10.84	0.1625	0.1625	50000	390814	21.1805	13.0769	97.725	2771890	0	50000	14775000	430938	0	9.62884e+06	6.25789e+06	14363.1	4.05851e+06	0					FALSE	0	0	0	0	Grey	0
436	CO Purchase	Formic Acid	Railcar	FCEV filling	60	10	0.3	50000	0	0.08	1.6	5.84	208636825	1402191	15.08	0.1177	0.1177	50000	391185	22.9539	13.0985	98.1997	2135884	0	50000	15000000	437500	0	9.78476e+06	6.35318e+06	14581.9	4.1296e+06	0	300	5000	7.70988e-19	50000	TRUE	0	0	0	0	Grey	0
437	CO Purchase	Methanol	Pipeline	Fertilizer	61	10	0.3	50000	0	0.08	1.6	7.38	659960757	-537937904	>25 years	0	0	N/A	386846	2.7198	3.83784	0.07848	997442	0	50000	14775000	430938	0	9.53106e+06	6.15972e+06	14363.1	3.96073e+06	0					FALSE	0	0	-1	-1	Grey	0
438	CO Purchase	Methanol	Pipeline	FCEV filling	62	10	0.3	50000	0	0.08	1.6	9.7	1262941738	-1444751814	>25 years	0	0	N/A	387182	2.9697	4.05102	0.819711	-1542721	0		#NUM!	#NUM!	#NUM!	#NUM!	#NUM!	#NUM!	#NUM!	0	300	#NUM!	#NUM!	0	TRUE	#NUM!	#NUM!	-1	-1	Grey	#NUM!
439	CO Purchase	Methanol	Railcar	Fertilizer	63	10	0.3	50000	0	0.08	1.6	7.22	610600910	-209722266	>25 years	0	0	N/A	386849	2.88134	3.81755	0.050325	1174810	0	50000	14775000	430938	0	9.53115e+06	6.1602e+06	14363.1	3.96082e+06	0					FALSE	0	0	-1	-1	Grey	0
440	CO Purchase	Methanol	Railcar	FCEV filling	64	10	0.3	50000	0	0.08	1.6	7.41	618644874	-508276765	>25 years	0	0	N/A	387221	4.65691	3.83916	0.525644	928685	0	1.12272e+06	3.74489e+07	1.09226e+06	0	2.4181e+07	1.56138e+07	36405	1.00624e+07	0	300	4186.34	0.014801	400000	TRUE	0	0	-1	-1	Grey	0
441	Biomass Gasification	Gas H2	Pipeline	Fertilizer	1	10	100	50000	0.4	0.08	1.6	3.45	334129776	914983716	7	0.2885	0.4829	137000	622705	20.975	9.54937	63.4985	19046124	0	164384	44660045	1.30258e+06	0	4.63743e+07	3.53963e+07	43415.1	2.9537e+07	0					FALSE	0	0	0	0	Grey	0
442	Biomass Gasification	Gas H2	Pipeline	FCEV filling	2	10	100	50000	0.4	0.08	1.6	3.93	933482049	-154638533	>25 years	0.0575	0.4207	675000	623523	21.5821	10.067	65.2992	105652301	0	50000	15000000	437500	0	1.55962e+07	1.18886e+07	14581.9	9.94107e+06	0	300	5000	7.70988e-19	50000	TRUE	0	0	-1	-1	Grey	0
443	Biomass Gasification	Gas H2	Railcar	Fertilizer	3	10	100	50000	0.4	0.08	1.6	3.78	299352225	855681001	6.92	0.2593	0.4477	135000	623546	20.2447	18.1117	45.8055	17449930	0	164384	44782314	1.30615e+06	0	4.65641e+07	3.54932e+07	43534	2.96807e+07	0					FALSE	0	0	0	0	Grey	0
444	Biomass Gasification	Gas H2	Railcar	FCEV filling	4	10	100	50000	0.4	0.08	1.6	8.53	370604165	-540336713	>25 years	0	0	N/A	623548	20.2537	18.1118	45.8077	-1225804	0	50000	15000000	437500	0	1.55969e+07	1.18886e+07	14581.9	9.9417e+06	0	300	5000	7.70988e-19	50000	TRUE	0	0	-1	-1	Grey	0
445	Biomass Gasification	Formic Acid	Pipeline	Fertilizer	5	10	100	50000	0.4	0.08	1.6	4.06	558290625	318441393	13.67	0.1906	0.408	145000	612130	21.0335	13.1094	97.7956	17620787	0	164384	41804777	1.21931e+06	0	4.26723e+07	3.31333e+07	40639.5	2.69114e+07	0					FALSE	0	0	0	0	Grey	0
446	Biomass Gasification	Formic Acid	Pipeline	FCEV filling	6	10	100	50000	0.4	0.08	1.6	5.16	1273070458	-1128824034	>25 years	0	0.281	246000	612649	21.4184	13.4375	98.9374	17079105	0	50000	15000000	437500	0	1.53242e+07	1.18886e+07	14581.9	9.66908e+06	0	300	5000	7.70988e-19	50000	TRUE	0	0	-1	-1	Grey	0
447	Biomass Gasification	Formic Acid	Railcar	Fertilizer	7	10	100	50000	0.4	0.08	1.6	4.01	509113015	425696716	12.33	0.204	0.416	143000	612114	21.1805	13.0769	97.725	17758857	0	164384	42420182	1.23726e+06	0	4.32993e+07	3.36211e+07	41237.7	2.73065e+07	0					FALSE	0	0	0	0	Grey	0
448	Biomass Gasification	Formic Acid	Railcar	FCEV filling	8	10	100	50000	0.4	0.08	1.6	3.81	511855483	1851657809	15.33	0.1592	0.411	386000	612486	22.9539	13.0985	98.1997	148396507	0	50000	15000000	437500	0	1.53202e+07	1.18886e+07	14581.9	9.665e+06	0	300	5000	7.70988e-19	50000	TRUE	0	0	0	0	Grey	0
449	Biomass Gasification	Liquid H2	Truck	Fertilizer	9	10	100	50000	0.4	0.08	1.6	5.15	698474660	-288133878	>25 years	0.0507	0.254	153000	687159	67.7389	58.1375	185.542	12789360	0	164384	37113869	1.08249e+06	0	4.25275e+07	2.94154e+07	36079.3	2.85352e+07	0					FALSE	0	0	-1	-1	Grey	0
450	Biomass Gasification	Liquid H2	Truck	FCEV filling	10	10	100	50000	0.4	0.08	1.6	4.59	705183326	39360061	>25 years	0.0253	0.324	666000	691526	73.9912	58.3152	191.176	98523387	0	50000	15000000	437500	0	1.72972e+07	1.18886e+07	14581.9	1.1642e+07	0	300	5000	7.70988e-19	50000	TRUE	0	0	0	0	Grey	0
451	Biomass Gasification	Liquid H2	Railcar	Fertilizer	11	10	100	50000	0.4	0.08	1.6	5.12	697111034	-277429131	>25 years	0.0547	0.253	153000	686701	67.0959	58.119	184.95	12896124	0	164384	37231538	1.08592e+06	0	4.26339e+07	2.95087e+07	36193.7	2.85972e+07	0					FALSE	0	0	-1	-1	Grey	0
452	Biomass Gasification	Liquid H2	Railcar	FCEV filling	12	10	100	50000	0.4	0.08	1.6	4.54	703874244	81225438	>25 years	0.0328	0.33	643000	686738	67.2754	58.1211	184.998	100707205	0	50000	15000000	437500	0	1.71775e+07	1.18886e+07	14581.9	1.15223e+07	0	300	5000	7.70988e-19	50000	TRUE	0	0	0	0	Grey	0
453	CO2 Electrolysis PV Coupled	Methyl Formate	Pipeline	Fertilizer	13	10	0	50000	0.4	0.08	1.6	2.96	503732802	905318851	8.83	0.3074	0.561	138000	102307	14.4514	6.64772	92.5141	22963216	68.5	164384	44019646	1.28391e+06	17589.5	7.50982e+06	-2.53451e+06	42792.6	-9.08605e+06	225.205					FALSE	1.97523e+06	4.02489e+06	1.97523e+06	4.02489e+06	Grey	0
454	CO2 Electrolysis PV Coupled	Methyl Formate	Pipeline	FCEV filling	14	10	0	50000	0.4	0.08	1.6	3.22	1105949769	85121345	>25 years	0.0725	0.513	662000	102724	14.7605	6.91136	93.4312	149909321	68.5	50000	15000000	437500	5993.75	2.56944e+06	-866203	14581.9	-3.08572e+06	68.5	300	5000	7.70988e-19	50000	TRUE	670808	1.37151e+06	670808	1.37151e+06	Grey	0.454353
455	CO2 Electrolysis PV Coupled	Methyl Formate	Railcar	Fertilizer	15	10	0	50000	0.4	0.08	1.6	2.88	454501336	1031999431	7.83	0.3225	0.571	137000	102303	14.6067	6.62211	92.4673	23182598	68.5	164384	44482892	1.29742e+06	17774.6	7.5885e+06	-2.56038e+06	43242.9	-9.18203e+06	225.205					FALSE	1.99609e+06	4.06724e+06	1.99609e+06	4.06724e+06	Grey	0
456	CO2 Electrolysis PV Coupled	Methyl Formate	Railcar	FCEV filling	16	10	0	50000	0.4	0.08	1.6	2.55	462370337	3828821140	9.33	0.2904	0.561	226000	102674	16.3822	6.64386	92.9425	201052719	68.5	50000	15000000	437500	5993.75	2.5682e+06	-863369	14581.9	-3.08696e+06	68.5	300	5000	7.70988e-19	50000	TRUE	671078	1.37151e+06	671078	1.37151e+06	Grey	0.454133
457	CO2 Electrolysis PV Coupled	Formic Acid	Pipeline	Fertilizer	17	10	0	50000	0.4	0.08	1.6	3.22	1023173141	179682860	17.17	0.1755	0.521	148000	6999.5	14.4594	6.65455	92.5379	25356604	273.9	164384	41467863	1.20948e+06	66255.3	484010	-8.97806e+06	40311.9	-1.51498e+07	900.493					FALSE	3.29344e+06	3.79157e+06	3.29344e+06	3.79157e+06	Green	0
458	CO2 Electrolysis PV Coupled	Formic Acid	Pipeline	FCEV filling	18	10	0	50000	0.4	0.08	1.6	3.17	1737959447	-1230615511	>25 years	0	0.562	768000	7518.03	14.8444	6.98271	93.6797	90484084	273.9	50000	15000000	437500	23966.2	188049	-3.2476e+06	14581.9	-5.46711e+06	273.9	300	5000	7.70988e-19	50000	TRUE	1.1885e+06	1.37151e+06	-1	-1	Green	0.0332526
459	CO2 Electrolysis PV Coupled	Formic Acid	Railcar	Fertilizer	19	10	0	50000	0.4	0.08	1.6	3.16	973995531	287042192	15.67	0.1889	0.529	146000	6983.9	14.6064	6.62209	92.4673	25494674	273.9	164384	41902980	1.22217e+06	66950.5	487999	-9.07227e+06	40734.9	-1.53099e+07	900.493					FALSE	3.32823e+06	3.83135e+06	3.32823e+06	3.83135e+06	Green	0
460	CO2 Electrolysis PV Coupled	Formic Acid	Railcar	FCEV filling	20	10	0	50000	0.4	0.08	1.6	2.36	976744472	2417788961	16.75	0.1441	0.579	391000	7355.12	16.3799	6.6437	92.942	223901587	273.9	50000	15000000	437500	23966.2	183974	-3.2476e+06	14581.9	-5.47119e+06	273.9	300	5000	7.70988e-19	50000	TRUE	1.18939e+06	1.37151e+06	1.18939e+06	1.37151e+06	Green	0.0325321
461	CO2 Electrolysis PV Coupled	Methanol	Pipeline	Fertilizer	21	10	0	50000	0.4	0.08	1.6	4.28	1427252364	-778803508	>25 years	0	0.372	155000	3015.23	0.026458	0.022571	0.07848	22363799	273.9	164384	36742395	1.07165e+06	58705.2	184741	-8.19908e+06	35718.2	-1.36675e+07	900.493					FALSE	2.9712e+06	3.3595e+06	-1	-1	Green	0
462	CO2 Electrolysis PV Coupled	Methanol	Pipeline	FCEV filling	22	10	0	50000	0.4	0.08	1.6	4.95	2030264310	-1906146273	>25 years	0	0.327	220000	3351.86	0.276356	0.235755	0.819711	21507400	273.9	50000	15000000	437500	23966.2	83840.4	-3.3518e+06	14581.9	-5.57132e+06	273.9	300	5000	7.70988e-19	50000	TRUE	1.21116e+06	1.37151e+06	-1	-1	Green	0.0148254
463	CO2 Electrolysis PV Coupled	Methanol	Railcar	Fertilizer	23	10	0	50000	0.4	0.08	1.6	4.21	1377892517	-679031483	>25 years	0.0039	0.38	155000	3018.95	0.187993	0.002288	0.050325	22652909	273.9	164384	37363551	1.08977e+06	59697.6	188097	-8.33649e+06	36322	-1.38984e+07	900.493					FALSE	3.02138e+06	3.41629e+06	-1	-1	Green	0
464	CO2 Electrolysis PV Coupled	Methanol	Railcar	FCEV filling	24	10	0	50000	0.4	0.08	1.6	2.74	1385967446	136417993	24.83	0	0.56	647000	3390.78	1.96356	0.023893	0.525644	192723450	273.9	50000	15000000	437500	23966.2	84813.9	-3.34676e+06	14581.9	-5.57035e+06	273.9	300	5000	7.70988e-19	50000	TRUE	1.21094e+06	1.37151e+06	1.21094e+06	1.37151e+06	Green	0.0149976
465	N2 Electrolysis PV Coupled	Ammonia	Pipeline	Fertilizer	25	10	0	50000	0.4	0.08	1.6	2.03	667447561	1154089865	8.42	0.3607	0.679	137000	29.2259	0.021691	0.018492	0.064338	28061165	249.5	164384	44545817	1.29925e+06	64832.7	2170.95	-1.01622e+07	43304.1	-1.67921e+07	820.274					FALSE	3.65045e+06	4.073e+06	3.65045e+06	4.073e+06	Green	0
466	N2 Electrolysis PV Coupled	Ammonia	Pipeline	FCEV filling	26	10	0	50000	0.4	0.08	1.6	2.7	1568183444	-596682569	>25 years	0	0.59	733000	305.261	0.226565	0.193148	0.672009	149275707	249.5	50000	15000000	437500	21831.2	7635.53	-3.42801e+06	14581.9	-5.64752e+06	249.5	300	5000	7.70988e-19	50000	TRUE	1.22772e+06	1.37151e+06	-1	-1	Green	0.00135018
467	N2 Electrolysis PV Coupled	Ammonia	Railcar	Fertilizer	27	10	0	50000	0.4	0.08	1.6	1.93	618842251	1289414311	7.58	0.3772	0.698	131000	8.94212	0.042679	0.000528	0.011422	28358038	249.5	164384	44922601	1.31024e+06	65381.1	669.856	-1.02485e+07	43670.4	-1.69356e+07	820.274					FALSE	3.68166e+06	4.10745e+06	3.68166e+06	4.10745e+06	Green	0
468	N2 Electrolysis PV Coupled	Ammonia	Railcar	FCEV filling	28	10	0	50000	0.4	0.08	1.6	1.87	927593397	3169096599	14.67	0.2202	0.645	357000	93.3996	0.445778	0.005514	0.119297	241136944	249.5	50000	15000000	437500	21831.2	2336.21	-3.42923e+06	14581.9	-5.65282e+06	249.5	300	5000	7.70988e-19	50000	TRUE	1.22887e+06	1.37151e+06	1.22887e+06	1.37151e+06	Green	0.000413111
469	H2O electrolysis PV Coupled	Gas H2	Pipeline	Fertilizer	29	10	0	50000	0.4	0.08	1.6	2.47	739822010	899898063	10.25	0.3003	0.626	140000	17574.2	14.401	3.09453	58.2408	27087790	249.5	164384	43889135	1.2801e+06	63877	1.2862e+06	-9.50228e+06	42665.7	-1.52605e+07	820.274					FALSE	3.31749e+06	4.01295e+06	3.31749e+06	4.01295e+06	Green	0
470	H2O electrolysis PV Coupled	Gas H2	Pipeline	FCEV filling	30	10	0	50000	0.4	0.08	1.6	2.42	1339190478	510660176	23.33	0.0678	0.609	614000	18392	15.0081	3.61215	60.0415	201836526	249.5	50000	15000000	437500	21831.2	460039	-3.2476e+06	14581.9	-5.19512e+06	249.5	300	5000	7.70988e-19	50000	TRUE	1.12937e+06	1.37151e+06	1.12937e+06	1.37151e+06	Green	0.0813485
471	H2O electrolysis PV Coupled	Gas H2	Railcar	Fertilizer	31	10	0	50000	0.4	0.08	1.6	2.79	705044458	829381359	10.5	0.2712	0.564	124000	18415.5	13.6706	11.6568	40.5477	25491596	249.5	164384	43614532	1.27209e+06	63477.3	1.33934e+06	-9.44283e+06	42398.8	-1.51038e+07	820.274					FALSE	3.28343e+06	3.98785e+06	3.28343e+06	3.98785e+06	Green	0
472	H2O electrolysis PV Coupled	Gas H2	Railcar	FCEV filling	32	10	0	50000	0.4	0.08	1.6	5.79	776312593	-712434008	>25 years	0	0.184	537000	18417.4	13.6797	11.657	40.55	22945005	249.5	50000	15000000	437500	21831.2	460676	-3.2476e+06	14581.9	-5.19448e+06	249.5	300	5000	7.70988e-19	50000	TRUE	1.12924e+06	1.37151e+06	-1	-1	Green	0.0814611
473	H2O electrolysis PV Coupled	Formic Acid	Pipeline	Fertilizer	33	10	0	50000	0.4	0.08	1.6	3.88	922162968	48442575	18.58	0.125	0.429	149000	146211	14.4594	6.65455	92.5379	21374722	249.5	164384	41048816	1.19726e+06	59743.1	1.00082e+07	641778	39904.6	-5.46761e+06	820.274					FALSE	1.18861e+06	3.75325e+06	1.18861e+06	3.75325e+06	Grey	0
474	H2O electrolysis PV Coupled	Formic Acid	Pipeline	FCEV filling	34	10	0	50000	0.4	0.08	1.6	4.37	1636918310	-1424995220	>25 years	0	0.397	383000	146730	14.8444	6.98271	93.6797	35862853	249.5	50000	15000000	437500	21831.2	3.67016e+06	234518	14581.9	-1.985e+06	249.5	300	5000	7.70988e-19	50000	TRUE	431521	1.37151e+06	-1	-1	Grey	0.648992
475	H2O electrolysis PV Coupled	Formic Acid	Railcar	Fertilizer	35	10	0	50000	0.4	0.08	1.6	3.82	872985358	154574389	17.17	0.1384	0.434	149000	146196	14.6064	6.62209	92.4673	21512791	249.5	164384	41572529	1.21253e+06	60505.4	1.01348e+07	649966	40413.7	-5.53845e+06	820.274					FALSE	1.20401e+06	3.80114e+06	1.20401e+06	3.80114e+06	Grey	0
476	H2O electrolysis PV Coupled	Formic Acid	Railcar	FCEV filling	36	10	0	50000	0.4	0.08	1.6	3.14	875703335	1779976175	17.75	0.0937	0.483	426000	146567	16.3799	6.6437	92.942	187048873	249.5	50000	15000000	437500	21831.2	3.66609e+06	234518	14581.9	-1.98907e+06	249.5	300	5000	7.70988e-19	50000	TRUE	432407	1.37151e+06	432407	1.37151e+06	Grey	0.648272
477	H2O electrolysis PV Coupled	Liquid H2	Truck	Fertilizer	37	10	0	50000	0.4	0.08	1.6	4.16	1104146076	-324782024	24.67	0.0632	0.39	152000	82028.8	61.1648	51.6827	180.284	20899467	249.5	164384	39049263	1.13894e+06	56832.9	5.3414e+06	-8.45442e+06	37960.8	-9.38059e+06	820.274					FALSE	2.03926e+06	3.57043e+06	-1	-1	Grey	0
478	H2O electrolysis PV Coupled	Liquid H2	Truck	FCEV filling	38	10	0	50000	0.4	0.08	1.6	3.05	1110854742	805002907	21.75	0.0379	0.507	569000	86395.7	67.4171	51.8604	185.918	187486703	249.5	50000	15000000	437500	21831.2	2.16102e+06	-3.2476e+06	14581.9	-3.49414e+06	249.5	300	5000	7.70988e-19	50000	TRUE	759595	1.37151e+06	759595	1.37151e+06	Grey	0.382132
479	H2O electrolysis PV Coupled	Liquid H2	Railcar	Fertilizer	39	10	0	50000	0.4	0.08	1.6	4.13	1102782450	-313376315	24.33	0.0673	0.394	151000	81570.4	60.5219	51.6641	179.692	21006231	249.5	164383	38913740	1.13498e+06	56635.7	5.29312e+06	-8.42508e+06	37829	-9.37778e+06	820.273					FALSE	2.03865e+06	3.55803e+06	-1	-1	Grey	0
480	H2O electrolysis PV Coupled	Liquid H2	Railcar	FCEV filling	40	10	0	50000	0.4	0.08	1.6	3.01	1109545660	852947779	21.83	0.0453	0.515	549000	81607.8	60.7013	51.6662	179.74	189006606	249.5	50000	15000000	437500	21831.2	2.04126e+06	-3.2476e+06	14581.9	-3.6139e+06	249.5	300	5000	7.70988e-19	50000	TRUE	785630	1.37151e+06	785630	1.37151e+06	Grey	0.360955
481	SMR	Gas H2	Pipeline	Fertilizer	41	10	6.5	50000	0.4	0.08	1.6	1.81	1.76292e+08	1.86758e+09	2.75	0.477	0.719	96000	147410	68.5876	3.09453	177.237	2.56981e+07	0	164384	46619035	1.35972e+06	0	1.14595e+07		45319.5	-6.11635e+06	0					FALSE	1.32964e+06	4.26256e+06	1.32964e+06	4.26256e+06	Grey	0
482	SMR	Gas H2	Pipeline	FCEV filling	42	10	6.5	50000	0.4	0.08	1.6	2.52	7.75645e+08	2.12604e+09	16.75	0.2462	0.599	435000	148228	69.1947	3.61215	179.038	1.9791e+08	0	50000	15000000	437500	0	3.70764e+06		14581.9	-1.94752e+06	0	300	5000	7.70988e-19	50000	TRUE	423375	1.37151e+06	423375	1.37151e+06	Grey	0.655619
483	SMR	Gas H2	Railcar	Fertilizer	43	10	6.5	50000	0.4	0.08	1.6	2.13	1.41515e+08	1.81332e+09	2.33	0.448	0.669	86000	148251	67.8572	11.6568	159.544	2.4102e+07	0	164384	46808758	1.36526e+06	0	1.15718e+07		45504	-6.07557e+06	0					FALSE	1.32078e+06	4.27991e+06	1.32078e+06	4.27991e+06	Grey	0
484	SMR	Gas H2	Railcar	FCEV filling	44	10	6.5	50000	0.4	0.08	1.6	5.77	2.12767e+08	7.08512e+08	15.17	0.0344	0.15	358000	148253	67.8662	11.657	159.547	5.78359e+07	0	50000	15000000	437500	0	3.70827e+06		14581.9	-1.94689e+06	0	300	5000	7.70988e-19	50000	TRUE	423236	1.37151e+06	423236	1.37151e+06	Grey	0.655731
485	SMR	Formic Acid	Pipeline	Fertilizer	45	10	6.5	50000	0.4	0.08	1.6	2.3	3.57191e+08	1.34448e+09	5.92	0.402	0.656	129000	136835	68.646	0.0347447	211.535	2.47281e+07	0	164384	45171830	1.31751e+06	0	1.03072e+07	-796546	43912.7	-6.72302e+06	0					FALSE	1.46153e+06	4.13024e+06	1.46153e+06	4.13024e+06	Grey	0
486	SMR	Formic Acid	Pipeline	FCEV filling	46	10	6.5	50000	0.4	0.08	1.6	2.93	1.07195e+09	3.82652e+08	23.83	0.1213	0.552	633000	137354	69.031	0.362905	212.676	1.65551e+08	0	50000	15000000	437500	0	3.43565e+06	-271991	14581.9	-2.21951e+06	0	300	5000	7.70988e-19	50000	TRUE	482503	1.37151e+06	482503	1.37151e+06	Grey	0.607523
487	SMR	Formic Acid	Railcar	Fertilizer	47	10	6.5	50000	0.4	0.08	1.6	2.23	3.08013e+08	1.47081e+09	5.08	0.4154	0.664	124000	136820	68.793	0.00228752	211.464	2.48662e+07	0	164384	45579956	1.32942e+06	0	1.03992e+07	-868873	44309.4	-6.78495e+06	0					FALSE	1.47499e+06	4.16755e+06	1.47499e+06	4.16755e+06	Grey	0
488	SMR	Formic Acid	Railcar	FCEV filling	48	10	6.5	50000	0.4	0.08	1.6	2.25	3.10731e+08	4.59842e+09	6	0.3706	0.607	136000	137191	70.5665	0.0238929	211.939	2.06514e+08	0	50000	15000000	437500	0	3.43157e+06	-276701	14581.9	-2.22359e+06	0	300	5000	7.70988e-19	50000	TRUE	483389	1.37151e+06	483389	1.37151e+06	Grey	0.606802
489	SMR	Liquid H2	Truck	Fertilizer	49	10	6.5	50000	0.4	0.08	1.6	3.6	5.40616e+08	5.11358e+08	11.67	0.2408	0.473	143000	211865	115.351	51.6827	299.28	1.95098e+07	0	164384	42569679	1.24162e+06	0	1.50396e+07	4.57541e+06	41383	-1.00967e+06	0					FALSE	219493	3.89231e+06	219493	3.89231e+06	Grey	0
490	SMR	Liquid H2	Truck	FCEV filling	50	10	6.5	50000	0.4	0.08	1.6	3.19	5.47325e+08	2.46986e+09	13.92	0.2154	0.494	351000	216232	121.604	51.8604	304.915	1.74407e+08	0	50000	15000000	437500	0	5.40862e+06	1.70098e+06	14581.9	-246540	0	300	5000	7.70988e-19	50000	TRUE	53595.6	1.37151e+06	53595.6	1.37151e+06	Grey	0.956403
491	SMR	Liquid H2	Railcar	Fertilizer	51	10	6.5	50000	0.4	0.08	1.6	3.57	5.39253e+08	5.23772e+08	11.5	0.2449	0.479	144000	211406	114.708	51.6641	298.689	1.96166e+07	0	164384	42612938	1.24288e+06	0	1.50223e+07	4.48771e+06	41425.1	-1.04327e+06	0					FALSE	226797	3.89627e+06	226797	3.89627e+06	Grey	0
492	SMR	Liquid H2	Railcar	FCEV filling	52	10	6.5	50000	0.4	0.08	1.6	3.14	5.46016e+08	2.52202e+09	13.67	0.2229	0.502	348000	211444	114.888	51.6662	298.737	1.75552e+08	0	50000	15000000	437500	0	5.28886e+06	1.58059e+06	14581.9	-366299	0	300	5000	7.70988e-19	50000	TRUE	79630.1	1.37151e+06	79630.1	1.37151e+06	Grey	0.935226
493	CO Purchase	Methyl Formate	Pipeline	Fertilizer	53	10	0.3	50000	0.4	0.08	1.6	6.23	258677705	-90165504	22.75	0.0146	0.104	151000	486138	21.0254	13.1026	97.7719	4884650	0	164384	37776662	1.10182e+06	0	3.06238e+07	2.2004e+07	36723.6	1.63816e+07	0					FALSE	0	0	-1	-1	Grey	0
494	CO Purchase	Methyl Formate	Pipeline	FCEV filling	54	10	0.3	50000	0.4	0.08	1.6	9.17	860863708	-1073254956	>25 years	0	0	N/A	486554	21.3346	13.3662	98.6889	-1830123	0	50000	15000000	437500	0	1.21702e+07	8.73458e+06	14581.9	6.51506e+06	0	300	5000	7.70988e-19	50000	TRUE	0	0	-1	-1	Grey	0
495	CO Purchase	Methyl Formate	Railcar	Fertilizer	55	10	0.3	50000	0.4	0.08	1.6	6.16	209446239	17552839	16.67	0.0297	0.114	141000	486133	21.1807	13.077	97.7251	5104033	0	164384	40593665	1.18398e+06	0	3.29071e+07	2.36455e+07	39462.1	1.76028e+07	0					FALSE	0	0	0	0	Grey	0
496	CO Purchase	Methyl Formate	Railcar	FCEV filling	56	10	0.3	50000	0.4	0.08	1.6	6.16	217284276	110224056	22.08	0	0.109	548000	486505	22.9563	13.0987	98.2002	36374934	0	50000	15000000	437500	0	1.2169e+07	8.73741e+06	14581.9	6.51382e+06	0	300	5000	7.70988e-19	50000	TRUE	0	0	0	0	Grey	0
497	CO Purchase	Formic Acid	Pipeline	Fertilizer	57	10	0.3	50000	0.4	0.08	1.6	4.95	255123898	423831194	8.83	0.1476	0.283	135000	390830	21.0335	13.1094	97.7956	11164530	0	164384	43872230	1.27961e+06	0	2.85926e+07	1.85819e+07	42649.3	1.20523e+07	0					FALSE	0	0	0	0	Grey	0
498	CO Purchase	Formic Acid	Pipeline	FCEV filling	58	10	0.3	50000	0.4	0.08	1.6	8.31	969872618	-986781447	>25 years	0	0	N/A	391348	21.4184	13.4375	98.9374	-302291	0	50000	15000000	437500	0	9.78883e+06	6.35318e+06	14581.9	4.13367e+06	0	300	5000	7.70988e-19	50000	TRUE	0	0	-1	-1	Grey	0
499	CO Purchase	Formic Acid	Railcar	Fertilizer	59	10	0.3	50000	0.4	0.08	1.6	4.89	205946288	545890407	6.92	0.161	0.289	130000	390814	21.1805	13.0769	97.725	11302600	0	164384	44834706	1.30768e+06	0	2.92187e+07	1.89895e+07	43584.9	1.23155e+07	0					FALSE	0	0	0	0	Grey	0
500	CO Purchase	Formic Acid	Railcar	FCEV filling	60	10	0.3	50000	0.4	0.08	1.6	5.03	208657643	1645165756	9.35	0.1163	0.248	222000	391185	22.9539	13.0985	98.1997	87241534	0	50000	15000000	437500	0	9.78476e+06	6.35318e+06	14581.9	4.1296e+06	0	300	5000	7.70988e-19	50000	TRUE	0	0	0	0	Grey	0
501	CO Purchase	Methanol	Pipeline	Fertilizer	61	10	0.3	50000	0.4	0.08	1.6	6.01	659981575	-521184813	>25 years	0	0.133	156000	386846	2.7198	3.83784	0.07848	8169541	0	164383	31111499	907419	0	2.00694e+07	1.29704e+07	30244.3	8.34004e+06	0					FALSE	0	0	-1	-1	Grey	0
502	CO Purchase	Methanol	Pipeline	FCEV filling	62	10	0.3	50000	0.4	0.08	1.6	9.71	1262941738	-1444751814	>25 years	0	0	N/A	387182	2.9697	4.05102	0.819711	-1542721	0	50000	15000000	437500	0	9.68462e+06	6.24898e+06	14581.9	4.02946e+06	0	300	5000	7.70988e-19	50000	TRUE	0	0	-1	-1	Grey	0
503	CO Purchase	Methanol	Railcar	Fertilizer	63	10	0.3	50000	0.4	0.08	1.6	5.95	610621727	-434159328	>25 years	0	0.144	155000	386849	2.88134	3.81755	0.050325	8458666	0	164384	33196069	968219	0	2.14143e+07	1.38406e+07	32270.7	8.89906e+06	0					FALSE	0	0	-1	-1	Grey	0
504	CO Purchase	Methanol	Railcar	FCEV filling	64	10	0.3	50000	0.4	0.08	1.6	5.53	618665692	-447708556	>25 years	0	0.216	709000	387221	4.65691	3.83916	0.525644	32751531	0	50000	15000000	437500	0	9.6856e+06	6.25403e+06	14581.9	4.03044e+06	0	300	5000	7.70988e-19	50000	TRUE	0	0	-1	-1	Grey	0
505	Biomass Gasification	Gas H2	Pipeline	Fertilizer	1	10	100	50000	0.2	0.06	1.6	3.46	334150594	1215929697	7.17	0.287	0.484	115000	622705	20.975	9.54937	63.4985	18977682	0	164384	44306268	1.29227e+06	0	4.6007e+07	3.51159e+07	43071.2	2.9303e+07	0					FALSE	0	0	0	0	Grey	0
506	Biomass Gasification	Gas H2	Pipeline	FCEV filling	2	10	100	50000	0.2	0.06	1.6	4	933502866	168367742	>25 years	0.056	0.401	459000	623523	21.5821	10.067	65.2992	79517602	0	50000	15000000	437500	0	1.55962e+07	1.18886e+07	14581.9	9.94107e+06	0	300	5000	7.70988e-19	50000	TRUE	0	0	0	0	Grey	0
507	Biomass Gasification	Gas H2	Railcar	Fertilizer	3	10	100	50000	0.2	0.06	1.6	3.79	299373042	1127241267	7	0.2579	0.436	115000	623546	20.2447	18.1117	45.8055	17381488	0	164384	44417837	1.29552e+06	0	4.61851e+07	3.52044e+07	43179.7	2.94391e+07	0					FALSE	0	0	0	0	Grey	0
508	Biomass Gasification	Gas H2	Railcar	FCEV filling	4	10	100	50000	0.2	0.06	1.6	8.54	370624982	-576993326	>25 years	0	0	N/A	623548	20.2537	18.1118	45.8077	-1246621	0	50000	15000000	437500	0	1.55969e+07	1.18886e+07	14581.9	9.9417e+06	0	300	5000	7.70988e-19	50000	TRUE	0	0	-1	-1	Grey	0
509	Biomass Gasification	Formic Acid	Pipeline	Fertilizer	5	10	100	50000	0.2	0.06	1.6	4.06	558290625	586199236	13.75	0.1906	0.398	134000	612130	21.0335	13.1094	97.7956	17620779	0	164384	41570975	1.21249e+06	0	4.24336e+07	3.2948e+07	40412.2	2.67609e+07	0					FALSE	0	0	0	0	Grey	0
510	Biomass Gasification	Formic Acid	Pipeline	FCEV filling	6	10	100	50000	0.2	0.06	1.6	5.16	1273070458	-1036862768	>25 years	0	0.281	246000	612649	21.4184	13.4375	98.9374	17079105	0	50000	15000000	437500	0	1.53242e+07	1.18886e+07	14581.9	9.66908e+06	0	300	5000	7.70988e-19	50000	TRUE	0	0	-1	-1	Grey	0
511	Biomass Gasification	Formic Acid	Railcar	Fertilizer	7	10	100	50000	0.2	0.06	1.6	4	509113015	697848683	12.33	0.204	0.406	132000	612114	21.1805	13.0769	97.725	17758852	0	164384	42171896	1.23001e+06	0	4.30459e+07	3.34243e+07	40996.4	2.71467e+07	0					FALSE	0	0	0	0	Grey	0
512	Biomass Gasification	Formic Acid	Railcar	FCEV filling	8	10	100	50000	0.2	0.06	1.6	3.84	511855483	2276027447	15	0.1592	0.4	276000	612486	22.9539	13.0985	98.1997	111527101	0	50000	15000000	437500	0	1.53202e+07	1.18886e+07	14581.9	9.665e+06	0	300	5000	7.70988e-19	50000	TRUE	0	0	0	0	Grey	0
513	Biomass Gasification	Liquid H2	Truck	Fertilizer	9	10	100	50000	0.2	0.06	1.6	5.15	698474660	-123405798	>25 years	0.0507	0.248	143000	687159	67.7389	58.1375	185.542	12789199	0	164383	36936293	1.07731e+06	0	4.2324e+07	2.92747e+07	35906.7	2.83986e+07	0					FALSE	0	0	-1	-1	Grey	0
514	Biomass Gasification	Liquid H2	Truck	FCEV filling	10	10	100	50000	0.2	0.06	1.6	4.64	705183326	311192104	>25 years	0.0253	0.306	440000	691526	73.9912	58.3152	191.176	72695466	0	50000	15000000	437500	0	1.72972e+07	1.18886e+07	14581.9	1.1642e+07	0	300	5000	7.70988e-19	50000	TRUE	0	0	0	0	Grey	0
515	Biomass Gasification	Liquid H2	Railcar	Fertilizer	11	10	100	50000	0.2	0.06	1.6	5.12	697111034	-109552387	>25 years	0.0547	0.253	143000	686701	67.0959	58.119	184.95	12895974	0	164383	37053093	1.08072e+06	0	4.24295e+07	2.93673e+07	36020.2	2.84601e+07	0					FALSE	0	0	-1	-1	Grey	0
516	Biomass Gasification	Liquid H2	Railcar	FCEV filling	12	10	100	50000	0.2	0.06	1.6	4.6	703874244	362097068	24.75	0.0328	0.313	440000	686738	67.2754	58.1211	184.998	74169255	0	50000	15000000	437500	0	1.71775e+07	1.18886e+07	14581.9	1.15223e+07	0	300	5000	7.70988e-19	50000	TRUE	0	0	0	0	Grey	0
517	CO2 Electrolysis PV Coupled	Methyl Formate	Pipeline	Fertilizer	13	10	0	50000	0.2	0.06	1.6	2.96	503732802	1264661402	8.92	0.3074	0.551	122000	102307	14.4514	6.64772	92.5141	22963214	68.5	164384	43711004	1.2749e+06	17466.2	7.45717e+06	-2.51674e+06	42492.6	-9.02235e+06	225.205					FALSE	1.96138e+06	3.99667e+06	1.96138e+06	3.99667e+06	Grey	0
518	CO2 Electrolysis PV Coupled	Methyl Formate	Pipeline	FCEV filling	14	10	0	50000	0.2	0.06	1.6	3.29	1105949769	528239535	24.75	0.0725	0.486	440000	102724	14.7605	6.91136	93.4312	110857633	68.5	50000	15000000	437500	5993.75	2.56944e+06	-866203	14581.9	-3.08572e+06	68.5	300	5000	7.70988e-19	50000	TRUE	670808	1.37151e+06	670808	1.37151e+06	Grey	0.454353
519	CO2 Electrolysis PV Coupled	Methyl Formate	Railcar	Fertilizer	15	10	0	50000	0.2	0.06	1.6	2.87	454501336	1394058035	7.92	0.3225	0.561	119000	102303	14.6067	6.62211	92.4673	23182596	68.5	164384	44148117	1.28765e+06	17640.9	7.53139e+06	-2.54111e+06	42917.5	-9.11292e+06	225.205					FALSE	1.98107e+06	4.03663e+06	1.98107e+06	4.03663e+06	Grey	0
520	CO2 Electrolysis PV Coupled	Methyl Formate	Railcar	FCEV filling	16	10	0	50000	0.2	0.06	1.6	2.58	462370337	4361087013	9.25	0.2904	0.543	166000	102674	16.3822	6.64386	92.9425	152885639	68.5	50000	15000000	437500	5993.75	2.5682e+06	-863369	14581.9	-3.08696e+06	68.5	300	5000	7.70988e-19	50000	TRUE	671078	1.37151e+06	671078	1.37151e+06	Grey	0.454133
521	CO2 Electrolysis PV Coupled	Formic Acid	Pipeline	Fertilizer	17	10	0	50000	0.2	0.06	1.6	3.21	1023173141	540205332	17.17	0.1755	0.507	137000	6999.5	14.4594	6.65455	92.5379	25356589	273.9	164384	41236865	1.20274e+06	65886.2	481314	-8.92805e+06	40087.4	-1.50654e+07	900.493					FALSE	3.27509e+06	3.77045e+06	3.27509e+06	3.77045e+06	Green	0
522	CO2 Electrolysis PV Coupled	Formic Acid	Pipeline	FCEV filling	18	10	0	50000	0.2	0.06	1.6	3.22	1737959447	-920027469	>25 years	0	0.525	519000	7518.03	14.8444	6.98271	93.6797	83197542	273.9	50000	15000000	437500	23966.2	188049	-3.2476e+06	14581.9	-5.46711e+06	273.9	300	5000	7.70988e-19	50000	TRUE	1.1885e+06	1.37151e+06	-1	-1	Green	0.0332526
523	CO2 Electrolysis PV Coupled	Formic Acid	Railcar	Fertilizer	19	10	0	50000	0.2	0.06	1.6	3.15	973995531	652708839	15.75	0.1889	0.516	135000	6983.9	14.6064	6.62209	92.4673	25494663	273.9	164384	41662965	1.21517e+06	66567	485204	-9.0203e+06	40501.6	-1.52222e+07	900.493					FALSE	3.30917e+06	3.80941e+06	3.30917e+06	3.80941e+06	Green	0
524	CO2 Electrolysis PV Coupled	Formic Acid	Railcar	FCEV filling	20	10	0	50000	0.2	0.06	1.6	2.42	976744472	3016938663	16.67	0.1441	0.553	286000	7355.12	16.3799	6.6437	92.942	167896758	273.9	50000	15000000	437500	23966.2	183974	-3.2476e+06	14581.9	-5.47119e+06	273.9	300	5000	7.70988e-19	50000	TRUE	1.18939e+06	1.37151e+06	1.18939e+06	1.37151e+06	Green	0.0325321
525	CO2 Electrolysis PV Coupled	Methanol	Pipeline	Fertilizer	21	10	0	50000	0.2	0.06	1.6	4.28	1427252364	-525724102	>25 years	0	0.36	147000	3015.23	0.026458	0.022571	0.07848	22363440	273.9	164382	36565551	1.0665e+06	58422.6	183852	-8.15962e+06	35546.3	-1.36017e+07	900.487					FALSE	2.9569e+06	3.34333e+06	-1	-1	Green	0
526	CO2 Electrolysis PV Coupled	Methanol	Pipeline	FCEV filling	22	10	0	50000	0.2	0.06	1.6	4.95	2030264310	-1821602000	>25 years	0	0.327	220000	3351.86	0.276356	0.235755	0.819711	21507400	273.9	50000	15000000	437500	23966.2	83840.4	-3.3518e+06	14581.9	-5.57132e+06	273.9	300	5000	7.70988e-19	50000	TRUE	1.21116e+06	1.37151e+06	-1	-1	Green	0.0148254
527	CO2 Electrolysis PV Coupled	Methanol	Railcar	Fertilizer	23	10	0	50000	0.2	0.06	1.6	4.2	1377892517	-415675088	>25 years	0.0039	0.368	147000	3018.95	0.187993	0.002288	0.050325	22652672	273.9	164383	37182516	1.08449e+06	59408.4	187185	-8.29609e+06	36146.1	-1.3831e+07	900.489					FALSE	3.00674e+06	3.39974e+06	-1	-1	Green	0
528	CO2 Electrolysis PV Coupled	Methanol	Railcar	FCEV filling	24	10	0	50000	0.2	0.06	1.6	2.85	1385967446	621352931	>25 years	0	0.524	438000	3390.78	1.96356	0.023893	0.525644	141042314	273.9	50000	15000000	437500	23966.2	84813.9	-3.34676e+06	14581.9	-5.57035e+06	273.9	300	5000	7.70988e-19	50000	TRUE	1.21094e+06	1.37151e+06	1.21094e+06	1.37151e+06	Green	0.0149976
529	N2 Electrolysis PV Coupled	Ammonia	Pipeline	Fertilizer	25	10	0	50000	0.2	0.06	1.6	2.03	667447561	1596866764	8.5	0.3607	0.667	118000	29.2259	0.021691	0.018492	0.064338	28061163	249.5	164384	44201403	1.28921e+06	64331.5	2154.17	-1.00837e+07	42969.3	-1.66622e+07	820.274					FALSE	3.62223e+06	4.04151e+06	3.62223e+06	4.04151e+06	Green	0
530	N2 Electrolysis PV Coupled	Ammonia	Pipeline	FCEV filling	26	10	0	50000	0.2	0.06	1.6	2.8	1568183444	-154991850	>25 years	0	0.556	474000	305.261	0.226565	0.193148	0.672009	114588312	249.5	50000	15000000	437500	21831.2	7635.53	-3.42801e+06	14581.9	-5.64752e+06	249.5	300	5000	7.70988e-19	50000	TRUE	1.22772e+06	1.37151e+06	-1	-1	Green	0.00135018
531	N2 Electrolysis PV Coupled	Ammonia	Railcar	Fertilizer	27	10	0	50000	0.2	0.06	1.6	1.92	618842251	1735184419	7.67	0.3772	0.679	111000	8.94212	0.042679	0.000528	0.011422	28358036	249.5	164384	44549559	1.29936e+06	64838.2	664.294	-1.01634e+07	43307.7	-1.6795e+07	820.274					FALSE	3.65109e+06	4.07334e+06	3.65109e+06	4.07334e+06	Green	0
532	N2 Electrolysis PV Coupled	Ammonia	Railcar	FCEV filling	28	10	0	50000	0.2	0.06	1.6	1.92	927593397	3839499692	14.58	0.2202	0.619	258000	93.3996	0.445778	0.005514	0.119297	181848528	249.5	50000	15000000	437500	21831.2	2336.21	-3.42923e+06	14581.9	-5.65282e+06	249.5	300	5000	7.70988e-19	50000	TRUE	1.22887e+06	1.37151e+06	1.22887e+06	1.37151e+06	Green	0.000413111
533	H2O electrolysis PV Coupled	Gas H2	Pipeline	Fertilizer	29	10	0	50000	0.2	0.06	1.6	2.46	739822010	1313710022	10.33	0.3003	0.609	123000	17574.2	14.401	3.09453	58.2408	27156228	249.5	164384	43582209	1.27115e+06	63430.3	1.2772e+06	-9.43583e+06	42367.4	-1.51538e+07	820.274					FALSE	3.29429e+06	3.98489e+06	3.29429e+06	3.98489e+06	Green	0
534	H2O electrolysis PV Coupled	Gas H2	Pipeline	FCEV filling	30	10	0	50000	0.2	0.06	1.6	2.5	1339190478	1070713483	23.17	0.0678	0.573	411000	18392	15.0081	3.61215	60.0415	147616464	249.5	50000	15000000	437500	21831.2	460039	-3.2476e+06	14581.9	-5.19512e+06	249.5	300	5000	7.70988e-19	50000	TRUE	1.12937e+06	1.37151e+06	1.12937e+06	1.37151e+06	Green	0.0813485
535	H2O electrolysis PV Coupled	Gas H2	Railcar	Fertilizer	31	10	0	50000	0.2	0.06	1.6	2.78	705044458	1225659439	10.5	0.2712	0.564	124000	18415.5	13.6706	11.6568	40.5477	25491593	249.5	164384	43614532	1.27209e+06	63477.3	1.33934e+06	-9.44283e+06	42398.8	-1.51038e+07	820.274					FALSE	3.28343e+06	3.98785e+06	3.28343e+06	3.98785e+06	Green	0
536	H2O electrolysis PV Coupled	Gas H2	Railcar	FCEV filling	32	10	0	50000	0.2	0.06	1.6	5.8	776312593	-665806850	>25 years	0	0.181	510000	18417.4	13.6797	11.657	40.55	22830753	249.5	50000	15000000	437500	21831.2	460676	-3.2476e+06	14581.9	-5.19448e+06	249.5	300	5000	7.70988e-19	50000	TRUE	1.12924e+06	1.37151e+06	-1	-1	Green	0.0814611
537	H2O electrolysis PV Coupled	Formic Acid	Pipeline	Fertilizer	33	10	0	50000	0.2	0.06	1.6	3.88	922162968	346372854	18.17	0.125	0.417	138000	146211	14.4594	6.65455	92.5379	21374705	249.5	164384	40824488	1.19071e+06	59416.6	9.95354e+06	638271	39686.5	-5.43773e+06	820.274					FALSE	1.18212e+06	3.73274e+06	1.18212e+06	3.73274e+06	Grey	0
538	H2O electrolysis PV Coupled	Formic Acid	Pipeline	FCEV filling	34	10	0	50000	0.2	0.06	1.6	4.37	1636918310	-1291723748	>25 years	0	0.397	383000	146730	14.8444	6.98271	93.6797	35862853	249.5	50000	15000000	437500	21831.2	3.67016e+06	234518	14581.9	-1.985e+06	249.5	300	5000	7.70988e-19	50000	TRUE	431521	1.37151e+06	-1	-1	Grey	0.648992
539	H2O electrolysis PV Coupled	Formic Acid	Railcar	Fertilizer	35	10	0	50000	0.2	0.06	1.6	3.8	872964541	464738382	17.17	0.1398	0.421	138000	146196	14.6064	6.62209	92.4673	21581221	249.5	164384	41358563	1.20629e+06	60193.9	1.00827e+07	646621	40205.7	-5.50994e+06	820.274					FALSE	1.19781e+06	3.78157e+06	1.19781e+06	3.78157e+06	Grey	0
540	H2O electrolysis PV Coupled	Formic Acid	Railcar	FCEV filling	36	10	0	50000	0.2	0.06	1.6	3.18	875682518	2291156703	17.58	0.0951	0.454	317000	146567	16.3799	6.6437	92.942	140171914	249.5	50000	15000000	437500	21831.2	3.66609e+06	234518	14581.9	-1.98907e+06	249.5	300	5000	7.70988e-19	50000	TRUE	432407	1.37151e+06	432407	1.37151e+06	Grey	0.648272
541	H2O electrolysis PV Coupled	Liquid H2	Truck	Fertilizer	37	10	0	50000	0.2	0.06	1.6	4.14	1104125258	-47049886	24.58	0.0647	0.374	144000	82028.8	61.1648	51.6827	180.284	20967842	249.5	164383	38883384	1.1341e+06	56591.5	5.31871e+06	-8.41851e+06	37799.5	-9.34074e+06	820.273					FALSE	2.0306e+06	3.55526e+06	-1	-1	Grey	0
542	H2O electrolysis PV Coupled	Liquid H2	Truck	FCEV filling	38	10	0	50000	0.2	0.06	1.6	3.12	1110833924	1309352272	21.91	0.0393	0.475	410000	86395.7	67.4171	51.8604	185.918	138010647	249.5	50000	15000000	437500	21831.2	2.16102e+06	-3.2476e+06	14581.9	-3.49414e+06	249.5	300	5000	7.70988e-19	50000	TRUE	759595	1.37151e+06	759595	1.37151e+06	Grey	0.382132
543	H2O electrolysis PV Coupled	Liquid H2	Railcar	Fertilizer	39	10	0	50000	0.2	0.06	1.6	4.11	1102761633	-32648584	24.25	0.0687	0.374	145000	81570.4	60.5219	51.6641	179.692	21074608	249.5	164383	38943445	1.13585e+06	56678.9	5.29716e+06	-8.43151e+06	37857.9	-9.38494e+06	820.273					FALSE	2.0402e+06	3.56075e+06	-1	-1	Grey	0
544	H2O electrolysis PV Coupled	Liquid H2	Railcar	FCEV filling	40	10	0	50000	0.2	0.06	1.6	3.07	1109524843	1365968816	21.67	0.0468	0.48	410000	81607.8	60.7013	51.6662	179.74	139204905	249.5	50000	15000000	437500	21831.2	2.04126e+06	-3.2476e+06	14581.9	-3.6139e+06	249.5	300	5000	7.70988e-19	50000	TRUE	785630	1.37151e+06	785630	1.37151e+06	Grey	0.360955
545	SMR	Gas H2	Pipeline	Fertilizer	41	10	6.5	50000	0.2	0.06	1.6	1.81	176292286	2.26427e+09	3.33	0.477	0.712	71000	147410	68.5876	3.09453	177.237	25698144	0	164384	45991535	1.34142e+06	0	1.13053e+07		44709.5	-6.03402e+06	0					FALSE	1.31174e+06	4.20518e+06	1.31174e+06	4.20518e+06	Grey	0
546	SMR	Gas H2	Pipeline	FCEV filling	42	10	6.5	50000	0.2	0.06	1.6	2.56	775644559	2.75243e+09	16.25	0.2462	0.577	297000	148228	69.1946	3.61215	179.038	147557326	0	50000	15000000	437500	0	3.70764e+06		14581.9	-1.94752e+06	0	300	5000	7.70988e-19	50000	TRUE	423374	1.37151e+06	423374	1.37151e+06	Grey	0.655619
547	SMR	Gas H2	Railcar	Fertilizer	43	10	6.5	50000	0.2	0.06	1.6	2.13	141514735	2.17449e+09	2.42	0.448	0.652	65000	148251	67.8572	11.6568	159.544	24101950	0	164384	46105786	1.34475e+06	0	1.1398e+07		44820.6	-5.98433e+06	0					FALSE	1.30094e+06	4.21563e+06	1.30094e+06	4.21563e+06	Grey	0
548	SMR	Gas H2	Railcar	FCEV filling	44	10	6.5	50000	0.2	0.06	1.6	5.79	212766675	8.54439e+08	15.08	0.0344	0.143	259000	148253	67.8662	11.657	159.547	43406202	0	50000	15000000	437500	0	3.70827e+06		14581.9	-1.94689e+06	0	300	5000	7.70988e-19	50000	TRUE	423236	1.37151e+06	423236	1.37151e+06	Grey	0.655731
549	SMR	Formic Acid	Pipeline	Fertilizer	45	10	6.5	50000	0.2	0.06	1.6	2.3	357190563	1.74294e+09	5.92	0.402	0.645	109000	136835	68.646	0.034745	211.535	24728138	0	164384	44790327	1.30638e+06	0	1.02202e+07	-789820	43541.8	-6.66624e+06	0					FALSE	1.44918e+06	4.09535e+06	1.44918e+06	4.09535e+06	Grey	0
550	SMR	Formic Acid	Pipeline	FCEV filling	46	10	6.5	50000	0.2	0.06	1.6	3	1071945905	8.8515e+08	23.33	0.1213	0.527	415000	137354	69.031	0.362905	212.676	121764604	0	50000	15000000	437500	0	3.43565e+06	-271992	14581.9	-2.21951e+06	0	300	5000	7.70988e-19	50000	TRUE	482503	1.37151e+06	482503	1.37151e+06	Grey	0.607523
551	SMR	Formic Acid	Railcar	Fertilizer	47	10	6.5	50000	0.2	0.06	1.6	2.23	308012953	1.86732e+09	5.08	0.4154	0.652	102000	136820	68.793	0.002288	211.464	24866208	0	164384	45155282	1.31703e+06	0	1.03023e+07	-860779	43896.6	-6.72174e+06	0					FALSE	1.46125e+06	4.12872e+06	1.46125e+06	4.12872e+06	Grey	0
552	SMR	Formic Acid	Railcar	FCEV filling	48	10	6.5	50000	0.2	0.06	1.6	2.27	310730930	5.12418e+09	6	0.3706	0.595	519000	137191	70.5665	0.023893	211.939	157279637	0	50000	15000000	437500	0	3.43157e+06	-276702	14581.9	-2.22359e+06	0	300	5000	7.70988e-19	50000	TRUE	483389	1.37151e+06	483389	1.37151e+06	Grey	0.606802
553	SMR	Liquid H2	Truck	Fertilizer	49	10	6.5	50000	0.2	0.06	1.6	3.6	540616353	8.19973e+08	11.67	0.2408	0.464	129000	211865	115.351	51.6827	299.28	19509817	0	164384	42317776	1.23427e+06	0	1.49506e+07	4.54834e+06	41138.2	-1.00369e+06	0					FALSE	218194	3.86928e+06	218194	3.86928e+06	Grey	0
554	SMR	Liquid H2	Truck	FCEV filling	50	10	6.5	50000	0.2	0.06	1.6	3.22	547325018	2.98311e+09	13.58	0.2154	0.478	250000	216232	121.604	51.8604	304.915	131607346	0	50000	15000000	437500	0	5.40862e+06	1.70098e+06	14581.9	-246539	0	300	5000	7.70988e-19	50000	TRUE	53595.5	1.37151e+06	53595.5	1.37151e+06	Grey	0.956403
555	SMR	Liquid H2	Railcar	Fertilizer	51	10	6.5	50000	0.2	0.06	1.6	3.56	539252727	8.35308e+08	11.58	0.2449	0.468	131000	211406	114.709	51.6641	298.689	19616581	0	164384	42359404	1.23548e+06	0	1.49329e+07	4.46101e+06	41178.6	-1.03706e+06	0					FALSE	225447	3.87308e+06	225447	3.87308e+06	Grey	0
556	SMR	Liquid H2	Railcar	FCEV filling	52	10	6.5	50000	0.2	0.06	1.6	3.17	546015937	3.04308e+09	13.42	0.2229	0.482	232000	211444	114.888	51.6662	298.737	132518063	0	50000	15000000	437500	0	5.28886e+06	1.58059e+06	14581.9	-366300	0	300	5000	7.70988e-19	50000	TRUE	79630.3	1.37151e+06	79630.3	1.37151e+06	Grey	0.935225
557	CO Purchase	Methyl Formate	Pipeline	Fertilizer	53	10	0.3	50000	0.2	0.06	1.6	6.21	258656887	-18108231	22.33	0.016	0.1	131000	486138	21.0254	13.1026	97.7719	4953058	0	164383	37749296	1.10102e+06	0	3.06016e+07	2.1988e+07	36697	1.63697e+07	0					FALSE	0	0	-1	-1	Grey	0
558	CO Purchase	Methyl Formate	Pipeline	FCEV filling	54	10	0.3	50000	0.2	0.06	1.6	9.15	860842891	-1094078507	>25 years	0	0	N/A	486554	21.3346	13.3662	98.6889	-1809306	0	50000	15000000	437500	0	1.21702e+07	8.73458e+06	14581.9	6.51506e+06	0	300	5000	7.70988e-19	50000	TRUE	0	0	-1	-1	Grey	0
559	CO Purchase	Methyl Formate	Railcar	Fertilizer	55	10	0.3	50000	0.2	0.06	1.6	6.14	209425422	98930503	16.42	0.0312	0.111	128000	486133	21.1807	13.077	97.7251	5172468	0	164383	40476533	1.18057e+06	0	3.28121e+07	2.35773e+07	39348.2	1.7552e+07	0					FALSE	0	0	0	0	Grey	0
560	CO Purchase	Methyl Formate	Railcar	FCEV filling	56	10	0.3	50000	0.2	0.06	1.6	6.16	217263458	216117691	21.58	0	0.101	313000	486505	22.9563	13.0987	98.2002	26917225	0	50000	15000000	437500	0	1.2169e+07	8.73741e+06	14581.9	6.51382e+06	0	300	5000	7.70988e-19	50000	TRUE	0	0	0	0	Grey	0
561	CO Purchase	Formic Acid	Pipeline	Fertilizer	57	10	0.3	50000	0.2	0.06	1.6	4.94	255103081	610374349	8.92	0.149	0.277	115000	390830	21.0335	13.1094	97.7956	11232970	0	164384	43591283	1.27141e+06	0	2.84095e+07	1.84629e+07	42376.2	1.19751e+07	0					FALSE	0	0	0	0	Grey	0
562	CO Purchase	Formic Acid	Pipeline	FCEV filling	58	10	0.3	50000	0.2	0.06	1.6	8.3	969851800	-970151015	>25 years	0	0	N/A	391348	21.4184	13.4375	98.9374	-281473	0	50000	15000000	437500	0	9.78883e+06	6.35318e+06	14581.9	4.13367e+06	0	300	5000	7.70988e-19	50000	TRUE	0	0	-1	-1	Grey	0
563	CO Purchase	Formic Acid	Railcar	Fertilizer	59	10	0.3	50000	0.2	0.06	1.6	4.87	205925471	733763303	6.92	0.1625	0.286	108000	390814	21.1805	13.0769	97.725	11371041	0	164384	44490359	1.29764e+06	0	2.89943e+07	1.88437e+07	43250.2	1.22209e+07	0					FALSE	0	0	0	0	Grey	0
564	CO Purchase	Formic Acid	Railcar	FCEV filling	60	10	0.3	50000	0.2	0.06	1.6	5.03	208636825	1896049751	9.08	0.1177	0.227	178000	391185	22.9539	13.0985	98.1997	66717189	0	50000	15000000	437500	0	9.78476e+06	6.35318e+06	14581.9	4.1296e+06	0	300	5000	7.70988e-19	50000	TRUE	0	0	0	0	Grey	0
565	CO Purchase	Methanol	Pipeline	Fertilizer	61	10	0.3	50000	0.2	0.06	1.6	6	659960757	-444074935	>25 years	0	0.129	150000	386846	2.7198	3.83784	0.07848	8233175	0	164346	31123310	907763	0	2.0077e+07	1.29754e+07	30255.7	8.34321e+06	0					FALSE	0	0	-1	-1	Grey	0
566	CO Purchase	Methanol	Pipeline	FCEV filling	62	10	0.3	50000	0.2	0.06	1.6	9.7	1262941738	-1462831741	>25 years	0	0	N/A	387182	2.9697	4.05102	0.819711	-1542721	0		#DIV/0!	#DIV/0!	#DIV/0!	#DIV/0!	#DIV/0!	#DIV/0!	#DIV/0!	0	#DIV/0!	#NUM!	#NUM!	0	TRUE	#DIV/0!	#DIV/0!	-1	-1	Grey	#DIV/0!
567	CO Purchase	Methanol	Railcar	Fertilizer	63	10	0.3	50000	0.2	0.06	1.6	5.94	610600910	-345292649	>25 years	0	0.137	148000	386849	2.88134	3.81755	0.050325	8525775	0	164373	33170818	967482	0	2.1398e+07	1.383e+07	32246.2	8.89229e+06	0					FALSE	0	0	-1	-1	Grey	0
568	CO Purchase	Methanol	Railcar	FCEV filling	64	10	0.3	50000	0.2	0.06	1.6	5.53	618644874	-327272688	>25 years	0	0.205	505000	387221	4.65691	3.83916	0.525644	31771451	0	50000	15000000	437500	0	9.6856e+06	6.25403e+06	14581.9	4.03044e+06	0	300	5000	7.70988e-19	50000	TRUE	0	0	-1	-1	Grey	0
569	Biomass Gasification	Gas H2	Pipeline	Fertilizer	1	10	100	50000	0.2	0.06	1.6	3.44	334129776	1222929206	7.08	0.2885	0.477	118000	622705	20.975	9.54937	63.4985	19046123	0	164384	44316705	1.29257e+06	0	4.60178e+07	3.51242e+07	43081.4	2.93099e+07	0					FALSE	0	0	0	0	Grey	0
570	Biomass Gasification	Gas H2	Pipeline	FCEV filling	2	10	100	50000	0.2	0.06	1.6	3.99	933482049	184673186	>25 years	0.0575	0.402	443000	623523	21.5821	10.067	65.2992	80284883	0	50000	15000000	437500	0	1.55962e+07	1.18886e+07	14581.9	9.94107e+06	0	300	5000	7.70988e-19	50000	TRUE	0	0	0	0	Grey	0
571	Biomass Gasification	Gas H2	Railcar	Fertilizer	3	10	100	50000	0.2	0.06	1.6	3.77	299352225	1134237660	7	0.2593	0.437	109000	623546	20.2447	18.1117	45.8055	17449929	0	164384	44429165	1.29585e+06	0	4.61969e+07	3.52133e+07	43190.7	2.94466e+07	0					FALSE	0	0	0	0	Grey	0
572	Biomass Gasification	Gas H2	Railcar	FCEV filling	4	10	100	50000	0.2	0.06	1.6	8.53	370604165	-573768719	>25 years	0	0	N/A	623548	20.2537	18.1118	45.8077	-1225804	0	50000	15000000	437500	0	1.55969e+07	1.18886e+07	14581.9	9.9417e+06	0	300	5000	7.70988e-19	50000	TRUE	0	0	-1	-1	Grey	0
573	Biomass Gasification	Formic Acid	Pipeline	Fertilizer	5	10	100	50000	0.2	0.06	1.6	4.03	558248992	599593383	13.58	0.1935	0.403	129000	612130	21.0335	13.1094	97.7956	17757654	0	164384	41617687	1.21385e+06	0	4.24813e+07	3.2985e+07	40457.6	2.6791e+07	0					FALSE	0	0	0	0	Grey	0
574	Biomass Gasification	Formic Acid	Pipeline	FCEV filling	6	10	100	50000	0.2	0.06	1.6	5.1	1273028826	-1025658930	>25 years	0	0.3	257000	612649	21.4184	13.4375	98.9374	18136138	0	50000	15000000	437500	0	1.53242e+07	1.18886e+07	14581.9	9.66908e+06	0	300	5000	7.70988e-19	50000	TRUE	0	0	-1	-1	Grey	0
575	Biomass Gasification	Formic Acid	Railcar	Fertilizer	7	10	100	50000	0.2	0.06	1.6	3.98	509071382	711418332	12.25	0.2069	0.205	131000	612114	21.1805	13.0769	97.725	17895726	0	164384	42212744	1.23121e+06	0	4.30876e+07	3.34567e+07	41036.1	2.71729e+07	0					FALSE	0	0	0	0	Grey	0
576	Biomass Gasification	Formic Acid	Railcar	FCEV filling	8	10	100	50000	0.2	0.06	1.6	3.81	511813851	2316322794	14.92	0.1621	0.393	285000	612486	22.9539	13.0985	98.1997	112479619	0	50000	15000000	437500	0	1.53202e+07	1.18886e+07	14581.9	9.665e+06	0	300	5000	7.70988e-19	50000	TRUE	0	0	0	0	Grey	0
577	Biomass Gasification	Liquid H2	Truck	Fertilizer	9	10	100	50000	0.2	0.06	1.6	5.14	698453842	-117391180	>25 years	0.0521	0.246	145000	687159	67.7389	58.1375	185.542	12857646	0	164383	36997524	1.07909e+06	0	4.23942e+07	2.93232e+07	35966.2	2.84457e+07	0					FALSE	0	0	-1	-1	Grey	0
578	Biomass Gasification	Liquid H2	Truck	FCEV filling	10	10	100	50000	0.2	0.06	1.6	4.63	705162508	328660557	>25 years	0.0267	0.307	432000	691526	73.9912	58.3152	191.176	73386646	0	50000	15000000	437500	0	1.72972e+07	1.18886e+07	14581.9	1.1642e+07	0	300	5000	7.70988e-19	50000	TRUE	0	0	0	0	Grey	0
579	Biomass Gasification	Liquid H2	Railcar	Fertilizer	11	10	100	50000	0.2	0.06	1.6	5.1	697090217	-103526552	>25 years	0.0562	0.252	140000	686701	67.0959	58.119	184.95	12964420	0	164383	37112821	1.08246e+06	0	4.24979e+07	2.94146e+07	36078.3	2.8506e+07	0					FALSE	0	0	-1	-1	Grey	0
580	Biomass Gasification	Liquid H2	Railcar	FCEV filling	12	10	100	50000	0.2	0.06	1.6	4.58	703853427	379837249	24.58	0.0342	0.312	418000	686738	67.2754	58.1211	184.998	74854132	0	50000	15000000	437500	0	1.71775e+07	1.18886e+07	14581.9	1.15223e+07	0	300	5000	7.70988e-19	50000	TRUE	0	0	0	0	Grey	0
581	CO2 Electrolysis PV Coupled	Methyl Formate	Pipeline	Fertilizer	13	10	0	50000	0.2	0.06	1.6	2.94	503711984	1271610955	8.91	0.3088	0.553	122000	102307	14.4514	6.64772	92.5141	23031655	68.5	164384	43722011	1.27523e+06	17470.6	7.45905e+06	-2.51737e+06	42503.3	-9.02462e+06	225.205					FALSE	1.96187e+06	3.99767e+06	1.96187e+06	3.99767e+06	Grey	0
582	CO2 Electrolysis PV Coupled	Methyl Formate	Pipeline	FCEV filling	14	10	0	50000	0.2	0.06	1.6	3.28	1105928952	545694644	24.67	0.0739	0.488	429000	102724	14.7605	6.91136	93.4312	111561584	68.5	50000	15000000	437500	5993.75	2.56944e+06	-866203	14581.9	-3.08572e+06	68.5	300	5000	7.70988e-19	50000	TRUE	670808	1.37151e+06	670808	1.37151e+06	Grey	0.454353
583	CO2 Electrolysis PV Coupled	Methyl Formate	Railcar	Fertilizer	15	10	0	50000	0.2	0.06	1.6	2.86	454480518	1401013119	7.92	0.324	0.561	119000	102303	14.6067	6.62211	92.4673	23251037	68.5	164384	44157111	1.28792e+06	17644.4	7.53292e+06	-2.54163e+06	42926.2	-9.11478e+06	225.205					FALSE	1.98147e+06	4.03746e+06	1.98147e+06	4.03746e+06	Grey	0
584	CO2 Electrolysis PV Coupled	Methyl Formate	Railcar	FCEV filling	16	10	0	50000	0.2	0.06	1.6	2.57	462349519	4379865060	9.17	0.2918	0.526	174000	102674	16.3822	6.64386	92.9425	153338719	68.5	50000	15000000	437500	5993.75	2.5682e+06	-863369	14581.9	-3.08696e+06	68.5	300	5000	7.70988e-19	50000	TRUE	671078	1.37151e+06	671078	1.37151e+06	Grey	0.454133
585	CO2 Electrolysis PV Coupled	Formic Acid	Pipeline	Fertilizer	17	10	0	50000	0.2	0.06	1.6	3.2	1023152324	546895591	17.08	0.177	0.506	173000	6999.5	14.4594	6.65455	92.5379	25425031	273.9	164384	41254420	1.20325e+06	65914.2	481519	-8.93185e+06	40104.5	-1.50718e+07	900.493					FALSE	3.27649e+06	3.77205e+06	3.27649e+06	3.77205e+06	Green	0
586	CO2 Electrolysis PV Coupled	Formic Acid	Pipeline	FCEV filling	18	10	0	50000	0.2	0.06	1.6	3.21	1737938630	-907474735	>25 years	0	0.527	516000	7518.03	14.8444	6.98271	93.6797	84181017	273.9	50000	15000000	437500	23966.2	188049	-3.2476e+06	14581.9	-5.46711e+06	273.9	300	5000	7.70988e-19	50000	TRUE	1.1885e+06	1.37151e+06	-1	-1	Green	0.0332526
587	CO2 Electrolysis PV Coupled	Formic Acid	Railcar	Fertilizer	19	10	0	50000	0.2	0.06	1.6	3.14	973974713	659496111	16	0.1903	0.508	137000	6983.9	14.6064	6.62209	92.4673	25563104	273.9	164384	41678765	1.21563e+06	66592.2	485388	-9.02372e+06	40517	-1.52279e+07	900.493					FALSE	3.31042e+06	3.81085e+06	3.31042e+06	3.81085e+06	Green	0
588	CO2 Electrolysis PV Coupled	Formic Acid	Railcar	FCEV filling	20	10	0	50000	0.2	0.06	1.6	2.4	976723655	3037106649	16.58	0.1456	0.544	297000	7355.12	16.3799	6.6437	92.942	168381726	273.9	50000	15000000	437500	23966.2	183974	-3.2476e+06	14581.9	-5.47119e+06	273.9	300	5000	7.70988e-19	50000	TRUE	1.18939e+06	1.37151e+06	1.18939e+06	1.37151e+06	Green	0.0325321
589	CO2 Electrolysis PV Coupled	Methanol	Pipeline	Fertilizer	21	10	0	50000	0.2	0.06	1.6	4.27	1427231547	-519734144	>25 years	0	0.353	148000	3015.23	0.026458	0.022571	0.07848	22431890	273.9	164382	36602428	1.06757e+06	58481.5	184037	-8.16785e+06	35582.1	-1.36155e+07	900.487					FALSE	2.95988e+06	3.3467e+06	-1	-1	Green	0
590	CO2 Electrolysis PV Coupled	Methanol	Pipeline	FCEV filling	22	10	0	50000	0.2	0.06	1.6	4.91	2030243492	-1816651516	>25 years	0	0.332	224000	3351.86	0.276356	0.235755	0.819711	22015265	273.9	50000	15000000	437500	23966.2	83840.4	-3.3518e+06	14581.9	-5.57132e+06	273.9	300	5000	7.70988e-19	50000	TRUE	1.21116e+06	1.37151e+06	-1	-1	Green	0.0148254
591	CO2 Electrolysis PV Coupled	Methanol	Railcar	Fertilizer	23	10	0	50000	0.2	0.06	1.6	4.19	1377871699	-409576368	>25 years	0.0053	0.361	148000	3018.95	0.187993	0.002288	0.050325	22721118	273.9	164383	37216644	1.08549e+06	59462.9	187357	-8.30371e+06	36179.2	-1.38437e+07	900.489					FALSE	3.0095e+06	3.40286e+06	-1	-1	Green	0
592	CO2 Electrolysis PV Coupled	Methanol	Railcar	FCEV filling	24	10	0	50000	0.2	0.06	1.6	2.84	1385946628	639469062	24.83	0	0.52	454000	3390.78	1.96356	0.023893	0.525644	141709692	273.9	50000	15000000	437500	23966.2	84813.9	-3.34676e+06	14581.9	-5.57035e+06	273.9	300	5000	7.70988e-19	50000	TRUE	1.21094e+06	1.37151e+06	1.21094e+06	1.37151e+06	Green	0.0149976
593	N2 Electrolysis PV Coupled	Ammonia	Pipeline	Fertilizer	25	10	0	50000	0.2	0.06	1.6	2.01	667426743	1603826035	8.5	0.3622	0.667	118000	29.2259	0.021691	0.018492	0.064338	28129604	249.5	164384	44208582	1.28942e+06	64341.9	2154.52	-1.00853e+07	42976.3	-1.6665e+07	820.274					FALSE	3.62282e+06	4.04216e+06	3.62282e+06	4.04216e+06	Green	0
594	N2 Electrolysis PV Coupled	Ammonia	Pipeline	FCEV filling	26	10	0	50000	0.2	0.06	1.6	2.79	1568162626	-139252913	>25 years	0	0.556	478000	305.261	0.226565	0.193148	0.672009	115403308	249.5	50000	15000000	437500	21831.2	7635.53	-3.42801e+06	14581.9	-5.64752e+06	249.5	300	5000	7.70988e-19	50000	TRUE	1.22772e+06	1.37151e+06	-1	-1	Green	0.00135018
595	N2 Electrolysis PV Coupled	Ammonia	Railcar	Fertilizer	27	10	0	50000	0.2	0.06	1.6	1.91	618821433	1742161490	7.67	0.3787	0.681	111000	8.94212	0.042679	0.000528	0.011422	28426477	249.5	164384	44555633	1.29954e+06	64847	664.384	-1.01648e+07	43313.6	-1.67973e+07	820.274					FALSE	3.65158e+06	4.07389e+06	3.65158e+06	4.07389e+06	Green	0
596	N2 Electrolysis PV Coupled	Ammonia	Railcar	FCEV filling	28	10	0	50000	0.2	0.06	1.6	1.91	927572580	3859577136	14.58	0.2217	0.607	268000	93.3996	0.445778	0.005514	0.119297	182320397	249.5	50000	15000000	437500	21831.2	2336.21	-3.42923e+06	14581.9	-5.65282e+06	249.5	300	5000	7.70988e-19	50000	TRUE	1.22887e+06	1.37151e+06	1.22887e+06	1.37151e+06	Green	0.000413111
597	H2O electrolysis PV Coupled	Gas H2	Pipeline	Fertilizer	29	10	0	50000	0.2	0.06	1.6	2.45	739801192	1320671680	10.33	0.3017	0.601	126000	17574.2	14.401	3.09453	58.2408	27156228	249.5	164384	43591718	1.27143e+06	63444.1	1.27748e+06	-9.43789e+06	42376.6	-1.51571e+07	820.274					FALSE	3.29501e+06	3.98576e+06	3.29501e+06	3.98576e+06	Green	0
598	H2O electrolysis PV Coupled	Gas H2	Pipeline	FCEV filling	30	10	0	50000	0.2	0.06	1.6	2.49	1339169660	1089559372	23.08	0.0692	0.573	414000	18392	15.0081	3.61215	60.0415	148250180	249.5	50000	15000000	437500	21831.2	460039	-3.2476e+06	14581.9	-5.19512e+06	249.5	300	5000	7.70988e-19	50000	TRUE	1.12937e+06	1.37151e+06	1.12937e+06	1.37151e+06	Green	0.0813485
599	H2O electrolysis PV Coupled	Gas H2	Railcar	Fertilizer	31	10	0	50000	0.2	0.06	1.6	2.77	705023641	1232603704	10.5	0.2726	0.565	122000	18415.5	13.6706	11.6568	40.5477	25560034	249.5	164384	43624438	1.27238e+06	63491.7	1.33965e+06	-9.44497e+06	42408.4	-1.51072e+07	820.274					FALSE	3.28418e+06	3.98875e+06	3.28418e+06	3.98875e+06	Green	0
600	H2O electrolysis PV Coupled	Gas H2	Railcar	FCEV filling	32	10	0	50000	0.2	0.06	1.6	5.77	776291776	-653347789	>25 years	0	0.18	491000	18417.4	13.6797	11.657	40.55	24269293	249.5	50000	15000000	437500	21831.2	460676	-3.2476e+06	14581.9	-5.19448e+06	249.5	300	5000	7.70988e-19	50000	TRUE	1.12924e+06	1.37151e+06	-1	-1	Green	0.0814611
601	H2O electrolysis PV Coupled	Formic Acid	Pipeline	Fertilizer	33	10	0	50000	0.2	0.06	1.6	3.86	922142151	353051899	18.5	0.1264	0.411	140000	146211	14.4594	6.65455	92.5379	21443146	249.5	164384	40846980	1.19137e+06	59449.4	9.95902e+06	638623	39708.4	-5.44072e+06	820.274					FALSE	1.18277e+06	3.7348e+06	1.18277e+06	3.7348e+06	Grey	0
602	H2O electrolysis PV Coupled	Formic Acid	Pipeline	FCEV filling	34	10	0	50000	0.2	0.06	1.6	4.34	1636897493	-1284112470	>25 years	0	0.0401	390000	146730	14.8444	6.98271	93.6797	36706597	249.5	50000	15000000	437500	21831.2	3.67016e+06	234518	14581.9	-1.985e+06	249.5	300	5000	7.70988e-19	50000	TRUE	431521	1.37151e+06	-1	-1	Grey	0.648992
603	H2O electrolysis PV Coupled	Formic Acid	Railcar	Fertilizer	35	10	0	50000	0.2	0.06	1.6	3.8	872964541	464738382	17.17	0.1398	0.421	139000	146196	14.6064	6.62209	92.4673	21581221	249.5	164384	41358563	1.20629e+06	60193.9	1.00827e+07	646621	40205.7	-5.50994e+06	820.274					FALSE	1.19781e+06	3.78157e+06	1.19781e+06	3.78157e+06	Grey	0
604	H2O electrolysis PV Coupled	Formic Acid	Railcar	FCEV filling	36	10	0	50000	0.2	0.06	1.6	3.18	875682518	2291156703	17.58	0.0951	0.454	317000	146567	16.3799	6.6437	92.942	140171914	249.5	50000	15000000	437500	21831.2	3.66609e+06	234518	14581.9	-1.98907e+06	249.5	300	5000	7.70988e-19	50000	TRUE	432407	1.37151e+06	432407	1.37151e+06	Grey	0.648272
605	H2O electrolysis PV Coupled	Liquid H2	Truck	Fertilizer	37	10	0	50000	0.2	0.06	1.6	4.14	1104125258	-47049886	24.58	0.0647	0.374	144000	82028.8	61.1648	51.6827	180.284	20967842	249.5	164383	38883384	1.1341e+06	56591.5	5.31871e+06	-8.41851e+06	37799.5	-9.34074e+06	820.273					FALSE	2.0306e+06	3.55526e+06	-1	-1	Grey	0
606	H2O electrolysis PV Coupled	Liquid H2	Truck	FCEV filling	38	10	0	50000	0.2	0.06	1.6	3.12	1110833924	1309352272	21.91	0.0393	0.481	398000	86395.7	67.4171	51.8604	185.918	138010647	249.5	50000	15000000	437500	21831.2	2.16102e+06	-3.2476e+06	14581.9	-3.49414e+06	249.5	300	5000	7.70988e-19	50000	TRUE	759595	1.37151e+06	759595	1.37151e+06	Grey	0.382132
607	H2O electrolysis PV Coupled	Liquid H2	Railcar	Fertilizer	39	10	0	50000	0.2	0.06	1.6	4.11	1102761633	-32648584	24.25	0.0687	0.382	141000	81570.4	60.5219	51.6641	179.692	21074608	249.5	164383	38943445	1.13585e+06	56678.9	5.29716e+06	-8.43151e+06	37857.9	-9.38494e+06	820.273					FALSE	2.0402e+06	3.56075e+06	-1	-1	Grey	0
608	H2O electrolysis PV Coupled	Liquid H2	Railcar	FCEV filling	40	10	0	50000	0.2	0.06	1.6	3.07	1109524843	1365968816	21.67	0.0468	0.489	392000	81607.8	60.7013	51.6662	179.74	139204905	249.5	50000	15000000	437500	21831.2	2.04126e+06	-3.2476e+06	14581.9	-3.6139e+06	249.5	300	5000	7.70988e-19	50000	TRUE	785630	1.37151e+06	785630	1.37151e+06	Grey	0.360955
609	SMR	Gas H2	Pipeline	Fertilizer	41	10	6.5	50000	0.2	0.06	1.6	1.81	176292286	2.26427e+09	3.33	0.477	0.712	71000	147410	68.5876	3.09453	177.237	25698144	0	164384	45970977	1.34082e+06	0	1.13002e+07		44689.5	-6.03132e+06	0					FALSE	1.31116e+06	4.2033e+06	1.31116e+06	4.2033e+06	Grey	0
610	SMR	Gas H2	Pipeline	FCEV filling	42	10	6.5	50000	0.2	0.06	1.6	2.56	775644559	2.75243e+09	16.25	0.2462	0.577	297000	148228	69.1946	3.61215	179.038	147557326	0	50000	15000000	437500	0	3.70764e+06		14581.9	-1.94752e+06	0	300	5000	7.70988e-19	50000	TRUE	423374	1.37151e+06	423374	1.37151e+06	Grey	0.655619
611	SMR	Gas H2	Railcar	Fertilizer	43	10	6.5	50000	0.2	0.06	1.6	2.13	141514735	2.17449e+09	2.42	0.448	0.652	65000	148251	67.8572	11.6568	159.544	24101950	0	164384	46094312	1.34442e+06	0	1.13952e+07		44809.4	-5.98284e+06	0					FALSE	1.30062e+06	4.21458e+06	1.30062e+06	4.21458e+06	Grey	0
612	SMR	Gas H2	Railcar	FCEV filling	44	10	6.5	50000	0.2	0.06	1.6	5.79	212766675	8.54439e+08	15.08	0.0344	0.143	259000	148253	67.8662	11.657	159.547	43406202	0	50000	15000000	437500	0	3.70827e+06		14581.9	-1.94689e+06	0	300	5000	7.70988e-19	50000	TRUE	423236	1.37151e+06	423236	1.37151e+06	Grey	0.655731
613	SMR	Formic Acid	Pipeline	Fertilizer	45	10	6.5	50000	0.2	0.06	1.6	2.3	357190563	1.74294e+09	5.92	0.402	0.645	109000	136835	68.646	0.034745	211.535	24728138	0	164384	44706991	1.30395e+06	0	1.02012e+07	-788350	43460.8	-6.65384e+06	0					FALSE	1.44649e+06	4.08773e+06	1.44649e+06	4.08773e+06	Grey	0
614	SMR	Formic Acid	Pipeline	FCEV filling	46	10	6.5	50000	0.2	0.06	1.6	3	1071945905	8.8515e+08	23.33	0.1213	0.527	415000	137354	69.031	0.362905	212.676	121764604	0	50000	15000000	437500	0	3.43565e+06	-271992	14581.9	-2.21951e+06	0	300	5000	7.70988e-19	50000	TRUE	482503	1.37151e+06	482503	1.37151e+06	Grey	0.607523
615	SMR	Formic Acid	Railcar	Fertilizer	47	10	6.5	50000	0.2	0.06	1.6	2.23	308012953	1.86732e+09	5.08	0.4154	0.652	102000	136820	68.793	0.002288	211.464	24866208	0	164384	45089007	1.3151e+06	0	1.02872e+07	-859516	43832.2	-6.71187e+06	0					FALSE	1.4591e+06	4.12266e+06	1.4591e+06	4.12266e+06	Grey	0
616	SMR	Formic Acid	Railcar	FCEV filling	48	10	6.5	50000	0.2	0.06	1.6	2.27	310730930	5.12418e+09	6	0.3706	0.595	519000	137191	70.5665	0.023893	211.939	157279637	0	50000	15000000	437500	0	3.43157e+06	-276702	14581.9	-2.22359e+06	0	300	5000	7.70988e-19	50000	TRUE	483389	1.37151e+06	483389	1.37151e+06	Grey	0.606802
617	SMR	Liquid H2	Truck	Fertilizer	49	10	6.5	50000	0.2	0.06	1.6	3.6	540616353	8.19973e+08	11.67	0.2408	0.464	129000	211865	115.351	51.6827	299.28	19509817	0	164384	42083413	1.22743e+06	0	1.48678e+07	4.52315e+06	40910.3	-998132	0					FALSE	216985	3.84785e+06	216985	3.84785e+06	Grey	0
618	SMR	Liquid H2	Truck	FCEV filling	50	10	6.5	50000	0.2	0.06	1.6	3.22	547325018	2.98311e+09	13.58	0.2154	0.478	250000	216232	121.604	51.8604	304.915	131607346	0	50000	15000000	437500	0	5.40862e+06	1.70098e+06	14581.9	-246539	0	300	5000	7.70988e-19	50000	TRUE	53595.5	1.37151e+06	53595.5	1.37151e+06	Grey	0.956403
619	SMR	Liquid H2	Railcar	Fertilizer	51	10	6.5	50000	0.2	0.06	1.6	3.56	539252727	8.35308e+08	11.58	0.2449	0.468	131000	211406	114.709	51.6641	298.689	19616581	0	164384	42128533	1.22875e+06	0	1.48515e+07	4.43669e+06	40954.2	-1.03141e+06	0					FALSE	224218	3.85198e+06	224218	3.85198e+06	Grey	0
620	SMR	Liquid H2	Railcar	FCEV filling	52	10	6.5	50000	0.2	0.06	1.6	3.17	546015937	3.04308e+09	13.42	0.2229	0.482	232000	211444	114.888	51.6662	298.737	132518063	0	50000	15000000	437500	0	5.28886e+06	1.58059e+06	14581.9	-366300	0	300	5000	7.70988e-19	50000	TRUE	79630.3	1.37151e+06	79630.3	1.37151e+06	Grey	0.935225
621	CO Purchase	Methyl Formate	Pipeline	Fertilizer	53	10	0.3	50000	0.2	0.06	1.6	6.21	258656887	-18108231	22.33	0.016	0.101	131000	486138	21.0254	13.1026	97.7719	4953058	0	164383	37749296	1.10102e+06	0	3.06016e+07	2.1988e+07	36697	1.63697e+07	0					FALSE	0	0	-1	-1	Grey	0
622	CO Purchase	Methyl Formate	Pipeline	FCEV filling	54	10	0.3	50000	0.2	0.06	1.6	9.15	860842891	-1094078507	>25 years	0	0	N/A	486554	21.3346	13.3662	98.6889	-1809306	0	50000	15000000	437500	0	1.21702e+07	8.73458e+06	14581.9	6.51506e+06	0	300	5000	7.70988e-19	50000	TRUE	0	0	-1	-1	Grey	0
623	CO Purchase	Methyl Formate	Railcar	Fertilizer	55	10	0.3	50000	0.2	0.06	1.6	6.14	209425422	98930503	16.42	0.0312	0.11	125000	486133	21.1807	13.077	97.7251	5172468	0	164383	40476533	1.18057e+06	0	3.28121e+07	2.35773e+07	39348.2	1.7552e+07	0					FALSE	0	0	0	0	Grey	0
624	CO Purchase	Methyl Formate	Railcar	FCEV filling	56	10	0.3	50000	0.2	0.06	1.6	6.16	217263458	216117691	21.58	0	0.101	313000	486505	22.9563	13.0987	98.2002	26917225	0	50000	15000000	437500	0	1.2169e+07	8.73741e+06	14581.9	6.51382e+06	0	300	5000	7.70988e-19	50000	TRUE	0	0	0	0	Grey	0
625	CO Purchase	Formic Acid	Pipeline	Fertilizer	57	10	0.3	50000	0.2	0.06	1.6	4.94	255103081	610374349	8.92	0.149	0.277	115000	390830	21.0335	13.1094	97.7956	11232970	0	164384	43591283	1.27141e+06	0	2.84095e+07	1.84629e+07	42376.2	1.19751e+07	0					FALSE	0	0	0	0	Grey	0
626	CO Purchase	Formic Acid	Pipeline	FCEV filling	58	10	0.3	50000	0.2	0.06	1.6	8.3	969851800	-970151015	>25 years	0	0	N/A	391348	21.4184	13.4375	98.9374	-281473	0	50000	15000000	437500	0	9.78883e+06	6.35318e+06	14581.9	4.13367e+06	0	300	5000	7.70988e-19	50000	TRUE	0	0	-1	-1	Grey	0
627	CO Purchase	Formic Acid	Railcar	Fertilizer	59	10	0.3	50000	0.2	0.06	1.6	4.87	205925471	733763303	6.92	0.1625	0.286	108000	390814	21.1805	13.0769	97.725	11371041	0	164384	44490359	1.29764e+06	0	2.89943e+07	1.88437e+07	43250.2	1.22209e+07	0					FALSE	0	0	0	0	Grey	0
628	CO Purchase	Formic Acid	Railcar	FCEV filling	60	10	0.3	50000	0.2	0.06	1.6	5.03	208636825	1896049751	9.17	0.1177	0.227	182000	391185	22.9539	13.0985	98.1997	66717189	0	50000	15000000	437500	0	9.78476e+06	6.35318e+06	14581.9	4.1296e+06	0	300	5000	7.70988e-19	50000	TRUE	0	0	0	0	Grey	0
629	CO Purchase	Methanol	Pipeline	Fertilizer	61	10	0.3	50000	0.2	0.06	1.6	6	659960757	-444074935	>25 years	0	0.129	150000	386846	2.7198	3.83784	0.07848	8233175	0	164346	31123310	907763	0	2.0077e+07	1.29754e+07	30255.7	8.34321e+06	0					FALSE	0	0	-1	-1	Grey	0
630	CO Purchase	Methanol	Pipeline	FCEV filling	62	10	0.3	50000	0.2	0.06	1.6	9.7	1262941738	-1462831741	>25 years	0	0	N/A	387182	2.9697	4.05102	0.819711	-1542721	0		#DIV/0!	#DIV/0!	#DIV/0!	#DIV/0!	#DIV/0!	#DIV/0!	#DIV/0!	0	#DIV/0!	#NUM!	#NUM!	0	TRUE	#DIV/0!	#DIV/0!	-1	-1	Grey	#DIV/0!
631	CO Purchase	Methanol	Railcar	Fertilizer	63	10	0.3	50000	0.2	0.06	1.6	5.94	610600910	-345292649	>25 years	0	0.139	148000	386849	2.88134	3.81755	0.050325	8525775	0	164373	33170818	967482	0	2.1398e+07	1.383e+07	32246.2	8.89229e+06	0					FALSE	0	0	-1	-1	Grey	0
632	CO Purchase	Methanol	Railcar	FCEV filling	64	10	0.3	50000	0.2	0.06	1.6	5.53	618644874	-327272688	>25 years	0	0.205	513000	387221	4.65691	3.83916	0.525644	31771451	0	50000	15000000	437500	0	9.6856e+06	6.25403e+06	14581.9	4.03044e+06	0	300	5000	7.70988e-19	50000	TRUE	0	0	-1	-1	Grey	0
633	Biomass Gasification	Gas H2	Pipeline	Fertilizer	1	10	100	50000	0.2	0.12	1.6	3.44	333516884	483178100	7.08	0.2887	0.486	115000	622705	20.975	9.54937	63.4985	19050677	0	164384	44316705	1.29257e+06	0	4.60178e+07	3.51242e+07	43081.4	2.93099e+07	0					FALSE	0	0	0	0	Grey	0
634	Biomass Gasification	Gas H2	Pipeline	FCEV filling	2	10	100	50000	0.2	0.12	1.6	3.99	933482049	-635795279	>25 years	0.0575	0.402	443000	623523	21.5821	10.067	65.2992	80284883	0	50000	15000000	437500	0	1.55962e+07	1.18886e+07	14581.9	9.94107e+06	0	300	5000	7.70988e-19	50000	TRUE	0	0	-1	-1	Grey	0
635	Biomass Gasification	Gas H2	Railcar	Fertilizer	3	10	100	50000	0.2	0.12	1.6	3.77	299352225	460444172	7	0.2593	0.435	106000	623546	20.2447	18.1117	45.8055	17449929	0	164384	44429165	1.29585e+06	0	4.61969e+07	3.52133e+07	43190.7	2.94466e+07	0					FALSE	0	0	0	0	Grey	0
636	Biomass Gasification	Gas H2	Railcar	FCEV filling	4	10	100	50000	0.2	0.12	1.6	8.53	370604165	-496229098	>25 years	0	0	N/A	N/A	N/A	N/A	N/A	-1225804	0	50000	15000000	437500	0	#VALUE!	#VALUE!	14581.9	#VALUE!	0	300	5000	7.70988e-19	50000	TRUE	#VALUE!	#VALUE!	-1	-1	#VALUE!	#VALUE!
637	Biomass Gasification	Formic Acid	Pipeline	Fertilizer	5	10	100	50000	0.2	0.12	1.6	4.03	558248992	-19899176	13.58	0.1935	0.403	131000	612130	21.0335	13.1094	97.7956	17757654	0	164384	41617687	1.21385e+06	0	4.24813e+07	3.2985e+07	40457.6	2.6791e+07	0					FALSE	0	0	-1	-1	Grey	0
638	Biomass Gasification	Formic Acid	Pipeline	FCEV filling	6	10	100	50000	0.2	0.12	1.6	5.1	1273028826	-1218161818	>25 years	0	0.29	257000	612649	21.4184	13.4375	98.9374	18136138	0	50000	15000000	437500	0	1.53242e+07	1.18886e+07	14581.9	9.66908e+06	0	300	5000	7.70988e-19	50000	TRUE	0	0	-1	-1	Grey	0
639	Biomass Gasification	Formic Acid	Railcar	Fertilizer	7	10	100	50000	0.2	0.12	1.6	3.98	509071382	75692020	12.25	0.2069	0.412	131000	612114	21.1805	13.0769	97.725	17895726	0	164384	42212744	1.23121e+06	0	4.30876e+07	3.34567e+07	41036.1	2.71729e+07	0					FALSE	0	0	0	0	Grey	0
640	Biomass Gasification	Formic Acid	Railcar	FCEV filling	8	10	100	50000	0.2	0.12	1.6	3.81	511813851	509339634	14.92	0.1621	0.393	285000	612486	22.9539	13.0985	98.1997	112479619	0	50000	15000000	437500	0	1.53202e+07	1.18886e+07	14581.9	9.665e+06	0	300	5000	7.70988e-19	50000	TRUE	0	0	0	0	Grey	0
641	Biomass Gasification	Liquid H2	Truck	Fertilizer	9	10	100	50000	0.2	0.12	1.6	5.14	698453842	-478166279	>25 years	0.0521	0.241	146000	687159	67.7389	58.1375	185.542	12857646	0	164383	36997524	1.07909e+06	0	4.23942e+07	2.93232e+07	35966.2	2.84457e+07	0					FALSE	0	0	-1	-1	Grey	0
642	Biomass Gasification	Liquid H2	Truck	FCEV filling	10	10	100	50000	0.2	0.12	1.6	4.63	705162508	-415469144	>25 years	0.0267	0.306	425000	691526	73.9912	58.3152	191.176	73386646	0	50000	15000000	437500	0	1.72972e+07	1.18886e+07	14581.9	1.1642e+07	0	300	5000	7.70988e-19	50000	TRUE	0	0	-1	-1	Grey	0
643	Biomass Gasification	Liquid H2	Railcar	Fertilizer	11	10	100	50000	0.2	0.12	1.6	5.1	697090217	-471357815	>25 years	0.0562	0.252	140000	686701	67.0959	58.119	184.95	12964420	0	164383	37112821	1.08246e+06	0	4.24979e+07	2.94146e+07	36078.3	2.8506e+07	0					FALSE	0	0	-1	-1	Grey	0
644	Biomass Gasification	Liquid H2	Railcar	FCEV filling	12	10	100	50000	0.2	0.12	1.6	4.58	703853427	-398995032	24.58	0.0342	0.312	418000	686738	67.2754	58.1211	184.998	74854132	0	50000	15000000	437500	0	1.71775e+07	1.18886e+07	14581.9	1.15223e+07	0	300	5000	7.70988e-19	50000	TRUE	0	0	-1	-1	Grey	0
645	CO2 Electrolysis PV Coupled	Methyl Formate	Pipeline	Fertilizer	13	10	0	50000	0.2	0.12	1.6	2.94	503711984	412346324	8.92	0.3088	0.553	122000	102307	14.4514	6.64772	92.5141	23031655	68.5	164384	43722011	1.27523e+06	17470.6	7.45905e+06	-2.51737e+06	42503.3	-9.02462e+06	225.205					FALSE	1.96187e+06	3.99767e+06	1.96187e+06	3.99767e+06	Grey	0
646	CO2 Electrolysis PV Coupled	Methyl Formate	Pipeline	FCEV filling	14	10	0	50000	0.2	0.12	1.6	3.28	1105928952	-646663074	24.67	0.0739	0.487	423000	102724	14.7605	6.91136	93.4312	111561584	68.5	50000	15000000	437500	5993.75	2.56944e+06	-866203	14581.9	-3.08572e+06	68.5	300	5000	7.70988e-19	50000	TRUE	670808	1.37151e+06	-1	-1	Grey	0.454353
647	CO2 Electrolysis PV Coupled	Methyl Formate	Railcar	Fertilizer	15	10	0	50000	0.2	0.12	1.6	2.86	454480518	525309322	7.92	0.324	0.562	116000	102303	14.6067	6.62211	92.4673	23251037	68.5	164384	44157111	1.28792e+06	17644.4	7.53292e+06	-2.54163e+06	42926.2	-9.11478e+06	225.205					FALSE	1.98147e+06	4.03746e+06	1.98147e+06	4.03746e+06	Grey	0
648	CO2 Electrolysis PV Coupled	Methyl Formate	Railcar	FCEV filling	16	10	0	50000	0.2	0.12	1.6	2.57	462349519	1559172692	9.25	0.2918	0.527	174000	102674	16.3822	6.64386	92.9425	153338719	68.5	50000	15000000	437500	5993.75	2.5682e+06	-863369	14581.9	-3.08696e+06	68.5	300	5000	7.70988e-19	50000	TRUE	671078	1.37151e+06	671078	1.37151e+06	Grey	0.454133
649	CO2 Electrolysis PV Coupled	Formic Acid	Pipeline	Fertilizer	17	10	0	50000	0.2	0.12	1.6	3.2	1023152324	-285737922	17.08	0.177	0.508	136000	6999.5	14.4594	6.65455	92.5379	25425031	273.9	164384	41254420	1.20325e+06	65914.2	481519	-8.93185e+06	40104.5	-1.50718e+07	900.493					FALSE	3.27649e+06	3.77205e+06	-1	-1	Green	0
650	CO2 Electrolysis PV Coupled	Formic Acid	Pipeline	FCEV filling	18	10	0	50000	0.2	0.12	1.6	3.21	1737938630	-1531402366	>25 years	0	0.527	516000	7518.03	14.8444	6.98271	93.6797	84181017	273.9	50000	15000000	437500	23966.2	188049	-3.2476e+06	14581.9	-5.46711e+06	273.9	300	5000	7.70988e-19	50000	TRUE	1.1885e+06	1.37151e+06	-1	-1	Green	0.0332526
651	CO2 Electrolysis PV Coupled	Formic Acid	Railcar	Fertilizer	19	10	0	50000	0.2	0.12	1.6	3.14	973974713	-190796463	16	0.1903	0.518	135000	6983.9	14.6064	6.62209	92.4673	25563104	273.9	164384	41678765	1.21563e+06	66592.2	485388	-9.02372e+06	40517	-1.52279e+07	900.493					FALSE	3.31042e+06	3.81085e+06	-1	-1	Green	0
652	CO2 Electrolysis PV Coupled	Formic Acid	Railcar	FCEV filling	20	10	0	50000	0.2	0.12	1.6	2.4	976723655	472862304	16.58	0.1456	0.544	197000	7355.12	16.3799	6.6437	92.942	168381726	273.9	50000	15000000	437500	23966.2	183974	-3.2476e+06	14581.9	-5.47119e+06	273.9	300	5000	7.70988e-19	50000	TRUE	1.18939e+06	1.37151e+06	1.18939e+06	1.37151e+06	Green	0.0325321
653	CO2 Electrolysis PV Coupled	Methanol	Pipeline	Fertilizer	21	10	0	50000	0.2	0.12	1.6	4.27	1427231547	-1075352711	>25 years	0	0.353	148000	3015.23	0.026458	0.022571	0.07848	22431890	273.9	164382	36602428	1.06757e+06	58481.5	184037	-8.16785e+06	35582.1	-1.36155e+07	900.487					FALSE	2.95988e+06	3.3467e+06	-1	-1	Green	0
654	CO2 Electrolysis PV Coupled	Methanol	Pipeline	FCEV filling	22	10	0	50000	0.2	0.12	1.6	4.91	2030243492	-1989691090	>25 years	0	0.332	224000	3351.86	0.276356	0.235755	0.819711	22015265	273.9	50000	15000000	437500	23966.2	83840.4	-3.3518e+06	14581.9	-5.57132e+06	273.9	300	5000	7.70988e-19	50000	TRUE	1.21116e+06	1.37151e+06	-1	-1	Green	0.0148254
655	CO2 Electrolysis PV Coupled	Methanol	Railcar	Fertilizer	23	10	0	50000	0.2	0.12	1.6	4.19	1377871699	-991615020	>25 years	0.0053	0.368	147000	3018.95	0.187993	0.002288	0.050325	22721118	273.9	164383	37216644	1.08549e+06	59462.9	187357	-8.30371e+06	36179.2	-1.38437e+07	900.489					FALSE	3.0095e+06	3.40286e+06	-1	-1	Green	0
656	CO2 Electrolysis PV Coupled	Methanol	Railcar	FCEV filling	24	10	0	50000	0.2	0.12	1.6	2.84	1385946628	-793602336	24.83	0	0.52	454000	3390.78	1.96356	0.023893	0.525644	141709692	273.9	50000	15000000	437500	23966.2	84813.9	-3.34676e+06	14581.9	-5.57035e+06	273.9	300	5000	7.70988e-19	50000	TRUE	1.21094e+06	1.37151e+06	-1	-1	Green	0.0149976
657	N2 Electrolysis PV Coupled	Ammonia	Pipeline	Fertilizer	25	10	0	50000	0.2	0.12	1.6	2.01	667426743	531813304	8.5	0.3622	0.668	115000	29.2259	0.021691	0.018492	0.064338	28129604	249.5	164384	44208582	1.28942e+06	64341.9	2154.52	-1.00853e+07	42976.3	-1.6665e+07	820.274					FALSE	3.62282e+06	4.04216e+06	3.62282e+06	4.04216e+06	Green	0
658	N2 Electrolysis PV Coupled	Ammonia	Pipeline	FCEV filling	26	10	0	50000	0.2	0.12	1.6	2.79	1568162626	-1189954610	>25 years	0	0.558	470000	305.261	0.226565	0.193148	0.672009	115403308	249.5	50000	15000000	437500	21831.2	7635.53	-3.42801e+06	14581.9	-5.64752e+06	249.5	300	5000	7.70988e-19	50000	TRUE	1.22772e+06	1.37151e+06	-1	-1	Green	0.00135018
659	N2 Electrolysis PV Coupled	Ammonia	Railcar	Fertilizer	27	10	0	50000	0.2	0.12	1.6	1.91	618821433	650963296	7.67	0.3787	0.681	111000	8.94212	0.042679	0.000528	0.011422	28426477	249.5	164384	44555633	1.29954e+06	64847	664.384	-1.01648e+07	43313.6	-1.67973e+07	820.274					FALSE	3.65158e+06	4.07389e+06	3.65158e+06	4.07389e+06	Green	0
660	N2 Electrolysis PV Coupled	Ammonia	Railcar	FCEV filling	28	10	0	50000	0.2	0.12	1.6	1.91	927572580	860537624	14.58	0.2217	0.613	264000	93.3996	0.445778	0.005514	0.119297	25508369	249.5	50000	15000000	437500	21831.2	2336.21	-3.42923e+06	14581.9	-5.65282e+06	249.5	300	5000	7.70988e-19	50000	TRUE	1.22887e+06	1.37151e+06	1.22887e+06	1.37151e+06	Green	0.000413111
661	H2O electrolysis PV Coupled	Gas H2	Pipeline	Fertilizer	29	10	0	50000	0.2	0.12	1.6	2.45	739801192	328702637	10.33	0.3017	0.6	129000	17574.2	14.401	3.09453	58.2408	27156228	249.5	164384	43591718	1.27143e+06	63444.1	1.27748e+06	-9.43789e+06	42376.6	-1.51571e+07	820.274					FALSE	3.29501e+06	3.98576e+06	3.29501e+06	3.98576e+06	Green	0
662	H2O electrolysis PV Coupled	Gas H2	Pipeline	FCEV filling	30	10	0	50000	0.2	0.12	1.6	2.49	1339169660	-624432285	23.08	0.0692	0.573	414000	18392	15.0081	3.61215	60.0415	148250180	249.5	50000	15000000	437500	21831.2	460039	-3.2476e+06	14581.9	-5.19512e+06	249.5	300	5000	7.70988e-19	50000	TRUE	1.12937e+06	1.37151e+06	-1	-1	Green	0.0813485
663	H2O electrolysis PV Coupled	Gas H2	Railcar	Fertilizer	31	10	0	50000	0.2	0.12	1.6	2.77	705023641	305526779	10.58	0.2756	0.564	122000	18415.5	13.6706	11.6568	40.5477	25560034	249.5	164384	43624438	1.27238e+06	63491.7	1.33965e+06	-9.44497e+06	42408.4	-1.51072e+07	820.274					FALSE	3.28418e+06	3.98875e+06	3.28418e+06	3.98875e+06	Green	0
664	H2O electrolysis PV Coupled	Gas H2	Railcar	FCEV filling	32	10	0	50000	0.2	0.12	1.6	5.77	776291776	-751263111	>25 years	0	0.18	491000	18417.4	13.6797	11.657	40.55	24269293	249.5	50000	15000000	437500	21831.2	460676	-3.2476e+06	14581.9	-5.19448e+06	249.5	300	5000	7.70988e-19	50000	TRUE	1.12924e+06	1.37151e+06	-1	-1	Green	0.0814611
665	H2O electrolysis PV Coupled	Formic Acid	Pipeline	Fertilizer	33	10	0	50000	0.2	0.12	1.6	3.86	922142151	-332566250	18.5	0.1264	0.419	138000	146211	14.4594	6.65455	92.5379	21443146	249.5	164384	40846980	1.19137e+06	59449.4	9.95902e+06	638623	39708.4	-5.44072e+06	820.274					FALSE	1.18277e+06	3.7348e+06	-1	-1	Grey	0
666	H2O electrolysis PV Coupled	Formic Acid	Pipeline	FCEV filling	34	10	0	50000	0.2	0.12	1.6	4.34	1636897493	-1556843209	>25 years	0	0.401	390000	146730	14.8444	6.98271	93.6797	36706597	249.5	50000	15000000	437500	21831.2	3.67016e+06	234518	14581.9	-1.985e+06	249.5	300	5000	7.70988e-19	50000	TRUE	431521	1.37151e+06	-1	-1	Grey	0.648992
667	H2O electrolysis PV Coupled	Formic Acid	Railcar	Fertilizer	35	10	0	50000	0.2	0.12	1.6	3.8	872964541	-239063180	17.17	0.1398	0.421	138000	146196	14.6064	6.62209	92.4673	21581221	249.5	164384	41358563	1.20629e+06	60193.9	1.00827e+07	646621	40205.7	-5.50994e+06	820.274					FALSE	1.19781e+06	3.78157e+06	-1	-1	Grey	0
668	H2O electrolysis PV Coupled	Formic Acid	Railcar	FCEV filling	36	10	0	50000	0.2	0.12	1.6	3.18	875682518	242485448	17.58	0.0951	0.454	317000	146567	16.3799	6.6437	92.942	140171914	249.5	50000	15000000	437500	21831.2	3.66609e+06	234518	14581.9	-1.98907e+06	249.5	300	5000	7.70988e-19	50000	TRUE	432407	1.37151e+06	432407	1.37151e+06	Grey	0.648272
669	H2O electrolysis PV Coupled	Liquid H2	Truck	Fertilizer	37	10	0	50000	0.2	0.12	1.6	4.14	1104125258	-656217903	24.58	0.0647	0.374	144000	82028.8	61.1648	51.6827	180.284	20967842	249.5	164383	38883384	1.1341e+06	56591.5	5.31871e+06	-8.41851e+06	37799.5	-9.34074e+06	820.273					FALSE	2.0306e+06	3.55526e+06	-1	-1	Grey	0
670	H2O electrolysis PV Coupled	Liquid H2	Truck	FCEV filling	38	10	0	50000	0.2	0.12	1.6	3.12	1110833924	-352323198	21.92	0.0393	0.475	392000	86395.7	67.4171	51.8604	185.918	138010647	249.5	50000	15000000	437500	21831.2	2.16102e+06	-3.2476e+06	14581.9	-3.49414e+06	249.5	300	5000	7.70988e-19	50000	TRUE	759595	1.37151e+06	-1	-1	Grey	0.382132
671	H2O electrolysis PV Coupled	Liquid H2	Railcar	Fertilizer	39	10	0	50000	0.2	0.12	1.6	4.11	1102761633	-648710748	24.25	0.0687	0.382	141000	81570.4	60.5219	51.6641	179.692	21074608	249.5	164383	38943445	1.13585e+06	56678.9	5.29716e+06	-8.43151e+06	37857.9	-9.38494e+06	820.273					FALSE	2.0402e+06	3.56075e+06	-1	-1	Grey	0
672	H2O electrolysis PV Coupled	Liquid H2	Railcar	FCEV filling	40	10	0	50000	0.2	0.12	1.6	3.07	1109524843	-332105297	21.67	0.0468	0.483	404000	81607.8	60.7013	51.6662	179.74	139204905	249.5	50000	15000000	437500	21831.2	2.04126e+06	-3.2476e+06	14581.9	-3.6139e+06	249.5	300	5000	7.70988e-19	50000	TRUE	785630	1.37151e+06	-1	-1	Grey	0.360955
673	SMR	Gas H2	Pipeline	Fertilizer	41	10	6.5	50000	0.2	0.12	1.6	1.81	176292286	1.22293e+09	3.33	0.477	0.712	71000	147410	68.5876	3.09453	177.237	25698144	0	164384	45991535	1.34142e+06	0	1.13053e+07		44709.5	-6.03402e+06	0					FALSE	1.31174e+06	4.20518e+06	1.31174e+06	4.20518e+06	Grey	0
674	SMR	Gas H2	Pipeline	FCEV filling	42	10	6.5	50000	0.2	0.12	1.6	2.56	775644559	3.93675e+08	16.25	0.2462	0.577	297000	148228	69.1946	3.61215	179.038	147557326	0	50000	15000000	437500	0	3.70764e+06		14581.9	-1.94752e+06	0	300	5000	7.70988e-19	50000	TRUE	423374	1.37151e+06	423374	1.37151e+06	Grey	0.655619
675	SMR	Gas H2	Railcar	Fertilizer	43	10	6.5	50000	0.2	0.12	1.6	2.13	141514735	1.20248e+09	2.42	0.448	0.652	65000	148251	67.8572	11.6568	159.544	24101950	0	164384	46105786	1.34475e+06	0	1.1398e+07		44820.6	-5.98433e+06	0					FALSE	1.30094e+06	4.21563e+06	1.30094e+06	4.21563e+06	Grey	0
676	SMR	Gas H2	Railcar	FCEV filling	44	10	6.5	50000	0.2	0.12	1.6	5.79	212766675	1.79953e+08	15.08	0.0344	0.143	259000	148253	67.8662	11.657	159.547	43406202	0	50000	15000000	437500	0	3.70827e+06		14581.9	-1.94689e+06	0	300	5000	7.70988e-19	50000	TRUE	423236	1.37151e+06	423236	1.37151e+06	Grey	0.655731
677	SMR	Formic Acid	Pipeline	Fertilizer	45	10	6.5	50000	0.2	0.12	1.6	2.3	357190563	7.71377e+08	5.92	0.402	0.645	109000	136835	68.646	0.034745	211.535	24728138	0	164384	44790327	1.30638e+06	0	1.02202e+07	-789820	43541.8	-6.66624e+06	0					FALSE	1.44918e+06	4.09535e+06	1.44918e+06	4.09535e+06	Grey	0
678	SMR	Formic Acid	Pipeline	FCEV filling	46	10	6.5	50000	0.2	0.12	1.6	3	1071945905	-5.18035e+08	23.33	0.1213	0.527	415000	137354	69.031	0.362905	212.676	121764604	0	50000	15000000	437500	0	3.43565e+06	-271992	14581.9	-2.21951e+06	0	300	5000	7.70988e-19	50000	TRUE	482503	1.37151e+06	-1	-1	Grey	0.607523
679	SMR	Formic Acid	Railcar	Fertilizer	47	10	6.5	50000	0.2	0.12	1.6	2.23	308012953	8.85902e+08	5.08	0.4154	0.652	102000	136820	68.793	0.002288	211.464	24866208	0	164384	45155282	1.31703e+06	0	1.03023e+07	-860779	43896.6	-6.72174e+06	0					FALSE	1.46125e+06	4.12872e+06	1.46125e+06	4.12872e+06	Grey	0
680	SMR	Formic Acid	Railcar	FCEV filling	48	10	6.5	50000	0.2	0.12	1.6	2.27	310730930	2.06857e+09	6	0.3706	0.595	519000	137191	70.5665	0.023893	211.939	157279637	0	50000	15000000	437500	0	3.43157e+06	-276702	14581.9	-2.22359e+06	0	300	5000	7.70988e-19	50000	TRUE	483389	1.37151e+06	483389	1.37151e+06	Grey	0.606802
681	SMR	Liquid H2	Truck	Fertilizer	49	10	6.5	50000	0.2	0.12	1.6	3.6	540616353	1.07127e+08	11.67	0.2408	0.464	129000	211865	115.351	51.6827	299.28	19509817	0	164384	42317776	1.23427e+06	0	1.49506e+07	4.54834e+06	41138.2	-1.00369e+06	0					FALSE	218194	3.86928e+06	218194	3.86928e+06	Grey	0
682	SMR	Liquid H2	Truck	FCEV filling	50	10	6.5	50000	0.2	0.12	1.6	3.22	547325018	7.54798e+08	13.58	0.2154	0.478	250000	216232	121.604	51.8604	304.915	131607346	0	50000	15000000	437500	0	5.40862e+06	1.70098e+06	14581.9	-246539	0	300	5000	7.70988e-19	50000	TRUE	53595.5	1.37151e+06	53595.5	1.37151e+06	Grey	0.956403
683	SMR	Liquid H2	Railcar	Fertilizer	51	10	6.5	50000	0.2	0.12	1.6	3.56	539252727	1.15566e+08	11.58	0.2449	0.468	131000	211406	114.709	51.6641	298.689	19616581	0	164384	42359404	1.23548e+06	0	1.49329e+07	4.46101e+06	41178.6	-1.03706e+06	0					FALSE	225447	3.87308e+06	225447	3.87308e+06	Grey	0
684	SMR	Liquid H2	Railcar	FCEV filling	52	10	6.5	50000	0.2	0.12	1.6	3.17	546015937	7.78247e+08	13.42	0.2229	0.482	232000	211444	114.888	51.6662	298.737	132518063	0	50000	15000000	437500	0	5.28886e+06	1.58059e+06	14581.9	-366300	0	300	5000	7.70988e-19	50000	TRUE	79630.3	1.37151e+06	79630.3	1.37151e+06	Grey	0.935225
685	CO Purchase	Methyl Formate	Pipeline	Fertilizer	53	10	0.3	50000	0.2	0.12	1.6	6.21	258656887	-165515915	22.33	0.016	0.1	131000	486138	21.0254	13.1026	97.7719	4953058	0	164383	37749296	1.10102e+06	0	3.06016e+07	2.1988e+07	36697	1.63697e+07	0					FALSE	0	0	-1	-1	Grey	0
686	CO Purchase	Methyl Formate	Pipeline	FCEV filling	54	10	0.3	50000	0.2	0.12	1.6	9.15	860842891	-1031363211	>25	0	0	N/A	486554	21.3346	13.3662	98.6889	-1809306	0	50000	15000000	437500	0	1.21702e+07	8.73458e+06	14581.9	6.51506e+06	0	300	5000	7.70988e-19	50000	TRUE	0	0	-1	-1	Grey	0
687	CO Purchase	Methyl Formate	Railcar	Fertilizer	55	10	0.3	50000	0.2	0.12	1.6	6.14	209425422	-73641579	16.4	0.0312	0.111	128000	486133	21.1807	13.077	97.7251	5172468	0	164383	40476533	1.18057e+06	0	3.28121e+07	2.35773e+07	39348.2	1.7552e+07	0					FALSE	0	0	-1	-1	Grey	0
688	CO Purchase	Methyl Formate	Railcar	FCEV filling	56	10	0.3	50000	0.2	0.12	1.6	6.16	217263458	-87781165	21.6	0	0.101	313000	486505	22.9563	13.0987	98.2002	26937074	0	50000	15000000	437500	0	1.2169e+07	8.73741e+06	14581.9	6.51382e+06	0	300	5000	7.70988e-19	50000	TRUE	0	0	-1	-1	Grey	0
689	CO Purchase	Formic Acid	Pipeline	Fertilizer	57	10	0.3	50000	0.2	0.12	1.6	4.94	255103081	182103895	8.92	0.149	0.274	123000	390830	21.0335	13.1094	97.7956	11232970	0	164384	43591283	1.27141e+06	0	2.84095e+07	1.84629e+07	42376.2	1.19751e+07	0					FALSE	0	0	0	0	Grey	0
690	CO Purchase	Formic Acid	Pipeline	FCEV filling	58	10	0.3	50000	0.2	0.12	1.6	8.3	969851800	-995596054	>25	0	0	N/A	391348	21.4184	13.4375	98.9374	-281473	0	50000	15000000	437500	0	9.78883e+06	6.35318e+06	14581.9	4.13367e+06	0	300	5000	7.70988e-19	50000	TRUE	0	0	-1	-1	Grey	0
691	CO Purchase	Formic Acid	Railcar	Fertilizer	59	10	0.3	50000	0.2	0.12	1.6	4.87	205925471	292196970	6.92	0.1625	0.287	112000	390814	21.1805	13.0769	97.725	11371041	0	164384	44490359	1.29764e+06	0	2.89943e+07	1.88437e+07	43250.2	1.22209e+07	0					FALSE	0	0	0	0	Grey	0
692	CO Purchase	Formic Acid	Railcar	FCEV filling	60	10	0.3	50000	0.2	0.12	1.6	5.03	208636825	659582450	9.08	0.1177	0.23	175000	391185	22.9539	13.0985	98.1997	66720219	0	50000	15000000	437500	0	9.78476e+06	6.35318e+06	14581.9	4.1296e+06	0	300	5000	7.70988e-19	50000	TRUE	0	0	0	0	Grey	0
693	CO Purchase	Methanol	Pipeline	Fertilizer	61	10	0.3	50000	0.2	0.12	1.6	6	659960757	-596064982	>25	0	0.129	149000	386846	2.7198	3.83784	0.07848	8233193	0	164346	31123310	907763	0	2.0077e+07	1.29754e+07	30255.7	8.34321e+06	0					FALSE	0	0	-1	-1	Grey	0
694	CO Purchase	Methanol	Pipeline	FCEV filling	62	10	0.3	50000	0.2	0.12	1.6	9.7	1262941738	-1413313436	>25	0	0	N/A	387182	2.9697	4.05102	0.819711	-1542721	0		#DIV/0!	#DIV/0!	#DIV/0!	#DIV/0!	#DIV/0!	#DIV/0!	#DIV/0!	0	#DIV/0!	#NUM!	#NUM!	0	TRUE	#DIV/0!	#DIV/0!	-1	-1	Grey	#DIV/0!
695	CO Purchase	Methanol	Railcar	Fertilizer	63	10	0.3	50000	0.2	0.12	1.6	5.94	610600910	-524040957	>25	0	0.139	148000	386849	2.88134	3.81755	0.050325	8525781	0	164373	33170818	967482	0	2.1398e+07	1.383e+07	32246.2	8.89229e+06	0					FALSE	0	0	-1	-1	Grey	0
696	CO Purchase	Methanol	Railcar	FCEV filling	64	10	0.3	50000	0.2	0.12	1.6	5.53	618644874	-547118255	>25	0	0.205	513000	387221	4.65691	3.83916	0.525644	31791958	0	50000	15000000	437500	0	9.6856e+06	6.25403e+06	14581.9	4.03044e+06	0	300	5000	7.70988e-19	50000	TRUE	0	0	-1	-1	Grey	0
697	Biomass Gasification	Gas H2	Pipeline	Fertilizer	1	10	100	50000	0.2	0.08	5	3.49	334194831	884722804	7.17	0.284	0.476	117000	622705	20.975	9.54937	63.4985	18832244	0	164384	44282790	1.29158e+06	0	4.59826e+07	3.50973e+07	43048.4	2.92875e+07	0					FALSE	0	0	0	0	Grey	0
698	Biomass Gasification	Gas H2	Pipeline	FCEV filling	2	10	100	50000	0.2	0.08	5	4.03	933547104	-253812124	>25	0.053	0.398	454000	623523	21.5821	10.067	65.2992	77832755	0	50000	15000000	437500	0	1.55962e+07	1.18886e+07	14581.9	9.94107e+06	0	300	5000	7.70988e-19	50000	TRUE	0	0	-1	-1	Grey	0
699	Biomass Gasification	Gas H2	Railcar	Fertilizer	3	10	100	50000	0.2	0.08	5	3.82	299417279	825833496	7.08	0.2548	0.433	115000	623546	20.2447	18.1117	45.8055	17236051	0	164384	44393876	1.29482e+06	0	4.61602e+07	3.51854e+07	43156.4	2.94232e+07	0					FALSE	0	0	0	0	Grey	0
700	Biomass Gasification	Gas H2	Railcar	FCEV filling	4	10	100	50000	0.2	0.08	5	8.57	370669219	-548804142	>25	0	0	N/A	623548	20.2537	18.1118	45.8077	-1290859	0		#DIV/0!	#DIV/0!	#DIV/0!	#DIV/0!	#DIV/0!	#DIV/0!	#DIV/0!	0	#DIV/0!	#NUM!	#NUM!	0	TRUE	#DIV/0!	#DIV/0!	-1	-1	Grey	#DIV/0!
701	Biomass Gasification	Formic Acid	Pipeline	Fertilizer	5	10	100	50000	0.2	0.08	5	4.12	558379094	293011946	14	0.1845	0.392	134000	612130	21.0335	13.1094	97.7956	17329920	0	164384	41469322	1.20952e+06	0	4.23299e+07	3.28674e+07	40313.4	2.66955e+07	0					FALSE	0	0	0	0	Grey	0
702	Biomass Gasification	Formic Acid	Pipeline	FCEV filling	6	10	100	50000	0.2	0.08	5	5.3	1273158928	-1143281728	>25	0	0.26	221000	612649	21.4184	13.4375	98.9374	14965654	0	50000	15000000	437500	0	1.53242e+07	1.18886e+07	14581.9	9.66908e+06	0	300	5000	7.70988e-19	50000	TRUE	0	0	-1	-1	Grey	0
703	Biomass Gasification	Formic Acid	Railcar	Fertilizer	7	10	100	50000	0.2	0.08	5	4.06	509201484	398791172	12.58	0.1978	0.4	132000	612114	21.1805	13.0769	97.725	17467993	0	164384	42081690	1.22738e+06	0	4.29538e+07	3.33528e+07	40908.7	2.70886e+07	0					FALSE	0	0	0	0	Grey	0
704	Biomass Gasification	Formic Acid	Railcar	FCEV filling	8	10	100	50000	0.2	0.08	5	3.9	511943953	1381454494	15.33	0.1531	0.388	274000	612486	22.9539	13.0985	98.1997	109476358	0	50000	15000000	437500	0	1.53202e+07	1.18886e+07	14581.9	9.665e+06	0	300	5000	7.70988e-19	50000	TRUE	0	0	0	0	Grey	0
705	Biomass Gasification	Liquid H2	Truck	Fertilizer	9	10	100	50000	0.2	0.08	5	5.18	698518897	-297292208	>25	0.0476	0.243	142000	687159	67.7389	58.1375	185.542	12643749	0	164383	36804224	1.07346e+06	0	4.21727e+07	2.917e+07	35778.3	2.82971e+07	0					FALSE	0	0	-1	-1	Grey	0
706	Biomass Gasification	Liquid H2	Truck	FCEV filling	10	10	100	50000	0.2	0.08	5	4.67	705227563	-71666065	>25	0.0222	0.302	448000	691526	73.9912	58.3152	191.176	71174764	0	50000	15000000	437500	0	1.72972e+07	1.18886e+07	14581.9	1.1642e+07	0	300	5000	7.70988e-19	50000	TRUE	0	0	-1	-1	Grey	0
707	Biomass Gasification	Liquid H2	Railcar	Fertilizer	11	10	100	50000	0.2	0.08	5	5.14	697155271	-286652652	>25	0.0517	0.248	144000	686701	67.0959	58.119	184.95	12750525	0	164383	36923671	1.07694e+06	0	4.22813e+07	2.92647e+07	35894.4	2.83607e+07	0					FALSE	0	0	-1	-1	Grey	0
708	Biomass Gasification	Liquid H2	Railcar	FCEV filling	12	10	100	50000	0.2	0.08	5	4.63	703918481	-37832186	24.92	0.0297	0.309	441000	686738	67.2754	58.1211	184.998	72661909	0	50000	15000000	437500	0	1.71775e+07	1.18886e+07	14581.9	1.15223e+07	0	300	5000	7.70988e-19	50000	TRUE	0	0	-1	-1	Grey	0
709	CO2 Electrolysis PV Coupled	Methyl Formate	Pipeline	Fertilizer	13	10	0	50000	0.2	0.08	5	2.99	503777039	882841180	9	0.3043	0.546	121000	102307	14.4514	6.64772	92.5141	22817777	68.5	164384	43687703	1.27422e+06	17456.9	7.45319e+06	-2.5154e+06	42469.9	-9.01754e+06	225.205					FALSE	1.96033e+06	3.99454e+06	1.96033e+06	3.99454e+06	Grey	0
710	CO2 Electrolysis PV Coupled	Methyl Formate	Pipeline	FCEV filling	14	10	0	50000	0.2	0.08	5	3.32	1105994006	-38056190	24.83	0.0694	0.484	438000	102724	14.7605	6.91136	93.4312	109354197	68.5	50000	15000000	437500	5993.75	2.56944e+06	-866203	14581.9	-3.08572e+06	68.5	300	5000	7.70988e-19	50000	TRUE	670808	1.37151e+06	-1	-1	Grey	0.454353
711	CO2 Electrolysis PV Coupled	Methyl Formate	Railcar	Fertilizer	15	10	0	50000	0.2	0.08	5	2.9	454545573	1006645243	8	0.3194	0.557	118000	102303	14.6067	6.62211	92.4673	23037159	68.5	164384	44128073	1.28707e+06	17632.8	7.52797e+06	-2.53996e+06	42898	-9.10879e+06	225.205					FALSE	1.98017e+06	4.0348e+06	1.98017e+06	4.0348e+06	Grey	0
712	CO2 Electrolysis PV Coupled	Methyl Formate	Railcar	FCEV filling	16	10	0	50000	0.2	0.08	5	2.61	462414574	3054964864	9.25	0.2873	0.533	169000	102674	16.3822	6.64386	92.9425	151922920	68.5	50000	15000000	437500	5993.75	2.5682e+06	-863369	14581.9	-3.08696e+06	68.5	300	5000	7.70988e-19	50000	TRUE	671078	1.37151e+06	671078	1.37151e+06	Grey	0.454133
713	CO2 Electrolysis PV Coupled	Formic Acid	Pipeline	Fertilizer	17	10	0	50000	0.2	0.08	5	3.24	1023217378	166243297	17.25	0.1724	0.498	138000	6999.5	14.4594	6.65455	92.5379	25211152	273.9	164384	41199708	1.20166e+06	65826.8	480881	-8.92e+06	40051.3	-1.50518e+07	900.493					FALSE	3.27214e+06	3.76705e+06	3.27214e+06	3.76705e+06	Green	0
714	CO2 Electrolysis PV Coupled	Formic Acid	Pipeline	FCEV filling	18	10	0	50000	0.2	0.08	5	3.26	1738003685	-1242925460	>25	0	0.521	508000	7518.03	14.8444	6.98271	93.6797	81085361	273.9	50000	15000000	437500	23966.2	188049	-3.2476e+06	14581.9	-5.46711e+06	273.9	300	5000	7.70988e-19	50000	TRUE	1.1885e+06	1.37151e+06	-1	-1	Green	0.0332526
715	CO2 Electrolysis PV Coupled	Formic Acid	Railcar	Fertilizer	19	10	0	50000	0.2	0.08	5	3.18	974039768	272582713	16.17	0.1858	0.51	134000	6983.9	14.6064	6.62209	92.4673	25349226	273.9	164384	41628156	1.21415e+06	66511.4	484799	-9.01276e+06	40467.8	-1.52095e+07	900.493					FALSE	3.3064e+06	3.80622e+06	3.3064e+06	3.80622e+06	Green	0
716	CO2 Electrolysis PV Coupled	Formic Acid	Railcar	FCEV filling	20	10	0	50000	0.2	0.08	5	2.45	976788710	1799158551	16.75	0.1411	0.548	288000	7355.12	16.3799	6.6437	92.942	166863715	273.9	50000	15000000	437500	23966.2	183974	-3.2476e+06	14581.9	-5.47119e+06	273.9	300	5000	7.70988e-19	50000	TRUE	1.18939e+06	1.37151e+06	1.18939e+06	1.37151e+06	Green	0.0325321
717	CO2 Electrolysis PV Coupled	Methanol	Pipeline	Fertilizer	21	10	0	50000	0.2	0.08	5	4.31	1427296602	-786384845	>25	0	0.357	147000	3015.23	0.026458	0.022571	0.07848	22217986	273.9	164382	36486874	1.0642e+06	58296.9	183456	-8.14206e+06	35469.8	-1.35725e+07	900.487					FALSE	2.95054e+06	3.33614e+06	-1	-1	Green	0
718	CO2 Electrolysis PV Coupled	Methanol	Pipeline	FCEV filling	22	10	0	50000	0.2	0.08	5	5.04	2030308547	-1912735319	>25	0	0.315	213000	3351.86	0.276356	0.235755	0.819711	20450445	273.9	50000	15000000	437500	23966.2	83840.4	-3.3518e+06	14581.9	-5.57132e+06	273.9	300	5000	7.70988e-19	50000	TRUE	1.21116e+06	1.37151e+06	-1	-1	Green	0.0148254
719	CO2 Electrolysis PV Coupled	Methanol	Railcar	Fertilizer	23	10	0	50000	0.2	0.08	5	4.23	1377936754	-686917212	>25	0.0008	0.364	147000	3018.95	0.187993	0.002288	0.050325	22507224	273.9	164383	37109858	1.08237e+06	59292.3	186819	-8.27988e+06	36075.4	-1.3804e+07	900.489					FALSE	3.00087e+06	3.3931e+06	-1	-1	Green	0
720	CO2 Electrolysis PV Coupled	Methanol	Railcar	FCEV filling	24	10	0	50000	0.2	0.08	5	2.88	1386011683	-93346514	>25	0	0.516	445000	3390.78	1.96356	0.023893	0.525644	139619245	273.9	50000	15000000	437500	23966.2	84813.9	-3.34676e+06	14581.9	-5.57035e+06	273.9	300	5000	7.70988e-19	50000	TRUE	1.21094e+06	1.37151e+06	-1	-1	Green	0.0149976
721	N2 Electrolysis PV Coupled	Ammonia	Pipeline	Fertilizer	25	10	0	50000	0.2	0.08	5	2.06	667491798	1124801221	8.58	0.3577	0.665	117000	29.2259	0.021691	0.018492	0.064338	27915726	249.5	164384	44185707	1.28875e+06	64308.6	2153.4	-1.00801e+07	42954	-1.66563e+07	820.274					FALSE	3.62094e+06	4.04007e+06	3.62094e+06	4.04007e+06	Green	0
722	N2 Electrolysis PV Coupled	Ammonia	Pipeline	FCEV filling	26	10	0	50000	0.2	0.08	5	2.84	1568227681	-690142120	>25	0	0.553	472000	305.261	0.226565	0.193148	0.672009	112855866	249.5	50000	15000000	437500	21831.2	7635.53	-3.42801e+06	14581.9	-5.64752e+06	249.5	300	5000	7.70988e-19	50000	TRUE	1.22772e+06	1.37151e+06	-1	-1	Green	0.00135018
723	N2 Electrolysis PV Coupled	Ammonia	Railcar	Fertilizer	27	10	0	50000	0.2	0.08	5	1.95	618886488	1256278252	7.75	0.3742	0.674	117000	8.94212	0.042679	0.000528	0.011422	28212599	249.5	164384	44536538	1.29898e+06	64819.2	664.1	-1.01605e+07	43295.1	-1.67901e+07	820.274					FALSE	3.65002e+06	4.07215e+06	3.65002e+06	4.07215e+06	Green	0
724	N2 Electrolysis PV Coupled	Ammonia	Railcar	FCEV filling	28	10	0	50000	0.2	0.08	5	1.95	927637634	2426880194	14.67	0.2172	0.612	261000	93.3996	0.445778	0.005514	0.119297	180846323	249.5	50000	15000000	437500	21831.2	2336.21	-3.42923e+06	14581.9	-5.65282e+06	249.5	300	5000	7.70988e-19	50000	TRUE	1.22887e+06	1.37151e+06	1.22887e+06	1.37151e+06	Green	0.000413111
725	H2O electrolysis PV Coupled	Gas H2	Pipeline	Fertilizer	29	10	0	50000	0.2	0.08	5	2.49	739866247	876467103	10.42	0.2972	0.604	123000	17574.2	14.401	3.09453	58.2408	26942350	249.5	164384	43562068	1.27056e+06	63401	1.27661e+06	-9.43147e+06	42347.8	-1.51467e+07	820.274					FALSE	3.29277e+06	3.98305e+06	3.29277e+06	3.98305e+06	Green	0
726	H2O electrolysis PV Coupled	Gas H2	Pipeline	FCEV filling	30	10	0	50000	0.2	0.08	5	2.53	1339234715	219295305	23.25	0.0647	0.565	418000	18392	15.0081	3.61215	60.0415	146257643	249.5	50000	15000000	437500	21831.2	460039	-3.2476e+06	14581.9	-5.19512e+06	249.5	300	5000	7.70988e-19	50000	TRUE	1.12937e+06	1.37151e+06	1.12937e+06	1.37151e+06	Green	0.0813485
727	H2O electrolysis PV Coupled	Gas H2	Railcar	Fertilizer	31	10	0	50000	0.2	0.08	5	2.81	705088695	817201935	10.58	0.2681	0.561	124000	18415.5	13.6706	11.6568	40.5477	25346156	249.5	164384	43592642	1.27145e+06	63445.5	1.33867e+06	-9.43809e+06	42377.5	-1.50962e+07	820.274					FALSE	3.28179e+06	3.98584e+06	3.28179e+06	3.98584e+06	Green	0
728	H2O electrolysis PV Coupled	Gas H2	Railcar	FCEV filling	32	10	0	50000	0.2	0.08	5	5.87	776356831	-725925612	>25	0	0.173	463000	18417.4	13.6797	11.657	40.55	19657410	249.5	50000	15000000	437500	21831.2	460676	-3.2476e+06	14581.9	-5.19448e+06	249.5	300	5000	7.70988e-19	50000	TRUE	1.12924e+06	1.37151e+06	-1	-1	Green	0.0814611
729	H2O electrolysis PV Coupled	Formic Acid	Pipeline	Fertilizer	33	10	0	50000	0.2	0.08	5	3.91	922207205	36019134	18.75	0.1219	0.412	138000	146211	14.4594	6.65455	92.5379	21229267	249.5	164384	40776705	1.18932e+06	59347.1	9.94189e+06	637524	39640.1	-5.43136e+06	820.274					FALSE	1.18073e+06	3.72837e+06	1.18073e+06	3.72837e+06	Grey	0
730	H2O electrolysis PV Coupled	Formic Acid	Pipeline	FCEV filling	34	10	0	50000	0.2	0.08	5	4.43	1636962547	-1435032330	>25	0	0.389	368000	146730	14.8444	6.98271	93.6797	34113996	249.5	50000	15000000	437500	21831.2	3.67016e+06	234518	14581.9	-1.985e+06	249.5	300	5000	7.70988e-19	50000	TRUE	431521	1.37151e+06	-1	-1	Grey	0.648992
731	H2O electrolysis PV Coupled	Formic Acid	Railcar	Fertilizer	35	10	0	50000	0.2	0.08	5	3.85	873029595	141166633	17.33	0.1353	0.419	135000	146196	14.6064	6.62209	92.4673	21367342	249.5	164384	41294411	1.20442e+06	60100.6	1.0067e+07	645618	40143.3	-5.5014e+06	820.274					FALSE	1.19596e+06	3.77571e+06	1.19596e+06	3.77571e+06	Grey	0
732	H2O electrolysis PV Coupled	Formic Acid	Railcar	FCEV filling	36	10	0	50000	0.2	0.08	5	3.23	875747572	1288563764	17.75	0.0906	0.453	312000	146567	16.3799	6.6437	92.942	138611238	249.5	50000	15000000	437500	21831.2	3.66609e+06	234518	14581.9	-1.98907e+06	249.5	300	5000	7.70988e-19	50000	TRUE	432407	1.37151e+06	432407	1.37151e+06	Grey	0.648272
733	H2O electrolysis PV Coupled	Liquid H2	Truck	Fertilizer	37	10	0	50000	0.2	0.08	5	4.19	1104190313	-334525853	24.92	0.0602	0.374	142000	82028.8	61.1648	51.6827	180.284	20753960	249.5	164383	38787808	1.13131e+06	56452.4	5.30564e+06	-8.39781e+06	37706.6	-9.31778e+06	820.273					FALSE	2.0256e+06	3.54652e+06	-1	-1	Grey	0
734	H2O electrolysis PV Coupled	Liquid H2	Truck	FCEV filling	38	10	0	50000	0.2	0.08	5	3.16	1110898979	471902630	22.08	0.0348	0.477	396000	86395.7	67.4171	51.8604	185.918	136165553	249.5	50000	15000000	437500	21831.2	2.16102e+06	-3.2476e+06	14581.9	-3.49414e+06	249.5	300	5000	7.70988e-19	50000	TRUE	759595	1.37151e+06	759595	1.37151e+06	Grey	0.382132
735	H2O electrolysis PV Coupled	Liquid H2	Railcar	Fertilizer	39	10	0	50000	0.2	0.08	5	4.15	1102826687	-323205643	24.58	0.0642	0.378	142000	81570.4	60.5219	51.6641	179.692	20860726	249.5	164383	38849204	1.1331e+06	56541.8	5.28434e+06	-8.41111e+06	37766.3	-9.36223e+06	820.273					FALSE	2.03527e+06	3.55213e+06	-1	-1	Grey	0
736	H2O electrolysis PV Coupled	Liquid H2	Railcar	FCEV filling	40	10	0	50000	0.2	0.08	5	3.12	1109589897	511176355	21.92	0.0423	0.482	396000	81607.8	60.7013	51.6662	179.74	137367815	249.5	50000	15000000	437500	21831.2	2.04126e+06	-3.2476e+06	14581.9	-3.6139e+06	249.5	300	5000	7.70988e-19	50000	TRUE	785630	1.37151e+06	785630	1.37151e+06	Grey	0.360955
737	SMR	Gas H2	Pipeline	Fertilizer	41	10	6.5	50000	0.2	0.08	5	1.82	176314407	1812207797	2.83	0.4754	0.7	71000	147410	68.5876	3.09453	177.237	25625417	0	164384	45989738	1.34137e+06	0	1.13048e+07		44707.8	-6.03379e+06	0					FALSE	1.31169e+06	4.20502e+06	1.31169e+06	4.20502e+06	Grey	0
738	SMR	Gas H2	Pipeline	FCEV filling	42	10	6.5	50000	0.2	0.08	5	2.57	775666680	1619458359	16.33	0.2446	0.575	285000	148228	69.1946	3.61215	179.038	147016183	0	50000	15000000	437500	0	3.70764e+06		14581.9	-1.94752e+06	0	300	5000	7.70988e-19	50000	TRUE	423374	1.37151e+06	423374	1.37151e+06	Grey	0.655619
739	SMR	Gas H2	Railcar	Fertilizer	43	10	6.5	50000	0.2	0.08	5	2.14	141536856	1753120670	2.42	0.4464	0.651	65000	148251	67.8572	11.6568	159.544	23158455	0	164384	46104830	1.34472e+06	0	1.13978e+07		44819.7	-5.9842e+06	0					FALSE	1.30091e+06	4.21554e+06	1.30091e+06	4.21554e+06	Grey	0
740	SMR	Gas H2	Railcar	FCEV filling	44	10	6.5	50000	0.2	0.08	5	5.8	212788796	525816755	15.25	0.0329	0.144	272000	148253	67.8662	11.657	159.547	42889825	0	50000	15000000	437500	0	3.70827e+06		14581.9	-1.94689e+06	0	300	5000	7.70988e-19	50000	TRUE	423236	1.37151e+06	423236	1.37151e+06	Grey	0.655731
741	SMR	Formic Acid	Pipeline	Fertilizer	45	10	6.5	50000	0.2	0.08	5	2.31	357212684	1318259922	6	0.4004	0.643	109000	136835	68.646	0.034745	211.535	24655411	0	164384	44783150	1.30618e+06	0	1.02185e+07	-789693	43534.8	-6.66518e+06	0					FALSE	1.44895e+06	4.0947e+06	1.44895e+06	4.0947e+06	Grey	0
742	SMR	Formic Acid	Pipeline	FCEV filling	46	10	6.5	50000	0.2	0.08	5	3.01	1071968026	187155294	23.42	0.1197	0.525	514000	137354	69.031	0.362905	212.676	121049354	0	50000	15000000	437500	0	3.43565e+06	-271992	14581.9	-2.21951e+06	0	300	5000	7.70988e-19	50000	TRUE	482503	1.37151e+06	482503	1.37151e+06	Grey	0.607523
743	SMR	Formic Acid	Railcar	Fertilizer	47	10	6.5	50000	0.2	0.08	5	2.25	308035074	1439831656	5.08	0.4139	0.65	101000	136820	68.793	0.002288	211.464	24793481	0	164384	45149798	1.31687e+06	0	1.0301e+07	-860674	43891.2	-6.72092e+06	0					FALSE	1.46107e+06	4.12822e+06	1.46107e+06	4.12822e+06	Grey	0
744	SMR	Formic Acid	Railcar	FCEV filling	48	10	6.5	50000	0.2	0.08	5	2.29	310753051	3729744982	6	0.3691	0.594	118000	137191	70.5665	0.023893	211.939	156799999	0	50000	15000000	437500	0	3.43157e+06	-276702	14581.9	-2.22359e+06	0	300	5000	7.70988e-19	50000	TRUE	483389	1.37151e+06	483389	1.37151e+06	Grey	0.606802
745	SMR	Liquid H2	Truck	Fertilizer	49	10	6.5	50000	0.2	0.08	5	3.62	540638474	500951931	11.75	0.2393	0.46	131000	211865	115.351	51.6827	299.28	19437090	0	164384	42298066	1.23369e+06	0	1.49436e+07	4.54622e+06	41119	-1.00322e+06	0					FALSE	218092	3.86748e+06	218092	3.86748e+06	Grey	0
746	SMR	Liquid H2	Truck	FCEV filling	50	10	6.5	50000	0.2	0.08	5	3.24	547347139	1933802945	13.67	0.2139	0.47	259000	216232	121.604	51.8604	304.915	131106616	0	50000	15000000	437500	0	5.40862e+06	1.70098e+06	14581.9	-246539	0	300	5000	7.70988e-19	50000	TRUE	53595.5	1.37151e+06	53595.5	1.37151e+06	Grey	0.956403
747	SMR	Liquid H2	Railcar	Fertilizer	51	10	6.5	50000	0.2	0.08	5	3.58	539274848	513189727	11.58	0.2433	0.468	130000	211406	114.709	51.6641	298.689	19543854	0	164384	42340366	1.23493e+06	0	1.49262e+07	4.459e+06	41160.1	-1.03659e+06	0					FALSE	225346	3.87134e+06	225346	3.87134e+06	Grey	0
748	SMR	Liquid H2	Railcar	FCEV filling	52	10	6.5	50000	0.2	0.08	5	3.19	546038058	1976693982	13.42	0.2214	0.483	253000	211444	114.888	51.6662	298.737	132017982	0	50000	15000000	437500	0	5.28886e+06	1.58059e+06	14581.9	-366300	0	300	5000	7.70988e-19	50000	TRUE	79630.3	1.37151e+06	79630.3	1.37151e+06	Grey	0.935225
749	CO Purchase	Methyl Formate	Pipeline	Fertilizer	53	10	0.3	50000	0.2	0.08	5	6.26	258721942	-101205471	23.67	0.0115	0.098	140000	486138	21.0254	13.1026	97.7719	4739167	0	164383	37194756	1.08485e+06	0	3.01521e+07	2.1665e+07	36158	1.61292e+07	0					FALSE	0	0	-1	-1	Grey	0
750	CO Purchase	Methyl Formate	Pipeline	FCEV filling	54	10	0.3	50000	0.2	0.08	5	9.2	860907945	-1079012807	>25	0	0	N/A	486554	21.3346	13.3662	98.6889	-1874360	0		#DIV/0!	#DIV/0!	#DIV/0!	#DIV/0!	#DIV/0!	#DIV/0!	#DIV/0!	0	#DIV/0!	#NUM!	#NUM!	0	TRUE	#DIV/0!	#DIV/0!	-1	-1	Grey	#DIV/0!
751	CO Purchase	Methyl Formate	Railcar	Fertilizer	55	10	0.3	50000	0.2	0.08	5	6.19	209490476	5054515	17.08	0.0266	0.107	134000	486133	21.1807	13.077	97.7251	4958589	0	164383	40112355	1.16994e+06	0	3.25169e+07	2.33652e+07	38994.2	1.73941e+07	0					FALSE	0	0	0	0	Grey	0
752	CO Purchase	Methyl Formate	Railcar	FCEV filling	56	10	0.3	50000	0.2	0.08	5	6.21	217328513	21872129	22.67	0	0.098	381000	486505	22.9563	13.0987	98.2002	24704418	0	50000	15000000	437500	0	1.2169e+07	8.73741e+06	14581.9	6.51382e+06	0	300	5000	7.70988e-19	50000	TRUE	0	0	0	0	Grey	0
753	CO Purchase	Formic Acid	Pipeline	Fertilizer	57	10	0.3	50000	0.2	0.08	5	4.98	255168135	406253394	9.08	0.1445	0.273	121000	390830	21.0335	13.1094	97.7956	11019092	0	164384	43515060	1.26919e+06	0	2.83598e+07	1.84306e+07	42302.1	1.19542e+07	0					FALSE	0	0	0	0	Grey	0
754	CO Purchase	Formic Acid	Pipeline	FCEV filling	58	10	0.3	50000	0.2	0.08	5	8.34	969916855	-992539298	>25	0	0	N/A	391348	21.4184	13.4375	98.9374	-346528	0		#DIV/0!	#DIV/0!	#DIV/0!	#DIV/0!	#DIV/0!	#DIV/0!	#DIV/0!	0	#DIV/0!	#NUM!	#NUM!	0	TRUE	#DIV/0!	#DIV/0!	-1	-1	Grey	#DIV/0!
755	CO Purchase	Formic Acid	Railcar	Fertilizer	59	10	0.3	50000	0.2	0.08	5	4.91	205990525	525215194	7.08	0.158	0.281	113000	390814	21.1805	13.0769	97.725	11157162	0	164384	44435883	1.29605e+06	0	2.89588e+07	1.88206e+07	43197.2	1.2206e+07	0					FALSE	0	0	0	0	Grey	0
756	CO Purchase	Formic Acid	Railcar	FCEV filling	60	10	0.3	50000	0.2	0.08	5	5.07	208701880	1287814723	9.33	0.1132	0.234	163000	391185	22.9539	13.0985	98.1997	65302171	0	50000	15000000	437500	0	9.78476e+06	6.35318e+06	14581.9	4.1296e+06	0	300	5000	7.70988e-19	50000	TRUE	0	0	0	0	Grey	0
757	CO Purchase	Methanol	Pipeline	Fertilizer	61	10	0.3	50000	0.2	0.08	5	6.04	660025812	-528655612	>25	0	0.126	148000	386846	2.7198	3.83784	0.07848	8017521	0	164330	30576129	891804	0	1.97241e+07	1.27472e+07	29723.8	8.19653e+06	0					FALSE	0	0	-1	-1	Grey	0
758	CO Purchase	Methanol	Pipeline	FCEV filling	62	10	0.3	50000	0.2	0.08	5	9.75	1263006793	-1453219242	>25	0	0	N/A	387182	2.9697	4.05102	0.819711	-1607776	0		#DIV/0!	#DIV/0!	#DIV/0!	#DIV/0!	#DIV/0!	#DIV/0!	#DIV/0!	0	#DIV/0!	#NUM!	#NUM!	0	TRUE	#DIV/0!	#DIV/0!	-1	-1	Grey	#DIV/0!
759	CO Purchase	Methanol	Railcar	Fertilizer	63	10	0.3	50000	0.2	0.08	5	5.97	610665964	-442161368	>25	0	0.134	147000	386849	2.88134	3.81755	0.050325	8311507	0	164370	32728509	954582	0	2.11127e+07	1.36456e+07	31816.2	8.77372e+06	0					FALSE	0	0	-1	-1	Grey	0
760	CO Purchase	Methanol	Railcar	FCEV filling	64	10	0.3	50000	0.2	0.08	5	5.59	618709929	-461019018	>25	0	0.201	523000	387221	4.65691	3.83916	0.525644	28510021	0	50000	15000000	437500	0	9.6856e+06	6.25403e+06	14581.9	4.03044e+06	0	300	5000	7.70988e-19	50000	TRUE	0	0	-1	-1	Grey	0
761	Biomass Gasification	Gas H2	Pipeline	Fertilizer	1	10	100	50000	0.2	0.08	10	3.53	334259886	866732770	7.25	0.2794	0.474	116000	622705	20.975	9.54937	63.4985	18618366	0	164384	44248515	1.29058e+06	0	4.5947e+07	3.50702e+07	43015.1	2.92648e+07	0					FALSE	0	0	0	0	Grey	0
762	Biomass Gasification	Gas H2	Pipeline	FCEV filling	2	10	100	50000	0.2	0.08	10	4.08	933612158	-286696688	>25	0.0485	0.39	465000	623523	21.5821	10.067	65.2992	75333470	0	50000	15000000	437500	0	1.55962e+07	1.18886e+07	14581.9	9.94107e+06	0	300	5000	7.70988e-19	50000	TRUE	0	0	-1	-1	Grey	0
763	Biomass Gasification	Gas H2	Railcar	Fertilizer	3	10	100	50000	0.2	0.08	10	3.86	299482334	807759464	7.17	0.2503	0.427	113000	623546	20.2447	18.1117	45.8055	17022173	0	164384	44357729	1.29377e+06	0	4.61226e+07	3.51567e+07	43121.3	2.93993e+07	0					FALSE	0	0	0	0	Grey	0
764	Biomass Gasification	Gas H2	Railcar	FCEV filling	4	10	100	50000	0.2	0.08	10	8.54	370624982	-543046290	>25	0	0	N/A	623548	20.2537	18.1118	45.8077	-1246621	0	50000	15000000	437500	0	1.55969e+07	1.18886e+07	14581.9	9.9417e+06	0	300	5000	7.70988e-19	50000	TRUE	0	0	-1	-1	Grey	0
765	Biomass Gasification	Formic Acid	Pipeline	Fertilizer	5	10	100	50000	0.2	0.08	10	4.21	558509196	259400228	14.42	0.1754	0.38	134000	612130	21.0335	13.1094	97.7956	16902187	0	164384	41312770	1.20496e+06	0	4.21701e+07	3.27434e+07	40161.2	2.65947e+07	0					FALSE	0	0	0	0	Grey	0
766	Biomass Gasification	Formic Acid	Pipeline	FCEV filling	6	10	100	50000	0.2	0.08	10	5.52	1273289030	-1162932956	>25	0	0.231	194000	612649	21.4184	13.4375	98.9374	12144362	0	50000	15000000	437500	0	1.53242e+07	1.18886e+07	14581.9	9.66908e+06	0	300	5000	7.70988e-19	50000	TRUE	0	0	-1	-1	Grey	0
767	Biomass Gasification	Formic Acid	Railcar	Fertilizer	7	10	100	50000	0.2	0.08	10	4.15	509331586	364517012	12.92	0.1888	0.386	133000	612114	21.1805	13.0769	97.725	17040260	0	164384	41943475	1.22335e+06	0	4.28128e+07	3.32432e+07	40774.3	2.69996e+07	0					FALSE	0	0	0	0	Grey	0
768	Biomass Gasification	Formic Acid	Railcar	FCEV filling	8	10	100	50000	0.2	0.08	10	3.99	512074055	1287439032	15.7	0.144	0.376	282000	612486	22.9539	13.0985	98.1997	106444697	0	50000	15000000	437500	0	1.53202e+07	1.18886e+07	14581.9	9.665e+06	0	300	5000	7.70988e-19	50000	TRUE	0	0	0	0	Grey	0
769	Biomass Gasification	Liquid H2	Truck	Fertilizer	9	10	100	50000	0.2	0.08	10	5.22	698583952	-311678796	>25	0.0431	0.237	145000	687159	67.7389	58.1375	185.542	12429848	0	164382	36603179	1.06759e+06	0	4.19423e+07	2.90107e+07	35582.9	2.81425e+07	0					FALSE	0	0	-1	-1	Grey	0
770	Biomass Gasification	Liquid H2	Truck	FCEV filling	10	10	100	50000	0.2	0.08	10	4.72	705292618	-107904070		0.0177	0.297	462000	691526	73.9912	58.3152	191.176	68870118	0	50000	15000000	437500	0	1.72972e+07	1.18886e+07	14581.9	1.1642e+07	0	300	5000	7.70988e-19	50000	TRUE	0	0	-1	-1	Grey	0
771	Biomass Gasification	Liquid H2	Railcar	Fertilizer	11	10	100	50000	0.2	0.08	10	5.19	697220326	-301094341	>25	0.0471	0.244	144000	686701	67.0959	58.119	184.95	12536627	0	164383	36727274	1.07121e+06	0	4.20564e+07	2.9109e+07	35703.5	2.82099e+07	0					FALSE	0	0	-1	-1	Grey	0
772	Biomass Gasification	Liquid H2	Railcar	FCEV filling	12	10	100	50000	0.2	0.08	10	4.58	703853427	-435814	24.58	0.0342	0.311	411000	686738	67.2754	58.1211	184.998	74874209	0	50000	15000000	437500	0	1.71775e+07	1.18886e+07	14581.9	1.15223e+07	0	300	5000	7.70988e-19	50000	TRUE	0	0	-1	-1	Grey	0
773	CO2 Electrolysis PV Coupled	Methyl Formate	Pipeline	Fertilizer	13	10	0	50000	0.2	0.08	10	3.03	503842093	865052226	9.08	0.2998	0.541	123000	102307	14.4514	6.64772	92.5141	22603898	68.5	164384	43653653	1.27323e+06	17443.3	7.44738e+06	-2.51344e+06	42436.8	-9.01051e+06	225.205					FALSE	1.95881e+06	3.99142e+06	1.95881e+06	3.99142e+06	Grey	0
774	CO2 Electrolysis PV Coupled	Methyl Formate	Pipeline	FCEV filling	14	10	0	50000	0.2	0.08	10	3.36	1106059061	-111063692	>25	0.0649	0.473	466000	102724	14.7605	6.91136	93.4312	107093423	68.5	50000	15000000	437500	5993.75	2.56944e+06	-866203	14581.9	-3.08572e+06	68.5	300	5000	7.70988e-19	50000	TRUE	670808	1.37151e+06	-1	-1	Grey	0.454353
775	CO2 Electrolysis PV Coupled	Methyl Formate	Railcar	Fertilizer	15	10	0	50000	0.2	0.08	10	2.95	454610627	988685857	8.08	0.3149	0.548	114000	102303	14.6067	6.62211	92.4673	22823281	68.5	164384	44098775	1.28621e+06	17621.1	7.52297e+06	-2.53827e+06	42869.5	-9.10274e+06	225.205					FALSE	1.97886e+06	4.03212e+06	1.97886e+06	4.03212e+06	Grey	0
776	CO2 Electrolysis PV Coupled	Methyl Formate	Railcar	FCEV filling	16	10	0	50000	0.2	0.08	10	2.66	462479629	3009703914	9.42	0.2828	0.523	172000	102674	16.3822	6.64386	92.9425	150506608	68.5	50000	15000000	437500	5993.75	2.5682e+06	-863369	14581.9	-3.08696e+06	68.5	300	5000	7.70988e-19	50000	TRUE	671078	1.37151e+06	671078	1.37151e+06	Grey	0.454133
777	CO2 Electrolysis PV Coupled	Formic Acid	Pipeline	Fertilizer	17	10	0	50000	0.2	0.08	10	3.28519	1.02328e+09	1.49343e+08	17.5	0.1679	0.498	137000	6999.5	14.4594	6.65455	92.5379	2.49973e+07	273.9	164384	41143587	1.20002e+06	65737.2	480226	-8.90785e+06	39996.7	-1.50313e+07	900.493					FALSE	3.26768e+06	3.76192e+06	3.26768e+06	3.76192e+06	Green	0
778	CO2 Electrolysis PV Coupled	Formic Acid	Pipeline	FCEV filling	18	10	0	50000	0.2	0.08	10	3.32	1738068739	-1267361543	>25	0	0.517	515000	7518.03	14.8444	6.98271	93.6797	77956631	273.9	50000	15000000	437500	23966.2	188049	-3.2476e+06	14581.9	-5.46711e+06	273.9	300	5000	7.70988e-19	50000	TRUE	1.1885e+06	1.37151e+06	-1	-1	Green	0.0332526
779	CO2 Electrolysis PV Coupled	Formic Acid	Railcar	Fertilizer	19	10	0	50000	0.2	0.08	10	3.22	974104823	255445523	16.33	0.1813	0.505	135000	6983.9	14.6064	6.62209	92.4673	25135347	273.9	164384	41577007	1.21266e+06	66429.7	484203	-9.00169e+06	40418	-1.51908e+07	900.493					FALSE	3.30234e+06	3.80155e+06	3.30234e+06	3.80155e+06	Green	0
780	CO2 Electrolysis PV Coupled	Formic Acid	Railcar	FCEV filling	20	10	0	50000	0.2	0.08	10	2.49	976853764	1751916243	16.83	0.1365	0.537	294000	7355.12	16.3799	6.6437	92.942	165336121	273.9	50000	15000000	437500	23966.2	183974	-3.2476e+06	14581.9	-5.47119e+06	273.9	300	5000	7.70988e-19	50000	TRUE	1.18939e+06	1.37151e+06	1.18939e+06	1.37151e+06	Green	0.0325321
781	CO2 Electrolysis PV Coupled	Methanol	Pipeline	Fertilizer	21	10	0	50000	0.2	0.08	10	4.35	1427361656	-800847295	>25	0	0.351	147000	3015.23	0.026458	0.022571	0.07848	22004080	273.9	164382	36368910	1.06076e+06	58108.4	182863	-8.11574e+06	35355.1	-1.35286e+07	900.486					FALSE	2.941e+06	3.32535e+06	-1	-1	Green	0
782	CO2 Electrolysis PV Coupled	Methanol	Pipeline	FCEV filling	22	10	0	50000	0.2	0.08	10	5.17	2030373602	-1922149436	>25	0	0.297	202000	3351.86	0.276356	0.235755	0.819711	18949822	273.9	50000	15000000	437500	23966.2	83840.4	-3.3518e+06	14581.9	-5.57132e+06	273.9	300	5000	7.70988e-19	50000	TRUE	1.21116e+06	1.37151e+06	-1	-1	Green	0.0148254
783	CO2 Electrolysis PV Coupled	Methanol	Railcar	Fertilizer	23	10	0	50000	0.2	0.08	10	4.27	1378001808	-701711481	>25	0	0.354	148000	3018.95	0.187993	0.002288	0.050325	22293329	273.9	164383	37000805	1.07919e+06	59118	186270	-8.25555e+06	35969.4	-1.37634e+07	900.489					FALSE	2.99205e+06	3.38313e+06	-1	-1	Green	0
784	CO2 Electrolysis PV Coupled	Methanol	Railcar	FCEV filling	24	10	0	50000	0.2	0.08	10	2.92	1386076738	-131913909	>25	0	0.515	442000	3390.78	1.96356	0.023893	0.525644	137513759	273.9	50000	15000000	437500	23966.2	84813.9	-3.34676e+06	14581.9	-5.57035e+06	273.9	300	5000	7.70988e-19	50000	TRUE	1.21094e+06	1.37151e+06	-1	-1	Green	0.0149976
785	N2 Electrolysis PV Coupled	Ammonia	Pipeline	Fertilizer	25	10	0	50000	0.2	0.08	10	2.1	667556852	1106810436	8.67	0.3532	0.658	117000	29.2259	0.021691	0.018492	0.064338	27701848	249.5	164384	44161801	1.28805e+06	64273.8	2152.24	-1.00746e+07	42930.8	-1.66473e+07	820.274					FALSE	3.61898e+06	4.03788e+06	3.61898e+06	4.03788e+06	Green	0
786	N2 Electrolysis PV Coupled	Ammonia	Pipeline	FCEV filling	26	10	0	50000	0.2	0.08	10	2.88	1568292735	-722013828	>25	0	0.546	467000	305.261	0.226565	0.193148	0.672009	110262653	249.5	50000	15000000	437500	21831.2	7635.53	-3.42801e+06	14581.9	-5.64752e+06	249.5	300	5000	7.70988e-19	50000	TRUE	1.22772e+06	1.37151e+06	-1	-1	Green	0.00135018
787	N2 Electrolysis PV Coupled	Ammonia	Railcar	Fertilizer	27	10	0	50000	0.2	0.08	10	2	618951543	1238254685	7.75	0.3697	0.671	113000	8.94212	0.042679	0.000528	0.011422	27998721	249.5	164384	44516100	1.29839e+06	64789.5	663.795	-1.01558e+07	43275.2	-1.67824e+07	820.274					FALSE	3.64834e+06	4.07028e+06	3.64834e+06	4.07028e+06	Green	0
788	N2 Electrolysis PV Coupled	Ammonia	Railcar	FCEV filling	28	10	0	50000	0.2	0.08	10	1.99	927702689	2379451917	14.75	0.2126	0.599	267000	93.3996	0.445778	0.005514	0.119297	179370148	249.5	50000	15000000	437500	21831.2	2336.21	-3.42923e+06	14581.9	-5.65282e+06	249.5	300	5000	7.70988e-19	50000	TRUE	1.22887e+06	1.37151e+06	1.22887e+06	1.37151e+06	Green	0.000413111
789	H2O electrolysis PV Coupled	Gas H2	Pipeline	Fertilizer	29	10	0	50000	0.2	0.08	10	2.54	739931301	858650312	10.5	0.2927	0.6	125000	17574.2	14.401	3.09453	58.2408	26728472	249.5	164384	43531609	1.26967e+06	63356.6	1.27572e+06	-9.42488e+06	42318.2	-1.51362e+07	820.274					FALSE	3.29047e+06	3.98026e+06	3.29047e+06	3.98026e+06	Green	0
790	H2O electrolysis PV Coupled	Gas H2	Pipeline	FCEV filling	30	10	0	50000	0.2	0.08	10	2.58	1339299770	178610719	23.42	0.0602	0.561	435000	18392	15.0081	3.61215	60.0415	144221114	249.5	50000	15000000	437500	21831.2	460039	-3.2476e+06	14581.9	-5.19512e+06	249.5	300	5000	7.70988e-19	50000	TRUE	1.12937e+06	1.37151e+06	1.12937e+06	1.37151e+06	Green	0.0813485
791	H2O electrolysis PV Coupled	Gas H2	Railcar	Fertilizer	31	10	0	50000	0.2	0.08	10	2.85	705153750	799305784	10.67	0.2636	0.552	125000	18415.5	13.6706	11.6568	40.5477	25132278	249.5	164384	43560639	1.27052e+06	63398.9	1.33769e+06	-9.43116e+06	42346.4	-1.50851e+07	820.274					FALSE	3.27938e+06	3.98292e+06	3.27938e+06	3.98292e+06	Green	0
792	H2O electrolysis PV Coupled	Gas H2	Railcar	FCEV filling	32	10	0	50000	0.2	0.08	10	6	776421885	-745900832	>25	0	0.155	377000	18417.4	13.6797	11.657	40.55	15353773	249.5	50000	15000000	437500	21831.2	460676	-3.2476e+06	14581.9	-5.19448e+06	249.5	300	5000	7.70988e-19	50000	TRUE	1.12924e+06	1.37151e+06	-1	-1	Green	0.0814611
793	H2O electrolysis PV Coupled	Formic Acid	Pipeline	Fertilizer	33	10	0	50000	0.2	0.08	10	3.95	922272260	19245253	19	0.1174	0.406	139000	146211	14.4594	6.65455	92.5379	21015388	249.5	164383	40704738	1.18722e+06	59242.4	9.92434e+06	636399	39570.1	-5.42178e+06	820.274					FALSE	1.17865e+06	3.72179e+06	1.17865e+06	3.72179e+06	Grey	0
794	H2O electrolysis PV Coupled	Formic Acid	Pipeline	FCEV filling	34	10	0	50000	0.2	0.08	10	4.52	1637027602	-1449276674	>25	0	0.377	347000	146730	14.8444	6.98271	93.6797	31648003	249.5	50000	15000000	437500	21831.2	3.67016e+06	234518	14581.9	-1.985e+06	249.5	300	5000	7.70988e-19	50000	TRUE	431521	1.37151e+06	-1	-1	Grey	0.648992
795	H2O electrolysis PV Coupled	Formic Acid	Railcar	Fertilizer	35	10	0	50000	0.2	0.08	10	3.89	873094650	124134557	17.58	0.1308	0.408	139000	146196	14.6064	6.62209	92.4673	21153464	249.5	164384	41228938	1.20251e+06	60005.3	1.00511e+07	644594	40079.7	-5.49267e+06	820.274					FALSE	1.19406e+06	3.76972e+06	1.19406e+06	3.76972e+06	Grey	0
796	H2O electrolysis PV Coupled	Formic Acid	Railcar	FCEV filling	36	10	0	50000	0.2	0.08	10	3.27	875812627	1241396542	17.92	0.0861	0.447	301000	146567	16.3799	6.6437	92.942	137046810	249.5	50000	15000000	437500	21831.2	3.66609e+06	234518	14581.9	-1.98907e+06	249.5	300	5000	7.70988e-19	50000	TRUE	432407	1.37151e+06	432407	1.37151e+06	Grey	0.648272
797	H2O electrolysis PV Coupled	Liquid H2	Truck	Fertilizer	37	10	0	50000	0.2	0.08	10	4.23	1104255368	-350248184	>25	0.0556	0.366	144000	82028.8	61.1648	51.6827	180.284	20540078	249.5	164383	38690027	1.12846e+06	56310.1	5.29226e+06	-8.37664e+06	37611.5	-9.29429e+06	820.273					FALSE	2.0205e+06	3.53758e+06	-1	-1	Grey	0
798	H2O electrolysis PV Coupled	Liquid H2	Truck	FCEV filling	38	10	0	50000	0.2	0.08	10	3.2	1110964034	428379368	22.33	0.0303	0.47	400000	86395.7	67.4171	51.8604	185.918	134311560	249.5	50000	15000000	437500	21831.2	2.16102e+06	-3.2476e+06	14581.9	-3.49414e+06	249.5	300	5000	7.70988e-19	50000	TRUE	759595	1.37151e+06	759595	1.37151e+06	Grey	0.382132
799	H2O electrolysis PV Coupled	Liquid H2	Railcar	Fertilizer	39	10	0	50000	0.2	0.08	10	4.2	1102891742	-338953547	24.92	0.0597	0.372	142000	81570.4	60.5219	51.6641	179.692	20646844	249.5	164383	38752809	1.13029e+06	56401.5	5.27123e+06	-8.39024e+06	37672.6	-9.339e+06	820.273					FALSE	2.03022e+06	3.54332e+06	-1	-1	Grey	0
800	H2O electrolysis PV Coupled	Liquid H2	Railcar	FCEV filling	40	10	0	50000	0.2	0.08	10	3.16	1109654952	467325855	22.08	0.0378	0.478	394000	81607.8	60.7013	51.6662	179.74	135519847	249.5	50000	15000000	437500	21831.2	2.04126e+06	-3.2476e+06	14581.9	-3.6139e+06	249.5	300	5000	7.70988e-19	50000	TRUE	785630	1.37151e+06	785630	1.37151e+06	Grey	0.360955
801	SMR	Gas H2	Pipeline	Fertilizer	41	10	6.5	50000	0.2	0.08	10	1.84	176346938	1803196082	2.83	0.4732	0.696	71000	147410	68.5876	3.09453	177.237	25518467	0	164384	45987100	1.34129e+06	0	1.13042e+07		44705.2	-6.03344e+06	0					FALSE	1.31162e+06	4.20478e+06	1.31162e+06	4.20478e+06	Grey	0
802	SMR	Gas H2	Pipeline	FCEV filling	42	10	6.5	50000	0.2	0.08	10	2.59	775699211	1596318947	16.42	0.2424	0.572	297000	148228	69.1946	3.61215	179.038	146219180	0	50000	15000000	437500	0	3.70764e+06		14581.9	-1.94752e+06	0	300	5000	7.70988e-19	50000	TRUE	423374	1.37151e+06	423374	1.37151e+06	Grey	0.655619
803	SMR	Gas H2	Railcar	Fertilizer	43	10	6.5	50000	0.2	0.08	10	2.16	141569387	1744158642	2.42	0.4442	0.648	65000	148251	67.8572	11.6568	159.544	23922273	0	164384	46103426	1.34468e+06	0	1.13975e+07		44818.3	-5.98402e+06	0					FALSE	1.30087e+06	4.21542e+06	1.30087e+06	4.21542e+06	Grey	0
804	SMR	Gas H2	Railcar	FCEV filling	44	10	6.5	50000	0.2	0.08	10	5.82	212821327	501161015	15.5	0.0306	0.141	274000	148253	67.8662	11.657	159.547	42128025	0	50000	15000000	437500	0	3.70827e+06		14581.9	-1.94689e+06	0	300	5000	7.70988e-19	50000	TRUE	423236	1.37151e+06	423236	1.37151e+06	Grey	0.655731
805	SMR	Formic Acid	Pipeline	Fertilizer	45	10	6.5	50000	0.2	0.08	10	2.34	357245215	1309203720	6	0.3982	0.639	108000	136835	68.646	0.034745	211.535	24548460	0	164384	44772623	1.30587e+06	0	1.02161e+07	-789508	43524.6	-6.66361e+06	0					FALSE	1.44861e+06	4.09373e+06	1.44861e+06	4.09373e+06	Grey	0
806	SMR	Formic Acid	Pipeline	FCEV filling	46	10	6.5	50000	0.2	0.08	10	3.03	1072000557	167960712	23.5	0.1175	0.518	426000	137354	69.031	0.362905	212.676	119984187	0	50000	15000000	437500	0	3.43565e+06	-271992	14581.9	-2.21951e+06	0	300	5000	7.70988e-19	50000	TRUE	482503	1.37151e+06	482503	1.37151e+06	Grey	0.607523
807	SMR	Formic Acid	Railcar	Fertilizer	47	10	6.5	50000	0.2	0.08	10	2.27	308067605	1430763857	5.12	0.4116	0.647	101000	136820	68.793	0.002288	211.464	24686531	0	164384	45141752	1.31663e+06	0	1.02992e+07	-860521	43883.4	-6.71972e+06	0					FALSE	1.46081e+06	4.12749e+06	1.46081e+06	4.12749e+06	Grey	0
808	SMR	Formic Acid	Railcar	FCEV filling	48	10	6.5	50000	0.2	0.08	10	2.31	310785582	3707855060	6	0.3668	0.58	122000	137191	70.5665	0.023893	211.939	156094616	0	50000	15000000	437500	0	3.43157e+06	-276702	14581.9	-2.22359e+06	0	300	5000	7.70988e-19	50000	TRUE	483389	1.37151e+06	483389	1.37151e+06	Grey	0.606802
809	SMR	Liquid H2	Truck	Fertilizer	49	10	6.5	50000	0.2	0.08	10	3.64	540671004	492362389	11.8	0.237	0.458	128000	211865	115.351	51.6827	299.28	19330139	0	164384	42269198	1.23285e+06	0	1.49334e+07	4.54312e+06	41090.9	-1.00254e+06	0					FALSE	217943	3.86484e+06	217943	3.86484e+06	Grey	0
810	SMR	Liquid H2	Truck	FCEV filling	50	10	6.5	50000	0.2	0.08	10	3.26	547379670	1910353947	13.75	0.2116	0.469	257000	216232	121.604	51.8604	304.915	130370003	0	50000	15000000	437500	0	5.40862e+06	1.70098e+06	14581.9	-246539	0	300	5000	7.70988e-19	50000	TRUE	53595.5	1.37151e+06	53595.5	1.37151e+06	Grey	0.956403
811	SMR	Liquid H2	Railcar	Fertilizer	51	10	6.5	50000	0.2	0.08	10	3.6	539307379	504567581	11.67	0.2411	0.462	127000	211406	114.709	51.6641	298.689	19436903	0	164384	42311723	1.23409e+06	0	1.49161e+07	4.45599e+06	41132.3	-1.03589e+06	0					FALSE	225193	3.86872e+06	225193	3.86872e+06	Grey	0
812	SMR	Liquid H2	Railcar	FCEV filling	52	10	6.5	50000	0.2	0.08	10	3.21	546070589	1953283686	13.5	0.2191	0.477	255000	211444	114.888	51.6662	298.737	131281973	0	50000	15000000	437500	0	5.28886e+06	1.58059e+06	14581.9	-366300	0	300	5000	7.70988e-19	50000	TRUE	79630.3	1.37151e+06	79630.3	1.37151e+06	Grey	0.935225
813	CO Purchase	Methyl Formate	Pipeline	Fertilizer	53	10	0.3	50000	0.2	0.08	10	6.3	258786997	-116974811	24.92	0.007	0.091	136000	486138	21.0254	13.1026	97.7719	4525269	0	164383	36567718	1.06656e+06	0	2.96438e+07	2.12998e+07	35548.4	1.58573e+07	0					FALSE	0	0	-1	-1	Grey	0
814	CO Purchase	Methyl Formate	Pipeline	FCEV filling	54	10	0.3	50000	0.2	0.08	10	9.24	860973000	-1087480235	>25	0	0	N/A	486554	21.3346	13.3662	98.6889	-1939415	0	50000	15000000	437500	0	1.21702e+07	8.73458e+06	14581.9	6.51506e+06	0	300	5000	7.70988e-19	50000	TRUE	0	0	-1	-1	Grey	0
815	CO Purchase	Methyl Formate	Railcar	Fertilizer	55	10	0.3	50000	0.2	0.08	10	6.23	209555531	-12065232	18.25	0.0221	0.101	133000	486133	21.1807	13.077	97.7251	4744709	0	164383	39706020	1.15809e+06	0	3.21875e+07	2.31285e+07	38599.2	1.72179e+07	0					FALSE	0	0	-1	-1	Grey	0
816	CO Purchase	Methyl Formate	Railcar	FCEV filling	56	10	0.3	50000	0.2	0.08	10	6.25	217393568	-25314044	23.83	0	0.09	322000	486505	22.9563	13.0987	98.2002	22234532	0	50000	15000000	437500	0	1.2169e+07	8.73741e+06	14581.9	6.51382e+06	0	300	5000	7.70988e-19	50000	TRUE	0	0	-1	-1	Grey	0
817	CO Purchase	Formic Acid	Pipeline	Fertilizer	57	10	0.3	50000	0.2	0.08	10	5.03	255233190	388381569	9.25	0.14	0.266	119000	390830	21.0335	13.1094	97.7956	10805214	0	164384	43435464	1.26687e+06	0	2.83079e+07	1.83969e+07	42224.7	1.19323e+07	0					FALSE	0	0	0	0	Grey	0
818	CO Purchase	Formic Acid	Pipeline	FCEV filling	58	10	0.3	50000	0.2	0.08	10	8.39	969981910	-1001006726	>25	0	0	N/A	391348	21.4184	13.4375	98.9374	-411583	0	50000	15000000	437500	0	9.78883e+06	6.35318e+06	14581.9	4.13367e+06	0	300	5000	7.70988e-19	50000	TRUE	0	0	-1	-1	Grey	0
819	CO Purchase	Formic Acid	Railcar	Fertilizer	59	10	0.3	50000	0.2	0.08	10	4.96	206055580	507068240	7.25	0.1534	0.275	114000	390814	21.1805	13.0769	97.725	10943284	0	164384	44378715	1.29438e+06	0	2.89215e+07	1.87964e+07	43141.7	1.21903e+07	0					FALSE	0	0	0	0	Grey	0
820	CO Purchase	Formic Acid	Railcar	FCEV filling	60	10	0.3	50000	0.2	0.08	10	5.12	208766934	1241811136	9.5	0.1087	0.228	162000	391185	22.9539	13.0985	98.1997	63882125	0	50000	15000000	437500	0	9.78476e+06	6.35318e+06	14581.9	4.1296e+06	0	300	5000	7.70988e-19	50000	TRUE	0	0	0	0	Grey	0
821	CO Purchase	Methanol	Pipeline	Fertilizer	61	10	0.3	50000	0.2	0.08	10	6.07	660090866	-540424819	>25	0	0.121	148000	386846	2.7198	3.83784	0.07848	7800963	0	164307	29985457	874576	0	1.9343e+07	1.2501e+07	29149.6	8.03818e+06	0					FALSE	0	0	-1	-1	Grey	0
822	CO Purchase	Methanol	Pipeline	FCEV filling	62	10	0.3	50000	0.2	0.08	10	9.79	1263071847	-1461686671	>25	0	0	N/A	387182	2.9697	4.05102	0.819711	-1672830	0		#DIV/0!	#DIV/0!	#DIV/0!	#DIV/0!	#DIV/0!	#DIV/0!	#DIV/0!	0	#DIV/0!	#NUM!	#NUM!	0	TRUE	#DIV/0!	#DIV/0!	-1	-1	Grey	#DIV/0!
823	CO Purchase	Methanol	Railcar	Fertilizer	63	10	0.3	50000	0.2	0.08	10	6.01	610731019	-454825927	>25	0	0.128	149000	386849	2.88134	3.81755	0.050325	8097076	0	164365	32255061	940773	0	2.08073e+07	1.34482e+07	31356	8.6468e+06	0					FALSE	0	0	-1	-1	Grey	0
824	CO Purchase	Methanol	Railcar	FCEV filling	64	10	0.3	50000	0.2	0.08	10	5.65	618774983	-483945915	>25	0	0.195	515000	387221	4.65691	3.83916	0.525644	25058404	0	50000	15000000	437500	0	9.6856e+06	6.25403e+06	14581.9	4.03044e+06	0	300	5000	7.70988e-19	50000	TRUE	0	0	-1	-1	Grey	0
825	Biomass Gasification	Gas H2	Pipeline	Fertilizer	1	10% annual price reduction		50000	0.2			3.42	334150594	940767377	6.67	0.287	0.483	108000	622705	20.975	9.54937	63.4985	18977682	0	164384	44552422	1.29945e+06	0	4.62626e+07	3.5311e+07	43310.5	2.94658e+07	0					FALSE	0	0	0	0	Grey	0
826	Biomass Gasification	Gas H2	Pipeline	FCEV filling	2	10% annual price reduction		50000	0.2			3.76	933502866	523806846	18.83	0.056	0.391	282000	623523	21.5821	10.067	65.2992	102110336	0	50000	15000000	437500	0	1.55962e+07	1.18886e+07	14581.9	9.94107e+06	0	300	5000	7.70988e-19	50000	TRUE	0	0	0	0	Grey	0
827	Biomass Gasification	Gas H2	Railcar	Fertilizer	3	10% annual price reduction		50000	0.2			3.75	299373042	876466222	6.5	0.2579	0.437	108000	623546	20.2447	18.1117	45.8055	17381488	0	164384	44647401	1.30222e+06	0	4.64238e+07	3.53863e+07	43402.9	2.95913e+07	0					FALSE	0	0	0	0	Grey	0
828	Biomass Gasification	Gas H2	Railcar	FCEV filling	4	10% annual price reduction		50000	0.2			8.54	3.70625e+08	-5.43046e+08	>25 years	0	0	N/A	623548	20.2537	18.1118	45.8077	-1.24662e+06	0	50000	15000000	437500	0	1.55969e+07	1.18886e+07	14581.9	9.9417e+06	0	300	5000	7.70988e-19	50000	TRUE	0	0	-1	-1	Grey	0
829	Biomass Gasification	Formic Acid	Pipeline	Fertilizer	5	10% annual price reduction		50000	0.2			3.97	558290625	406332610	12.17	0.1906	0.403	127000	612130	21.0335	13.1094	97.7956	17620783	0	164384	42325895	1.23451e+06	0	4.32042e+07	3.35463e+07	41146.1	2.72469e+07	0					FALSE	0	0	0	0	Grey	0
830	Biomass Gasification	Formic Acid	Pipeline	FCEV filling	6	10% annual price reduction		50000	0.2			4.15	1273070458	-633402178	24.92	0	0.336	329000	612649	21.4184	13.4375	98.9374	73807378	0	50000	15000000	437500	0	1.53242e+07	1.18886e+07	14581.9	9.66908e+06	0	300	5000	7.70988e-19	50000	TRUE	0	0	-1	-1	Grey	0
831	Biomass Gasification	Formic Acid	Railcar	Fertilizer	7	10% annual price reduction		50000	0.2			3.92	509113015	503255386	11	0.204	0.401	128000	612114	21.1805	13.0769	97.725	17758854	0	164384	42800980	1.24836e+06	0	4.3688e+07	3.39229e+07	41607.9	2.75516e+07	0					FALSE	0	0	0	0	Grey	0
832	Biomass Gasification	Formic Acid	Railcar	FCEV filling	8	10% annual price reduction		50000	0.2			3.66	511855483	1894531500	12	0.1592	0.39	193000	612486	22.9539	13.0985	98.1997	112679936	0	50000	15000000	437500	0	1.53202e+07	1.18886e+07	14581.9	9.665e+06	0	300	5000	7.70988e-19	50000	TRUE	0	0	0	0	Grey	0
833	Biomass Gasification	Liquid H2	Truck	Fertilizer	9	10% annual price reduction		50000	0.2			5.02	698474660	-176977309	21.58	0.0507	0.256	136000	687159	67.7389	58.1375	185.542	12789326	0	164383	38856702	1.13332e+06	0	4.45245e+07	3.07968e+07	37773.6	2.98752e+07	0					FALSE	0	0	-1	-1	Grey	0
834	Biomass Gasification	Liquid H2	Truck	FCEV filling	10	10% annual price reduction		50000	0.2			4.41	705183326	574027775	18.25	0.0253	0.3	273000	691526	73.9912	58.3152	191.176	85902896	0	50000	15000000	437500	0	1.72972e+07	1.18886e+07	14581.9	1.1642e+07	0	300	5000	7.70988e-19	50000	TRUE	0	0	0	0	Grey	0
835	Biomass Gasification	Liquid H2	Railcar	Fertilizer	11	10% annual price reduction		50000	0.2			4.99	697111034	-166510929	21.25	0.0547	0.261	134000	686701	67.0959	58.119	184.95	12896091	0	164383	38940560	1.13577e+06	0	4.45909e+07	3.08632e+07	37855.1	2.99099e+07	0					FALSE	0	0	-1	-1	Grey	0
836	Biomass Gasification	Liquid H2	Railcar	FCEV filling	12	10% annual price reduction		50000	0.2			4.37	703874244	609175019	18.08	0.0328	0.307	275000	686738	67.2754	58.1211	184.998	86923146	0	50000	15000000	437500	0	1.71775e+07	1.18886e+07	14581.9	1.15223e+07	0	300	5000	7.70988e-19	50000	TRUE	0	0	0	0	Grey	0
837	CO2 Electrolysis PV Coupled	Methyl Formate	Pipeline	Fertilizer	13	10% annual price reduction		50000	0.2			2.88	503732802	963362682	8.25	0.3074	0.553	116000	102307	14.4514	6.64772	92.5141	22963214	68.5	164384	44050767	1.28481e+06	17602	7.51513e+06	-2.5363e+06	42822.9	-9.09248e+06	225.206					FALSE	1.97663e+06	4.02773e+06	1.97663e+06	4.02773e+06	Grey	0
838	CO2 Electrolysis PV Coupled	Methyl Formate	Pipeline	FCEV filling	14	10% annual price reduction		50000	0.2			2.98	1105949769	885529611	18.08	0.0725	0.477	274000	102724	14.7605	6.91136	93.4312	131070174	68.5	50000	15000000	437500	5993.75	2.56944e+06	-866203	14581.9	-3.08572e+06	68.5	300	5000	7.70988e-19	50000	TRUE	670808	1.37151e+06	670808	1.37151e+06	Grey	0.454353
839	CO2 Electrolysis PV Coupled	Methyl Formate	Railcar	Fertilizer	15	10% annual price reduction		50000	0.2			2.8	454501336	1077141212	7.33	0.3225	0.562	113000	102303	14.6067	6.62211	92.4673	23182597	68.5	164384	44415797	1.29546e+06	17747.8	7.57705e+06	-2.55652e+06	43177.7	-9.16818e+06	225.206					FALSE	1.99308e+06	4.06111e+06	1.99308e+06	4.06111e+06	Grey	0
840	CO2 Electrolysis PV Coupled	Methyl Formate	Railcar	FCEV filling	16	10% annual price reduction		50000	0.2			2.41	462370337	3385403404	8.08	0.2904	0.539	138000	102674	16.3822	6.64386	92.9425	152960480	68.5	50000	15000000	437500	5993.75	2.5682e+06	-863369	14581.9	-3.08696e+06	68.5	300	5000	7.70988e-19	50000	TRUE	671078	1.37151e+06	671078	1.37151e+06	Grey	0.454133
841	CO2 Electrolysis PV Coupled	Formic Acid	Pipeline	Fertilizer	17	10% annual price reduction		50000	0.2			3.03	1023173141	320415110	15.08	0.1755	0.515	130000	6999.5	14.4594	6.65455	92.5379	25356597	273.9	164384	42058411	1.2267e+06	67198.8	490903	-9.10592e+06	40886	-1.53656e+07	900.496					FALSE	3.34034e+06	3.84556e+06	3.34034e+06	3.84556e+06	Green	0
842	CO2 Electrolysis PV Coupled	Formic Acid	Pipeline	FCEV filling	18	10% annual price reduction		50000	0.2			2.55	1737959447	-134281317	22	0	0.507	319000	7518.03	14.8444	6.98271	93.6797	139233822	273.9	50000	15000000	437500	23966.2	188049	-3.2476e+06	14581.9	-5.46711e+06	273.9	300	5000	7.70988e-19	50000	TRUE	1.1885e+06	1.37151e+06	-1	-1	Green	0.0332526
843	CO2 Electrolysis PV Coupled	Formic Acid	Railcar	Fertilizer	19	10% annual price reduction		50000	0.2			2.98	973995531	417235234	14.17	0.1889	0.524	127000	6983.9	14.6064	6.62209	92.4673	25494668	273.9	164384	42391743	1.23643e+06	67731.4	493691	-9.17809e+06	41210.1	-1.54884e+07	900.496					FALSE	3.36705e+06	3.87604e+06	3.36705e+06	3.87604e+06	Green	0
844	CO2 Electrolysis PV Coupled	Formic Acid	Railcar	FCEV filling	20	10% annual price reduction		50000	0.2			2.07	976744472	2557928503	13.25	0.1441	0.546	222000	7355.12	16.3799	6.6437	92.942	168990757	273.9	50000	15000000	437500	23966.2	183974	-3.2476e+06	14581.9	-5.47119e+06	273.9	300	5000	7.70988e-19	50000	TRUE	1.18939e+06	1.37151e+06	1.18939e+06	1.37151e+06	Green	0.0325321
845	CO2 Electrolysis PV Coupled	Methanol	Pipeline	Fertilizer	21	10% annual price reduction		50000	0.2			3.99	1427252364	-567773693	>25 years	0	0.383	139000	3015.23	0.026458	0.022571	0.07848	22363728	273.9	164383	38587721	1.12548e+06	61653.5	194020	-8.61086e+06	37512.1	-1.4354e+07	900.49					FALSE	3.12043e+06	3.52823e+06	-1	-1	Green	0
846	CO2 Electrolysis PV Coupled	Methanol	Pipeline	FCEV filling	22	10% annual price reduction		50000	0.2			3.02	2030264310	-1222592549	>25 years	0	0.456	336000	3351.86	0.276356	0.235755	0.819711	104135290	273.9	50000	15000000	437500	23966.2	83840.4	-3.3518e+06	14581.9	-5.57132e+06	273.9	300	5000	7.70988e-19	50000	TRUE	1.21116e+06	1.37151e+06	-1	-1	Green	0.0148254
847	CO2 Electrolysis PV Coupled	Methanol	Railcar	Fertilizer	23	10% annual price reduction		50000	0.2			3.92	1377892517	-473376939	>25 years	0.0039	0.392	138000	3018.95	0.187993	0.002288	0.050325	22652855	273.9	164383	39028954	1.13834e+06	62358.5	196481	-8.70807e+06	37941	-1.45179e+07	900.49					FALSE	3.15605e+06	3.56857e+06	-1	-1	Green	0
848	CO2 Electrolysis PV Coupled	Methanol	Railcar	FCEV filling	24	10% annual price reduction		50000	0.2			2.35	1385967446	1065634840	18.33	0	0.519	287000	3390.78	1.96356	0.023893	0.525644	159727303	273.9	50000	15000000	437500	23966.2	84813.9	-3.34676e+06	14581.9	-5.57035e+06	273.9	300	5000	7.70988e-19	50000	TRUE	1.21094e+06	1.37151e+06	1.21094e+06	1.37151e+06	Green	0.0149976
849	N2 Electrolysis PV Coupled	Ammonia	Pipeline	Fertilizer	25	10% annual price reduction		50000	0.2			1.95	667447561	1204566665	7.92	0.3607	0.669	112000	29.2259	0.021691	0.018492	0.064338	28061163	249.5	164384	44456230	1.29664e+06	64702.3	2166.59	-1.01418e+07	43217	-1.67583e+07	820.276					FALSE	3.64311e+06	4.06481e+06	3.64311e+06	4.06481e+06	Green	0
850	N2 Electrolysis PV Coupled	Ammonia	Pipeline	FCEV filling	26	10% annual price reduction		50000	0.2			2.33	1568183444	476640899	19.92	0	0.541	290000	305.261	0.226565	0.193148	0.672009	150697955	249.5	50000	15000000	437500	21831.2	7635.53	-3.42801e+06	14581.9	-5.64752e+06	249.5	300	5000	7.70988e-19	50000	TRUE	1.22772e+06	1.37151e+06	1.22772e+06	1.37151e+06	Green	0.00135018
851	N2 Electrolysis PV Coupled	Ammonia	Railcar	Fertilizer	27	10% annual price reduction		50000	0.2			1.86	618842251	1326051197	7.25	0.3772	0.677	109000	8.94212	0.042679	0.000528	0.011422	28358036	249.5	164384	44751208	1.30524e+06	65131.7	667.301	-1.02094e+07	43503.8	-1.6871e+07	820.276					FALSE	3.66761e+06	4.09178e+06	3.66761e+06	4.09178e+06	Green	0
852	N2 Electrolysis PV Coupled	Ammonia	Railcar	FCEV filling	28	10% annual price reduction		50000	0.2			1.62	927593397	3110511175	11.92	0.2202	0.613	199000	93.3996	0.445778	0.005514	0.119297	183010757	249.5	50000	15000000	437500	21831.2	2336.21	-3.42923e+06	14581.9	-5.65282e+06	249.5	300	5000	7.70988e-19	50000	TRUE	1.22887e+06	1.37151e+06	1.22887e+06	1.37151e+06	Green	0.000413111
853	H2O electrolysis PV Coupled	Gas H2	Pipeline	Fertilizer	29	10% annual price reduction		50000	0.2			2.36	739822010	973560779	9.5	0.3003	0.609	119000	17574.2	14.401	3.09453	58.2408	27087788	249.5	164384	43939640	1.28157e+06	63950.5	1.28768e+06	-9.51322e+06	42714.8	-1.5278e+07	820.276					FALSE	3.32131e+06	4.01757e+06	3.32131e+06	4.01757e+06	Green	0
854	H2O electrolysis PV Coupled	Gas H2	Pipeline	FCEV filling	30	10% annual price reduction		50000	0.2			2.12	1339190478	1336546694	17.25	0.0678	0.565	266000	18392	15.0081	3.61215	60.0415	163510992	249.5	50000	15000000	437500	21831.2	460039	-3.2476e+06	14581.9	-5.19512e+06	249.5	300	5000	7.70988e-19	50000	TRUE	1.12937e+06	1.37151e+06	1.12937e+06	1.37151e+06	Green	0.0813485
855	H2O electrolysis PV Coupled	Gas H2	Railcar	Fertilizer	31	10% annual price reduction		50000	0.2			2.68	705044458	908768902	9.67	0.2712	0.566	117000	18415.5	13.6706	11.6568	40.5477	25491594	249.5	164384	43965894	1.28234e+06	63988.7	1.35013e+06	-9.5189e+06	42740.3	-1.52255e+07	820.276					FALSE	3.30989e+06	4.01997e+06	3.30989e+06	4.01997e+06	Green	0
856	H2O electrolysis PV Coupled	Gas H2	Railcar	FCEV filling	32	10% annual price reduction		50000	0.2			5.36	776312593	-310731138	24.08	0	0.173	955000	18417.4	13.6797	11.657	40.55	50535328	249.5	50000	15000000	437500	21831.2	460676	-3.2476e+06	14581.9	-5.19448e+06	249.5	300	5000	7.70988e-19	50000	TRUE	1.12924e+06	1.37151e+06	-1	-1	Green	0.0814611
857	H2O electrolysis PV Coupled	Formic Acid	Pipeline	Fertilizer	33	10% annual price reduction		50000	0.2			3.72	922162968	176271106	16.17	0.125	0.424	132000	146211	14.4594	6.65455	92.5379	21374713	249.5	164384	41737106	1.21733e+06	60744.9	1.0176e+07	652539	40573.7	-5.55929e+06	820.276					FALSE	1.20854e+06	3.81619e+06	1.20854e+06	3.81619e+06	Grey	0
858	H2O electrolysis PV Coupled	Formic Acid	Pipeline	FCEV filling	34	10% annual price reduction		50000	0.2			3.37	1636918310	-643949303	24.2	0	0.417	321000	146730	14.8444	6.98271	93.6797	104810477	249.5	50000	15000000	437500	21831.2	3.67016e+06	234518	14581.9	-1.985e+06	249.5	300	5000	7.70988e-19	50000	TRUE	431521	1.37151e+06	-1	-1	Grey	0.648992
859	H2O electrolysis PV Coupled	Formic Acid	Railcar	Fertilizer	35	10% annual price reduction		50000	0.2			3.67	872985358	272101379	15.17	0.1384	0.432	132000	146196	14.6064	6.62209	92.4673	21512785	249.5	164384	42136128	1.22897e+06	61325.6	1.02722e+07	658778	40961.6	-5.61353e+06	820.276					FALSE	1.22033e+06	3.85267e+06	1.22033e+06	3.85267e+06	Grey	0
860	H2O electrolysis PV Coupled	Formic Acid	Railcar	FCEV filling	36	10% annual price reduction		50000	0.2			2.89	875703335	1981880544	14	0.0937	0.452	223000	146567	16.3799	6.6437	92.942	142122346	249.5	50000	15000000	437500	21831.2	3.66609e+06	234518	14581.9	-1.98907e+06	249.5	300	5000	7.70988e-19	50000	TRUE	432407	1.37151e+06	432407	1.37151e+06	Grey	0.648272
861	H2O electrolysis PV Coupled	Liquid H2	Truck	Fertilizer	37	10% annual price reduction		50000	0.2			3.95	1104146076	-162945671	20.75	0.0632	0.391	134000	82028.8	61.1648	51.6827	180.284	20899445	249.5	164383	40247391	1.17388e+06	58576.7	5.50529e+06	-8.71382e+06	39125.5	-9.66841e+06	820.271					FALSE	2.10183e+06	3.67998e+06	-1	-1	Grey	0
862	H2O electrolysis PV Coupled	Liquid H2	Truck	FCEV filling	38	10% annual price reduction		50000	0.2			2.75	1110854742	1414800998	16.58	0.0379	0.47	261000	86395.7	67.4171	51.8604	185.918	146495837	249.5	50000	15000000	437500	21831.2	2.16102e+06	-3.2476e+06	14581.9	-3.49414e+06	249.5	300	5000	7.70988e-19	50000	TRUE	759595	1.37151e+06	759595	1.37151e+06	Grey	0.382132
863	H2O electrolysis PV Coupled	Liquid H2	Railcar	Fertilizer	39	10% annual price reduction		50000	0.2			3.92	1102782450	-151976808	20.5	0.0673	0.397	135000	81570.4	60.5219	51.6641	179.692	21006210	249.5	164383	40291892	1.17518e+06	58641.5	5.48057e+06	-8.72346e+06	39168.8	-9.7099e+06	820.271					FALSE	2.11085e+06	3.68404e+06	-1	-1	Grey	0
864	H2O electrolysis PV Coupled	Liquid H2	Railcar	FCEV filling	40	10% annual price reduction		50000	0.2			2.72	1109545660	1450847674	16.5	0.0453	0.478	253000	81607.8	60.7013	51.6662	179.74	147439729	249.5	50000	15000000	437500	21831.2	2.04126e+06	-3.2476e+06	14581.9	-3.6139e+06	249.5	300	5000	7.70988e-19	50000	TRUE	785630	1.37151e+06	785630	1.37151e+06	Grey	0.360955
865	SMR	Gas H2	Pipeline	Fertilizer	41	10% annual price reduction		50000	0.2			1.79	176292286	1831805323	2.75	0.477	0.702	72000	147410	68.5876	3.09453	177.238	25698144	0	164384	46018682	1.34221e+06	0	1.1312e+07		44735.9	-6.03758e+06	0					FALSE	1.31252e+06	4.20767e+06	1.31252e+06	4.20767e+06	Grey	0
866	SMR	Gas H2	Pipeline	FCEV filling	42	10% annual price reduction		50000	0.2			2.39	775644559	2315944400	12.75	0.2462	0.568	205000	148228	69.1946	3.61215	179.038	150842119	0	50000	15000000	437500	0	3.70764e+06		14581.9	-1.94752e+06	0	300	5000	7.70988e-19	50000	TRUE	423374	1.37151e+06	423374	1.37151e+06	Grey	0.655619
867	SMR	Gas H2	Railcar	Fertilizer	43	10% annual price reduction		50000	0.2			2.12	141514735	1768267757	2.33	0.448	0.648	60000	148251	67.8572	11.6568	159.544	24101950	0	164384	46119385	1.34515e+06	0	1.14014e+07		44833.8	-5.98609e+06	0					FALSE	1.30132e+06	4.21687e+06	1.30132e+06	4.21687e+06	Grey	0
868	SMR	Gas H2	Railcar	FCEV filling	44	10% annual price reduction		50000	0.2			5.71	212766675	712753265	12.17	0.0344	0.14	189000	148253	67.8662	11.657	159.547	43813025	0	50000	15000000	437500	0	3.70827e+06		14581.9	-1.94689e+06	0	300	5000	7.70988e-19	50000	TRUE	423236	1.37151e+06	423236	1.37151e+06	Grey	0.655731
869	SMR	Formic Acid	Pipeline	Fertilizer	45	10% annual price reduction		50000	0.2			2.26	357190563	1369183391	5.58	0.402	0.641	106000	136835	68.646	0.034745	211.535	24728138	0	164384	44966228	1.31151e+06	0	1.02603e+07	-792922	43712.8	-6.69242e+06	0					FALSE	1.45487e+06	4.11144e+06	1.45487e+06	4.11144e+06	Grey	0
870	SMR	Formic Acid	Pipeline	FCEV filling	46	10% annual price reduction		50000	0.2			2.72	1071945905	1153456753	17.17	0.1213	0.514	281000	137354	69.031	0.362905	212.676	139228652	0	50000	15000000	437500	0	3.43565e+06	-271992	14581.9	-2.21951e+06	0	300	5000	7.70988e-19	50000	TRUE	482503	1.37151e+06	482503	1.37151e+06	Grey	0.607523
871	SMR	Formic Acid	Railcar	Fertilizer	47	10% annual price reduction		50000	0.2			2.2	308012953	1481663972	4.83	0.4154	0.653	99000	136820	68.793	0.002288	211.464	24866208	0	164384	45282220	1.32073e+06	0	1.03312e+07	-863199	44020	-6.74063e+06	0					FALSE	1.46535e+06	4.14033e+06	1.46535e+06	4.14033e+06	Grey	0
872	SMR	Formic Acid	Railcar	FCEV filling	48	10% annual price reduction		50000	0.2			2.17	310730930	3930839287	5.5	0.3706	0.591	100000	137191	70.5665	0.023893	211.939	157287216	0	50000	15000000	437500	0	3.43157e+06	-276702	14581.9	-2.22359e+06	0	300	5000	7.70988e-19	50000	TRUE	483389	1.37151e+06	483389	1.37151e+06	Grey	0.606802
873	SMR	Liquid H2	Truck	Fertilizer	49	10% annual price reduction		50000	0.2			3.52	540616353	591560325	10.5	0.2408	0.468	123000	211865	115.351	51.6827	299.28	19509819	0	164384	42918533	1.25179e+06	0	1.51628e+07	4.61291e+06	41722.2	-1.01794e+06	0					FALSE	221291	3.92421e+06	221291	3.92421e+06	Grey	0
874	SMR	Liquid H2	Truck	FCEV filling	50	10% annual price reduction		50000	0.2			3.04	547325018	2406230809	11	0.2154	0.466	185000	216232	121.604	51.8604	304.915	132427596	0	50000	15000000	437500	0	5.40862e+06	1.70098e+06	14581.9	-246539	0	300	5000	7.70988e-19	50000	TRUE	53595.5	1.37151e+06	53595.5	1.37151e+06	Grey	0.956403
875	SMR	Liquid H2	Railcar	Fertilizer	51	10% annual price reduction		50000	0.2			3.49	539252727	603270525	10.42	0.2449	0.472	122000	211406	114.709	51.6641	298.689	19616583	0	164384	42951566	1.25275e+06	0	1.51416e+07	4.52337e+06	41754.3	-1.05155e+06	0					FALSE	228599	3.92723e+06	228599	3.92723e+06	Grey	0
876	SMR	Liquid H2	Railcar	FCEV filling	52	10% annual price reduction		50000	0.2			3	546015937	2442988264	10.92	0.2229	0.476	183000	211444	114.888	51.6662	298.737	133301337	0	50000	15000000	437500	0	5.28886e+06	1.58059e+06	14581.9	-366300	0	300	5000	7.70988e-19	50000	TRUE	79630.3	1.37151e+06	79630.3	1.37151e+06	Grey	0.935225
877	CO Purchase	Methyl Formate	Pipeline	Fertilizer	53	10% annual price reduction		50000	0.2			6.19	258677705	-51247524	19.33	0.0146	0.103	130000	486138	21.0254	13.1026	97.7719	4884641	0	164383	39297746	1.14618e+06	0	3.18569e+07	2.289e+07	38202.3	1.70412e+07	0					FALSE	0	0	-1	-1	Grey	0
878	CO Purchase	Methyl Formate	Pipeline	FCEV filling	54	10% annual price reduction		50000	0.2			9.17	860863708	-1073254956	> 25 years	0	0	N/A	486554	21.3346	13.3662	98.6889	-1830123	0	50000	15000000	437500	0	1.21702e+07	8.73458e+06	14581.9	6.51506e+06	0	300	5000	7.70988e-19	50000	TRUE	0	0	-1	-1	Grey	0
879	CO Purchase	Methyl Formate	Railcar	Fertilizer	55	10% annual price reduction		50000	0.2			6.13	209446239	47567076	14.67	0.0297	0.112	126000	486133	21.1807	13.077	97.7251	5104030	0	164384	41374068	1.20674e+06	0	3.35397e+07	2.41001e+07	40220.8	1.79412e+07	0					FALSE	0	0	0	0	Grey	0
880	CO Purchase	Methyl Formate	Railcar	FCEV filling	56	10% annual price reduction		50000	0.2			6.12	217284276	245094492	16.67	0	0.098	244000	486505	22.9563	13.0987	98.2002	29014038	0	50000	15000000	437500	0	1.2169e+07	8.73741e+06	14581.9	6.51382e+06	0	300	5000	7.70988e-19	50000	TRUE	0	0	0	0	Grey	0
881	CO Purchase	Formic Acid	Pipeline	Fertilizer	57	10% annual price reduction		50000	0.2			4.92	255123898	452501059	8.25	0.1476	0.278	115000	390830	21.0335	13.1094	97.7956	11164530	0	164384	43931995	1.28135e+06	0	2.86315e+07	1.86072e+07	42707.4	1.20687e+07	0					FALSE	0	0	0	0	Grey	0
882	CO Purchase	Formic Acid	Pipeline	FCEV filling	58	10% annual price reduction		50000	0.2			8.31	969872618	-986781447	>25 years	0	0	N/A	391348	21.4184	13.4375	98.9374	-302291	0	50000	15000000	437500	0	9.78883e+06	6.35318e+06	14581.9	4.13367e+06	0	300	5000	7.70988e-19	50000	TRUE	0	0	-1	-1	Grey	0
883	CO Purchase	Formic Acid	Railcar	Fertilizer	59	10% annual price reduction		50000	0.2			4.86	205946288	561554608	6.5	0.161	0.284	106000	390814	21.1805	13.0769	97.725	11302600	0	164384	44692383	1.30353e+06	0	2.91259e+07	1.89293e+07	43446.6	1.22764e+07	0					FALSE	0	0	0	0	Grey	0
884	CO Purchase	Formic Acid	Railcar	FCEV filling	60	10% annual price reduction		50000	0.2			4.99	208657643	1447303504	8.08	0.1163	0.234	134000	391185	22.9539	13.0985	98.1997	66304030	0	50000	15000000	437500	0	9.78476e+06	6.35318e+06	14581.9	4.1296e+06	0	300	5000	7.70988e-19	50000	TRUE	0	0	0	0	Grey	0
885	CO Purchase	Methanol	Pipeline	Fertilizer	61	10% annual price reduction		50000	0.2			5.89	659981575	-430900968	>25 years	0	0.138	139000	386846	2.7198	3.83784	0.07848	8169266	0	164381	34745983	1.01342e+06	0	2.24139e+07	1.44857e+07	33777.4	9.31434e+06	0					FALSE	0	0	-1	-1	Grey	0
886	CO Purchase	Methanol	Pipeline	FCEV filling	62	10% annual price reduction		50000	0.2			9.71	1.26296e+09	-1447461391	> 25 years	0	0	N/A	387182	2.9697	4.05102	0.819711	-1563539	0		#DIV/0!	#DIV/0!	#DIV/0!	#DIV/0!	#DIV/0!	#DIV/0!	#DIV/0!	0	#DIV/0!	#NUM!	#NUM!	0	TRUE	#DIV/0!	#DIV/0!	-1	-1	Grey	#DIV/0!
887	CO Purchase	Methanol	Railcar	Fertilizer	63	10% annual price reduction		50000	0.2			5.83	610621727	-344442403	>25 years	0	0.146	140000	386849	2.88134	3.81755	0.050325	8458538	0	164383	36135977	1.05397e+06	0	2.33108e+07	1.50663e+07	35128.7	9.68718e+06	0					FALSE	0	0	-1	-1	Grey	0
888	CO Purchase	Methanol	Railcar	FCEV filling	64	10% annual price reduction		50000	0.2			5.27	618665692	-23012046	21.92	0	0.195	295000	387221	4.65691	3.83916	0.525644	53732986	0	50000	15000000	437500	0	9.6856e+06	6.25403e+06	14581.9	4.03044e+06	0	300	5000	7.70988e-19	50000	TRUE	0	0	-1	-1	Grey	0
889	Biomass Gasification	Gas H2	Pipeline	Fertilizer	1		0	50000	0.2			1.46	331230897	1709398149	4.83	0.4898	0.757	102000	622705	20.975	9.54937	63.4985	28576684	0	164384	45229599	1.3192e+06	0	4.69657e+07	3.58477e+07	43968.8	2.99137e+07	0					FALSE	0	0	0	0	Grey	0
890	Biomass Gasification	Gas H2	Pipeline	FCEV filling	2		0	50000	0.2			2.11	930706298	1539743151	17.67	0.2503	0.632	322000	623523	21.5821	10.067	65.2992	163299334	0	50000	15000000	437500	0	1.55962e+07	1.18886e+07	14581.9	9.94107e+06	0	300	5000	7.70988e-19	50000	TRUE	0	0	0	0	Grey	0
891	Biomass Gasification	Gas H2	Railcar	Fertilizer	3		0	50000	0.2			1.87	296576474	1617802472	4.67	0.4521	0.701	978000	623546	20.2447	18.1117	45.8055	26575686	0	164384	45349007	1.32268e+06	0	4.71533e+07	3.59424e+07	44084.9	3.00563e+07	0					FALSE	0	0	0	0	Grey	0
892	Biomass Gasification	Gas H2	Railcar	FCEV filling	4		0	50000	0.2			5.34	367828413	425412337	19.42	0.0383	0.205	340000	623548	20.2537	18.1118	45.8077	59229347	0		#DIV/0!	#DIV/0!	#DIV/0!	#DIV/0!	#DIV/0!	#DIV/0!	#DIV/0!	0	#DIV/0!	#NUM!	#NUM!	0	TRUE	#DIV/0!	#DIV/0!	#DIV/0!	#DIV/0!	Grey	#DIV/0!
893	Biomass Gasification	Formic Acid	Pipeline	Fertilizer	5		0	50000	0.2			2.18	555494056	1063450848	8.75	0.3848	0.662	123000	612130	21.0335	13.1094	97.7956	26814983	0	164384	43592675	1.27145e+06	0	4.44973e+07	3.45504e+07	42377.5	2.80624e+07	0					FALSE	0	0	0	0	Grey	0
894	Biomass Gasification	Formic Acid	Pipeline	FCEV filling	6		0	50000	0.2			2.64	1270273890	-53124820	24.83	0.1041	0.574	445000	612649	21.4184	13.4375	98.9374	128380133	0	50000	15000000	437500	0	1.53242e+07	1.18886e+07	14581.9	9.66908e+06	0	300	5000	7.70988e-19	50000	TRUE	0	0	-1	-1	Grey	0
895	Biomass Gasification	Formic Acid	Railcar	Fertilizer	7		0	50000	0.2			2.11	506316446	1178787932	7.92	0.3982	0.667	121000	612114	21.1805	13.0769	97.725	26953053	0	164384	43960538	1.28218e+06	0	4.48716e+07	3.48419e+07	42735.1	2.8298e+07	0					FALSE	0	0	0	0	Grey	0
896	Biomass Gasification	Formic Acid	Railcar	FCEV filling	8		0	50000	0.2			1.94	509058915	3439965511	9.5	0.3535	0.632	170000	612486	22.9539	13.0985	98.1997	173674085	0	50000	15000000	437500	0	1.53202e+07	1.18886e+07	14581.9	9.665e+06	0	300	5000	7.70988e-19	50000	TRUE	0	0	0	0	Grey	0
897	Biomass Gasification	Liquid H2	Truck	Fertilizer	9		0	50000	0.2			3.31	695678091	394771696	13.75	0.2449	0.502	133000	687159	67.7389	58.1375	185.542	21983548	0	164384	41504277	1.21054e+06	0	4.75583e+07	3.28952e+07	40347.3	3.19108e+07	0					FALSE	0	0	0	0	Grey	0
898	Biomass Gasification	Liquid H2	Truck	FCEV filling	10		0	50000	0.2			2.78	702386757	1839563465	15.58	0.2195	0.532	282000	691526	73.9912	58.3152	191.176	148533174	0	50000	15000000	437500	0	1.72972e+07	1.18886e+07	14581.9	1.1642e+07	0	300	5000	7.70988e-19	50000	TRUE	0	0	0	0	Grey	0
899	Biomass Gasification	Liquid H2	Railcar	Fertilizer	11		0	50000	0.2			3.28	694314465	406798007	13.67	0.249	0.509	133000	686701	67.0959	58.119	184.95	22090312	0	164384	41545538	1.21174e+06	0	4.75738e+07	3.29279e+07	40387.5	3.19107e+07	0					FALSE	0	0	0	0	Grey	0
900	Biomass Gasification	Liquid H2	Railcar	FCEV filling	12		0	50000	0.2			2.73	701077676	1882610945	15.42	0.227	0.54	281000	686738	67.2754	58.1211	184.998	149484236	0	50000	15000000	437500	0	1.71775e+07	1.18886e+07	14581.9	1.15223e+07	0	300	5000	7.70988e-19	50000	TRUE	0	0	0	0	Grey	0
901	CO2 Electrolysis PV Coupled	Methyl Formate	Pipeline	Fertilizer	13		0	50000	0.2			2.61	396903706	1160993301	6.92	0.3628	0.6	113000	102307	14.4514	6.64772	92.5141	23780422	68.5	164384	44430479	1.29589e+06	17753.7	7.57991e+06	-2.55816e+06	43192	-9.17085e+06	225.206					FALSE	1.99366e+06	4.06245e+06	1.99366e+06	4.06245e+06	Grey	0
902	CO2 Electrolysis PV Coupled	Methyl Formate	Pipeline	FCEV filling	14		0	50000	0.2			3.02	999035087	437155236	22.08	0.1342	0.52	394000	102724	14.7605	6.91136	93.4312	126188211	68.5	50000	15000000	437500	5993.75	2.56944e+06	-866203	14581.9	-3.08572e+06	68.5	300	5000	7.70988e-19	50000	TRUE	670808	1.37151e+06	670808	1.37151e+06	Grey	0.454353
903	CO2 Electrolysis PV Coupled	Methyl Formate	Railcar	Fertilizer	15		0	50000	0.2			2.52	347670026	1288435156	6	0.3781	0.611	107000	102303	14.6067	6.62211	92.4673	24007085	68.5	164384	44828902	1.30751e+06	17912.9	7.64752e+06	-2.5803e+06	43579.3	-9.25345e+06	225.206					FALSE	2.01162e+06	4.09888e+06	2.01162e+06	4.09888e+06	Grey	0
904	CO2 Electrolysis PV Coupled	Methyl Formate	Railcar	FCEV filling	16		0	50000	0.2			2.36	355539057	3564021945	7	0.346	0.575	121000	102674	16.3822	6.64386	92.9425	156882386	68.5	50000	15000000	437500	5993.75	2.5682e+06	-863369	14581.9	-3.08696e+06	68.5	300	5000	7.70988e-19	50000	TRUE	671078	1.37151e+06	671078	1.37151e+06	Grey	0.454133
905	CO2 Electrolysis PV Coupled	Formic Acid	Pipeline	Fertilizer	17		0	50000	0.2			2.08	635014622	1093998092	9.08	0.3721	0.665	123000	6999.5	14.4594	6.65455	92.5379	28270721	273.9	164384	43759182	1.27631e+06	69916.2	510755	-9.47415e+06	42539.4	-1.59869e+07	900.496					FALSE	3.47542e+06	4.00107e+06	3.47542e+06	4.00107e+06	Green	0
906	CO2 Electrolysis PV Coupled	Formic Acid	Pipeline	FCEV filling	18		0	50000	0.2			2.4	1349788632	87534490	24.08	0.0913	0.598	424000	7518.03	14.8444	6.98271	93.6797	144410621	273.9	50000	15000000	437500	23966.2	188049	-3.2476e+06	14581.9	-5.46711e+06	273.9	300	5000	7.70988e-19	50000	TRUE	1.1885e+06	1.37151e+06	1.1885e+06	1.37151e+06	Green	0.0332526
907	CO2 Electrolysis PV Coupled	Formic Acid	Railcar	Fertilizer	19		0	50000	0.2			2	585832881	1212249457	8.25	0.3858	0.678	117000	6983.9	14.6064	6.62209	92.4673	28422372	273.9	164384	44104967	1.28639e+06	70468.7	513643	-9.54901e+06	42875.5	-1.61144e+07	900.496					FALSE	3.50313e+06	4.03269e+06	3.50313e+06	4.03269e+06	Green	0
908	CO2 Electrolysis PV Coupled	Formic Acid	Railcar	FCEV filling	20		0	50000	0.2			1.68	588569425	3681825253	9.5	0.342	0.649	164000	7355.12	16.3799	6.6437	92.942	184867592	273.9	50000	15000000	437500	23966.2	183974	-3.2476e+06	14581.9	-5.47119e+06	273.9	300	5000	7.70988e-19	50000	TRUE	1.18939e+06	1.37151e+06	1.18939e+06	1.37151e+06	Green	0.0325321
909	CO2 Electrolysis PV Coupled	Methanol	Pipeline	Fertilizer	21		0	50000	0.2			3.25	1039096894	41246625	18.83	0.1838	0.506	138000	3015.23	0.026458	0.022571	0.07848	25267862	273.9	164383	40166585	1.17153e+06	64176.2	201958	-8.96319e+06	39046.9	-1.49413e+07	900.49					FALSE	3.2481e+06	3.67259e+06	3.2481e+06	3.67259e+06	Green	0
910	CO2 Electrolysis PV Coupled	Methanol	Pipeline	FCEV filling	22		0	50000	0.2			3.02	1642023228	-1029886177	>25 years	0	0.547	513000	3351.86	0.276356	0.235755	0.819711	91217843	273.9	50000	15000000	437500	23966.2	83840.4	-3.3518e+06	14581.9	-5.57132e+06	273.9	300	5000	7.70988e-19	50000	TRUE	1.21116e+06	1.37151e+06	-1	-1	Green	0.0148254
911	CO2 Electrolysis PV Coupled	Methanol	Railcar	Fertilizer	23		0	50000	0.2			3.16	989735965	153256968	17.58	0.2005	0.518	139000	3018.95	0.187993	0.002288	0.050325	25560536	273.9	164383	40640506	1.18535e+06	64933.4	204593	-9.06764e+06	39507.7	-1.51173e+07	900.49					FALSE	3.28637e+06	3.71592e+06	3.28637e+06	3.71592e+06	Green	0
912	CO2 Electrolysis PV Coupled	Methanol	Railcar	FCEV filling	24		0	50000	0.2			2.18	997810875	1639626975	18	0.1812	0.598	523000	3390.78	1.96356	0.023893	0.525644	174542298	273.9	50000	15000000	437500	23966.2	84813.9	-3.34676e+06	14581.9	-5.57035e+06	273.9	300	5000	7.70988e-19	50000	TRUE	1.21094e+06	1.37151e+06	1.21094e+06	1.37151e+06	Green	0.0149976
913	N2 Electrolysis PV Coupled	Ammonia	Pipeline	Fertilizer	25		0	50000	0.2			1.25	373894853	1834919341	4.67	0.4952	0.777	95000	29.2259	0.021691	0.018492	0.064338	30261311	249.5	164384	45459444	1.3259e+06	66162.4	2215.48	-1.03706e+07	44192.3	-1.71365e+07	820.276					FALSE	3.72532e+06	4.15653e+06	3.72532e+06	4.15653e+06	Green	0
914	N2 Electrolysis PV Coupled	Ammonia	Pipeline	FCEV filling	26		0	50000	0.2			2.26	1274545136	429488740	22.67	0.1268	0.61	411000	305.261	0.226565	0.193148	0.672009	153795002	249.5	50000	15000000	437500	21831.2	7635.53	-3.42801e+06	14581.9	-5.64752e+06	249.5	300	5000	7.70988e-19	50000	TRUE	1.22772e+06	1.37151e+06	1.22772e+06	1.37151e+06	Green	0.00135018
915	N2 Electrolysis PV Coupled	Ammonia	Railcar	Fertilizer	27		0	50000	0.2			1.14	325288747	1966838347	4	0.5118	0.782	88000	8.94212	0.042679	0.000528	0.011422	30560804	249.5	164384	45704042	1.33303e+06	66518.4	681.509	-1.04268e+07	44430	-1.72302e+07	820.276					FALSE	3.7457e+06	4.1789e+06	3.7457e+06	4.1789e+06	Green	0
916	N2 Electrolysis PV Coupled	Ammonia	Railcar	FCEV filling	28		0	50000	0.2			1.45	634039896	3750547047	10	0.3549	0.679	170000	93.3996	0.445778	0.005514	0.119297	193719553	249.5	50000	15000000	437500	21831.2	2336.21	-3.42923e+06	14581.9	-5.65282e+06	249.5	300	5000	7.70988e-19	50000	TRUE	1.22887e+06	1.37151e+06	1.22887e+06	1.37151e+06	Green	0.000413111
917	H2O electrolysis PV Coupled	Gas H2	Pipeline	Fertilizer	29		0	50000	0.2			1.29	383044329	1803865630	4.83	0.4894	0.772	96.6	17574.2	14.401	3.09453	58.2408	30142976	249.5	164384	45407094	1.32437e+06	66086.2	1.33068e+06	-9.83093e+06	44141.4	-1.57883e+07	820.276					FALSE	3.43223e+06	4.15175e+06	3.43223e+06	4.15175e+06	Green	0
918	H2O electrolysis PV Coupled	Gas H2	Pipeline	FCEV filling	30		0	50000	0.2			1.73	982345869	1990489563	16.42	0.2619	0.671	288000	18392	15.0081	3.61215	60.0415	181105085	249.5	50000	15000000	437500	21831.2	460039	-3.2476e+06	14581.9	-5.19512e+06	249.5	300	5000	7.70988e-19	50000	TRUE	1.12937e+06	1.37151e+06	1.12937e+06	1.37151e+06	Green	0.0813485
919	H2O electrolysis PV Coupled	Gas H2	Railcar	Fertilizer	31		0	50000	0.2			1.61	348266778	1746494737	4.58	0.4604	0.724	92900	18415.5	13.6706	11.6568	40.5477	28546782	249.5	164384	45517697	1.3276e+06	66247.2	1.39779e+06	-9.85487e+06	44248.9	-1.57629e+07	820.276					FALSE	3.42671e+06	4.16186e+06	3.42671e+06	4.16186e+06	Green	0
920	H2O electrolysis PV Coupled	Gas H2	Railcar	FCEV filling	32		0	50000	0.2			4.92	419467985	918837100	15.75	0.0513	0.242	257000	18417.4	13.6797	11.657	40.55	76782282	249.5	50000	15000000	437500	21831.2	460676	-3.2476e+06	14581.9	-5.19448e+06	249.5	300	5000	7.70988e-19	50000	TRUE	1.12924e+06	1.37151e+06	1.12924e+06	1.37151e+06	Green	0.0814611
921	H2O electrolysis PV Coupled	Formic Acid	Pipeline	Fertilizer	33		0	50000	0.2			2.84	565499385	886653357	9.42	0.3061	0.565	123000	146211	14.4594	6.65455	92.5379	24054792	249.5	164384	43632665	1.27262e+06	63503.7	1.06382e+07	682176	42416.4	-5.81177e+06	820.276					FALSE	1.26343e+06	3.9895e+06	1.26343e+06	3.9895e+06	Grey	0
922	H2O electrolysis PV Coupled	Formic Acid	Pipeline	FCEV filling	34		0	50000	0.2			3.25	1280242431	-421349031	>25 years	0.0254	0.5	477000	146730	14.8444	6.98271	93.6797	104636770	249.5	50000	15000000	437500	21831.2	3.67016e+06	234518	14581.9	-1.985e+06	249.5	300	5000	7.70988e-19	50000	TRUE	431521	1.37151e+06	-1	-1	Grey	0.648992
923	H2O electrolysis PV Coupled	Formic Acid	Railcar	Fertilizer	35		0	50000	0.2			2.76	516317644	1004755368	8.5	0.3199	0.573	118000	146196	14.6064	6.62209	92.4673	24206443	249.5	164384	44042637	1.28458e+06	64100.4	1.0737e+07	688585	42814.9	-5.86752e+06	820.276					FALSE	1.27555e+06	4.02699e+06	1.27555e+06	4.02699e+06	Grey	0
924	H2O electrolysis PV Coupled	Formic Acid	Railcar	FCEV filling	36		0	50000	0.2			2.53	519023224	3039981227	9.92	0.276	0.537	171000	146567	16.3799	6.6437	92.942	156048395	249.5	50000	15000000	437500	21831.2	3.66609e+06	234518	14581.9	-1.98907e+06	249.5	300	5000	7.70988e-19	50000	TRUE	432407	1.37151e+06	432407	1.37151e+06	Grey	0.648272
925	H2O electrolysis PV Coupled	Liquid H2	Truck	Fertilizer	37		0	50000	0.2			2.4	746364376	771537873	11.42	0.3222	0.62	130000	82028.8	61.1648	51.6827	180.284	27255535	249.5	164384	42778677	1.24771e+06	62260.8	5.85153e+06	-9.26186e+06	41586.2	-1.02765e+07	820.276					FALSE	2.23402e+06	3.91142e+06	2.23402e+06	3.91142e+06	Grey	0
926	H2O electrolysis PV Coupled	Liquid H2	Truck	FCEV filling	38		0	50000	0.2			1.74	753073042	2990931658	12.67	0.2968	0.644	238000	86395.7	67.4171	51.8604	185.918	185979526	249.5	50000	15000000	437500	21831.2	2.16102e+06	-3.2476e+06	14581.9	-3.49414e+06	249.5	300	5000	7.70988e-19	50000	TRUE	759595	1.37151e+06	759595	1.37151e+06	Grey	0.382132
927	H2O electrolysis PV Coupled	Liquid H2	Railcar	Fertilizer	39		0	50000	0.2			2.36	745000750	783900178	11.33	0.3262	0.62	130000	81570.4	60.5219	51.6641	179.692	27362299	249.5	164384	42806089	1.24851e+06	62300.7	5.82256e+06	-9.2678e+06	41612.9	-1.03158e+07	820.276					FALSE	2.24256e+06	3.91393e+06	2.24256e+06	3.91393e+06	Grey	0
928	H2O electrolysis PV Coupled	Liquid H2	Railcar	FCEV filling	40		0	50000	0.2			1.7	751763960	3032768652	12.58	0.3043	0.649	219000	81607.8	60.7013	51.6662	179.74	186868813	249.5	50000	15000000	437500	21831.2	2.04126e+06	-3.2476e+06	14581.9	-3.6139e+06	249.5	300	5000	7.70988e-19	50000	TRUE	785630	1.37151e+06	785630	1.37151e+06	Grey	0.360955
929	SMR	Gas H2	Pipeline	Fertilizer	41		0	50000	0.2			1.13	175304478	2091724116	2.67	0.5456	0.803	78000	147410	68.5876	3.09453	177.238	28945734	0	164384	46056942	1.34333e+06	0	1.13214e+07		44773.1	-6.0426e+06	0					FALSE	1.31361e+06	4.21116e+06	1.31361e+06	4.21116e+06	Grey	0
930	SMR	Gas H2	Pipeline	FCEV filling	42		0	50000	0.2			1.89	774656750	2342536799	14.33	0.3148	0.654	278000	148228	69.1946	3.61215	179.038	170969867	0	50000	15000000	437500	0	3.70764e+06		14581.9	-1.94752e+06	0	300	5000	7.70988e-19	50000	TRUE	423374	1.37151e+06	423374	1.37151e+06	Grey	0.655619
931	SMR	Gas H2	Railcar	Fertilizer	43		0	50000	0.2			1.45	140526926	2030989881	2.17	0.5166	0.74	61200	148251	67.8572	11.6568	159.544	27349540	0	164384	46142112	1.34581e+06	0	1.1407e+07		44855.9	-5.98904e+06	0					FALSE	1.30197e+06	4.21895e+06	1.30197e+06	4.21895e+06	Grey	0
932	SMR	Gas H2	Railcar	FCEV filling	44		0	50000	0.2			5.12	211778866	1263341924	9.83	0.103	0.218	175000	148253	67.8662	11.657	159.547	65377621	0	50000	15000000	437500	0	3.70827e+06		14581.9	-1.94689e+06	0	300	5000	7.70988e-19	50000	TRUE	423236	1.37151e+06	423236	1.37151e+06	Grey	0.655731
933	SMR	Formic Acid	Pipeline	Fertilizer	45		0	50000	0.2			1.62	356202755	1599418778	5.25	0.4706	0.738	105000	136835	68.646	0.034745	211.535	27975728	0	164384	45059532	1.31424e+06	0	1.02816e+07	-794567	43803.5	-6.70631e+06	0					FALSE	1.45789e+06	4.11997e+06	1.45789e+06	4.11997e+06	Grey	0
934	SMR	Formic Acid	Pipeline	FCEV filling	46		0	50000	0.2			2.33	1070958097	817657145	20.75	0.1899	0.598	395000	137354	69.031	0.362905	212.676	151513788	0	50000	15000000	437500	0	3.43565e+06	-271992	14581.9	-2.21951e+06	0	300	5000	7.70988e-19	50000	TRUE	482503	1.37151e+06	482503	1.37151e+06	Grey	0.607523
935	SMR	Formic Acid	Railcar	Fertilizer	47		0	50000	0.2			1.55	307025145	1721702366	4.58	0.484	0.747	98700	136820	68.793	0.002288	211.464	28113798	0	164384	45369429	1.32328e+06	0	1.03511e+07	-864861	44104.8	-6.75361e+06	0					FALSE	1.46818e+06	4.1483e+06	1.46818e+06	4.1483e+06	Grey	0
936	SMR	Formic Acid	Railcar	FCEV filling	48		0	50000	0.2			1.59	309743122	4408088738	5.25	0.4393	0.681	101000	137191	70.5665	0.023893	211.939	178696790	0	50000	15000000	437500	0	3.43157e+06	-276702	14581.9	-2.22359e+06	0	300	5000	7.70988e-19	50000	TRUE	483389	1.37151e+06	483389	1.37151e+06	Grey	0.606802
937	SMR	Liquid H2	Truck	Fertilizer	49		0	50000	0.2			2.93	539628544	770673023	9.92	0.3094	0.557	128000	211865	115.351	51.6827	299.28	22757408	0	164384	43053821	1.25574e+06	0	1.52106e+07	4.62745e+06	41853.7	-1.02115e+06	0					FALSE	221989	3.93658e+06	221989	3.93658e+06	Grey	0
938	SMR	Liquid H2	Truck	FCEV filling	50		0	50000	0.2			2.55	546337210	2658861484	11.58	0.284	0.551	217000	216232	121.604	51.8604	304.915	153672403	0	50000	15000000	437500	0	5.40862e+06	1.70098e+06	14581.9	-246539	0	300	5000	7.70988e-19	50000	TRUE	53595.5	1.37151e+06	53595.5	1.37151e+06	Grey	0.956403
939	SMR	Liquid H2	Railcar	Fertilizer	51		0	50000	0.2			2.9	538264918	783088134	9.83	0.3135	0.561	126000	211406	114.709	51.6641	298.689	22864172	0	164384	43086063	1.25668e+06	0	1.51891e+07	4.53753e+06	41885	-1.05485e+06	0					FALSE	229315	3.93953e+06	229315	3.93953e+06	Grey	0
940	SMR	Liquid H2	Railcar	FCEV filling	52		0	50000	0.2			2.5	545028128	2701199282	11.42	0.2915	0.561	215000	211444	114.888	51.6662	298.737	154553390	0	50000	15000000	437500	0	5.28886e+06	1.58059e+06	14581.9	-366300	0	300	5000	7.70988e-19	50000	TRUE	79630.3	1.37151e+06	79630.3	1.37151e+06	Grey	0.935225
941	CO Purchase	Methyl Formate	Pipeline	Fertilizer	53		0	50000	0.2			2.11	252611183	1572818733	4.25	0.436	0.667	93000	486138	21.0254	13.1026	97.7719	24829381	0	164384	45528354	1.32791e+06	0	3.69077e+07	2.65191e+07	44259.3	1.97431e+07	0					FALSE	0	0	0	0	Grey	0
942	CO Purchase	Methyl Formate	Pipeline	FCEV filling	54		0	50000	0.2			2.78	854797186	1116789692	18.58	0.202	0.547	341000	486554	21.3346	13.3662	98.6889	138477919	0		#DIV/0!	#DIV/0!	#DIV/0!	#DIV/0!	#DIV/0!	#DIV/0!	#DIV/0!	0	#DIV/0!	#NUM!	#NUM!	0	TRUE	#DIV/0!	#DIV/0!	#DIV/0!	#DIV/0!	Grey	#DIV/0!
943	CO Purchase	Methyl Formate	Railcar	Fertilizer	55		0	50000	0.2			2.02	203379717	1702321565	3.33	0.4511	0.674	84300	486133	21.1807	13.077	97.7251	25048763	0	164384	45836046	1.33688e+06	0	3.71568e+07	2.66992e+07	44558.4	1.98761e+07	0					FALSE	0	0	0	0	Grey	0
944	CO Purchase	Methyl Formate	Railcar	FCEV filling	56		0	50000	0.2			2.03	211217754	4259276993	3.75	0.419	0.619	68000	486505	22.9563	13.0987	98.2002	161701093	0	50000	15000000	437500	0	1.2169e+07	8.73741e+06	14581.9	6.51382e+06	0	300	5000	7.70988e-19	50000	TRUE	0	0	0	0	Grey	0
945	CO Purchase	Formic Acid	Pipeline	Fertilizer	57		0	50000	0.2			0.8	249057376	2107816984	3.33	0.569	0.848	82500	390830	21.0335	13.1094	97.7956	31109261	0	164384	45799626	1.33582e+06	0	2.98487e+07	1.93982e+07	44523	1.25818e+07	0					FALSE	0	0	0	0	Grey	0
946	CO Purchase	Formic Acid	Pipeline	FCEV filling	58		0	50000	0.2			1.65	963806096	1881226888	16.92	0.2885	0.689	320000	391348	21.4184	13.4375	98.9374	179745891	0		#DIV/0!	#DIV/0!	#DIV/0!	#DIV/0!	#DIV/0!	#DIV/0!	#DIV/0!	0	#DIV/0!	#NUM!	#NUM!	0	TRUE	#DIV/0!	#DIV/0!	#DIV/0!	#DIV/0!	Grey	#DIV/0!
947	CO Purchase	Formic Acid	Railcar	Fertilizer	59		0	50000	0.2			0.72	199879766	2228322391	2.75	0.5824	0.853	72800	390814	21.1805	13.0769	97.725	31247330	0	164384	46006373	1.34185e+06	0	2.99823e+07	1.94858e+07	44723.9	1.26374e+07	0					FALSE	0	0	0	0	Grey	0
948	CO Purchase	Formic Acid	Railcar	FCEV filling	60		0	50000	0.2			0.88	202591120	5387545233	3	0.5377	0.783	65100	391185	22.9539	13.0985	98.1997	197821630	0		#DIV/0!	#DIV/0!	#DIV/0!	#DIV/0!	#DIV/0!	#DIV/0!	#DIV/0!	0	#DIV/0!	#NUM!	#NUM!	0	TRUE	#DIV/0!	#DIV/0!	#DIV/0!	#DIV/0!	Grey	#DIV/0!
949	CO Purchase	Methanol	Pipeline	Fertilizer	61		0	50000	0.2			2.05	653915052	962905898	10	0.3813	0.667	128000	386846	2.7198	3.83784	0.07848	28114284	0	164384	43085209	1.25665e+06	0	2.77934e+07	1.79623e+07	41884.2	1.15498e+07	0					FALSE	0	0	0	0	Grey	0
950	CO Purchase	Methanol	Pipeline	FCEV filling	62		0	50000	0.2			2.25	1256896033	321629011	23.17	0.1468	0.622	423000	387182	2.9697	4.05102	0.819711	148097166	0		#DIV/0!	#DIV/0!	#DIV/0!	#DIV/0!	#DIV/0!	#DIV/0!	#DIV/0!	0	#DIV/0!	#NUM!	#NUM!	0	TRUE	#DIV/0!	#DIV/0!	#DIV/0!	#DIV/0!	Grey	#DIV/0!
951	CO Purchase	Methanol	Railcar	Fertilizer	63		0	50000	0.2			1.96	604555205	1088178718	9.17	0.3979	0.691	124000	386849	2.88134	3.81755	0.050325	28403394	0	164384	43464168	1.2677e+06	0	2.80381e+07	1.81217e+07	42252.6	1.16517e+07	0					FALSE	0	0	0	0	Grey	0
952	CO Purchase	Methanol	Railcar	FCEV filling	64		0	50000	0.2			1.42	612599169	3618592311	10.5	0.3786	0.701	186000	387221	4.65691	3.83916	0.525644	193222494	0	50000	15000000	437500	0	9.6856e+06	6.25403e+06	14581.9	4.03044e+06	0	300	5000	7.70988e-19	50000	TRUE	0	0	0	0	Grey	0

## Sheet: Poll Data
		Last Updated: 4/21/22 3:20 pm					Grand total	2370
		California - Orange County					California - Santa Cruz
		Question	Count				Question	Count
		This matters to me and I support it	180				This matters to me and I support it	131
		This does not matter to me, but I support it	138				This does not matter to me, but I support it	76
		This matters to me and I oppose it	21				This matters to me and I oppose it	14
		This does not matter to me, but I oppose it	14				This does not matter to me, but I oppose it	6
		I am completely indifferent	121				I am completely indifferent	82
			474					309
		Texas - Aransas					Texas - Chambers
		Question	Count				Question	Count
		This matters to me and I support it	85				This matters to me and I support it	78
		This does not matter to me, but I support it	63				This does not matter to me, but I support it	93
		This matters to me and I oppose it	12				This matters to me and I oppose it	6
		This does not matter to me, but I oppose it	4				This does not matter to me, but I oppose it	3
		I am completely indifferent	51				I am completely indifferent	92
			215					272
		Florida - Manatee					Florida - Volusia
		Question	Count				Question	Count
		This matters to me and I support it	90				This matters to me and I support it	46
		This does not matter to me, but I support it	47				This does not matter to me, but I support it	44
		This matters to me and I oppose it	6				This matters to me and I oppose it	2
		This does not matter to me, but I oppose it	1				This does not matter to me, but I oppose it	2
		I am completely indifferent	39				I am completely indifferent	28
			183					122
		New York - Delaware					New York - Wayne
		Question	Count				Question	Count
		This matters to me and I support it	102				This matters to me and I support it	206
		This does not matter to me, but I support it	90				This does not matter to me, but I support it	157
		This matters to me and I oppose it	8				This matters to me and I oppose it	19
		This does not matter to me, but I oppose it	9				This does not matter to me, but I oppose it	12
		I am completely indifferent	94				I am completely indifferent	98
			303					492
