# Supplementary material for: Nurturing the blossoming hydrogen economy using HBAT: modelling every link in the H2 supply chain
Source: Royal Society of Chemistry journal article supplement (doi:10.1039/d3ee02789a), 2024-01-01
Supplement: d3ee02789a2.pdf [file d3ee02789a2.pdf]

## Supplemental Information

### Nurturing the Blossoming Hydrogen Economy Using HBAT: Modelling Every Link in the H<sub>2</sub> Supply Chain

Nicolas Alfonso Vargas,<sup>a,§</sup> Moon Jung Kim,<sup>b,§</sup> Carlos D. Alfonso Vargas,<sup>c</sup> Daniel F. Alfonso,<sup>d</sup> and Justin T. Evans<sup>c</sup>

- a Department of Chemistry, University of Southern California, Los Angeles, CA 90007, USA. Corresponding author. Email: [nalfonso@usc.edu](mailto:nalfonso@usc.edu)
- b Department of Chemistry, University of Southern California, Los Angeles, CA 90007, USA. Email: [moonjung@usc.edu](mailto:moonjung@usc.edu)
- c University of Central Florida, Orlando, FL 32816, USA
- d University of South Florida, Tampa, FL 33620, USA
- § Co-first authors with equal contributions.

#### Table of Contents:

- I. Economic constants and assumptions
- II. Supply chain specification table
- III. Supplementary analysis
- IV. Supplemental figures
- V. Data sources and references

## I. Economic constants and assumptions

HBAT's algorithm has many layers of calculations operating in parallel to produce results. Most of the specific calculations can be seen by downloading the newest version of HBAT and checking the cell equations. Equations 1 through 39 are shown in the main text, but supplementary equations and constants are shown in the following section. Unless otherwise noted, fluid properties were calculated using default user parameters at the equivalent rate of 50,000 kg H<sub>2</sub>/day.

Table S1.

| Constant                         | Value                       | Units                             | Equation |
|----------------------------------|-----------------------------|-----------------------------------|----------|
| A <sub>1</sub>                   | 0.2016                      | -                                 | 1        |
| A <sub>2</sub>                   | 1.9608                      | -                                 | 1        |
| A <sub>3</sub>                   | 10000                       | hr kg <sup>-1</sup>               | 1        |
| A <sub>4</sub>                   | 0.961                       | -                                 | 1        |
| A <sub>5</sub>                   | 19.916                      | -                                 | 1        |
| B <sub>1</sub>                   | -1.3028 x 10 <sup>-12</sup> | K <sup>-3</sup> psi <sup>-1</sup> | 3        |
| B <sub>2</sub>                   | 1.4 x 10 <sup>-13</sup>     | K <sup>-3</sup>                   | 3        |
| B <sub>3</sub>                   | 1.6873 x 10 <sup>-9</sup>   | K <sup>-2</sup> psi <sup>-1</sup> | 3        |
| B <sub>4</sub>                   | -1 x 10 <sup>-10</sup>      | K <sup>-2</sup>                   | 3        |
| B <sub>5</sub>                   | -8.1388 x 10 <sup>-7</sup>  | K <sup>-1</sup> psi <sup>-1</sup> | 3        |
| B <sub>6</sub>                   | 4 x 10 <sup>-8</sup>        | K <sup>-1</sup>                   | 3        |
| B <sub>7</sub>                   | 1.732 x 10 <sup>-4</sup>    | psi <sup>-1</sup>                 | 3        |
| B <sub>8</sub>                   | 1.0001                      | -                                 | 3        |
| C <sub>1</sub>                   | 63027                       | USD                               | 4        |
| C <sub>2</sub>                   | 0.0697                      | in <sup>-1</sup>                  | 4        |
| C <sub>3</sub>                   | 251.737                     | USD in <sup>-2</sup>              | 4        |
| C <sub>4</sub>                   | 60848.1                     | USD in <sup>-1</sup>              | 4        |
| C <sub>5</sub>                   | 303657                      | USD                               | 4        |
| P <sub>in</sub>                  | 1000                        | psi                               | 1, 3     |
| P <sub>out</sub>                 | 700                         | psi                               | 1, 3     |
| ρ <sub>rel</sub>                 | 0.06897                     | -                                 | 1        |
| T                                | 298.15                      | K                                 | 1, 3     |
| Re <sub>HCOOH</sub>              | 53375                       | -                                 | 6        |
| Re <sub>CH<sub>3</sub>OH</sub>   | 56103                       | -                                 | 6        |
| Re <sub>NH<sub>3</sub></sub>     | 168623                      | -                                 | 6        |
| Re <sub>HCOOCH<sub>3</sub></sub> | 176294                      | -                                 | 6        |
| ε                                | 4.6 x 10 <sup>-5</sup>      | m                                 | 6        |
| X <sub>mat</sub>                 | 0.75                        | -                                 | 7        |
| %R <sub>1</sub>                  | 100                         | %                                 | 24       |
| %R <sub>2</sub>                  | 5                           | %                                 | 24, 27   |

Supplemental equations:

$$(S1) \quad \dot{W}_{compressor} = Z_{LM} \cdot \frac{\dot{M} \cdot R \cdot T}{36M_W \cdot \epsilon} \cdot \frac{\gamma}{\gamma - 1} \cdot \left[ \left( \frac{P_{in}}{P_0} \right)^{\frac{\gamma-1}{N \cdot \gamma}} - 1 \right]$$

$$(S2) \quad \dot{W}_{liquefier} = 19.4312 \cdot \dot{M}^{0.9} \cdot N^{0.1}$$

$$(S3) \quad \text{Break Even Emissions Recovery Time } (t_{leak} \text{ in hrs}) = t_{leak} \cdot \frac{GWP \cdot \dot{M}}{\dot{C}F_{net}}$$

$$(S4) \quad \text{Break Even Leak Rate} = \frac{1}{\frac{GWP \cdot \dot{M}}{\dot{C}F_{net}} + 1} \cdot 100\%$$

## II. Supply chain specification table

---

Table S2.

| Supply Chain # | Production                  | Storage        | Transport | End Use              |
|----------------|-----------------------------|----------------|-----------|----------------------|
| 1              | Biomass Gasification        | Gas H2         | Pipeline  | Fertilizer           |
| 2              | Biomass Gasification        | Gas H2         | Pipeline  | FCEV vehicle filling |
| 3              | Biomass Gasification        | Gas H2         | Railcar   | Fertilizer           |
| 4              | Biomass Gasification        | Gas H2         | Railcar   | FCEV vehicle filling |
| 5              | Biomass Gasification        | Formic Acid    | Pipeline  | Fertilizer           |
| 6              | Biomass Gasification        | Formic Acid    | Pipeline  | FCEV vehicle filling |
| 7              | Biomass Gasification        | Formic Acid    | Railcar   | Fertilizer           |
| 8              | Biomass Gasification        | Formic Acid    | Railcar   | FCEV vehicle filling |
| 9              | Biomass Gasification        | Liquid H2      | Truck     | Fertilizer           |
| 10             | Biomass Gasification        | Liquid H2      | Truck     | FCEV vehicle filling |
| 11             | Biomass Gasification        | Liquid H2      | Railcar   | Fertilizer           |
| 12             | Biomass Gasification        | Liquid H2      | Railcar   | FCEV vehicle filling |
| 13             | CO2 Electrolysis PV Coupled | Methyl Formate | Pipeline  | Fertilizer           |
| 14             | CO2 Electrolysis PV Coupled | Methyl Formate | Pipeline  | FCEV vehicle filling |
| 15             | CO2 Electrolysis PV Coupled | Methyl Formate | Railcar   | Fertilizer           |

|    |                                |                   |          |                         |
|----|--------------------------------|-------------------|----------|-------------------------|
| 16 | CO2 Electrolysis PV<br>Coupled | Methyl<br>Formate | Railcar  | FCEV vehicle<br>filling |
| 17 | CO2 Electrolysis PV<br>Coupled | Formic Acid       | Pipeline | Fertilizer              |
| 18 | CO2 Electrolysis PV<br>Coupled | Formic Acid       | Pipeline | FCEV vehicle<br>filling |
| 19 | CO2 Electrolysis PV<br>Coupled | Formic Acid       | Railcar  | Fertilizer              |
| 20 | CO2 Electrolysis PV<br>Coupled | Formic Acid       | Railcar  | FCEV vehicle<br>filling |
| 21 | CO2 Electrolysis PV<br>Coupled | Methanol          | Pipeline | Fertilizer              |
| 22 | CO2 Electrolysis PV<br>Coupled | Methanol          | Pipeline | FCEV vehicle<br>filling |
| 23 | CO2 Electrolysis PV<br>Coupled | Methanol          | Railcar  | Fertilizer              |
| 24 | CO2 Electrolysis PV<br>Coupled | Methanol          | Railcar  | FCEV vehicle<br>filling |
| 25 | N2 Electrolysis PV<br>Coupled  | Ammonia           | Pipeline | Fertilizer              |
| 26 | N2 Electrolysis PV<br>Coupled  | Ammonia           | Pipeline | FCEV vehicle<br>filling |
| 27 | N2 Electrolysis PV<br>Coupled  | Ammonia           | Railcar  | Fertilizer              |
| 28 | N2 Electrolysis PV<br>Coupled  | Ammonia           | Railcar  | FCEV vehicle<br>filling |
| 29 | H2O electrolysis PV<br>Coupled | Gas H2            | Pipeline | Fertilizer              |
| 30 | H2O electrolysis PV<br>Coupled | Gas H2            | Pipeline | FCEV vehicle<br>filling |
| 31 | H2O electrolysis PV<br>Coupled | Gas H2            | Railcar  | Fertilizer              |
| 32 | H2O electrolysis PV<br>Coupled | Gas H2            | Railcar  | FCEV vehicle<br>filling |
| 33 | H2O electrolysis PV<br>Coupled | Formic Acid       | Pipeline | Fertilizer              |
| 34 | H2O electrolysis PV<br>Coupled | Formic Acid       | Pipeline | FCEV vehicle<br>filling |
| 35 | H2O electrolysis PV<br>Coupled | Formic Acid       | Railcar  | Fertilizer              |
| 36 | H2O electrolysis PV<br>Coupled | Formic Acid       | Railcar  | FCEV vehicle<br>filling |
| 37 | H2O electrolysis PV<br>Coupled | Liquid H2         | Truck    | Fertilizer              |
| 38 | H2O electrolysis PV<br>Coupled | Liquid H2         | Truck    | FCEV vehicle<br>filling |
| 39 | H2O electrolysis PV<br>Coupled | Liquid H2         | Railcar  | Fertilizer              |
| 40 | H2O electrolysis PV<br>Coupled | Liquid H2         | Railcar  | FCEV vehicle<br>filling |
| 41 | SMR                            | Gas H2            | Pipeline | Fertilizer              |

|    |             |                |          |                      |
|----|-------------|----------------|----------|----------------------|
| 42 | SMR         | Gas H2         | Pipeline | FCEV vehicle filling |
| 43 | SMR         | Gas H2         | Railcar  | Fertilizer           |
| 44 | SMR         | Gas H2         | Railcar  | FCEV vehicle filling |
| 45 | SMR         | Formic Acid    | Pipeline | Fertilizer           |
| 46 | SMR         | Formic Acid    | Pipeline | FCEV vehicle filling |
| 47 | SMR         | Formic Acid    | Railcar  | Fertilizer           |
| 48 | SMR         | Formic Acid    | Railcar  | FCEV vehicle filling |
| 49 | SMR         | Liquid H2      | Truck    | Fertilizer           |
| 50 | SMR         | Liquid H2      | Truck    | FCEV vehicle filling |
| 51 | SMR         | Liquid H2      | Railcar  | Fertilizer           |
| 52 | SMR         | Liquid H2      | Railcar  | FCEV vehicle filling |
| 53 | CO Purchase | Methyl Formate | Pipeline | Fertilizer           |
| 54 | CO Purchase | Methyl Formate | Pipeline | FCEV vehicle filling |
| 55 | CO Purchase | Methyl Formate | Railcar  | Fertilizer           |
| 56 | CO Purchase | Methyl Formate | Railcar  | FCEV vehicle filling |
| 57 | CO Purchase | Formic Acid    | Pipeline | Fertilizer           |
| 58 | CO Purchase | Formic Acid    | Pipeline | FCEV vehicle filling |
| 59 | CO Purchase | Formic Acid    | Railcar  | Fertilizer           |
| 60 | CO Purchase | Formic Acid    | Railcar  | FCEV vehicle filling |
| 61 | CO Purchase | Methanol       | Pipeline | Fertilizer           |
| 62 | CO Purchase | Methanol       | Pipeline | FCEV vehicle filling |
| 63 | CO Purchase | Methanol       | Railcar  | Fertilizer           |
| 64 | CO Purchase | Methanol       | Railcar  | FCEV vehicle filling |

### III. Supplemental Analysis - Feedstock Price Perturbation

The default scenarios, 1 through 64, utilise commodity price data found in government databases, techno-economic analyses, and market data hubs. Similarly, as discussed in the previous section, the changes in the price of the feedstocks can significantly alter the economic viability of a business case. This section analyses the effect of increasing, and occasionally decreasing, the purchase price of these commodities to visualise how future market fluctuations can potentially disturb the hydrogen business.

Figure SA1 shows key parameters of the 25-year NPV functions for all non-electrolyser supply chains. These NPV functions are derived from at least four feedstock price points (scenarios 1-12, 41-64, 129-132, 161-196, and 225-248), starting at zero then low, medium, and high. When segregated by production technology and end-use, there is an interesting linear trend that appears when the maximum NPV is plotted against the break-even feedstock price. This trend correlates supply chains with different storage mediums and transportation methods, indicating that the rate of NPV appreciation depends only on the production method and end-use. The storage medium and transportation method seem to only affect the maximum achievable NPV and does not change the relationship between NPV and feedstock price. This is a peculiar result since there appears to be no obvious connection between those supply chains. Nevertheless, the result makes determining break-even feedstock prices very predictable, as any new supply chain may be classified into any of the six groups in Figure SA1 and the break-even feedstock price can be determined from the NPV of the zero-cost business.

Similarly, the BEHP can also be grouped into the same six groups. Figure SA2 shows the minimum achievable BEHP for each supply chain. Using the feedstock price correlation shown in Figure S6, one can determine the price necessary to reach a BEHP of 2.00 USD kg<sup>-1</sup> can be determined by the X-intercept. This equivalent feedstock price is plotted on the vertical axis of Figure SA2 to show the linear relationship for each class of supply chains. In plots A, D, and E, most supply chains are not able to reach the desired BEHP. Despite this, they still correlate with the other data to create a strong regression line. The Y-intercept of this line shows the maximum feedstock price for each class that can still break-even selling hydrogen at the aforementioned price. The Y-intercepts

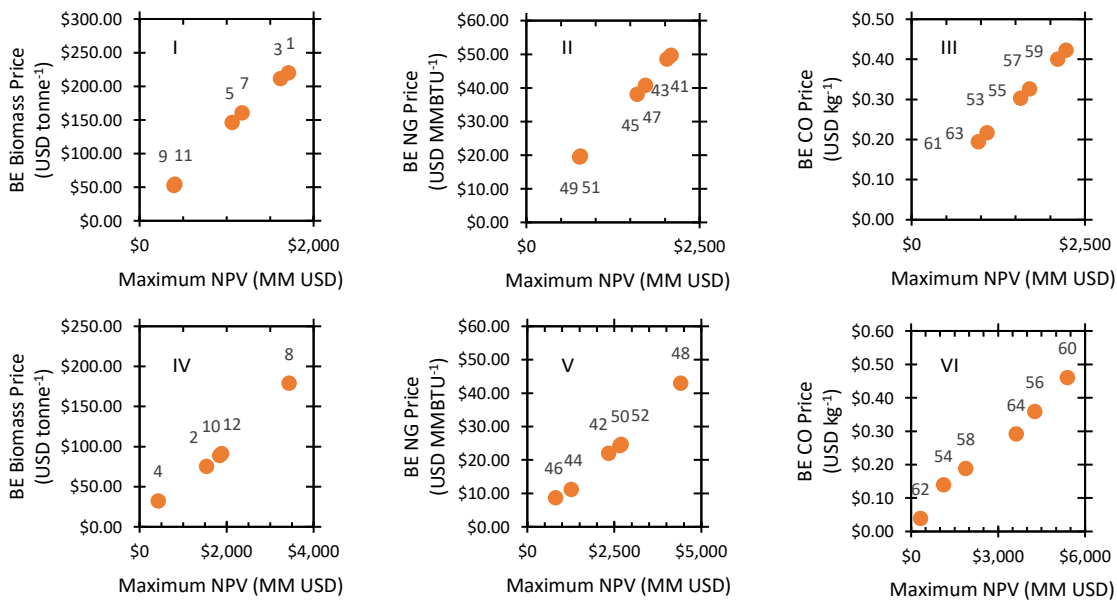

**Figure SA1** 25-year net present value functions, separated by feedstock type and end-use. A feedstock price of zero provides the maximum achievable NPV, plotted against the break-even feedstock price to achieve a positive NPV. Each point is labelled with the respective supply chain. (A) Wood BG-Fertiliser Manufacturing (B) Wood BG-FCEV Filling (C) SMR-Fertiliser Manufacturing (D) SMR-FCEV Filling (E) CO Purchase-Fertiliser Manufacturing (F) CO Purchase-FCEV Filling. Supply chain 6 is not shown on the B plot because its maximum NPV is negative.

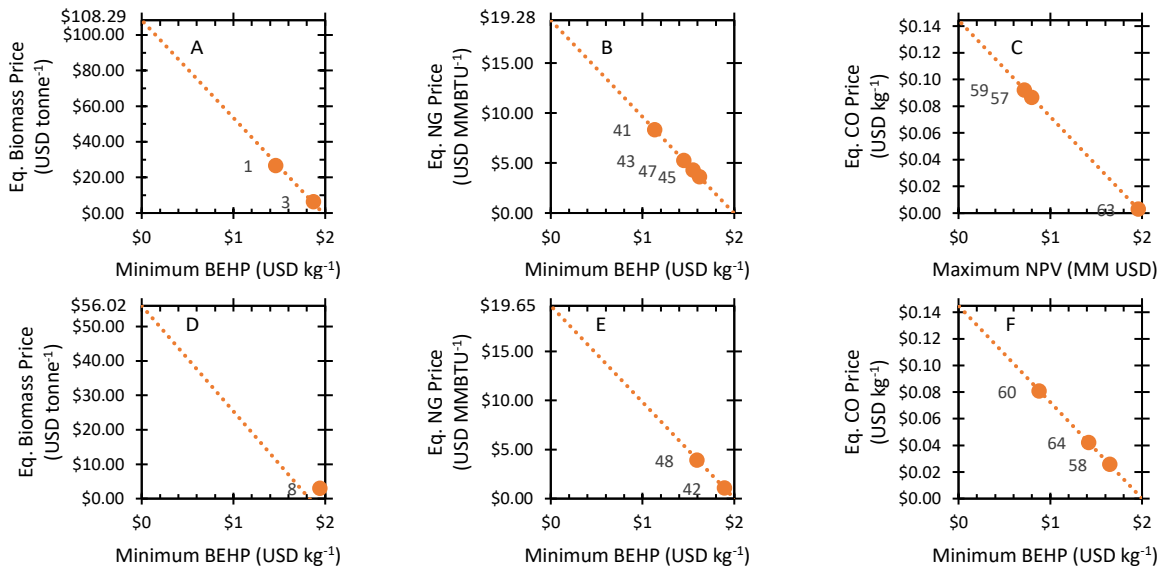

**Figure SA2** Break-even hydrogen price functions, separated by feedstock type and end-use. A feedstock price of zero provides the minimum achievable BEHP, plotted against the minimum feedstock price needed to achieve a BEHP of 2.00 USD kg<sup>-1</sup>. Each point is labelled with the respective supply chain. (A) Wood BG-Fertiliser Manufacturing (B) Wood BG-FCEV Filling (C) SMR-Fertiliser Manufacturing (D) SMR-FCEV Filling (E) CO Purchase-Fertiliser Manufacturing (F) CO Purchase-FCEV Filling. Points not shown on the plot have negative equivalent feedstock prices.

indicate that the change in end-use does not have a significant effect; only plot 21A and 21D display a major difference. Furthermore, the latter's weaker regression ( $R^2 = 0.9743$ ) is significantly more variable than the next sparse regression ( $R^2 = 0.9996$ ), so the difference should be questioned. This is mainly due to an outlier, supply chain 4 at point (5.34, -103.38), which has a high leverage and pulls the Y-intercept of the regression down. Excluding this outlier, the Y-intercept and regression coefficient become 94.84 USD tonne<sup>-1</sup> and 0.9864 respectively, approaching the regression of plot 21A. Despite the results from a two-sample t-test indicating that only 21C and 21F are statistically identical using 95% confidence, the effect of varying the end-use is negligible in each case.

### III. Supplemental Figures

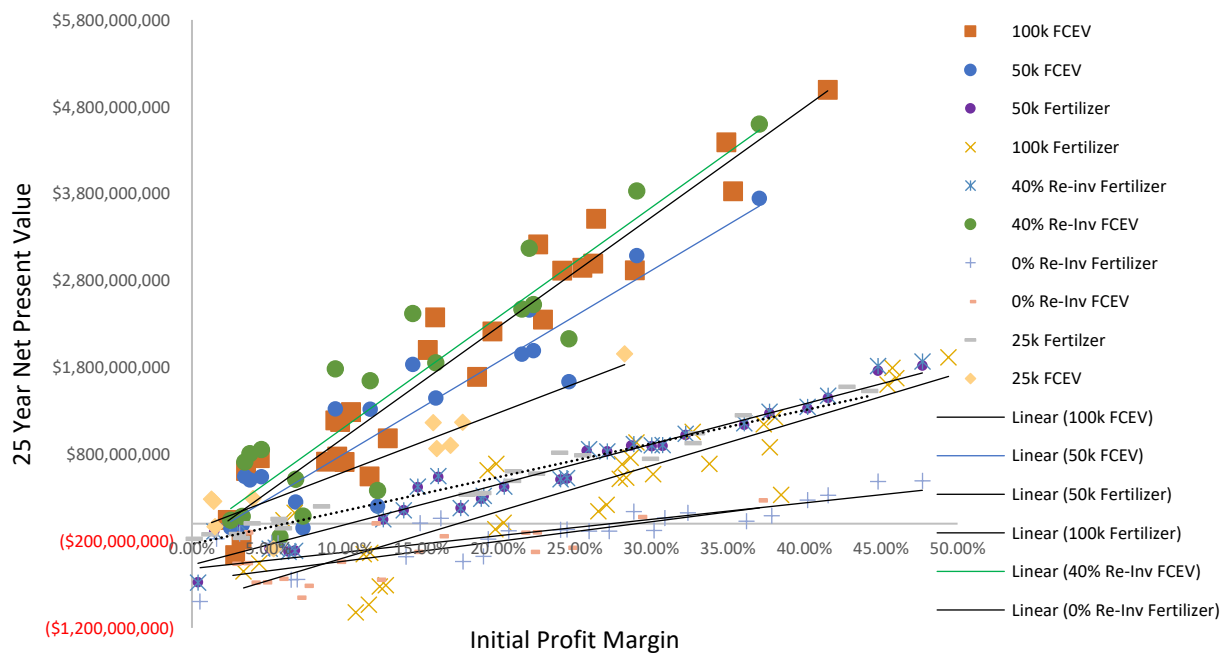

**Figure S1.** NPV achieved for various scaling strategies, plotted against the respective initial profit margin.

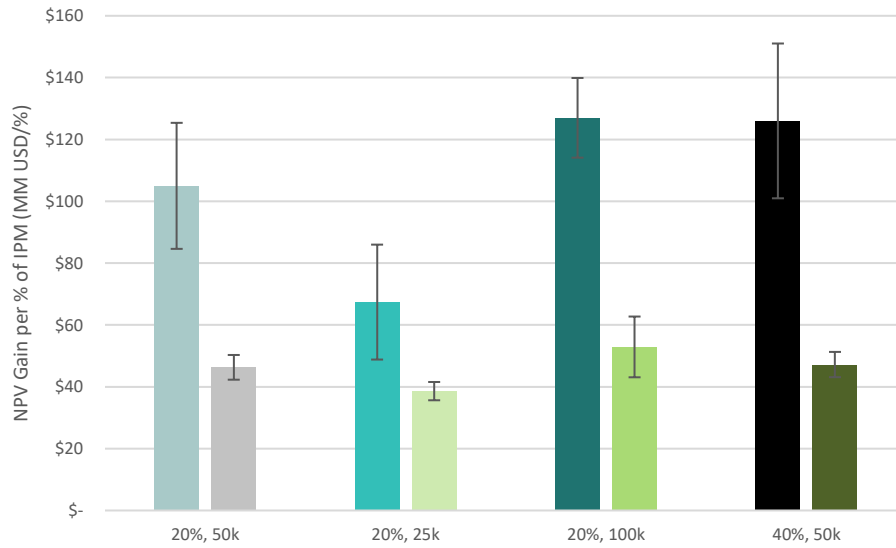

Figure S2. Slope of NPV as a function of Initial Profit Margin (IPM). Shown with regression confidence intervals and split into experimental groups. [end-use, initial daily production, reinvestment rate]: FCEV, 50k, 40% (**olive**); FCEV, 100k, 20% (**green**); FCEV, 50k, 20% (**grey**); FCEV, 25k, 20% (**light green**); Fert., 25k, 20% (**cyan**); Fert., 50k, 20% (**pale blue**); Fert., 50k, 40% (**black**); Fert., 100k, 20% (**dark blue**).

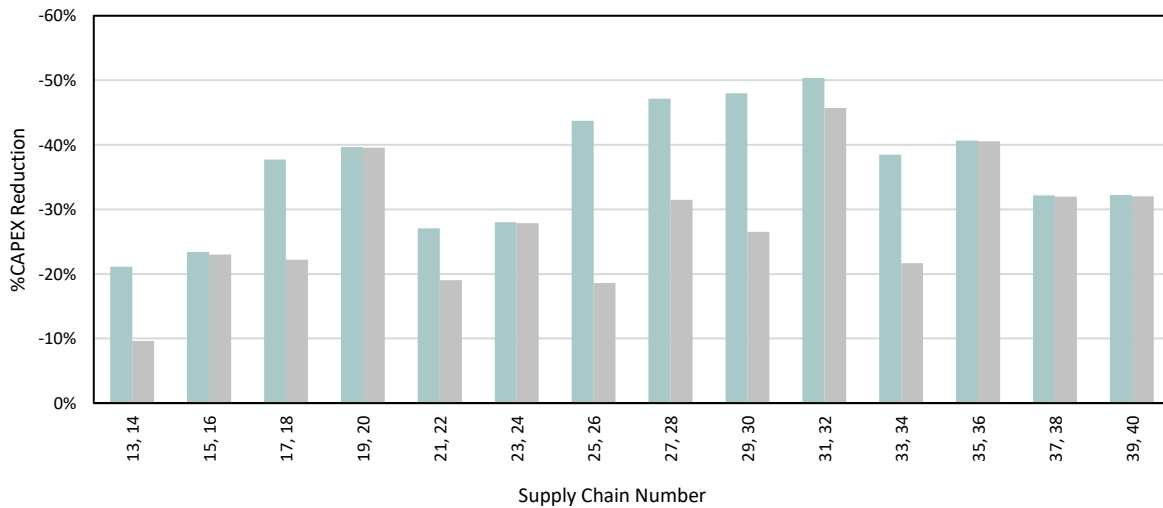

Figure S3. Reduction in total overnight cost for each electrolyser supply chain. Fertiliser supply chains are shown in **pale blue** and FCEV filling supply chains are shown in **grey**.



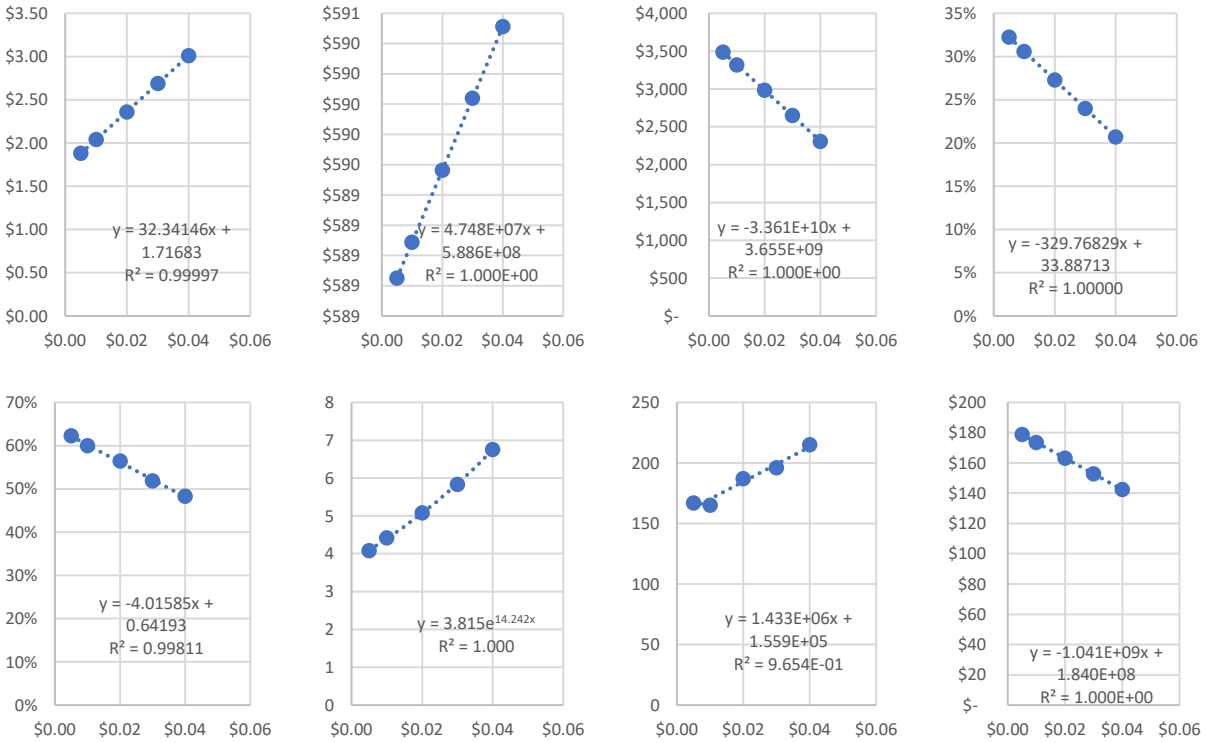

Figure S4. Business properties of supply chain 20 as a function of electricity price during 23-hour operation strategy: **A.** Break-even hydrogen price; **B.** Total overnight cost (MM USD); **C.** Net present value (MM USD); **D.** Initial profit margin; **E.** Max profit margin; **F.** Payback period; **G.** Minimum profitable production scale (x 10<sup>3</sup> kg/day); **H.** Monthly EBITDA at year 25 (MM USD).

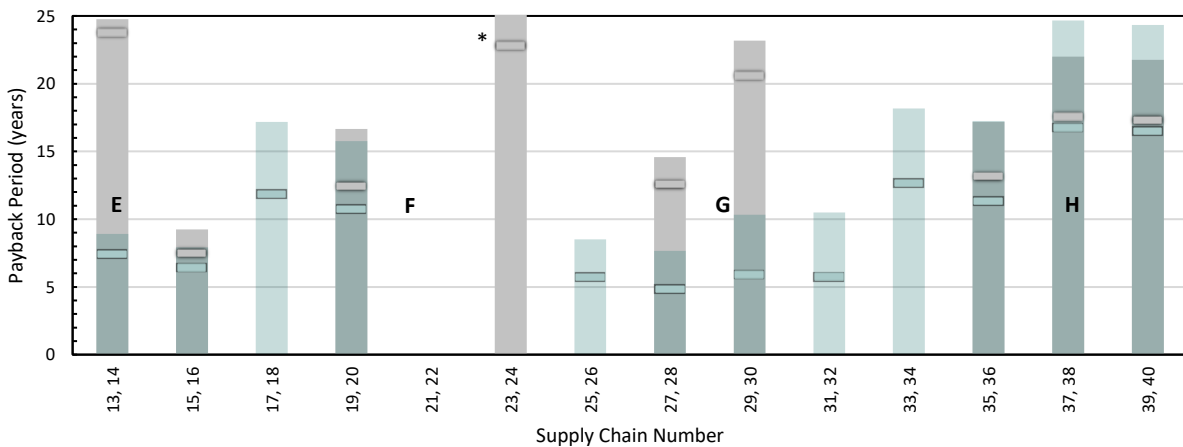

Figure S5. Payback period comparison between the default electrolyser scenarios (bars) and the 0.04 USD/kWh electricity purchasing scenario using the 23-hour strategy. Supply chains that do not achieve a payback period less than 25 years with either strategy are not shown. \*PBP for supply chain 24 is greater than 25 years.

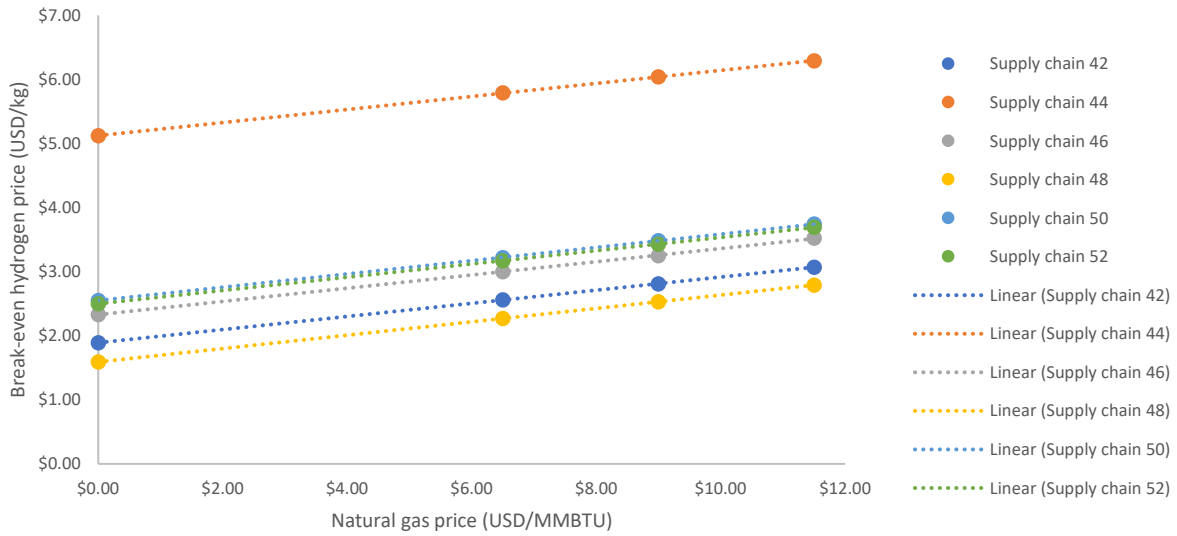

Figure S6. Example of linear regression of BEHP vs. price for SMR supply chains.

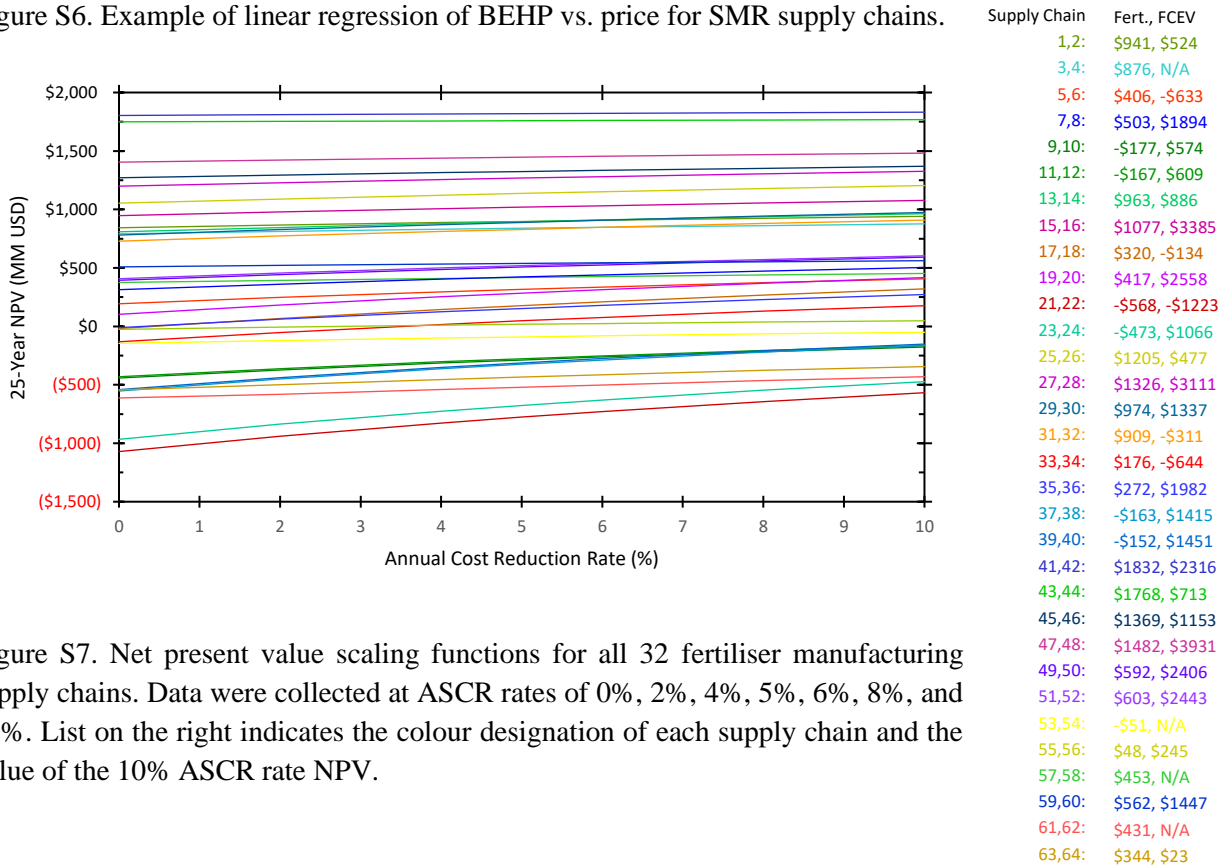

Figure S7. Net present value scaling functions for all 32 fertiliser manufacturing supply chains. Data were collected at ASCR rates of 0%, 2%, 4%, 5%, 6%, 8%, and 10%. List on the right indicates the colour designation of each supply chain and the value of the 10% ASCR rate NPV.

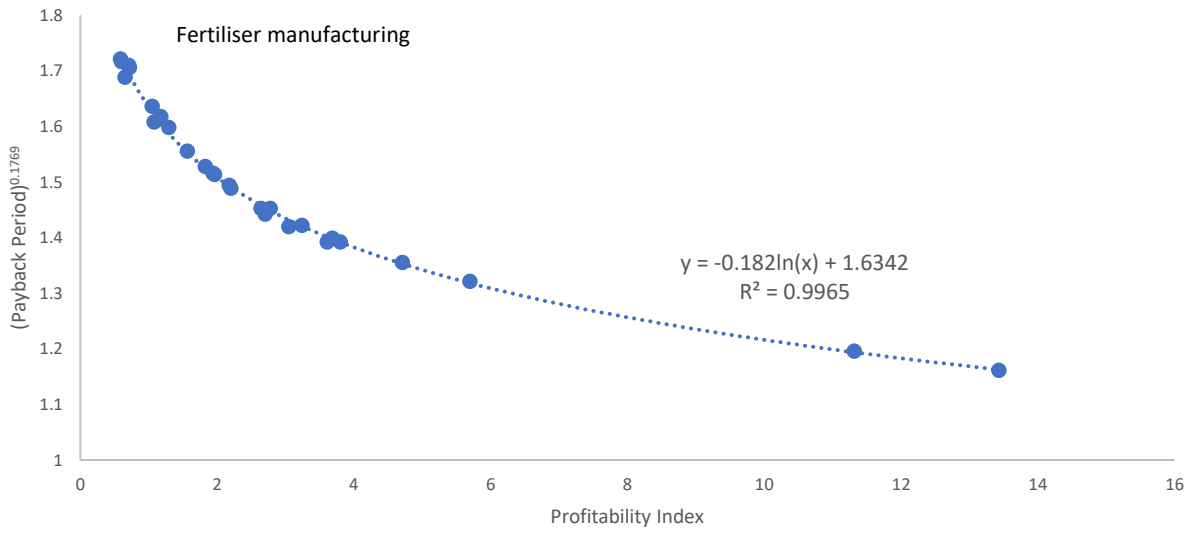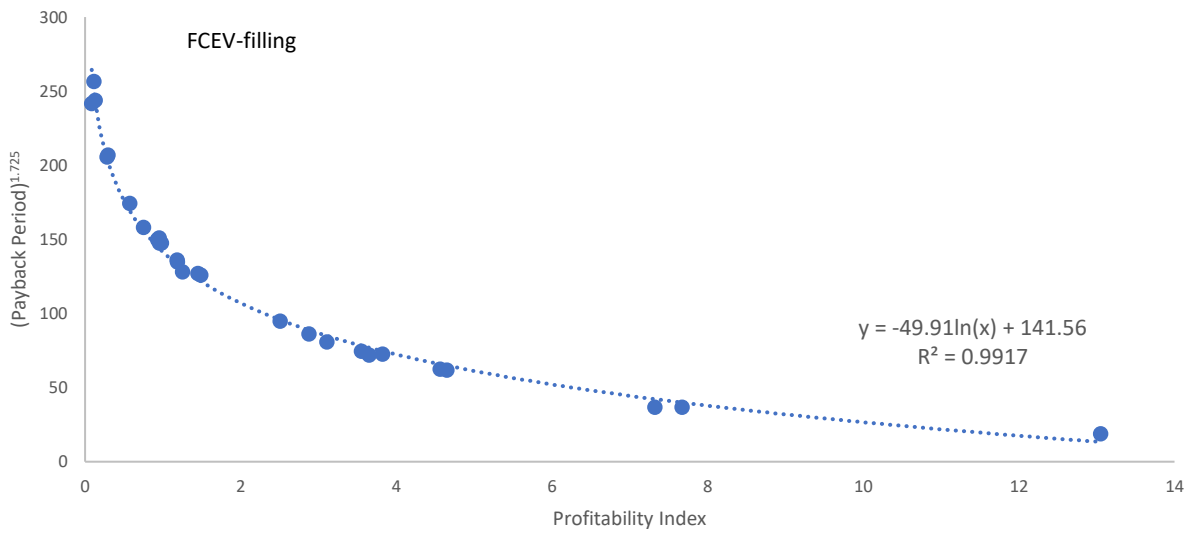

Figure S8. Correlation between profitability index and the supply chain’s payback period. The parity between payback period exponents indicates the sensitivity of the payback period to the business case’s PI, where fertiliser manufacturing is more sensitive to changes in PI.

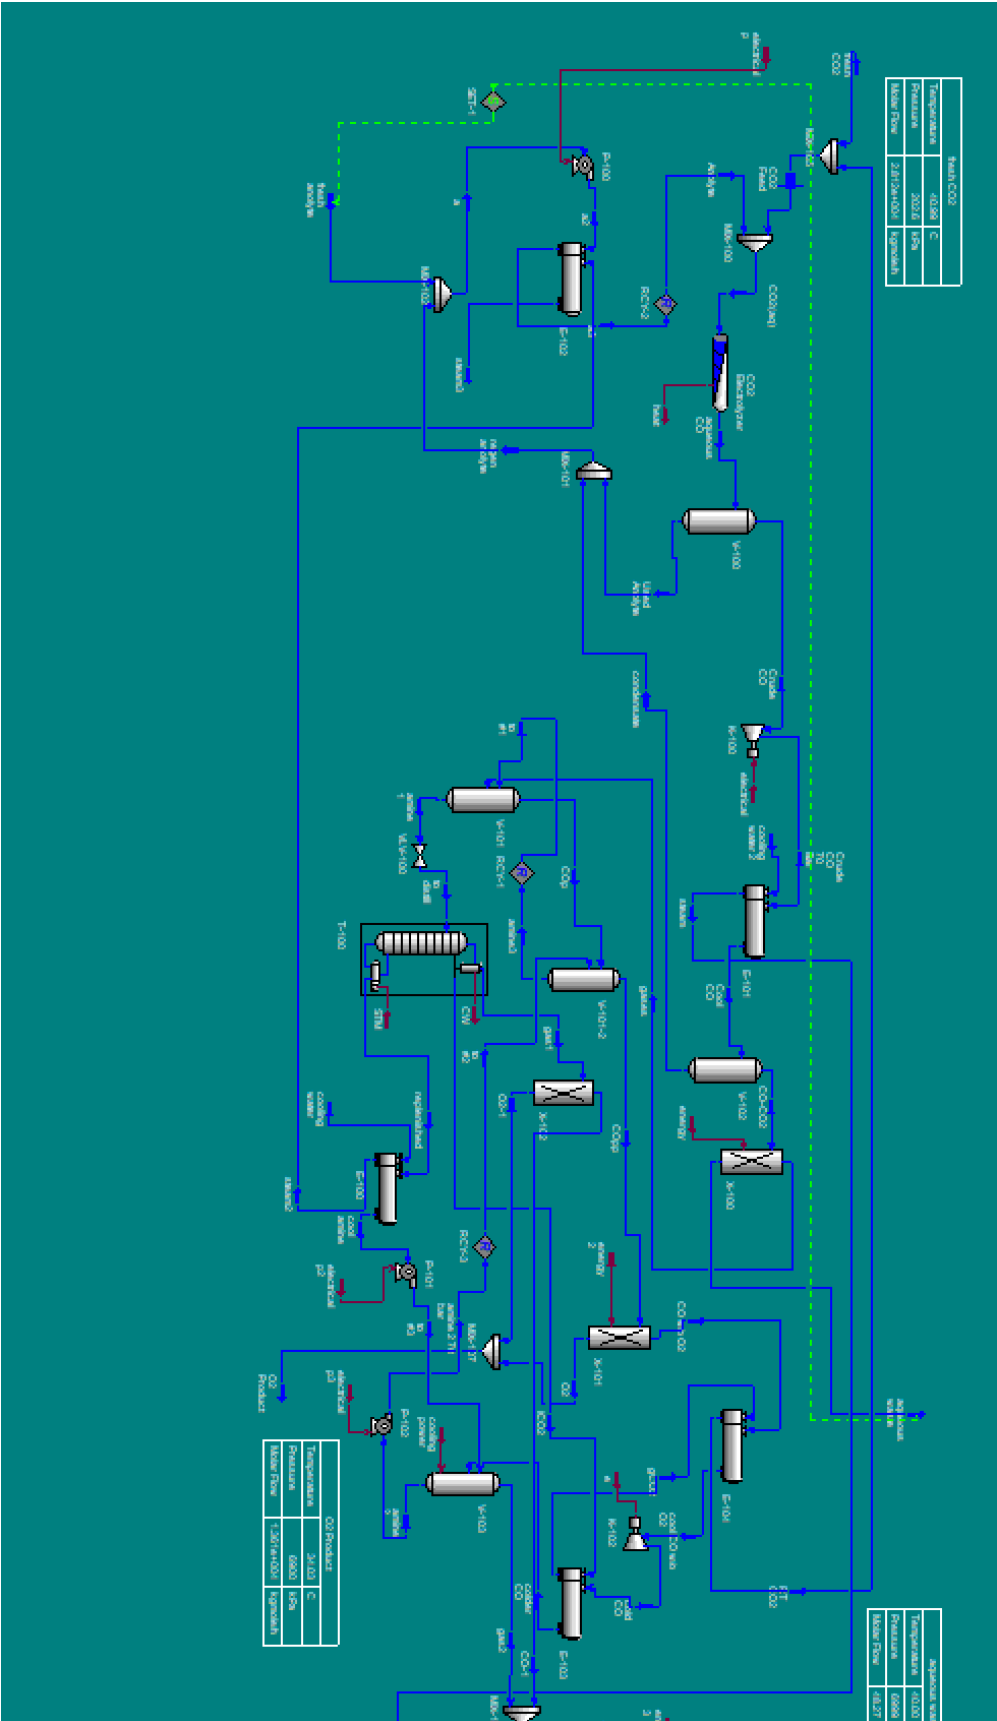

Figure S9. UniSim Design process flow diagram for a CO<sub>2</sub> electrolysis to formic acid supply chain. Electricity generation and transportation equipment not shown. Inlet streams include carbon dioxide, electrolyser analyte, methanol, and water. Outlet streams include aqueous waste, oxygen, methyl formate-rich gas, methanol recycle, and formic acid.

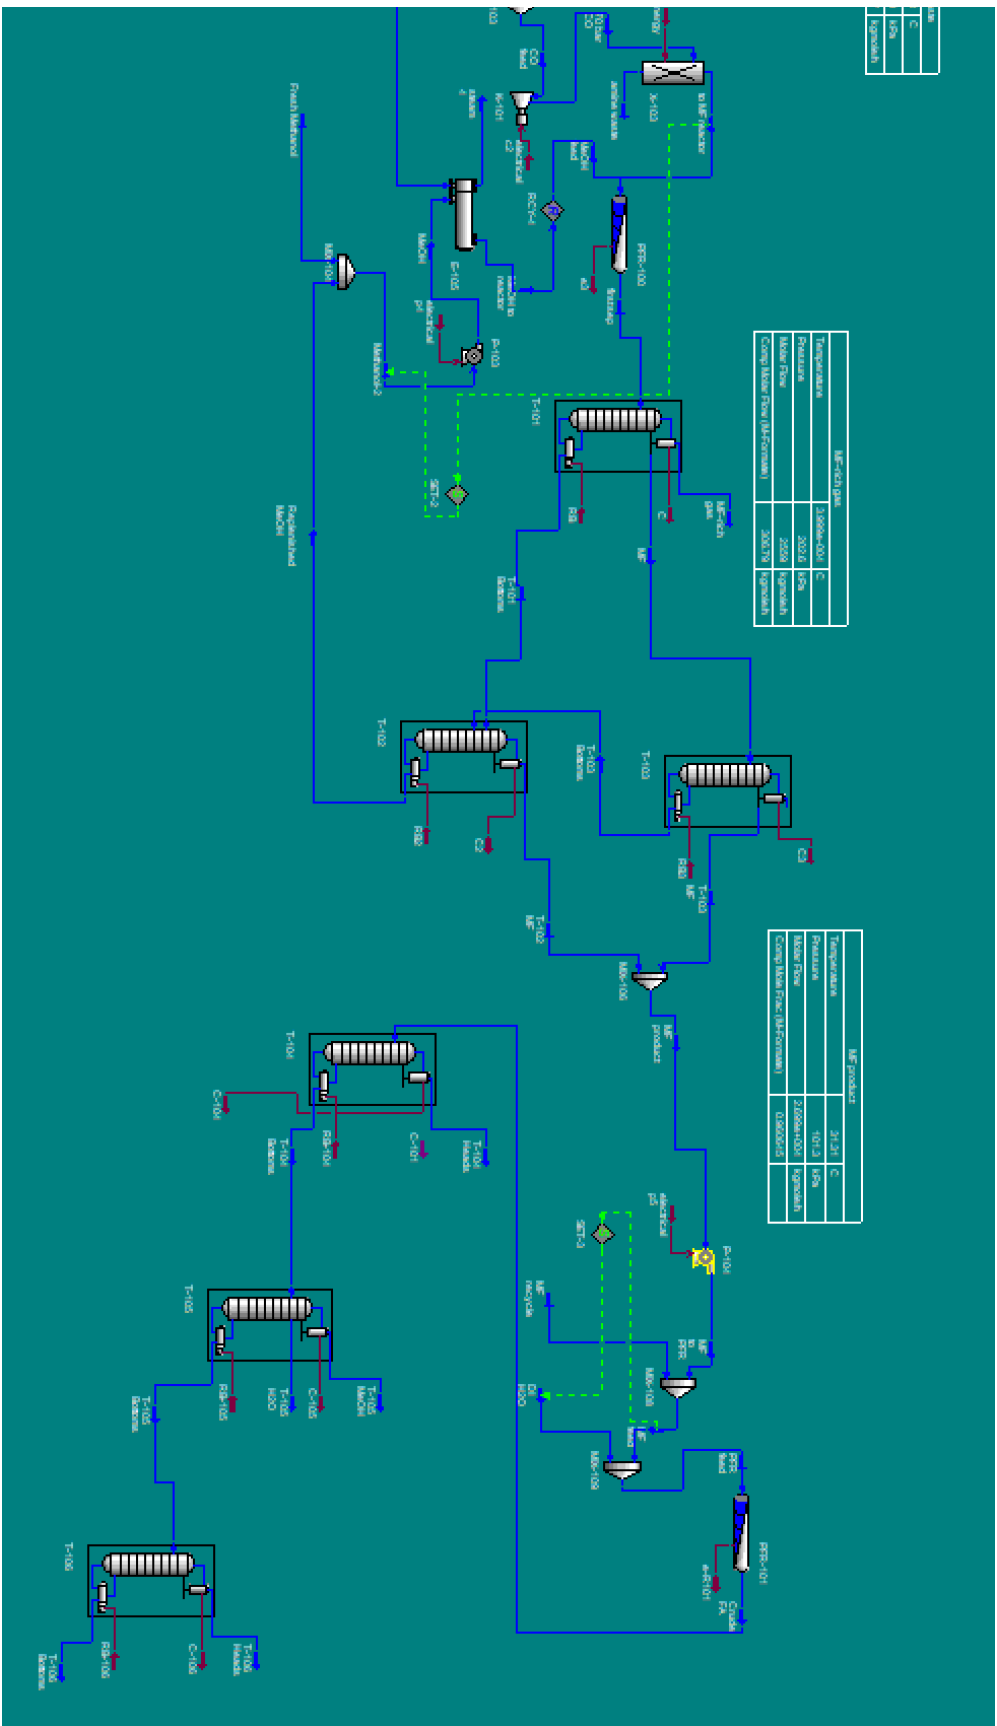

Figure S9. UniSim Design process flow diagram for a CO<sub>2</sub> electrolysis to formic acid supply chain. Electricity generation and transportation equipment not shown. Inlet streams include carbon dioxide, electrolyser analyte, methanol, and water. Outlet streams include aqueous waste, oxygen, methyl formate-rich gas, methanol recycle, and formic acid.

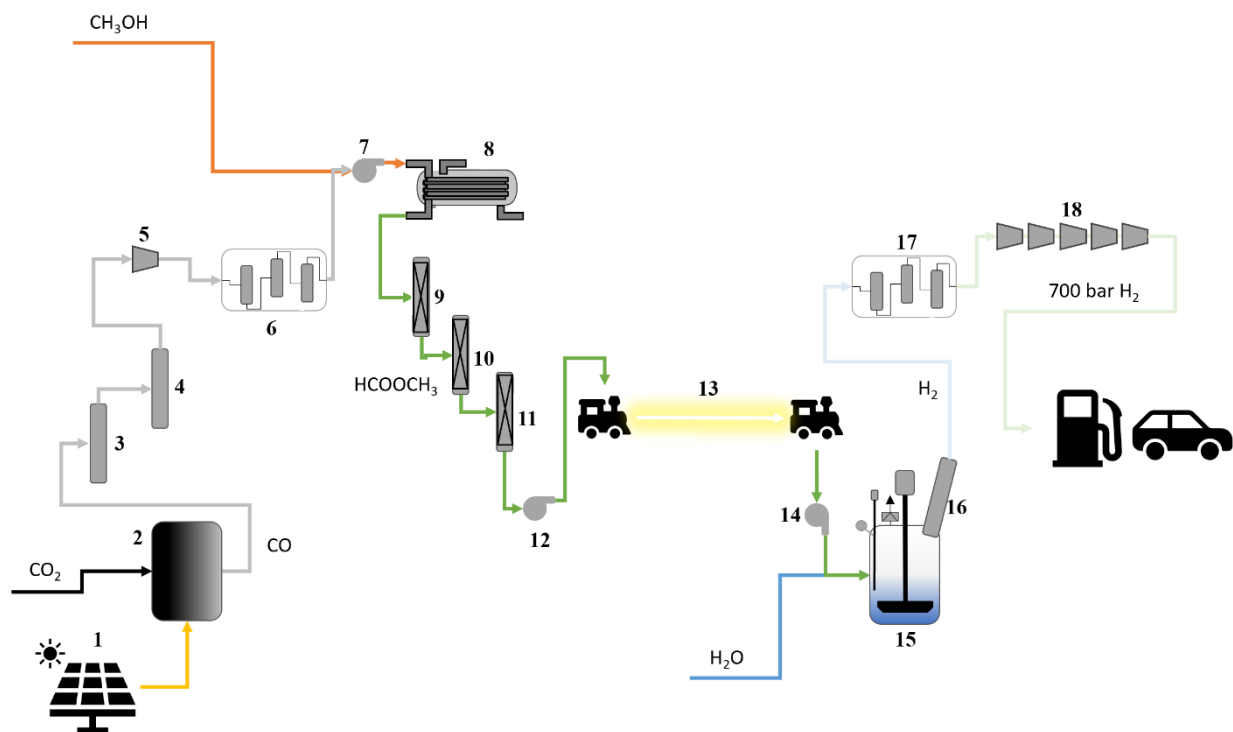

Figure S10. Simplified process flow diagram of supply chain **16**. All equipment items and processes costed in HBAT are listed with exceptions. For simplicity, heat exchangers, storage tanks, and recycle streams are not shown but are also accounted for. Production: PV-coupled CO<sub>2</sub> electrolysis; storage: methyl formate; transportation: railcar; end-use: FCEV filling.

Table S3. Example equipment list for supply chain **16**.

| Identifier # | Equipment Item                             | Bare Module Cost (x10 <sup>3</sup> USD) |
|--------------|--------------------------------------------|-----------------------------------------|
| <b>1</b>     | PV Solar Arrays                            | 53,000                                  |
| <b>2</b>     | CO <sub>2</sub> Electrolyser               | 43,000                                  |
| <b>3</b>     | Flash Vessel                               | 50                                      |
| <b>4</b>     | Flash Vessel                               | 50                                      |
| <b>5</b>     | Generic Compressor                         | 1,703                                   |
| <b>6</b>     | Sweet/Sour Amine Seps.                     | 57,000                                  |
| <b>7</b>     | Positive Displacement Pump                 | 173                                     |
| <b>8</b>     | Plug-Flow Methanol Carbonylation Reactor   | 4,415                                   |
| <b>9</b>     | Distillation Column                        | 433                                     |
| <b>10</b>    | Distillation Column                        | 433                                     |
| <b>11</b>    | Distillation Column                        | 433                                     |
| <b>12</b>    | Positive Displacement Pump                 | 173                                     |
| <b>13</b>    | Methyl Formate Railcars                    | 280                                     |
| <b>14</b>    | Positive Displacement Pump                 | 173                                     |
| <b>15</b>    | Methyl Formate Dehydrogenation Reactor     | 107,000                                 |
| <b>16</b>    | Reflux Condenser                           | 253                                     |
| <b>17</b>    | Pressure-Swing Adsorption Seps.            | 9,962                                   |
| <b>18</b>    | Five-Stage FCEV H <sub>2</sub> Compressors | 4,617                                   |

Table S4. ASCR optimization results. Red highlight indicates negative NPV scenario.

| Supply Chain # | Max R&D Annual Benefit per Point | Optimal ASCR (%) | Total Annual Benefit |
|----------------|----------------------------------|------------------|----------------------|
| 1              | \$ 10,719,677                    | 2                | \$ 21,439,355        |
| 2              | \$ 49,069,586                    | 10               | \$ 490,695,858       |
| 3              | \$ 9,333,618                     | 2                | \$ 18,667,236        |
| 4              | \$ 25,481,437                    | 2                | \$ 50,962,875        |
| 5              | \$ 53,171,108                    | 10               | \$ 531,711,077       |
| 6              | \$ 22,361,748                    | 2                | \$ 44,723,496        |
| 7              | \$ 194,359,253                   | 2                | \$ 388,718,506       |
| 8              | \$ 32,061,843                    | 2                | \$ 64,123,687        |
| 9              | \$ 53,774,221                    | 10               | \$ 537,742,211       |
| 10             | \$ 32,052,356                    | 2                | \$ 64,104,712        |
| 11             | \$ 57,066,772                    | 10               | \$ 570,667,720       |
| 12             | \$ 17,446,766                    | 2                | \$ 34,893,532        |
| 13             | \$ 82,955,333                    | 10               | \$ 829,553,328       |
| 14             | \$ 14,455,823                    | 2                | \$ 28,911,647        |
| 15             | \$ 116,283,667                   | 2                | \$ 232,567,334       |
| 16             | \$ 33,665,922                    | 4                | \$ 134,663,689       |
| 17             | \$ 137,717,553                   | 10               | \$ 1,377,175,530     |
| 18             | \$ 37,634,931                    | 2                | \$ 75,269,862        |
| 19             | \$ 313,592,845                   | 2                | \$ 627,185,691       |
| 20             | \$ 61,190,095                    | 2                | \$ 122,380,191       |
| 21             | \$ 72,118,458                    | 10               | \$ 721,184,579       |
| 22             | \$ 60,544,701                    | 2                | \$ 121,089,401       |
| 23             | \$ 99,827,371                    | 10               | \$ 998,273,707       |
| 24             | \$ 16,635,518                    | 2                | \$ 33,271,037        |
| 25             | \$ 44,651,137                    | 10               | \$ 446,511,375       |
| 26             | \$ 13,831,835                    | 2                | \$ 27,663,670        |
| 27             | \$ 283,922,177                   | 2                | \$ 567,844,353       |
| 28             | \$ 21,839,227                    | 2                | \$ 43,678,454        |
| 29             | \$ 125,206,062                   | 10               | \$ 1,252,060,624     |
| 30             | \$ 20,397,915                    | 2                | \$ 40,795,829        |
| 31             | \$ 45,425,268                    | 10               | \$ 454,252,679       |
| 32             | \$ 16,512,862                    | 10               | \$ 165,128,620       |
| 33             | \$ 86,858,150                    | 10               | \$ 868,581,499       |
| 34             | \$ 29,120,184                    | 4                | \$ 116,480,737       |
| 35             | \$ 275,801,069                   | 2                | \$ 551,602,139       |
| 36             | \$ 48,230,851                    | 2                | \$ 96,461,703        |
| 37             | \$ 132,536,830                   | 10               | \$ 1,325,368,301     |
| 38             | \$ 48,075,372                    | 2                | \$ 96,150,744        |
| 39             | \$ 135,913,639                   | 10               | \$ 1,359,136,387     |
| 40             | \$ 2,860,030                     | 2                | \$ 5,720,061         |
| 41             | \$ 267,564,565                   | 2                | \$ 535,129,130       |
| 42             | \$ 1,944,547                     | 2                | \$ 3,889,094         |

|           |    |             |    |    |               |
|-----------|----|-------------|----|----|---------------|
| <b>43</b> | \$ | 74,174,346  | 2  | \$ | 148,348,692   |
| <b>44</b> | \$ | 10,590,074  | 2  | \$ | 21,180,148    |
| <b>45</b> | \$ | 108,054,420 | 10 | \$ | 1,080,544,203 |
| <b>46</b> | \$ | 8,197,257   | 2  | \$ | 16,394,513    |
| <b>47</b> | \$ | 69,692,405  | 2  | \$ | 139,384,810   |
| <b>48</b> | \$ | 23,145,056  | 2  | \$ | 46,290,112    |
| <b>49</b> | \$ | 197,959,188 | 2  | \$ | 395,918,376   |
| <b>50</b> | \$ | 22,949,684  | 2  | \$ | 45,899,368    |
| <b>51</b> | \$ | 194,812,158 | 2  | \$ | 389,624,316   |
| <b>52</b> | \$ | 11,579,222  | 2  | \$ | 23,158,444    |
| <b>53</b> |    |             |    |    |               |
| <b>54</b> | \$ | 4,456,026   | 10 | \$ | 44,560,256    |
| <b>55</b> | \$ | 22,960,153  | 10 | \$ | 229,601,528   |
| <b>56</b> | \$ | 8,724,343   | 2  | \$ | 17,448,686    |
| <b>57</b> |    |             |    |    |               |
| <b>58</b> | \$ | 5,802,588   | 2  | \$ | 11,605,175    |
| <b>59</b> | \$ | 50,207,512  | 2  | \$ | 100,415,024   |
| <b>60</b> | \$ | 17,437,648  | 6  | \$ | 104,625,889   |
| <b>61</b> |    |             |    |    |               |
| <b>62</b> | \$ | 20,920,996  | 4  | \$ | 83,683,983    |
| <b>63</b> | \$ | 52,064,201  | 10 | \$ | 520,642,009   |
| <b>64</b> | \$ | 10,719,677  | 2  | \$ | 21,439,355    |



#### IV. Data sources and references

---

| Data Acquired for Selected Counties | Data Source    |
|-------------------------------------|----------------|
| Market Availability                 | 1-5            |
| Market Size                         | 1-5            |
| Consumption of Hydrogen             | 1-3            |
| Cost of Water/Water Treatment       | 4              |
| Supply of Clean Energy              | 11, 14, 18-29  |
| Real Estate Cost                    | 30-33          |
| Current Price of Oil                | 34             |
| Current Price of Local Gasoline     | 35-38          |
| Current Price of Local Electricity  | 7-17           |
| Current Price of Steel              | 39-40          |
| Government Incentives               | 41-45          |
| Emissions                           | 1, 6           |
| Public opinion                      | Online polling |
| Technical data                      | 46-86          |

1. A. Elgowainy, M. Mintz, U. Lee, T. Stephens, P. Sun, K. Reddi, Y. Zhou, G. Zang, M. Ruth, P. Jadun, E. Connelly, R. Boardman. Assessment of Potential Future Demands for Hydrogen in the United States. 2020, Argonne National Laboratory.
2. U.S. Department of Energy. 2016. *2016 Billion-Ton Report: Advancing Domestic Resources for a Thriving Bioeconomy, Volume 1: Economic Availability of Feedstocks*. M. H. Langholtz, B. J. Stokes, and L. M. Eaton (Leads), ORNL/TM-2016/160. Oak Ridge National Laboratory, Oak Ridge, TN. 448p. doi: 10.2172/1271651. <http://energy.gov/eere/bioenergy/2016-billion-ton-report>.
3. Annual Energy Outlook 2022. U.S. Energy Information Administration. <https://www.eia.gov/outlooks/aeo/>
4. Water and Wastewater Annual Price Escalation Rates for Selected Cities Across the United States. U.S. Department of Energy Office of Energy Efficiency & Renewable Energy. <https://www.energy.gov/eere/femp/downloads/water-and-wastewater-annual-price-escalation-rates-selected-cities-across-united>
5. Kramer, A. Advanced Gasifier and Water Gas Shift Technologies for Low Cost Coal Conversion to High Hydrogen Syngas. 2016. Gas Technology Institute. DE-FE0023577 (DOE NETL)
6. Wang, M., et al., Summary of Expansions and Updates in GREET® 2021. 2021, Argonne National Lab: Argonne, IL.
7. Cost to refill. California Fuel Cell Partnership. <https://cafcp.org/content/cost-refill>
8. Orange County Electricity Rates. Electricity Local. <https://www.electricitylocal.com/states/california/orange/>
9. Eudy, L., Post, M. Orange County Transportation Authority Fuel Cell Electric Bus Progress Report. 2020. NREL/PR-5400-78250.
10. Report Confirms Wind Technology Advancements Continue to Drive Down the Cost of Wind Energy. Berkeley Lab. <https://newscenter.lbl.gov/2019/08/26/report-confirms-wind-technology-advancements-continue-to-drive-down-the-cost-of-wind-energy/>
11. Solar Panels in Orange County. Energy Sage. <https://www.energysage.com/local-data/solar-panel-cost/>

12. Orange County, California Electric Profile. Find Energy. <https://findenergy.com/ca/orange-county-electricity>
13. Wind Turbines in Texas. Quick Electricity. <https://quickelectricity.com/wind-turbines-in-texas/>
14. Solar Panel in Aransas County. Energy Sage. <https://www.energysage.com/local-data/solar-panel-cost/tx/aransas-county/>
15. Port Aransas Electricity Rates. Energy Bot. <https://www.energybot.com/electricity-rates/texas/port-aransas/>
16. Volusia County, Florida Electric Profile. Find Energy. <https://findenergy.com/fl/volusia-county-electricity/>
17. Santa Cruz Electricity Rates. Electricity Local. <https://www.electricitylocal.com/states/california/santa-cruz/>
18. Clean electricity gains momentum in Orange County despite price hikes. The OC Register. <https://www.ocregister.com/2022/02/02/clean-electricity-gains-momentum-in-orange-county-despite-price-hikes/>
19. Texas Electricity Resources. Comptroller Texas. <https://comptroller.texas.gov/economy/fiscal-notes/2020/august/ercot.php>
20. Volusia County Sustainable Action Plan. AECOM.
21. Fact check: The causes for Texas' blackout go well beyond wind turbines. Reuters. <https://www.reuters.com/article/uk-factcheck-texas-wind-turbines-explain-idUSKBN2AJ2EI>
22. World's Largest Green Hydrogen Project to Launch in California. SG H2 Energy. <https://www.sgh2energy.com/worlds-largest-green-hydrogen-project-to-launch-in-california>
23. State of Texas Energy Sector Risk Profile. Department of Energy.
24. Green Hydrogen International Announces Hydrogen City, Texas. PR Newswire. <https://www.prnewswire.com/news-releases/green-hydrogen-international-announces-hydrogen-city-texas>
25. Solar Panels in Chambers County. Energy Sage. <https://www.energysage.com/local-data/solar-panel-cost/tx/chambers-county/>
26. Manatee County, Florida Electric Profile. Find energy. <https://findenergy.com/fl/manatee-county-electricity>
27. Solar Panels in Manatee County. Energy Sage. <https://www.energysage.com/local-data/solar-panel-cost/fl/manatee-county/>
28. Solar Panels in Volusia County. Energy Sage. <https://www.energysage.com/local-data/solar-panel-cost/fl/volusia-county/>
29. New York Gives Big Boost to Renewable Energy. ERDC. <https://www.nrdc.org/experts/cullen-howe/new-york-lays-down-gauntlet-renewable-energy#:~:tex>
30. Los Angeles & Orange County Office Markets. Commercial Café. <https://www.commercialcafe.com/blog/socal-q3-2019-office-market-report/>
31. Port Aransas Commercial Real Estate. Loopnet. <https://www.loopnet.com/search/commercial-real-estate/port-aransas-tx/for-sale/>
32. Chambers County, TX Real Estate Market. Realtor. [https://www.realtor.com/realestateandhomes-search/Chambers-County\\_TX/overview](https://www.realtor.com/realestateandhomes-search/Chambers-County_TX/overview)
33. Manatee Country Commercial Real Estate. Loopnet. <https://www.loopnet.com/search/commercial-real-estate/Manatee-county-fl/for-sale/>
34. Current West Texas Intermediate Crude Oil (WTI) Prices. UP. <https://www.up.com/customers/surcharge/wti/prices/index.htm>
35. California Average Gas Prices. Gas Prices. <https://gasprices.aaa.com/?state=CA>
36. Asian shares extend loss as oil prices push higher. OC Register. <https://www.ocregister.com/2022/03/07/asian-shares-extend-losses-as-oil-prices-push-higher/>
37. Gas Prices in Port Aransas, TX. Gas Buddy. <https://www.gasbuddy.com/gasprices/texas/port-aransas>
38. Gas Prices in Chambers, TX. Gas Buddy. <https://www.gasbuddy.com/gasprices/texas/1107>
39. California Scrap Metal Prices – USA. Price of Scrap Metals. <https://www.priceofscrapmetals.com/california/>
40. Price of Metal in Manatee County. Metal Supermarkets. <https://www.metalsupermarkets.com/location/sarasota/>
41. Database of State Incentives for Renewables & Efficiency. DSIRE USA. <https://www.dsireusa.org/>

42. Hydrogen Laws and Incentives in New York. Alternative Fuels Data Center. <https://afdc.energy.gov/fuels/laws/HY?state=ny>
43. California Green Energy Incentives. Alternative Fuels Data Center. <https://afdc.energy.gov/laws/all?state=CA>
44. Texas Solar Incentives. Sun Run. <https://www.sunrun.com/solar-by-state/tx/texas-solar-incentives>
45. Texas Solar Incentives and Rebates. Freedom Solar Power. <https://freedomsolarpower.com/texas-solar-incentives-and-rebates>
46. Preuster, P., et al. (2017). "Liquid Organic Hydrogen Carriers (LOHCs): Toward a Hydrogen-free Hydrogen Economy." *Acc Chem Res* 50(1): 74-85.
47. The Plug 10 MW Electrolyzer. Plug Power. <https://www.plugpower.com/>
48. Majumdar A, Deutch JM, Prasher RS, Griffin TP. A framework for a hydrogen economy. *Joule*. 2021;5(8):1905-8.
49. 2021 Annual Evaluation of Fuel Cell Electric Vehicle Deployment and Hydrogen Fuel Station Network Development. California Air Resources Board, September 2021.
50. Assessment of Potential Future Demands for Hydrogen in the United States. Argonne National Laboratory. October 2020.
51. Salkuyeh YK, et al., Techno-economic analysis and life cycle assessment of hydrogen production from different biomass gasification processes, *International Journal of Hydrogen Energy* (2018), <https://doi.org/10.1016/j.ijhydene.2018.04.024>
52. Segurado R, Pereira S, Correia D, Costa M. Techno-economic analysis of a trigeneration system based on biomass gasification. *Renewable and Sustainable Energy Reviews*. 2019;103:501-14.
53. Bloom Electrolyzer Data Sheet. Bloom Energy. <https://www.bloomenergy.com/>
54. Lee D-Y, Elgowainy A, Dai Q. Life cycle greenhouse gas emissions of hydrogen fuel production from chlor-alkali processes in the United States. *Applied Energy*. 2018;217:467-79.
55. Supekar SD, Skerlos SJ. Market-driven emissions from recovery of carbon dioxide gas. *Environ Sci Technol*. 2014;48(24):14615-23.
56. Lee J, Lee W, Ryu KH, Park J, Lee H, Lee JH, et al. Catholyte-free electroreduction of CO<sub>2</sub> for sustainable production of CO: concept, process development, techno-economic analysis, and CO<sub>2</sub> reduction assessment. *Green Chemistry*. 2021;23(6):2397-410.
57. Ramdin M, De Mot B, Morrison ART, Breugelmans T, van den Broeke LJP, Trusler JPM, et al. Electroreduction of CO<sub>2</sub>/CO to C<sub>2</sub> Products: Process Modeling, Downstream Separation, System Integration, and Economic Analysis. *Ind Eng Chem Res*. 2021;60(49):17862-80.
58. Source: O.K. Buros, et. al., *The USAID Desalination Manual*. Englewood, N.J., U.S.A., IDEA Publications, 1982.
59. Jing X, Li F, Wang Y. Assessing the economic potential of large-scale carbonate-formation-free CO<sub>2</sub> electrolysis. *Catalysis Science & Technology*. 2022.
60. Hunter CA, Penev MM, Reznicek EP, Eichman J, Rustagi N, Baldwin SF. Techno-economic analysis of long-duration energy storage and flexible power generation technologies to support high-variable renewable energy grids. *Joule*. 2021;5(8):2077-101.
61. Kurtz, Jennifer, Sam Sprik, Genevieve Saur, and Shaun Onorato. 2019. Fuel Cell Electric Vehicle Driving and Fueling Behavior. Golden, CO: National Renewable Energy Laboratory. NREL/TP-5400-73010. <https://www.nrel.gov/docs/fy19osti/73010.pdf>.
62. García-Payo MC, Rivier CA, Marison IW, von Stockar U. Separation of binary mixtures by thermostatic sweeping gas membrane distillation: II. Experimental results with aqueous formic acid solutions. *Journal of Membrane Science*. 2002;198(2):197-210.
63. Freedman, Y., Hastings, A., Varela. Prepared Direct Testimony of Yuri Freedman, Austin Hastings, and Joseph C. Varela, on behalf of the Southern California Gas Company, San Diego Gas & Electric Company, Pacific Gas and Electric Company, and Southwest Gas Corporation. November 2020.
64. Ball M, Weeda M. The hydrogen economy – Vision or reality? *International Journal of Hydrogen Energy*. 2015;40(25):7903-19.
65. Zhu Q-L, Xu Q. Liquid organic and inorganic chemical hydrides for high-capacity hydrogen storage. *Energy & Environmental Science*. 2015;8(2):478-512.

66. Labbaf B, Tabatabaei M, Mostafavi E, Tijani M, Mahinpey N. Methanol production via integrated methane reforming and chemical looping combustion: Process simulation and techno-economic assessment. *Process Safety and Environmental Protection*. 2021;148:1346-56.
67. He L, Liu H, Xiao C-x, Kou Y. Liquid-phase synthesis of methyl formate via heterogeneous carbonylation of methanol over a soluble copper nanocluster catalyst. *Green Chemistry*. 2008;10(6):619-22.
68. Giuliano A, Freda C, Catizzone E. Techno-Economic Assessment of Bio-Syngas Production for Methanol Synthesis: A Focus on the Water-Gas Shift and Carbon Capture Sections. *Bioengineering*. 2020;7(3).
69. Reymond H, Vitas S, Vernuccio S, von Rohr PR. Reaction Process of Resin-Catalyzed Methyl Formate Hydrolysis in Biphasic Continuous Flow. *Industrial & Engineering Chemistry Research*. 2017;56(6):1439-49.
70. Kaiser D, Beckmann L, Walter J, Bertau M. Conversion of Green Methanol to Methyl Formate. *Catalysts*. 2021;11(7).
71. Yang, J., Bai, P., Yin, Kun. Operation and Control of Reactive Distillation of Synthesis of Methyl Formate. *Asian Journal of Chemistry*. 2013;8:4177-4182.
72. Gomez JR et al., Techno-economic analysis and life cycle assessment for electrochemical ammonia production using proton conducting membrane, *International Journal of Hydrogen Energy*, <https://doi.org/10.1016/j.ijhydene.2019.10.174>
- J, Park Y, Brigljević B, Lee B, Lim D, Lee T, et al. An efficient process for sustainable and scalable hydrogen production from green ammonia. *Renewable and Sustainable Energy Reviews*. 2021;152:111562.
73. Ruth, Mark, Paige Jadun, Nicholas Gilroy, Elizabeth Connelly, Richard Boardman, A.J. Simon, Amgad Elgowainy, and Jarett Zuboy. 2020. The Technical and Economic Potential of the H2@Scale Concept within the United States. Golden, CO: National Renewable Energy Laboratory. NREL/TP- 6A20-77610. <https://www.nrel.gov/docs/fy21osti/77610.pdf>.
74. Marcoberardino GD, Vitali D, Spinelli F, Binotti M, Manzolini G. Green Hydrogen Production from Raw Biogas: A Techno-Economic Investigation of Conventional Processes Using Pressure Swing Adsorption Unit. *Processes*. 2018;6(3).
75. Pump Life Cycle Costs: A Guide to LCC Analysis for Pumping Systems. US Department of Energy's Office of Industrial Technologies (OIT).
76. Yates J, Daiyan R, Patterson R, Egan R, Amal R, Ho-Baille A, et al. Techno-economic Analysis of Hydrogen Electrolysis from Off-Grid Stand-Alone Photovoltaics Incorporating Uncertainty Analysis. *Cell Reports Physical Science*. 2020;1(10):100209.
77. Rezaei E, Dzuryk S. Techno-economic comparison of reverse water gas shift reaction to steam and dry methane reforming reactions for syngas production. *Chemical Engineering Research and Design*. 2019;144:354-69.
78. Byun M, Lee B, Lee H, Jung S, Ji H, Lim H. Techno-economic and environmental assessment of methanol steam reforming for H2 production at various scales. *International Journal of Hydrogen Energy*. 2020;45(46):24146-58.
79. Tian H, Mancilla-David F, Ellis K, Jenkins P, Muljadi E. A Detailed Performance Model for Photovoltaic Systems. July 2012 National Renewable Energy Laboratory. NREL/JA-5500-54601.
80. Vogl V, Åhman M, Nilsson LJ. Assessment of hydrogen direct reduction for fossil-free steelmaking. *Journal of Cleaner Production*. 2018;203:736-45.
81. Tremel A, Wasserscheid P, Baldauf M, Hammer T. Techno-economic analysis for the synthesis of liquid and gaseous fuels based on hydrogen production via electrolysis. *International Journal of Hydrogen Energy*. 2015;40(35):11457-64.
82. Grandholm, J.M. 2021: U.S. Department of Energy Shot Summit.
83. Penev, M., et al., H2A Hydrogen Production Model. 2018: National Renewable Energy Laboratory.
84. Feldman, D., et al., U.S. Solar Photovoltaic System and Energy Storage Cost Benchmark: Q1 2020. 2021, National Renewable Energy Laboratory. NREL/TP-6A20-77324: Golden, CO.
85. Elgowainy, A., et al., Impact of Hydrogen Refueling Configurations and Market Parameters on the Refueling Cost of Hydrogen, A.N. Laboratory, Editor. 2017: Argonne, IL.
